# Supplementary material for: Supramolecular chemistry in solution and solid–gas interfaces: synthesis and photophysical properties of monocolor and bicolor fluorescent sensors for barium tagging in neutrinoless double beta decay
Source: Royal Society of Chemistry journal article supplement (doi:10.1039/d4lf00227j), 2024-11-04
Supplement: d4lf00227j1.pdf [file d4lf00227j1.pdf]

Electronic supplementary information

## **Supramolecular Chemistry in Solution and Solid-Gas Interfaces: Synthesis and Photophysical Properties of Monocolor and Bicolor Sensors for Barium Tagging in Neutrinoless Double Beta Decay Nuclear Reactions**

Fernando Auria-Luna,<sup>a</sup> Frank W. Foss Jr,<sup>b</sup> Juan Molina-Canteras,<sup>a</sup> Ivan Velazco-Cabral,<sup>c</sup> Aimar Marauri,<sup>ad</sup> Amaia Larumbe,<sup>a</sup> Borja Aparicio,<sup>ae</sup> Juan Luis Vázquez,<sup>c</sup> Nerea Alberro,<sup>a</sup> Iosune Arrastia,<sup>a</sup> Virginia San Nacianceno,<sup>a</sup> Adai Colom,<sup>fg</sup> Carlos Marcuello,<sup>d</sup> Benjamin J. P. Jones,<sup>b</sup> David Nygren,<sup>b</sup> Juan J. Gómez-Cadenas,<sup>fh</sup> Celia Rogero,<sup>hi</sup> Iván Rivilla,<sup>\*fh</sup> Fernando P. Cossío,<sup>\*a</sup>  
and the NEXT collaboration

<sup>a</sup>*Departamento de Química Orgánica I and Centro de Innovación y Química Avanzada (ORFEO-CINQA), Facultad de Química/Kimika Fakultatea, Universidad del País Vasco/Euskal Herriko Unibertsitatea (UPV/EHU), 20018 Donostia-San Sebastian, Spain*

<sup>b</sup>*Department of Chemistry and Biochemistry, University of Texas at Arlington, Arlington, Texas 76019, United States*

<sup>c</sup>*Department of Chemistry, University of Guanajuato, 36050 Guanajuato, Gto, Mexico*

<sup>d</sup>*Biofisika Institute (CSIC, UPV/EHU), 48940 Leioa, Spain.*

<sup>e</sup>*Present address: Centro de Investigación en Química Biológica e Materiais Moleculares (CiQUS) and Departamento de Química Orgánica, Universidade de Santiago de Compostela, 15782 Santiago de Compostela (Spain).*

<sup>f</sup>*Ikerbasque, Basque Foundation for Science, 48009 Bilbao, Spain.*

<sup>g</sup>*Department of Biochemistry and Molecular Biology, Faculty of Science and Technology, Campus Universitario, Universidad del País Vasco/Euskal Herriko Unibertsitatea (UPV/EHU), 48940 Leioa, Spain.*

<sup>h</sup>*Donostia International Physics Center (DIPC), 20018 Donostia-San Sebastian, Spain*

<sup>i</sup>*Materials Physics Center (CSIC-UPV/EHU), San Sebastián, E-20018, Spain*

## NEXT Collaboration Author List:

C. Adams,<sup>1</sup> H. Almazán,<sup>2</sup> V. Álvarez,<sup>3</sup> B. Aparicio,<sup>4</sup> A.I. Aramburu,<sup>5</sup> L. Arazi,<sup>6</sup> I.J. Arnquist,<sup>7</sup> F. Auria-Luna,<sup>4</sup> S. Ayet,<sup>8</sup> C.D.R. Azevedo,<sup>9</sup> K. Bailey,<sup>1</sup> F. Ballester,<sup>3</sup> M. del Barrio-Torregrosa,<sup>10</sup> A. Bayo,<sup>11</sup> J.M. Benlloch-Rodríguez,<sup>10</sup> F.I.G.M. Borges,<sup>12</sup> A. Brodolin,<sup>10</sup> N. Byrnes,<sup>13</sup> S. Cárcel,<sup>8</sup> A. Castillo,<sup>10</sup> S. Cebrián,<sup>14</sup> E. Church,<sup>7</sup> L. Cid,<sup>11</sup> C.A.N. Conde,<sup>12</sup> T. Contreras,<sup>15</sup> F.P. Cossío,<sup>4</sup> E. Dey,<sup>13</sup> G. Díaz,<sup>16</sup> T. Dickel,<sup>17</sup> C. Echevarria,<sup>10</sup> M. Elorza,<sup>10</sup> J. Escada,<sup>12</sup> R. Esteve,<sup>3</sup> R. Felkai,<sup>6,a</sup> L.M.P. Fernandes,<sup>18</sup> P. Ferrario,<sup>10,19</sup> A.L. Ferreira,<sup>9</sup> F.W. Foss,<sup>20</sup> Z. Freixa,<sup>5,19</sup> J. García-Barrena,<sup>3</sup> J.J. Gómez-Cadenas,<sup>10,19,b</sup> R. González,<sup>10</sup> J. Grocott,<sup>2</sup> R. Guenette,<sup>2</sup> J. Hauptman,<sup>21</sup> C.A.O. Henriques,<sup>18</sup> J.A. Hernando Morata,<sup>16</sup> P. Herrero-Gómez,<sup>22</sup> V. Herrero,<sup>2</sup> C. Hervés Carrete,<sup>16</sup> Y. Ifergan,<sup>6</sup> B.J.P. Jones,<sup>13</sup> F. Kellerer,<sup>8</sup> L. Larizgoitia,<sup>10</sup> A. Larumbe,<sup>4</sup> P. Lebrun,<sup>23</sup> F. López,<sup>10</sup> N. López-March,<sup>8</sup> R. Madigan,<sup>20</sup> R.D.P. Mano,<sup>18</sup> A.P. Marques,<sup>12</sup> J. Martín-Albo,<sup>8</sup> G. Martínez-Lema,<sup>6</sup> M. Martínez-Vara,<sup>10</sup> R. Miller,<sup>20</sup> K. Mistry,<sup>13</sup> J. Molina-Canteras,<sup>4</sup> F. Monrabal,<sup>10,19</sup> C.M.B. Monteiro,<sup>18</sup> F.J. Mora,<sup>3</sup> K. Navarro,<sup>13</sup> P. Novella,<sup>8</sup> A. Nuñez,<sup>11</sup> D.R. Nygren,<sup>13</sup> E. Oblak,<sup>10</sup> J. Palacio,<sup>11</sup> B. Palmeiro,<sup>2</sup> A. Para,<sup>23</sup> I. Parmaksiz,<sup>13</sup> A. Pazos,<sup>5</sup> J. Pelegrin,<sup>10</sup> M. Pérez Maneiro,<sup>16</sup> M. Querol,<sup>8</sup> A.B. Redwine,<sup>6</sup> J. Renner,<sup>16</sup> I. Rivilla,<sup>10,19</sup> C. Rogero,<sup>24</sup> L. Rogers,<sup>1</sup> B. Romeo,<sup>10</sup> C. Romo-Luque,<sup>8</sup> F.P. Santos,<sup>12</sup> J.M.F. dos Santos,<sup>18</sup> M. Seemann,<sup>10</sup> I. Shomroni,<sup>22</sup> P.A.O.C. Silva,<sup>18</sup> V. San Nacienciano,<sup>4</sup> A. Simón,<sup>10</sup> S.R. Soleti,<sup>10</sup> M. Sorel,<sup>8</sup> J. Soto-Oton,<sup>8</sup> J.M.R. Teixeira,<sup>18</sup> S. Teruel-Pardo,<sup>8</sup> J.F. Toledo,<sup>3</sup> C. Tonnelé,<sup>10</sup> J. Torrent,<sup>10,25</sup> A. Trettin,<sup>2</sup> A. Usón,<sup>8</sup> P.R.G. Valle,<sup>5,10</sup> J.F.C.A. Veloso,<sup>9</sup> J. Waiton<sup>2</sup> and A. Yubero-Navarro.<sup>10</sup>

<sup>1</sup>Argonne National Laboratory, Argonne, IL 60439, USA

<sup>2</sup>Department of Physics and Astronomy, Manchester University, Manchester. M13 9PL, United Kingdom

<sup>3</sup>Instituto de Instrumentación para Imagen Molecular (I3M), Centro Mixto CSIC - Universitat Politècnica de Valencia, Camino de Vera s/n, Valencia, E-46022, Spain

<sup>4</sup>Department of Organic Chemistry I, University of the Basque Country (UPV/EHU), Centro de Innovación en Química Avanzada (ORFEO-CINQA), San Sebastián / Donostia, E-20018, Spain

<sup>5</sup>Department of Applied Chemistry, Universidad del País Vasco (UPV/EHU), Manuel de Lardizabal 3, San Sebastian / Donostia, E-20018, Spain

<sup>6</sup>Unit of Nuclear Engineering, Faculty of Engineering Sciences, Ben-Gurion University of the Negev, P.O.B. 653, Beer-Sheva, 8410501, Israel

<sup>7</sup>Pacific Northwest National Laboratory (PNNL), Richland, WA 99352, USA

<sup>8</sup>Instituto de Física Corpuscular (IFIC), CSIC & Universitat de València, Calle Catedrático José Beltrán, 2, Paterna, E-46980, Spain

<sup>9</sup>Institute of Nanostructures, Nanomodelling and Nanofabrication (i3N), Universidade de Aveiro, Campus de Santiago, Aveiro, 3810-193, Portugal

<sup>10</sup>Donostia International Physics Center, BERC Basque Excellence Research Centre, Manuel de Lardizabal 4, San Sebastian / Donostia, E-20018, Spain

<sup>11</sup>Laboratorio Subterráneo de Canfranc, Paseo de los Ayerbe s/n, Canfranc Estación, E-22880, Spain

<sup>12</sup>LIP, Department of Physics, University of Coimbra, Coimbra, 3004-516, Portugal

<sup>13</sup>Department of Physics, University of Texas at Arlington, Arlington, TX 76019, USA

---

<sup>a</sup> Now at Weizmann Institute of Science, Israel.

<sup>b</sup> NEXT spokesperson

<sup>14</sup>*Centro de Astropartículas y Física de Altas Energías (CAPA), Universidad de Zaragoza, Calle Pedro Cerbuna, 12, Zaragoza, E-50009, Spain*

<sup>15</sup>*Department of Physics, Harvard University, Cambridge, MA 02138, USA*

<sup>16</sup>*Instituto Gallego de Física de Altas Energías, Univ. de Santiago de Compostela, Campus sur, Rúa Xosé María Suárez Núñez, s/n, Santiago de Compostela, E-15782, Spain*

<sup>17</sup>*II. Physikalisches Institut, Justus-Liebig-Universität Giessen, Giessen, Germany*

<sup>18</sup>*LIBPhys, Physics Department, University of Coimbra, Rua Larga, Coimbra, 3004-516, Portugal*

<sup>19</sup>*Ikerbasque (Basque Foundation for Science), Bilbao, E-48009, Spain*

<sup>20</sup>*Department of Chemistry and Biochemistry, University of Texas at Arlington, Arlington, TX 76019, USA*

<sup>21</sup>*Department of Physics and Astronomy, Iowa State University, Ames, IA 50011-3160, USA*

<sup>22</sup>*Hebrew University, Edmond J. Safra Campus, Jerusalem, 9190401, Israel*

<sup>23</sup>*Fermi National Accelerator Laboratory, Batavia, IL 60510, USA*

<sup>24</sup>*Centro de Física de Materiales (CFM), CSIC & Universidad del País Vasco (UPV/EHU), Manuel de Lardizabal 5, San Sebastián / Donostia, E-20018, Spain*

<sup>25</sup>*Escola Politècnica Superior, Universitat de Girona, Av. Montilivi, s/n, Girona, E-17071, Spain*

## Table of Contents

|                                                   |      |
|---------------------------------------------------|------|
| 1. General Information .....                      | S1   |
| 2. Analytical Methods.....                        | S2   |
| 3. Synthetic Procedures and Analytical Data ..... | S7   |
| 4. NMR Spectra .....                              | S24  |
| 5. Photophysical Properties .....                 | S93  |
| 6. Computational Data.....                        | S113 |
| 7. References .....                               | S138 |

## 1. General Information

All experiments requiring a dry atmosphere were performed using conventional vacuum line and Schlenk techniques. The commercial reagents were purchased from Sigma MERK (Sigma-Aldrich), TCI (Tokio Chemical Industry CO), abcr GmbH and ACROS organics: 1-aza-18-crown-6-ether (TCI, >98%); tris(dibenzylideneacetone)dipalladium(0) (Aldrich, 99.8%); 2-(dicyclohexylphosphino)-2'-(dimethylamino)biphenyl (abcr, >97%); *N*-iodosuccinimide (Aldrich, 95%); ammonium acetate (Aldrich, >98%); 1,1'-bis(diphenylphosphino)ferrocenepalladium (II) dichloride (Fluorochem, 98%); potassium phosphate tribasic (Aldrich, >98%); bromobenzene (Aldrich, 99%); sodium tert-butoxide (Aldrich, 97%); acetic acid, potassium salt (ACROS, 99%); bis(pinacolato)diboron (TCI, 99%); sodium hydroxide (Aldrich, 97%); *N*-hydroxysuccinimide (Aldrich, 98%); *N*-(3-Dimethylaminopropyl)-*N'*-ethylcarbodiimide hydrochloride (Aldrich, commercial grade); triethanolamine (Aldrich, 98%); (3-aminopropyl)triethoxysilane (Aldrich, 98%); kryptofix 22 (Aldrich); benzyl bromide (abcr, 99%); cesium carbonate (Aldrich, 99%); methyl 2-aminopyridine-4-carboxylate (Aldrich, 98%); methyl bromoacetate (Aldrich, 98%); phosphorous(V) oxychloride (Aldrich, 99%); hydriodic Acid (TCI, 57%); sodium iodide (Aldrich, 99%); potassium carbonate (Aldrich, 99%); 18-crown 6-ether (TCI, 99%); 1-fluoro-4-nitrobenzene (Aldrich, 98%), 4-bromo-1,8-naphthalic anhydride (TCI, 99%); 1-methyl-2-pyrrolidinone (Aldrich, 99%); 11-aminoundecylethoxysilane (abcr, 99%); triethanolamine (Aldrich, 99%); and were used without further purification. MeOH (Methanol RA, Oppac); DMF (*N,N*-dimethylformamide, anhydrous 99,8%, MERCK); Hexane (95% alkanes mixture for synthesis, Panreac); CH<sub>2</sub>Cl<sub>2</sub> (Diclorometano RA, Oppac); AcOEt (Etilo Acetato RA, Oppac); Acetone (VWR); MeCN (acetonitrile for HPLC, VWR); DMSO (dimethyl sulfoxide, VWR); toluene (VWR), acetone (VWR), ethanol (VWR).

## 2. Analytical Methods

**Thin layer chromatographies (TLC)** were performed on aluminum TLC plates (silica gel coated with fluorescent indicator F254), and visualized either by exposure to UV light or staining with potassium permanganate or ninhydrine.

**Column chromatographies** were carried out with silica gel 60 (0.040- 0.063 mm).

**Flash chromatographies** were carried out using a Biotage Isolera four system, with Snap KP-Sil 10g cartridges.

**Fourier Transform Infra-Red (FTIR) Spectroscopy** spectra were recorded on an FT-IR spectrometer equipped with a diamond detection and single-reflection ATR module; wavenumbers are given in  $\text{cm}^{-1}$ .

**Melting points (M.p.)** were determined using a Büchi Melting Point B-560 apparatus.

**Nuclear Magnetic Resonance Spectroscopy.**  $^1\text{H}$  NMR or  $^{13}\text{C}$  NMR spectra were recorded at 400 or 500 MHz and 101 or 126 MHz for  $^{13}\text{C}$  NMR, equipped with a z gradient BBOF probe, in  $\text{CDCl}_3$ . The data are reported as s = singlet, d = doublet, t = triplet, q = quartet, p = quintet, m = multiplet or unresolved, br s = broad signal, coupling constant(s) in Hz, integration. The  $^1\text{H}$  spectra were recorded using noesygppr1d sequence from Bruker's library at 500.13 MHz. A time domain of 64 k and a spectral width of 10000 Hz. Interpulse delay: 1 s. Acquisition time: 3 s. Number of scans: 64. Mixing time: 0.01 s.

**Mass spectrometry (MS) and high-resolution mass spectrometry (HRMS).** High-resolution mass spectra (HRMS) were recorded on HPLC Agilent 1200 Series system coupled to a hybrid quadrupole-time of flight (LC-QTOF) mass spectrometer Agilent 6530 from Agilent Technologies (Santa Clara, CA, USA). Mobile phase was composed by 0.1 % formic acid: acetonitrile 0.1% formic acid (50:50). Gas Temp. 325°C; Drying gas: 5 l/min; Nebulizer: 40 psig; Shealt gas Temp. 375 °C; Shealt gas flow: 11 l/min. Vcap: 3500 V(+).

**Confocal Microscopy.** Images were acquired using a Leica Stellaris5 confocal microscope (Leica Microsystems CMS GmbH, Germany) equipped with a TauSense module to acquire lifetime based images. Leica objective HC PL APO CS2 10x/0.40 DRY. Leica HyD detectors. Single-Photon counting mode (In photon counting mode, individual photons are resolved and counted with high fidelity, producing highly accurate and quantitative data).  $\lambda_{\text{exc.}} = 405 \text{ nm}$ , Line Average = 16, Scan Speed = 400 Hz. Pixel Size = 0.024  $\mu\text{m}$ . Physical Length = 24.22  $\mu\text{m}$ . The LAS-X software, version 4.5.0.25531, was used to analyze the images and the open version (Suite X; 3.30.16799) (Leica Microsystems CMS GmbH, Germany). Average emission spectra (Figure 11, panels C and F) were obtained with the same setup.

As a control experiment, the same images shown in Figure 12 were acquired for a sample of compound **15aa** deposited by means of spin coating over ITO without adding  $\text{Ba}^{2+}$ . Images were recorded in both wavelength ranges to make sure that no background signal at 410-470 nm could be miss assigned as the sensor- $\text{Ba}^{2+}$  complex (Figure S1).

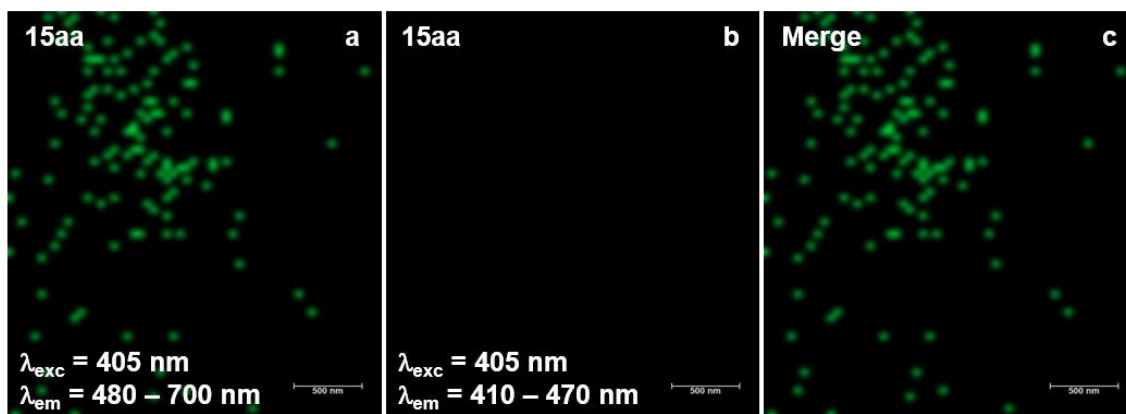

**Figure S1.** Confocal microscopy images of compound **15aa** at the unbound and  $\text{Ba}^{2+}$ -bound channels (see Figure 12, panels a to c, to compare).

**Barium Sublimation.** 3 g of  $\text{Ba}(\text{CF}_3\text{SO}_3)_2$  (melting point:  $>300\text{ }^\circ\text{C}$ ) were sublimated over indium tin oxide (ITO) surfaces with an Aldrich® sublimation apparatus Z221171 refrigerated with a water flow and connected to a vacuum pump providing 0.43 mbar, heating at ca.  $280\text{ }^\circ\text{C}$  for 24 h. After completion, surfaces were kept under an Ar atmosphere until their characterization (Figure S2).

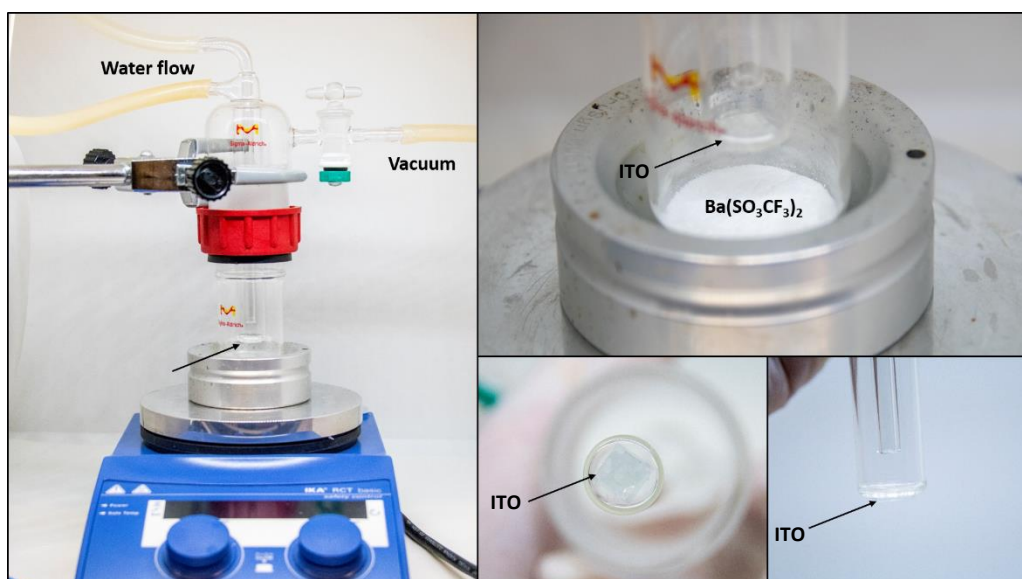

**Figure S2.** Sublimation system.

**UV/Vis and Fluorescence Spectroscopy.** Uv-vis spectra were acquired on a Cary 4000 UV-Vis Spectrophotometer. Emission spectra in solid state and in solution were acquired on an Edinburgh Instruments FLS1000 Spectrophotometer (Edinburgh, Scotland, UK), accuracy  $\pm 0.2$  nm. Quantum Yields were acquired with the Integrating Sphere accessory. Lifetimes were acquired with a picosecond pulsed diode laser EPL-485 nm (Edinburgh, Scotland, UK) and a picosecond pulsed light emitting diode EPLED-340 nm (Edinburgh, Scotland, UK). The spectra were recorded using Starna precision cell made of quartz with a path-length of 1 cm. All solutions were prepared with spectrophotometric grade MeCN in concentrations between  $1 \cdot 10^{-4}$  and  $1 \cdot 10^{-7}$  M, depending on linearity studies. Spectra of chelated fluorescent sensors were acquired by adding 1 equivalent of  $\text{Ba}(\text{ClO}_4)_2$ . To construct the Job's plot different proportion of stock solutions of fluorescent sensors and  $\text{Ba}(\text{ClO}_4)_2$  were mixed and registered, after 1 min of equilibration time.

**Spin coating.** Experiments were performed in a MB-SC-210 (MBRAUN) apparatus integrated into the Globe Box or in a NOVOSPIN C-series model SCC-200 apparatus coupled to a vacuum pump Linicon LV-125A.

**Activation of ITO surfaces.** ITO coating glass was activated by  $\text{O}_2$ -plasma-Ar (Diener Low pressure plasma machine of type Pico).

**Binding constant determination.** All the binding constants shown in Table 2 were calculated following the procedure described in the main manuscript. As an example, absorption data corresponding to compound **7ba**, together with its linear fitting using eq. (5), are shown below (Figure S3).



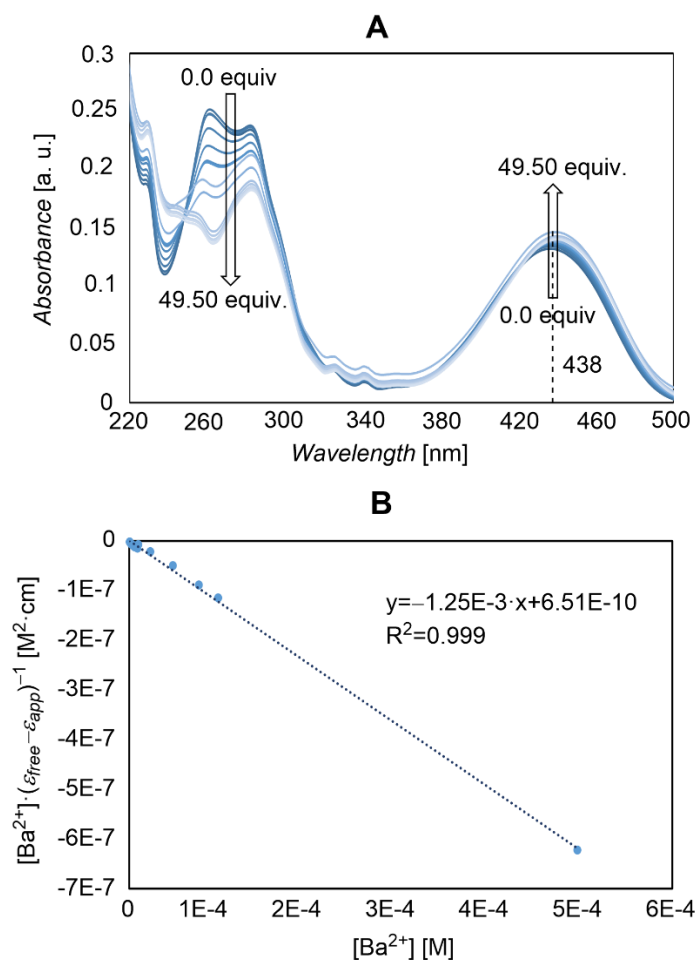

**Figure S3.** (A) Absorption spectra of compound **7ba** in the presence of different equivalents of  $\text{Ba}^{2+}$ . (B) Linear fitting of the terms included in eq. (5) to determine the binding constant  $K_b$  for **7ba**.

**Limit of Detection (LOD).** To obtain the LOD values of the sensors, titration experiments were performed, in which increasing concentrations of  $\text{Ba}(\text{ClO}_4)_2$  were added to a solution  $10 \mu\text{M}$  of the molecule under study. Then,  $(I_{\lambda_{\text{max}}}/I_{0\lambda_{\text{max}}})$  vs.  $[\text{Ba}^{2+}]$  in the case of the monocolor series and  $(I_{\lambda_{\text{bound}}}/I_{\lambda_{\text{free}}})$  vs.  $[\text{Ba}^{2+}]$  in the case of bicolor series were plotted. Finally, a linear fitting was performed and the slope values were used together with the pertinent standard deviation to obtain the detection limits shown below (Table S1).<sup>1</sup>

**Table S1** Limits of Detection (LODs) for compounds **7aa-bb**, **14a,b** and **15aa-bb**.

| Sensor     | LOD<br>[ $\mu\text{M}$ ] <sup>[a]</sup> | LOD<br>[ppb] |
|------------|-----------------------------------------|--------------|
| <b>7aa</b> | 0.228                                   | 31.37        |
| <b>7ab</b> | 0.351                                   | 48.24        |

|             |       |       |
|-------------|-------|-------|
| <b>7ba</b>  | 0.077 | 10.53 |
| <b>7bb</b>  | 0.059 | 8.14  |
| <b>14a</b>  | 0.281 | 38.62 |
| <b>14b</b>  | 0.392 | 53.81 |
| <b>15aa</b> | 0.226 | 31.09 |
| <b>15ab</b> | 0.127 | 17.50 |
| <b>15ba</b> | 0.187 | 25.69 |
| <b>15bb</b> | 0.194 | 26.61 |

<sup>[a]</sup>Calculated as  $LOD = 3\sigma / k$ , where  $\sigma$  is the standard deviation and  $k$  is the slope of the linear fit, respectively.

**Scratch test.** The scratching experiments were carried out using a *JKP Nanowizard UltraSpeed AFM* equipped with a *Super Sharp Silicon<sup>TM</sup>* (SSS-NCHR-10) AFM probe, with a nominal spring constant between 20 N/m. The AFM probe was calibrated to ascertain the deflection sensitivity and spring constant values by running force-distance curves on a stiff quartz surface and by the thermal tune.<sup>2</sup> The images were taken in contact mode, and the set point applied for the scratching experiment was 3500 nN, which is enough to remove the organic and ITO layers and maintain the quartz surface without damage. The resonance frequency of the AFM lever was settled at 60 KHz. Scratching was done by passing five times per area. Five different areas of 500 nm x 500 nm were scratched in each sample, and images after the experiment were 4  $\mu$ m x 4  $\mu$ m in a resolution of 256 x 256 pixels/frame. The raw gathered data was processed using ImageJ 2.14. software tool (Figure 4).<sup>3</sup>

### 3. Synthetic Procedures and Analytical Data

#### Synthesis of compounds **2a** and **2b**.

Compounds **2a** and **2b** were obtained following a modified procedure described by Sibert et al.<sup>4</sup> (Scheme S1) Spectral data for compound **2a** are consistent with the previously reported values.<sup>4</sup>

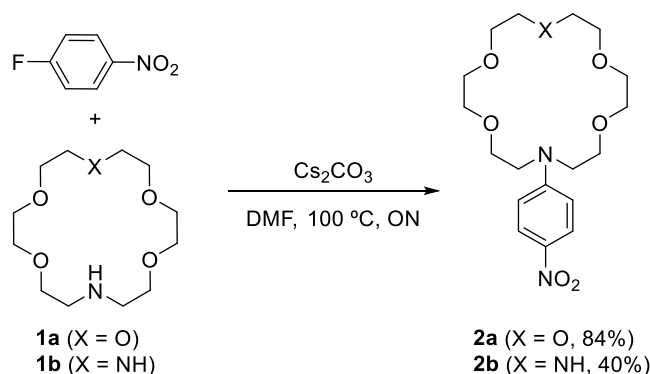

**Scheme S1.** Synthesis of compounds **2a** and **2b**.

To a microwave sealable glass vial equipped with a magnetic stirrer, the corresponding crown ether **1** (1.0 mmol, 1.0 equiv.),  $\text{Cs}_2\text{CO}_3$  (325.8 mg, 1.0 mmol, 1.0 equiv.), 2.5 mL of DMF and 1-fluoro-4-nitrobenzene (106  $\mu\text{L}$ , 1.0 mmol, 1.0 equiv.) were added sequentially. The vial was sealed, purged with argon, heated to  $100\text{ }^\circ\text{C}$  in an oil bath and stirred overnight.

Purification: The reaction mixture was cooled to room temperature and the solvent was removed under reduced pressure. The crude was then dissolved in 50 mL of AcOEt and washed with Brine (3x50 mL). The organic fraction was collected, dried over  $\text{MgSO}_4$ , filtered and evaporated under reduced pressure. Finally, the resulting oil was further purified by column chromatography on silica gel and a gradient of polarity from  $\text{CH}_2\text{Cl}_2$  to a  $\text{CH}_2\text{Cl}_2$ :MeOH mixture (9:1), affording the corresponding final adducts **2a** and **2b**.

#### **16-(4-Nitrophenyl)-1,4,7,10,13-pentaoxa-16-azacyclooctadecane 2a.**

Following the general procedure, compound **2a** was obtained as a yellow oil in 84% yield.  $^1\text{H}$  NMR (400 MHz,  $\text{CDCl}_3$ )  $\delta$  8.13 – 8.06 (m, 2H), 6.70 – 6.62 (m, 2H), 3.76 – 3.61 (m, 24H).

#### **7-(4-Nitrophenyl)-1,4,10,13-tetraoxa-7,16-diazacyclooctadecane 2b.**

Following the general procedure, compound **2b** was obtained as a yellow oil in 40% yield.  $^1\text{H}$  NMR (400 MHz,  $\text{CDCl}_3$ )  $\delta$  8.14 – 8.04 (m, 2H), 6.65 – 6.58 (m, 2H), 3.83 – 3.58 (m, 20H), 2.88 (t,  $J = 4.7$  Hz, 4H).  $^{13}\text{C}$ -NMR (101 MHz,  $\text{CDCl}_3$ )  $\delta$  152.9, 137.1, 126.5, 110.3, 70.5, 70.4, 69.5, 68.5, 51.1, 49.2. IR(solid)  $\nu_{\text{max}}$  2865, 1594, 1480, 1312, 1105, 824, 751.  $\text{cm}^{-1}$ . HRMS (ESI) (m/z):  $[\text{M}]^+$  calcd. for  $\text{C}_{18}\text{H}_{29}\text{N}_3\text{O}_6$ , 383.2056; found, 383.2056.

## Synthesis of compounds **4a** and **4b**.

Compounds **4a** and **4b** were obtained following a modified procedure described by Thapa et al.<sup>5</sup> (Scheme S2) Spectral data for compounds **4a** and **4b** are consistent with the previously reported values.<sup>5</sup>

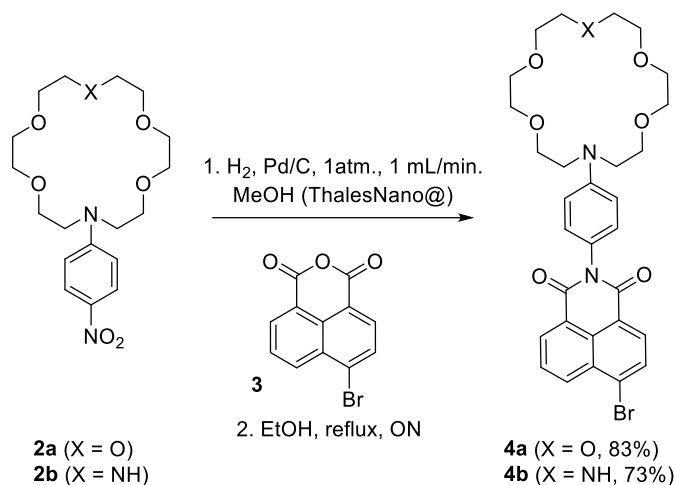

### Scheme S2. Synthesis of compounds **4a** and **4b**.

The corresponding nitro compound **2** (0.5 mmol, 1.1 equiv.) was reduced using a ThalesNano hydrogenation flow reactor (2.5 mM, Pd/C, 1 atm, 30 °C, 1 mL/min) using methanol as the solvent and pouring the product directly over a round bottom flask charged with 4-bromo-1,8-naphthalic anhydride (124.7 mg, 0.45 mmol, 1.0 equiv.). The solvent was removed under reduced pressure and the crude was dissolved in 2 mL of EtOH, transferred to a microwave sealable glass vial equipped with a magnetic stirrer, sealed, heated to 77 °C in an oil bath and stirred overnight.

Purification: The reaction mixture was cooled to room temperature and the solvent was removed under reduced pressure. Then, the crude was further purified by column chromatography on silica gel and a gradient of polarity from CH<sub>2</sub>Cl<sub>2</sub> to a CH<sub>2</sub>Cl<sub>2</sub>:MeOH mixture (9:1), affording the corresponding final adducts **4a** and **4b**.

### 2-(4-(1,4,7,10,13-Pentaoxa-16-azacyclooctadecan-16-yl)phenyl)-6-bromo-1H-benzo[de]isoquinoline-1,3(2H)-dione **4a**.

Following the general procedure, compound **4a** was obtained as a yellow solid in 83% yield. <sup>1</sup>H NMR (400 MHz, CDCl<sub>3</sub>) δ 8.69 (dd, *J* = 7.3, 1.3 Hz, 1H), 8.61 (dd, *J* = 8.5, 1.3 Hz, 1H), 8.45 (d, *J* = 7.9 Hz, 1H), 8.06 (d, *J* = 7.9 Hz, 1H), 7.87 (dd, *J* = 8.6, 7.3 Hz, 1H), 7.10 (d, *J* = 9.0 Hz, 2H), 6.79 (d, *J* = 9.1 Hz, 2H), 3.82 – 3.52 (m, 24H).

### 2-(4-(1,4,10,13-tetraoxa-7,16-diazacyclooctadecan-7-yl)phenyl)-6-bromo-1H-benzo[de]isoquinoline-1,3(2H)-dione **4b**.

Following the general procedure, compound **4b** was obtained as a yellow solid in 73% yield.  $^1\text{H}$  NMR (400 MHz,  $\text{CDCl}_3$ )  $\delta$  8.70 (dd,  $J = 7.3, 1.3$  Hz, 1H), 8.62 (dd,  $J = 8.6, 1.3$  Hz, 1H), 8.45 (d,  $J = 7.9$  Hz, 1H), 8.07 (d,  $J = 7.9$  Hz, 1H), 7.87 (dd,  $J = 8.6, 7.3$  Hz, 1H), 7.11 (d,  $J = 9.0$  Hz, 2H), 6.81 (d,  $J = 9.1$  Hz, 2H), 3.82 – 3.52 (m, 20H), 3.09 – 2.87 (m, 4H).

### Synthesis of compound **4c**.

Compound **4c** was obtained following a modified procedure described by Thapa et al.<sup>5</sup> (Scheme S3)

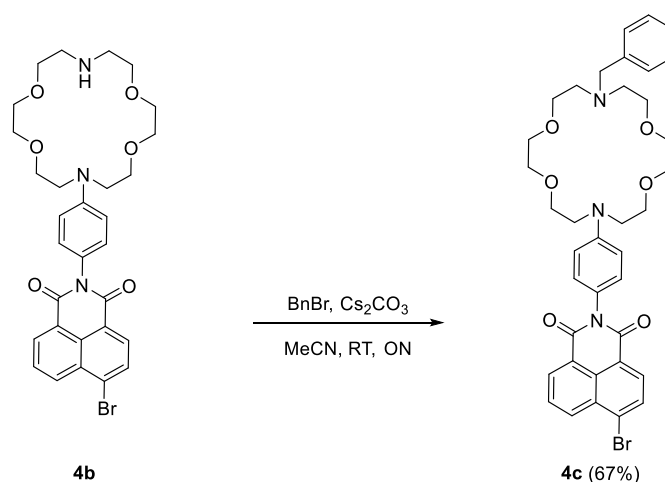

### Scheme S3. Synthesis of compound **4c**.

To a microwave sealable glass vial equipped with a magnetic stirrer, amine derivative **4b** (61.2 mg, 0.1 mmol, 1.0 equiv.),  $\text{Cs}_2\text{CO}_3$  (32.5 mg, 0.1 mmol, 1.0 equiv.) and 1.0 mL of acetonitrile were added sequentially. The vial was sealed, purged with argon and benzyl bromide (13  $\mu\text{L}$ , 0.11 mmol, 1.1 equiv.) was added dropwise to the mixture. The reaction was stirred at room overnight.

Purification: The reaction mixture was cooled to room temperature and the solvent was removed under reduced pressure. The crude was further purified by column chromatography on silica gel and a gradient of polarity from  $\text{CH}_2\text{Cl}_2$  to a  $\text{CH}_2\text{Cl}_2$ :MeOH mixture (9:1), affording the corresponding final adduct **4c**.

### 2-(4-(16-Benzyl-1,4,10,13-tetraoxa-7,16-diazacyclooctadecan-7-yl)phenyl)-6-bromo-1H-benzo[de]isoquinoline-1,3(2H)-dione **4c**.

Following the general procedure, compound **4c** was obtained as a yellow solid in 67% yield.  $^1\text{H}$  NMR (400 MHz,  $\text{CDCl}_3$ )  $\delta$  8.70 (dd,  $J = 7.3, 1.3$  Hz, 1H), 8.62 (dd,  $J = 8.5, 1.3$  Hz, 1H), 8.46 (d,  $J = 7.9$  Hz, 1H), 8.07 (d,  $J = 7.9$  Hz, 1H), 7.87 (dd,  $J = 8.6, 7.3$  Hz, 1H), 7.50 – 7.15 (m, 6H), 7.11

(d,  $J = 9.0$  Hz, 2H), 6.79 (d,  $J = 9.1$  Hz, 2H), 3.83 – 3.54 (m, 20H), 2.84 (t,  $J = 5.8$  Hz, 4H).  $^{13}\text{C}$ -NMR (101 MHz,  $\text{CDCl}_3$ )  $\delta$  164.3, 148.2, 139.8, 133.5, 132.5, 131.7, 131.3, 130.9, 130.5, 129.5, 129.2, 129.0, 128.3, 128.3, 127.0, 123.6, 123.0, 122.8, 111.9, 71.2, 70.8, 70.4, 68.9, 60.0, 53.9, 51.6. IR(solid)  $\nu_{\text{max}}$  2974, 2866, 1601, 1354, 1316, 1282, 1110, 812, 654.  $\text{cm}^{-1}$ . HRMS (ESI) (m/z):  $[\text{M}]^+$  calcd. for  $\text{C}_{37}\text{H}_{40}\text{BrN}_3\text{O}_6$ , 701.2100; found, 701.2131. m.p.: 124-126  $^\circ\text{C}$ .

### Synthesis of compounds **6a** and **6b**.

Compounds **6a** and **6b** were obtained following a modified procedure described by Chen et al.<sup>6</sup> (Scheme S4)

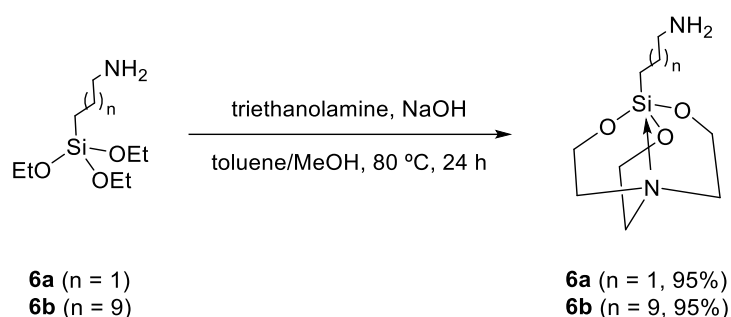

### Scheme S4. Synthesis of compounds **6a** and **6b**.

To a round bottom flask equipped with a magnetic stirrer, 30 mL of toluene, the corresponding triethoxysilane derivative **5** (18.80 mmol, 1.0 equiv.), triethanolamine (2.5 mL, 2800 mg, 18.80 mmol, 1.0 equiv.), 14.2 mL of MeOH and NaOH (7.5 mg, 0.19 mmol, 0.01 equiv.) were added sequentially. The reaction was heated to 80  $^\circ\text{C}$  in an oil bath and stirred for 24 h.

Purification: The reaction mixture was cooled to room temperature and the solvent was removed under reduced pressure. Then, the crude was washed with *n*-hexane (3x50 mL) and filtered. Finally, the residual solvent was evaporated under reduced pressure, affording the corresponding final adducts **6a** and **6b**.

#### 3-(2,8,9-Trioxa-5-aza-1-silabicyclo[3.3.3]undecan-1-yl)propan-1-amine **6a**.

Following the general procedure, compound **6a** was obtained as a white solid in 95% yield.  $^1\text{H}$  NMR (400 MHz,  $\text{CDCl}_3$ )  $\delta$  3.75 (t,  $J = 5.8$  Hz, 6H), 2.79 (t,  $J = 5.8$  Hz, 6H), 2.61 (t,  $J = 6.9$  Hz, 2H), 1.59 – 1.44 (m, 2H), 0.44 – 0.34 (m, 2H).  $^{13}\text{C}$ -NMR (101 MHz,  $\text{CDCl}_3$ )  $\delta$  57.9, 51.3, 45.6, 29.8, 13.1. IR(solid)  $\nu_{\text{max}}$  3355, 3287, 2921, 2876, 2857, 1276, 1118, 716, 612  $\text{cm}^{-1}$ . HRMS (ESI) (m/z):  $[\text{M}]^+$  calcd. for  $\text{C}_9\text{H}_{20}\text{N}_2\text{O}_3\text{Si}$ , 232.1243; found, 232.1247. m.p.: 80-81  $^\circ\text{C}$ .

#### 11-(2,8,9-Trioxa-5-aza-1-silabicyclo[3.3.3]undecan-1-yl)undecan-1-amine **6b**.

Following the general procedure, compound **6b** was obtained as a white solid in 95% yield. <sup>1</sup>H NMR (400 MHz, CDCl<sub>3</sub>) δ 3.76 (t, *J* = 5.8 Hz, 6H), 2.79 (t, *J* = 5.8 Hz, 6H), 2.67 (t, *J* = 7.0 Hz, 2H), 1.56 – 1.10 (m, 20H), 0.51 – 0.32 (m, 2H). <sup>13</sup>C-NMR (101 MHz, CDCl<sub>3</sub>) δ 58.1, 51.4, 42.5, 34.2, 29.9, 29.7, 27.1, 25.2, 16.6. IR(solid) ν<sub>max</sub> 2919, 2851, 1567, 1466, 1088, 1026, 687 cm<sup>-1</sup>. HRMS (ESI) (*m/z*): [*M*]<sup>+</sup> calcd. for C<sub>17</sub>H<sub>36</sub>N<sub>2</sub>O<sub>3</sub>Si, 344.2495; found, 344.2504. m.p.: 73-75 °C.

### Synthesis of compounds **7aa-7bb**.

Compounds **7aa-7bb** were obtained following a modified procedure described by Thapa et al.<sup>5</sup> (Scheme S5)

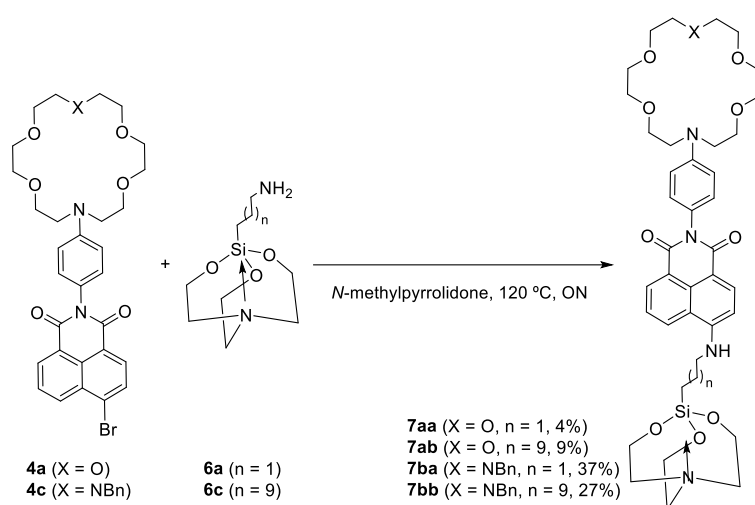

### Scheme S5. Synthesis of compounds **7aa-7bb**.

To a microwave sealable glass vial equipped with a magnetic stirrer, the corresponding naphthalimide derivative **4a** or **4c** (0.2 mmol, 1.0 equiv.), 0.25 mL of *N*-methylpyrrolidone and the corresponding silatrane derivative **6a** or **6b** (0.2 mmol, 2.0 equiv.) were added sequentially. The vial was sealed, purged with argon, heated to 120 °C in an oil bath and stirred overnight.

Purification: The reaction mixture was cooled to room temperature. The crude was dissolved in 50 mL of AcOEt and washed with Brine (3x50 mL). The organic fraction was collected, dried over MgSO<sub>4</sub>, filtered and evaporated under reduced pressure. Finally, the resulting solid was further purified by column chromatography on silica gel and a gradient of polarity from CH<sub>2</sub>Cl<sub>2</sub> to a CH<sub>2</sub>Cl<sub>2</sub>:MeOH mixture (9:1), affording the corresponding final adducts **7aa-7bb**.

**2-(4-(1,4,7,10,13-Pentaoxa-16-azacyclooctadecan-16-yl)phenyl)-6-((3-(2,8,9-trioxa-5-aza-1-silabicyclo[3.3.3]undecan-1-yl)propyl)amino)-1*H*-benzo[*de*]isoquinoline-1,3(2*H*)-dione **7aa**.**

Following the general procedure, compound **7aa** was obtained as a yellow solid in 4% yield. <sup>1</sup>H NMR (400 MHz, CDCl<sub>3</sub>) δ 8.58 (dd, *J* = 7.4, 1.1 Hz, 1H), 8.46 (d, *J* = 8.5 Hz, 1H), 8.16 (dd, *J* = 8.5, 1.1 Hz, 1H), 7.57 (dd, *J* = 8.4, 7.3 Hz, 1H), 7.11 (d, *J* = 8.9 Hz, 2H), 6.77 (d, *J* = 9.3 Hz, 2H), 6.73 (d, *J* = 8.6 Hz, 1H), 5.96 (s, 1H), 3.81 (t, *J* = 5.8 Hz, 6H), 3.77 – 3.59 (m, 24H), 3.51 – 3.29 (m, 2H), 2.85 (t, *J* = 5.8 Hz, 6H), 1.93 (p, *J* = 6.6 Hz, 2H), 0.61 (t, *J* = 7.6 Hz, 2H). <sup>13</sup>C NMR (101 MHz, CDCl<sub>3</sub>) δ 165.6, 164.9, 150.5, 147.7, 135.2, 131.4, 130.5, 129.4, 128.4, 126.6, 124.2, 123.5, 120.5, 112.0, 109.5, 104.3, 71.0, 70.9, 70.8, 68.8, 57.8, 51.7, 51.2, 46.5, 29.8, 23.8, 13.3. IR(solid)  $\nu_{\max}$  3359, 2865, 1688, 1645, 1574, 1516, 1385, 1093, 756 cm<sup>-1</sup>. HRMS (ESI) (*m/z*): [M]<sup>+</sup> calcd. for C<sub>39</sub>H<sub>52</sub>N<sub>4</sub>O<sub>10</sub>Si, 764.3453; found, 764.3443. m.p.: 91-94 °C.

**2-(4-(1,4,7,10,13-Pentaoxa-16-azacyclooctadecan-16-yl)phenyl)-6-((11-(2,8,9-trioxa-5-aza-1-silabicyclo[3.3.3]undecan-1-yl)undecyl)amino)-1*H*-benzo[*de*]isoquinoline-1,3(2*H*)-dione **7ab**.**

Following the general procedure, compound **7ab** was obtained as a yellow solid in 9% yield. <sup>1</sup>H NMR (500 MHz, CDCl<sub>3</sub>) δ 8.61 (dd, *J* = 7.3, 1.1 Hz, 1H), 8.50 (d, *J* = 8.4 Hz, 1H), 8.11 (dd, *J* = 8.6, 1.1 Hz, 1H), 7.64 (dd, *J* = 8.5, 7.2 Hz, 1H), 7.11 (d, *J* = 9.0 Hz, 2H), 6.77 (d, *J* = 9.2 Hz, 2H), 6.74 (d, *J* = 8.5 Hz, 1H), 5.26 (t, *J* = 10.2 Hz, 1H), 3.82 – 3.61 (m, 30H), 3.49 – 3.32 (m, 2H), 2.79 (t, *J* = 5.8 Hz, 6H), 1.81 (p, *J* = 7.6 Hz, 2H), 1.49 (p, *J* = 6.9 Hz, 2H), 1.40 – 1.24 (m, 14H), 0.50 – 0.36 (m, 2H). <sup>13</sup>C NMR (126 MHz, CDCl<sub>3</sub>) δ 165.5, 164.9, 149.7, 147.7, 135.0, 131.6, 130.4, 129.3, 126.0, 124.8, 124.1, 123.7, 120.4, 112.0, 110.6, 104.5, 71.1, 71.0, 70.9, 68.8, 58.1, 51.7, 51.3, 43.9, 34.1, 29.7, 29.7, 29.6, 29.6, 29.5, 29.2, 27.3, 25.2, 16.6. IR(solid)  $\nu_{\max}$  2920, 2853, 1654, 1578, 1518, 1357, 1100, 775 cm<sup>-1</sup>. HRMS (ESI) (*m/z*): [M]<sup>+</sup> calcd. for C<sub>47</sub>H<sub>68</sub>N<sub>4</sub>O<sub>10</sub>Si, 876.4705; found, 876.4693. 95-100 °C (dec.).

**6-((3-(2,8,9-Trioxa-5-aza-1-silabicyclo[3.3.3]undecan-1-yl)propyl)amino)-2-(4-(16-benzyl-1,4,10,13-tetraoxa-7,16-diazacyclooctadecan-7-yl)phenyl)-1*H*-benzo[*de*]isoquinoline-1,3(2*H*)-dione **7ba**.**

Following the general procedure, compound **7ba** was obtained as a yellow solid in 37% yield. <sup>1</sup>H NMR (400 MHz, CDCl<sub>3</sub>) δ 8.59 (dd, *J* = 7.3, 1.1 Hz, 1H), 8.46 (d, *J* = 8.4 Hz, 1H), 8.16 (dd, *J* = 8.5, 1.3 Hz, 1H), 7.57 (dd, *J* = 8.4, 7.3 Hz, 1H), 7.43 – 7.23 (m, 5H), 7.11 (d, *J* = 9.0 Hz, 2H), 6.76 (d, *J* = 9.1 Hz, 2H), 6.73 (d, *J* = 8.6 Hz, 1H), 5.97 (t, *J* = 4.8 Hz, 1H), 3.81 (t, *J* = 5.9 Hz, 6H), 3.77 – 3.55 (m, 22H), 3.40 (td, *J* = 6.7, 4.9 Hz, 2H), 2.85 (t, *J* = 5.8 Hz, 10H), 2.03 – 1.82 (m, 2H), 0.61 (t, *J* = 7.6 Hz, 2H). <sup>13</sup>C-NMR (101 MHz, CDCl<sub>3</sub>) δ 165.6, 164.9, 150.5, 147.7, 135.2, 131.4, 130.5, 129.4, 128.4, 127.2, 126.6, 124.4, 124.2, 123.5, 120.5, 111.9, 109.4, 104.3, 71.1, 70.7, 69.8, 69.0, 59.8, 57.8, 53.7, 51.6, 51.1, 46.5, 23.8, 13.3. IR(solid)  $\nu_{\max}$  3321, 2870, 1638, 1577, 1518, 1360, 1094, 773. cm<sup>-1</sup>. HRMS (ESI) (*m/z*): [M]<sup>+</sup> calcd. for C<sub>46</sub>H<sub>59</sub>N<sub>5</sub>O<sub>9</sub>Si, 853.4082; found, 853.4084. m.p.: 95-100 °C (dec.).



**6-((11-(2,8,9-Trioxa-5-aza-1-silabicyclo[3.3.3]undecan-1-yl)undecyl)amino)-2-(4-(16-benzyl-1,4,10,13-tetraoxa-7,16-diazacyclooctadecan-7-yl)phenyl)-1*H*-benzo[*de*]isoquinoline-1,3(2*H*)-dione 7bb.**

Following the general procedure, compound **7bb** was obtained as a yellow solid in 27% yield. <sup>1</sup>H NMR (400 MHz, CDCl<sub>3</sub>) δ 8.61 (d, *J* = 7.3 Hz, 1H), 8.50 (d, *J* = 8.4 Hz, 1H), 8.12 (d, *J* = 8.5 Hz, 1H), 7.64 (t, *J* = 7.9 Hz, 2H), 7.47 – 7.19 (m, 5H), 7.11 (d, *J* = 8.9 Hz, 2H), 6.88 – 6.64 (m, 3H), 5.29 (t, *J* = 5.3 Hz, 1H), 3.85 – 3.53 (m, 22H), 3.49 – 3.32 (m, 2H), 2.87 (s, 4H), 2.79 (t, *J* = 5.8 Hz, 6H), 1.80 (q, *J* = 7.4 Hz, 2H), 1.47 – 1.24 (m, 16H), 0.54 – 0.31 (m, 2H). <sup>13</sup>C-NMR (101 MHz, CDCl<sub>3</sub>) δ 165.5, 164.9, 149.7, 147.8, 135.0, 131.6, 130.4, 129.4, 129.2, 128.4, 127.1, 126.1, 124.8, 124.2, 123.7, 120.4, 111.9, 110.6, 104.5, 71.1, 70.8, 69.0, 58.1, 53.8, 51.6, 51.3, 43.9, 34.1, 29.8, 29.7, 29.7, 29.6, 29.5, 29.2, 27.3, 25.2, 16.6. IR(solid)  $\nu_{\max}$  3361, 2921, 2853, 1688, 1646, 1576, 1518, 1357, 1100, 727. cm<sup>-1</sup>. HRMS (ESI) (*m/z*): [M]<sup>+</sup> calcd. for C<sub>54</sub>H<sub>75</sub>N<sub>5</sub>O<sub>9</sub>Si, 965.5334; found, 965.5342. m.p.: 95-100 °C (dec.).

**Synthesis of compounds 8a and 8b.**

Compounds **8a** and **8b** were obtained following a modified procedure described by Buchwald & Zhang.<sup>7</sup> (Scheme S6) Spectral data for compound **8a** are consistent with the previously reported values.<sup>8</sup>

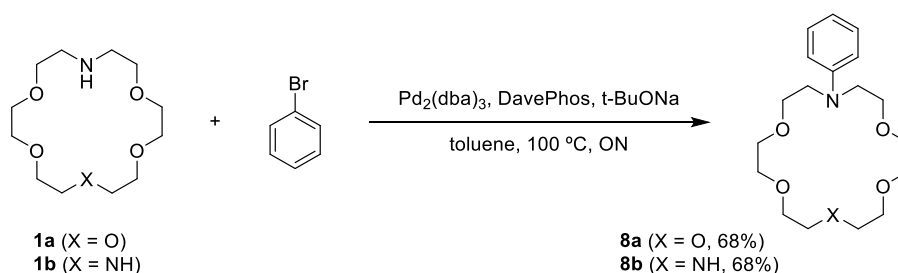

**Scheme S6.** Synthesis of compounds **8a** and **8b**.

To a round bottom flask equipped with a magnetic stirrer, Pd<sub>2</sub>(dba)<sub>3</sub> (232.6 mg, 0.254 mmol, 0.02 equiv.), DavePhos (300.8 mg, 0.764 mmol, 0.06 equiv.), the corresponding crown ether **1** (12.74 mmol, 1.0 equiv.), t-BuONa (1836.5 mg, 19.11 mmol, 1.5 equiv.), 100 mL of toluene and Bromobenzene (1333 μL, 12.74 mmol, 1.5 equiv.) were added sequentially. The mixture was heated to 100 °C in an oil bath and stirred overnight.

Purification: The reaction mixture was cooled to room temperature, filtered through a celite pad and the solvent was removed under reduced pressure. The crude was then dissolved in 50 mL of

AcOEt and washed with Na<sub>2</sub>CO<sub>3</sub> (sat.) (3x50 mL) and Brine (3x50 mL). The organic fraction was collected, dried over MgSO<sub>4</sub>, filtered and evaporated under reduced pressure, affording the corresponding final adducts **8a** and **8b**.

#### ***N*-Phenyl-1-aza-18-crown-6 **8a**.**

Following the general procedure, compound **8a** was obtained as a brown oil in 68% yield. <sup>1</sup>H NMR (400 MHz, CDCl<sub>3</sub>) δ 7.20 (dd, *J* = 8.8, 7.2 Hz, 2H), 6.72 – 6.61 (m, 3H), 3.74 – 3.57 (m, 24H).

#### ***N*-Phenyl-1,10-diaza-18-crown-6 **8b**.**

Following the general procedure, compound **8b** was obtained as a brown oil in 68% yield. <sup>1</sup>H NMR (400 MHz, CDCl<sub>3</sub>) δ 7.25 – 7.12 (m, 2H), 6.76 – 6.58 (m, 3H), 3.75 – 3.55 (m, 22H), 2.98 (s, 1H), 2.86 – 2.74 (m, 4H). <sup>13</sup>C-NMR (101 MHz, CDCl<sub>3</sub>) δ 148.02, 129.38, 116.11, 111.92, 70.65, 70.51, 70.37, 68.87, 50.81, 49.38. IR(solid) ν<sub>max</sub> 2865, 1597, 1505, 1350, 1107, 908, 725. cm<sup>-1</sup>. HRMS (ESI) (*m/z*): [M+H<sup>+</sup>] calcd. for C<sub>18</sub>H<sub>31</sub>N<sub>2</sub>O<sub>4</sub>, 339.2278; found, 339.2273.

### **Synthesis of compounds **9a** and **9b**.**

Compounds **9a** and **9b** were obtained following a modified procedure described by Das et al.<sup>9</sup> (Scheme S7)

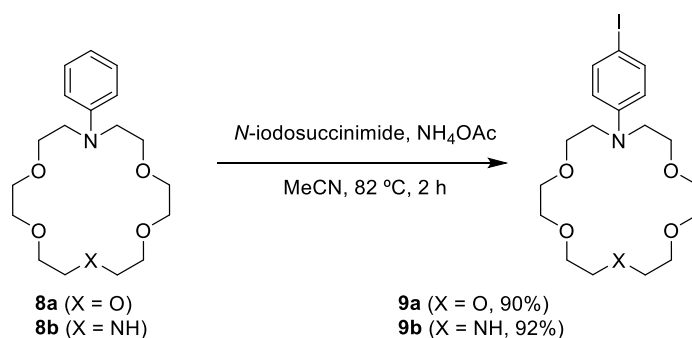

#### **Scheme S7. Synthesis of compounds **9a** and **9b**.**

To a round bottom flask equipped with a magnetic stirrer, the corresponding crown ether derivative **8** (8.00 mmol, 1.0 equiv.), NH<sub>4</sub>OAc (61.7 mg, 0.800 mmol, 0.1 equiv.), 100 mL of MeCN and *N*-iodosuccinimide (1889.9 mg, 8.40 mmol, 1.05 equiv.) were added sequentially. The reaction was heated in an oil bath to 82 °C and stirred for 2 h.

Purification: The reaction mixture was cooled to room temperature and washed with Na<sub>2</sub>CO<sub>3</sub> (sat.) (3x100 mL) and Brine (3x100 mL). The organic fraction was collected, dried over MgSO<sub>4</sub>, filtered and evaporated under reduced pressure, affording the corresponding final adducts **9a** and **9b**.

#### ***N*-(4-iodophenyl)-1-aza-18-crown-6 **9a**.**

Following the general procedure, compound **9a** was obtained as a black oil in 90% yield. <sup>1</sup>H NMR (400 MHz, CDCl<sub>3</sub>) δ 7.46 – 7.37 (m, 2H), 6.51 – 6.43 (m, 2H), 3.71 – 3.53 (m, 24H). <sup>13</sup>C-NMR (101 MHz, CDCl<sub>3</sub>) δ 147.6, 137.8, 114.2, 76.5, 71.0, 68.6, 51.4. IR(solid) ν<sub>max</sub> 2974, 2866, 1765, 1602, 1354, 1109, 813, 654 cm<sup>-1</sup>. HRMS (ESI) (m/z): [M]<sup>+</sup> calcd. for C<sub>18</sub>H<sub>28</sub>INO<sub>5</sub>, 465.1012; found, 465.1010.

#### ***N*-(4-iodophenyl)-1,10-diaza-18-crown-6 **9b**.**

Following the general procedure, compound **9b** was obtained as a black oil in 92% yield. <sup>1</sup>H NMR (400 MHz, CDCl<sub>3</sub>) δ 7.47 – 7.34 (m, 2H), 6.53 – 6.38 (m, 2H), 3.73 – 3.50 (m, 22H), 2.87 – 2.76 (m, 4H), 2.45 (s, 1H). <sup>13</sup>C-NMR (101 MHz, CDCl<sub>3</sub>) δ 147.7, 137.9, 114.2, 76.7, 70.7, 70.6, 70.5, 68.6, 50.8, 49.4. IR(solid) ν<sub>max</sub> 2866, 1586, 1495, 1107, 907, 725. cm<sup>-1</sup>. HRMS (ESI) (m/z): [M]<sup>+</sup> calcd. for C<sub>18</sub>H<sub>29</sub>IN<sub>2</sub>O<sub>4</sub>, 464.1172; found, 464.1165.

#### **Synthesis of compound **9c**.**

Compound **9c** was obtained following a modified procedure described by Thapa et al.<sup>5</sup> (**Scheme S8**)

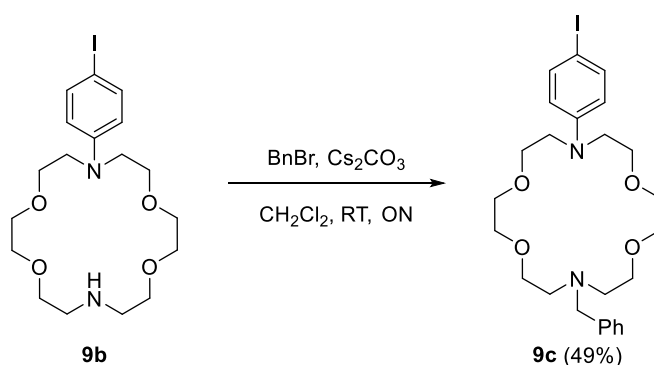

**Scheme S8.** Synthesis of compound **9c**.

To a microwave sealable glass vial equipped with a magnetic stirrer, *N*-(4-iodophenyl)-1,10-diaza-18-crown-6 **9b** (341.7 mg, 0.736 mmol, 1.0 equiv.), Cs<sub>2</sub>CO<sub>3</sub> (239.8 mg, 0.736 mmol, 1.0

equiv.) and 7.5 mL of CH<sub>2</sub>Cl<sub>2</sub> were added sequentially. The vial was sealed, purged with argon and benzyl bromide (87.5 μL, 0.736 mmol, 1.0 equiv.) was added dropwise to the mixture. The reaction was stirred at room temperature overnight.

Purification: The reaction mixture was cooled to room temperature and the solvent was removed under reduced pressure. The crude was further purified by column chromatography on silica gel and a gradient of polarity from CH<sub>2</sub>Cl<sub>2</sub> to a CH<sub>2</sub>Cl<sub>2</sub>:EtOAc mixture (1:1), affording the corresponding final adduct **9c**.

#### 7-Benzyl-16-(4-iodophenyl)-1,4,10,13-tetraoxa-7,16-diazacyclooctadecane **9c**.

Following the general procedure, compound **9c** was obtained as a pale yellow oil in 49% yield. <sup>1</sup>H NMR (400 MHz, CDCl<sub>3</sub>) δ 7.50 – 7.38 (m, 2H), 7.38 – 7.13 (m, 5H), 6.54 – 6.38 (m, 2H), 3.71 – 3.53 (m, 22H), 2.81 (t, *J* = 5.9 Hz, 4H). <sup>13</sup>C-NMR (101 MHz, CDCl<sub>3</sub>) δ 163.5, 147.6, 139.7, 137.9, 129.0, 128.3, 127.0, 114.2, 71.2, 70.8, 70.3, 68.8, 60.0, 53.9, 51.4. IR(solid) ν<sub>max</sub> 2861, 1585, 1494, 1350, 1110, 802, 733, 698. cm<sup>-1</sup>. HRMS (ESI) (*m/z*): [*M*]<sup>+</sup> calcd. for C<sub>25</sub>H<sub>35</sub>IN<sub>2</sub>O<sub>4</sub>, 554.1642; found, 554.1633.

#### Synthesis of compounds **10a** and **10b**.

Compounds **10a** and **10b** were obtained following a modified procedure described by Ishiyama et al.<sup>10</sup> (Scheme S9)

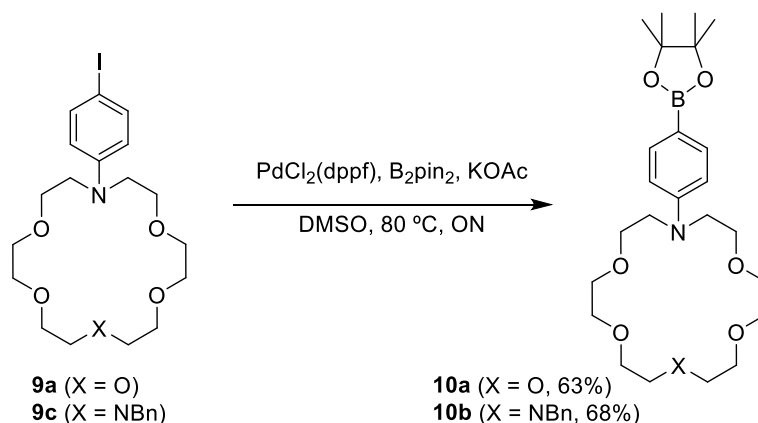

#### Scheme S9. Synthesis of compounds **10a** and **10b**.

To a microwave sealable glass vial equipped with a magnetic stirrer, PdCl<sub>2</sub>(dppf) (22.0 mg, 0.03 mmol, 0.03 equiv.), bis(pinacolato)diboron (279.3 mg, 1.00 mmol, 1.1 equiv.), KOAc (294.42 mg, 3.00 mmol, 3.0 equiv.), 6.0 mL of DMSO and the corresponding crown ether derivative **9**

(1.0 mmol, 1.0 equiv.) were added sequentially. The vial was sealed, purged with argon and stirred at 80 °C overnight.

Purification: The reaction crude was cooled to room temperature, 50 mL of brine were added and the mixture was extracted with Et<sub>2</sub>O (3x50 mL). The combined organic fractions were washed with Na<sub>2</sub>CO<sub>3</sub> (sat.) (3x150 mL), NH<sub>4</sub>Cl (sat.) (3x150 mL) and Brine (3x150 mL). Then, the organic fraction was collected, dried over MgSO<sub>4</sub> and filtered. Compound **10b** is used in the next step without further purification. Finally, the resulting oil was further purified by column chromatography on silica gel with a mixture of n-hexane:EtOAc and a gradient of polarity from (6:4) to pure EtOAc, affording the corresponding final adduct **10a**.

#### ***N*-[4-(4,4,5,5-tetramethyl-1,3,2-dioxaborolan-2-yl)phenyl]-1-aza-18-crown-6 **10a**.**

Following the general procedure, compound **10a** was obtained as a pale yellow oil in 63% yield. <sup>1</sup>H NMR (500 MHz, CDCl<sub>3</sub>) δ 7.67 – 7.61 (m, 2H), 6.67 – 6.62 (m, 2H), 3.71 – 3.62 (m, 24H), 1.30 (s, 12H). <sup>13</sup>C-NMR (101 MHz, CDCl<sub>3</sub>) δ 150.2, 136.5, 114.7, 110.8, 83.3, 70.9, 68.7, 51.3, 25.0. IR(solid) ν<sub>max</sub> 3055, 2857, 1585, 1494, 1349, 1110, 803, 700 cm<sup>-1</sup>. HRMS (ESI) (m/z): [M+H]<sup>+</sup> calcd. for C<sub>24</sub>H<sub>41</sub>BNO<sub>7</sub>, 466.2976; found, 466.2979.

#### **7-Benzyl-16-(4-(4,4,5,5-tetramethyl-1,3,2-dioxaborolan-2-yl)phenyl)-1,4,10,13-tetraoxa-7,16-diazacyclooctadecane **10b**.**

Following the general procedure, compound **10b** was obtained as a pale yellow oil in 63% yield (calculated from <sup>1</sup>H NMR, as the product comes with an inseparable impurity, assigned as the dehalogenation product from **9c**). <sup>1</sup>H NMR (400 MHz, CDCl<sub>3</sub>) δ 7.65 (d, *J* = 8.7 Hz, 2H), 7.54 – 7.06 (m, 5H), 6.65 (d, *J* = 8.7 Hz, 2H), 3.88 – 3.47 (m, 22H), 2.82 (t, *J* = 5.9 Hz, 4H), 1.32 (s, 12H). HRMS (ESI) (m/z): [M+H]<sup>+</sup> calcd. for C<sub>31</sub>H<sub>48</sub>BN<sub>2</sub>O<sub>6</sub>, 555.3605; found, 555.3599.

#### **Synthesis of compound **12a**.**

Methyl 2-chloroimidazo[1,2-*a*]pyridine-7-carboxylate **12a** was obtained following a procedure described by Byun et al.<sup>11</sup> (**Scheme S10**) Spectral data for compound **12a** is consistent with the previously reported values.<sup>11</sup>

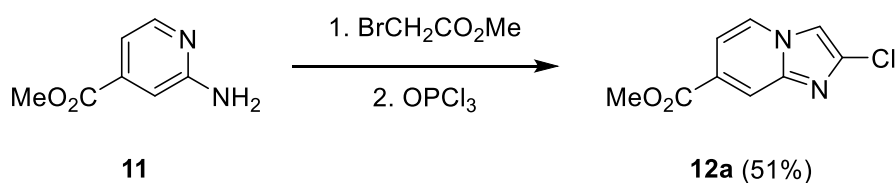

### Scheme S10. Synthesis of compound **12a**.

#### Methyl 2-chloroimidazo[1,2-*a*]pyridine-7-carboxylate **12a**.

Following the reported procedure, compound **12a** was obtained as a white solid in 51% yield. <sup>1</sup>H NMR (400 MHz, CDCl<sub>3</sub>) δ 8.31 – 8.21 (m, 1H), 8.09 (dd, *J* = 7.1, 1.0 Hz, 1H), 7.61 (d, *J* = 0.7 Hz, 1H), 7.46 (dd, *J* = 7.1, 1.7 Hz, 1H), 3.97 (s, 3H).

#### Synthesis of compound **12b**.

Methyl 2-iodoimidazo[1,2-*a*]pyridine-7-carboxylate **12b** was obtained following a modified procedure described by Claiborne et al.<sup>11</sup> (Scheme S11)

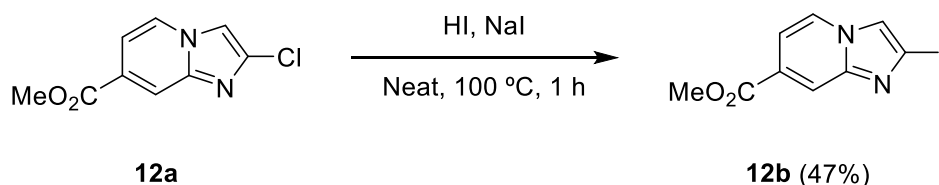

### Scheme S11. Synthesis of compound **12b**.

To a microwave sealable glass vial equipped with a magnetic stirrer, methyl 2-chloroimidazo[1,2-*a*]pyridine-7-carboxylate **12a** (105.3 mg, 0.5 mmol, 1.0 equiv.), hydriodic acid 57% (1.7 mL, 12.5 mmol, 25.0 equiv.) and NaI (374.7 mg, 2.5 mmol, 5.0 equiv.) were added sequentially. The vial was sealed and stirred at 100 °C for 1 h.

Purification: The reaction crude was cooled to room temperature and poured slowly over 50 mL of Na<sub>2</sub>CO<sub>3</sub> (sat.). The aqueous solution was then extracted with EtOAc (3x50 mL) and the combined organic fractions were washed with Brine (3x150 mL). The organic fraction was collected, dried over MgSO<sub>4</sub>, filtered and evaporated under reduced pressure, affording the corresponding final adduct **12b**.

#### Methyl 2-iodoimidazo[1,2-*a*]pyridine-7-carboxylate **12b**.

Following the general procedure, compound **12b** was obtained as a brown solid in 47% yield. <sup>1</sup>H NMR (400 MHz, CDCl<sub>3</sub>) δ 8.32 – 8.24 (m, 1H), 8.11 (dd, *J* = 7.0, 1.0 Hz, 1H), 7.78 (d, *J* = 0.7 Hz, 1H), 7.41 (dd, *J* = 7.1, 1.7 Hz, 1H), 3.96 (s, 3H). <sup>13</sup>C-NMR (101 MHz, CDCl<sub>3</sub>) δ 165.4, 145.9, 126.7, 124.2, 119.5, 119.3, 112.4, 93.5, 52.9. IR(solid)  $\nu_{\max}$  3139, 2950, 1703, 1430, 1346, 1308, 1267, 1242, 736. cm<sup>-1</sup>. HRMS (ESI) (*m/z*): [M]<sup>+</sup> calcd. for C<sub>9</sub>H<sub>7</sub>IN<sub>2</sub>O<sub>2</sub>, 301.9552; found, 301.9548. m.p.: 189-191 °C.

### Synthesis of compound 13.

Methyl 1-iodobenzo[*a*]imidazo[5,1,2-*cd*]indolizine-4-carboxylate **13** was obtained following a modified procedure described by Semwal et al.<sup>13</sup> (Scheme S12)

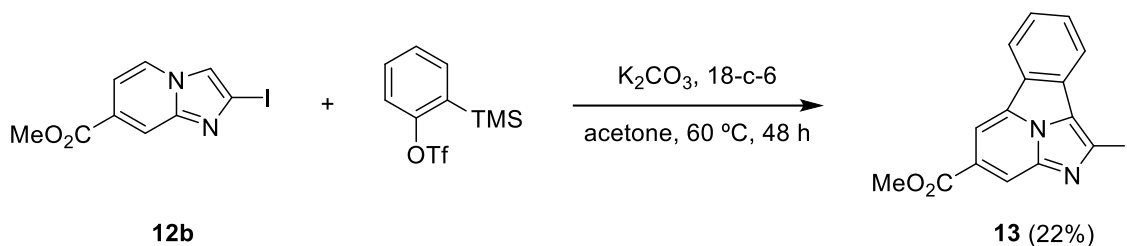

### Scheme S12. Synthesis of compound 13.

To a microwave sealable glass vial equipped with a magnetic stirrer, methyl 2-iodoimidazo[1,2-*a*]pyridine-7-carboxylate **12b** (30.2 mg, 0.1 mmol, 1.0 equiv.),  $K_2CO_3$  (27.6 mg, 0.2 mmol, 2.0 equiv.), 18-Crown-6 (52.9 mg, 0.2 mmol, 2.0 equiv.), 1.0 mL of acetone and 2-(trimethylsilyl)phenyl trifluoromethanesulfonate (49  $\mu$ L, 0.2 mmol, 2.0 equiv.) were added sequentially. The vial was sealed and stirred at 60 °C for 48 h.

Purification: The reaction crude was cooled to room temperature and the solvent was removed under reduced pressure. The solid was dissolved in 50 mL of EtOAc and washed with Brine (3x50 mL). Then, the organic fraction was collected, dried over  $MgSO_4$ , filtered and evaporated under reduced pressure. Finally, the resulting solid was further purified by column chromatography on silica gel with a mixture of n-hexane:acetone and a gradient of polarity from (9.5:0.5) to (8:2), affording the corresponding final adduct **13**.

### Methyl 1-iodobenzo[*a*]imidazo[5,1,2-*cd*]indolizine-4-carboxylate 13.

Following the general procedure, compound **13** was obtained as a brown solid in 22% yield.  $^1H$  NMR (400 MHz,  $CDCl_3$ )  $\delta$  8.72 (dd,  $J = 11.4, 0.8$  Hz, 2H), 8.45 – 8.32 (m, 2H), 7.83 (ddd,  $J = 8.1, 7.4, 1.2$  Hz, 1H), 7.70 (ddd,  $J = 8.5, 7.4, 1.1$  Hz, 1H), 4.10 (s, 3H).  $^{13}C$ -NMR (101 MHz,  $CDCl_3$ )  $\delta$  166.5, 140.7, 131.7, 130.0, 129.2, 128.9, 128.6, 126.3, 123.5, 120.3, 116.2, 114.7, 110.0, 92.4, 53.2. IR(solid)  $\nu_{max}$  2955, 1714, 1232, 764, 731  $cm^{-1}$ . HRMS (ESI) (m/z):  $[M]^+$  calcd. for  $C_{15}H_9IN_2$ , 375.9709; found, 375.9706. m.p.: 148-151 °C.

### Synthesis of compounds 14a and 14b.

Compounds **14a** and **14b** were obtained following a modified procedure described by Lévesque et al.<sup>14</sup> (**Scheme S13**)

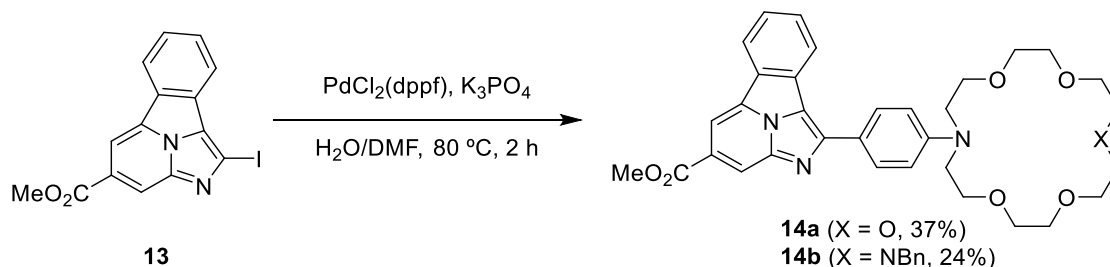

**Scheme S13.** Synthesis of compounds **14a** and **14b**.

To a microwave sealable glass vial equipped with a magnetic stirrer, PdCl<sub>2</sub>(dppf) (3.7 mg, 0.005 mmol, 0.05 equiv.), the corresponding crown ether derivative **10** (0.1 mmol, 1.0 equiv.), K<sub>3</sub>PO<sub>4</sub> (84.9 mg, 0.4 mmol, 4.0 equiv.), 1 mL of a mixture of DMF and H<sub>2</sub>O (83:17) and methyl 1-iodobenzo[*a*]imidazo[5,1,2-*cd*]indolizine-4-carboxylate **13** (37.6 mg, 0.1 mmol, 1.0 equiv.) were added sequentially. The vial was sealed, heated to 80 °C in an oil bath and stirred for 2 h.

Purification: The reaction crude was cooled to room temperature and the solvent was removed under reduced pressure. The solid was dissolved in 50 mL of EtOAc and washed with Na<sub>2</sub>CO<sub>3</sub> (3x50 mL) and Brine (3x50 mL). Then, the organic fraction was collected, dried over MgSO<sub>4</sub>, filtered and evaporated under reduced pressure. Finally, the resulting solid was further purified by column chromatography on silica gel with a mixture of EtOAc:MeOH and a gradient of polarity from pure EtOAc to (96:4), affording the corresponding final adducts **14a** and **14b**.

**Methyl 1-(4-(1,4,7,10,13-pentaoxa-16-azacyclooctadecan-16-yl)phenyl)benzo[*a*]imidazo[5,1,2-*cd*]indolizine-4-carboxylate **14a**.**

Following the general procedure, compound **14a** was obtained as a yellow oil in 37% yield. <sup>1</sup>H NMR (500 MHz, CDCl<sub>3</sub>) δ 8.71 (d, *J* = 7.0 Hz, 1H), 8.47 (dd, *J* = 15.8, 8.0 Hz, 2H), 8.29 (d, *J* = 8.9 Hz, 2H), 7.85 – 7.78 (m, 1H), 7.65 (t, *J* = 7.6 Hz, 1H), 6.95 (d, *J* = 8.9 Hz, 2H), 4.09 (s, 3H), 3.84 – 3.74 (m, 8H), 3.70 (d, *J* = 5.4 Hz, 16H). <sup>13</sup>C-NMR (126 MHz, CDCl<sub>3</sub>) δ 167.2, 150.5, 149.2, 139.1, 131.7, 130.0, 129.4, 129.4, 128.9, 127.5, 125.1, 123.4, 121.6, 121.3, 121.2, 113.6, 112.1, 109.0, 71.1, 71.0, 70.9, 70.8, 68.8, 52.9, 51.6. IR(solid) ν<sub>max</sub> 3404, 2911, 2869, 1714, 1647, 1602, 1113, 1092, 749 cm<sup>-1</sup>. HRMS (ESI) (*m/z*): [M]<sup>+</sup> calcd. for C<sub>33</sub>H<sub>37</sub>N<sub>3</sub>O<sub>7</sub>, 587.2632; found, 587.2627.

**Methyl 1-(4-(16-benzyl-1,4,10,13-tetraoxa-7,16-diazacyclooctadecan-7-yl)phenyl)benzo[*a*]imidazo[5,1,2-*cd*]indolizine-4-carboxylate **14b**.**



Following the general procedure, compound **14b** was obtained as a yellow oil in 24% yield.  $^1\text{H}$  NMR (400 MHz,  $\text{CDCl}_3$ )  $\delta$  8.72 (dd,  $J = 6.9, 0.9$  Hz, 2H), 8.58 – 8.40 (m, 2H), 8.30 (d,  $J = 8.9$  Hz, 2H), 7.82 (ddd,  $J = 8.2, 7.2, 1.1$  Hz, 1H), 7.66 (ddd,  $J = 8.1, 7.2, 1.0$  Hz, 1H), 7.41 – 7.27 (m, 5H), 6.94 (d,  $J = 9.0$  Hz, 2H), 4.09 (s, 3H), 3.82 – 3.58 (m, 22H), 2.84 (s, 4H).  $^{13}\text{C}$ -NMR (101 MHz,  $\text{CDCl}_3$ )  $\delta$  167.2, 150.5, 149.3, 139.8, 132.1, 131.7, 130.1, 129.4, 129.3, 129.1, 128.9, 128.4, 127.8, 127.5, 127.2, 127.1, 125.1, 123.4, 121.2, 113.6, 112.0, 109.0, 71.2, 70.8, 70.3, 69.0, 60.0, 53.9, 53.0, 51.6. IR(solid)  $\nu_{\text{max}}$  2860, 1716, 1606, 1447, 1345, 1231, 1109, 732  $\text{cm}^{-1}$ . HRMS (ESI) (m/z):  $[\text{M}]^+$  calcd. for  $\text{C}_{40}\text{H}_{44}\text{N}_4\text{O}_6$ , 676.3261; found, 676.3280.

### Synthesis of compounds 15aa-bb.

Compounds **15aa-bb** were obtained after two reaction steps, being the first based on a modified procedure described by Sanchez-Sanchez et al.<sup>15</sup> and the second one based on a modified procedure described by Chinchilla et al.<sup>16</sup> (Scheme S14)

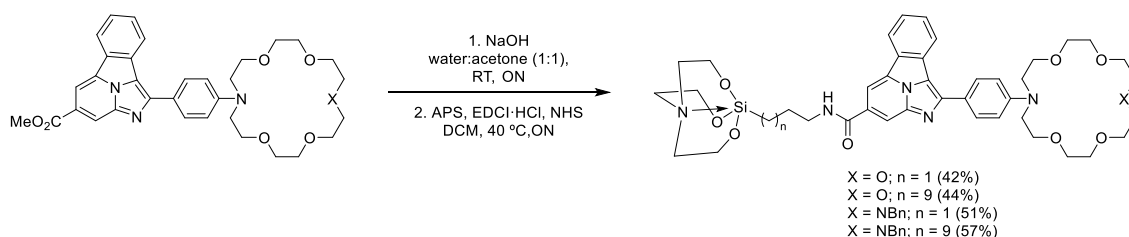

### Scheme S14. Synthesis of compounds 15aa and 15bb.

To a round bottom flask equipped with a magnetic stirrer, the corresponding ester derivative **14** (0.1 mmol, 1.0 equiv.), 5 mL of a mixture of  $\text{H}_2\text{O}$ :acetone (1:1) and NaOH (13.2 mg, 0.33 mmol, 3.3 equiv.) were added sequentially. The reaction mixture was stirred overnight.

Purification: Acetone was removed under reduced pressure. Then, 20 mL of deionized water were added and the aqueous solution was washed with  $\text{CH}_2\text{Cl}_2$  (3x20 mL) and 25 mL of a  $\text{NH}_4\text{Cl}$  saturated solution were added. The mixture was extracted  $\text{CH}_2\text{Cl}_2$  (3x50 mL), and the combined organic layers were washed with 50 mL of deionized water. Finally, the solvent was evaporated under reduced pressure, giving rise to a yellow solid, which was used directly for the next reaction without further purification.

The last reaction product was charged in a microwave sealable glass vial equipped with a magnetic stirrer. Then, EDC·HCl (57.5 mg, 0.3 mmol, 3.0 equiv.), NHS (34.5 mg, 0.3 mmol, 3.0 equiv.), the corresponding silatrane derivative **6** (0.5 mmol, 5.0 equiv.) and 10 mL of  $\text{CH}_2\text{Cl}_2$

were added sequentially. The vial was sealed, purged with argon, heated to 40 °C in an oil bath and stirred overnight.

Purification: The reaction crude was cooled to room temperature and the solvent was removed under reduced pressure. Then, the solid was purified by flash chromatography in a Biotage Isolera Four system with a Biotage Snap Cartridge KP-Sil 10g, gradient of polarity from a CH<sub>2</sub>Cl<sub>2</sub>:AcOEt mixture (1:1) to a CH<sub>2</sub>Cl<sub>2</sub>:AcOEt:MeOH mixture (45:45:10), affording the corresponding final adducts **15aa-bb**.

**1-(4-(1,4,7,10,13-Pentaoxa-16-azacyclooctadecan-16-yl)phenyl)-N-(3-(2,8,9-trioxa-5-aza-1-silabicyclo[3.3.3]undecan-1-yl)propyl)benzo[*a*]imidazo[5,1,2-*cd*]indolizine-4-carboxamide **15aa**.**

Following the general procedure, compound **15aa** was obtained as a yellow oil in 42% yield. <sup>1</sup>H NMR (500 MHz, CDCl<sub>3</sub>) δ 8.66 (d, *J* = 0.8 Hz, 1H), 8.54 – 8.37 (m, 3H), 8.22 (d, *J* = 8.8 Hz, 2H), 7.79 (ddd, *J* = 8.3, 5.3, 1.3 Hz, 2H), 7.71 – 7.59 (m, 1H), 6.94 (d, *J* = 8.8 Hz, 2H), 3.85 – 3.66 (m, 24H), 3.58 (q, *J* = 6.1 Hz, 2H), 2.82 (t, *J* = 5.8 Hz, 6H), 1.85 (p, *J* = 7.1 Hz, 2H), 0.62 (t, *J* = 7.3 Hz, 2H). <sup>13</sup>C-NMR (126 MHz, CDCl<sub>3</sub>) δ 167.0, 149.3, 138.2, 135.0, 131.7, 130.1, 129.6, 129.6, 129.5, 125.4, 123.7, 121.1, 120.5, 120.2, 112.1, 109.6, 109.0, 71.1, 71.0, 70.9, 70.8, 68.8, 57.8, 51.6, 51.1, 43.6, 23.7, 13.3. IR(solid) ν<sub>max</sub> 2915, 2866, 1708, 1603, 1459, 1347, 1209, 1097, 765. cm<sup>-1</sup>. HRMS (ESI) (*m/z*): [M+H<sup>+</sup>] calcd. for C<sub>41</sub>H<sub>54</sub>N<sub>5</sub>O<sub>9</sub>Si, 788.3691; found, 788.3697.

**1-(4-(1,4,7,10,13-Pentaoxa-16-azacyclooctadecan-16-yl)phenyl)-N-(11-(2,8,9-trioxa-5-aza-1-silabicyclo[3.3.3]undecan-1-yl)undecyl)benzo[*a*]imidazo[5,1,2-*cd*]indolizine-4-carboxamide **15ab**.**

Following the general procedure, compound **15ab** was obtained as a yellow oil in 44% yield. <sup>1</sup>H NMR (500 MHz, CDCl<sub>3</sub>) δ 8.53 (s, 1H), 8.46 (dd, *J* = 14.3, 8.1 Hz, 2H), 8.36 – 8.19 (m, 3H), 7.81 (t, *J* = 7.6 Hz, 1H), 7.64 (t, *J* = 7.6 Hz, 1H), 6.94 (d, *J* = 8.6 Hz, 2H), 6.41 (d, *J* = 5.1 Hz, 1H), 3.94 – 3.61 (m, 30H), 3.58 (q, *J* = 6.7 Hz, 2H), 2.78 (t, *J* = 5.7 Hz, 6H), 1.71 (p, *J* = 7.4 Hz, 2H), 1.47 – 1.41 (m, 2H), 1.33 – 1.19 (m, 14H), 0.55 – 0.31 (m, 2H). <sup>13</sup>C-NMR (126 MHz, CDCl<sub>3</sub>) δ 167.4, 150.0, 149.1, 139.0, 133.1, 131.5, 130.0, 129.6, 129.5, 129.3, 124.9, 123.6, 121.7, 121.1, 120.7, 112.1, 109.8, 107.6, 71.0, 68.8, 58.1, 51.6, 51.3, 40.8, 34.1, 29.9, 29.8, 29.7, 29.7, 29.5, 27.3, 25.2, 16.6. IR(solid) ν<sub>max</sub> 3318, 2922, 2855, 1642, 1607, 1460, 1350, 1125, 1105, 770 cm<sup>-1</sup>. HRMS (ESI) (*m/z*): [M+H<sup>+</sup>] calcd. for C<sub>49</sub>H<sub>70</sub>N<sub>5</sub>O<sub>9</sub>Si, 900.4943; found, 900.4938.

**N-(3-(2,8,9-trioxa-5-aza-1-silabicyclo[3.3.3]undecan-1-yl)propyl)-1-(4-(16-benzyl-1,4,10,13-tetraoxa-7,16-diazacyclooctadecan-7-yl)phenyl)benzo[*a*]imidazo[5,1,2-*cd*]indolizine-4-carboxamide **15ba**.**

Following the general procedure, compound **15ba** was obtained as a yellow oil in 51% yield. <sup>1</sup>H NMR (400 MHz, CDCl<sub>3</sub>) δ 8.61 (s, 1H), 8.44 (dd, *J* = 8.1, 4.6 Hz, 2H), 8.38 (s, 1H), 8.26 (d, *J* = 8.6 Hz, 2H), 7.79 (t, *J* = 7.8 Hz, 1H), 7.68 – 7.57 (m, 2H), 7.37 – 7.17 (m, 5H), 6.93 (d, *J* = 8.7 Hz, 2H), 3.85 – 3.54 (m, 30H), 2.88 (t, *J* = 5.7 Hz, 4H), 2.81 (d, *J* = 5.8 Hz, 6H), 1.85 (p, *J* = 7.0 Hz, 2H), 0.63 (t, *J* = 7.3 Hz, 2H). <sup>13</sup>C-NMR (101 MHz, CDCl<sub>3</sub>) δ 173.3, 167.2, 149.2, 149.1, 138.8, 134.4, 131.6, 130.0, 129.5, 129.4, 129.2, 128.4, 127.6, 127.2, 125.0, 123.6, 121.5, 121.0, 120.5, 112.0, 109.8, 108.3, 71.2, 70.8, 70.0, 69.0, 59.8, 57.8, 53.7, 51.5, 51.1, 43.4, 23.7, 13.2. IR(solid)  $\nu_{\max}$  2923, 1642, 1460, 1350, 1099, 769 cm<sup>-1</sup>. HRMS (ESI) (*m/z*): [M+H<sup>+</sup>] calcd. for C<sub>48</sub>H<sub>61</sub>N<sub>6</sub>O<sub>8</sub>Si, 877.4320; found, 877.4327.

***N*-(11-(2,8,9-trioxa-5-aza-1-silabicyclo[3.3.3]undecan-1-yl)undecyl)-1-(4-(16-benzyl-1,4,10,13-tetraoxa-7,16-diazacyclooctadecan-7-yl)phenyl)benzo[*a*]imidazo[5,1,2-*cd*]indolizine-4-carboxamide 15bb.**

Following the general procedure, compound **15bb** was obtained as a yellow oil in 57% yield. <sup>1</sup>H NMR (500 MHz, CDCl<sub>3-10</sub>) δ 8.45 (s, 1H), 8.39 (d, *J* = 7.9 Hz, 1H), 8.37 – 8.30 (m, 1H), 8.27 (s, 1H), 8.26 – 8.21 (m, 2H), 7.75 (t, *J* = 7.7 Hz, 1H), 7.57 (t, *J* = 7.6 Hz, 1H), 7.39 – 7.15 (m, 5H), 6.91 (d, *J* = 8.5 Hz, 2H), 6.67 (s, 1H), 3.81 – 3.62 (m, 28H), 3.55 (q, *J* = 6.8 Hz, 2H), 2.84 (t, *J* = 5.9 Hz, 4H), 2.76 (t, *J* = 5.8 Hz, 6H), 1.69 (p, *J* = 7.3 Hz, 2H), 1.48 – 1.17 (m, 16H), 0.46 – 0.37 (m, 2H). <sup>13</sup>C-NMR (126 MHz, CDCl<sub>3-10</sub>) δ 167.4, 149.8, 149.1, 138.9, 133.2, 131.4, 130.0, 129.4, 129.3, 129.1, 129.0, 128.3, 127.0, 124.8, 123.4, 121.7, 121.0, 120.6, 111.9, 109.9, 107.5, 71.2, 70.8, 70.3, 69.0, 60.0, 58.1, 53.9, 51.5, 51.3, 40.8, 34.1, 29.8, 29.8, 29.7, 29.6, 29.5, 25.2, 16.6. IR(solid)  $\nu_{\max}$  2922, 2855, 1642, 1606, 1460, 1397, 1105, 770 cm<sup>-1</sup>. HRMS (ESI) (*m/z*): [M]<sup>+</sup> calcd. for C<sub>56</sub>H<sub>76</sub>N<sub>6</sub>O<sub>8</sub>Si, 988.5494; found, 988.5486.

## 4. NMR Spectra

### 16-(4-Nitrophenyl)-1,4,7,10,13-pentaoxa-16-azacyclooctadecane (2a)

<sup>1</sup>H-NMR

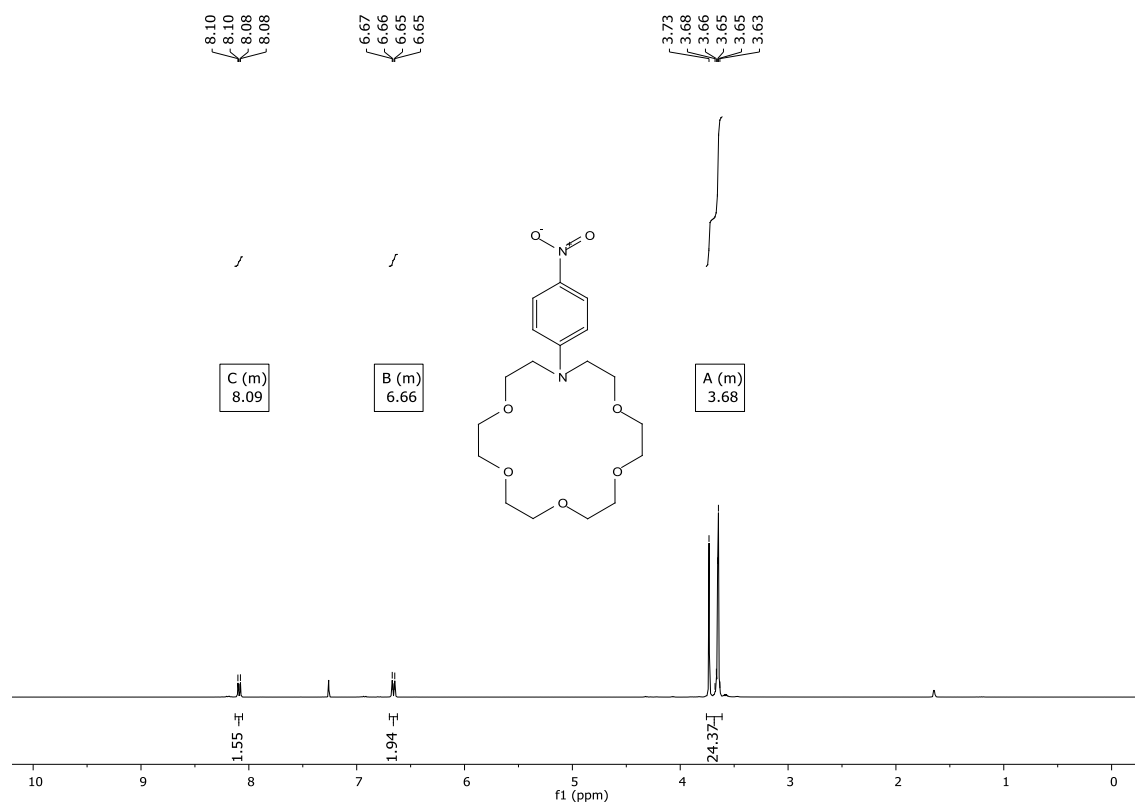

# 7-(4-Nitrophenyl)-1,4,10,13-tetraoxa-7,16-diazacyclooctadecane (2b)

<sup>1</sup>H-NMR

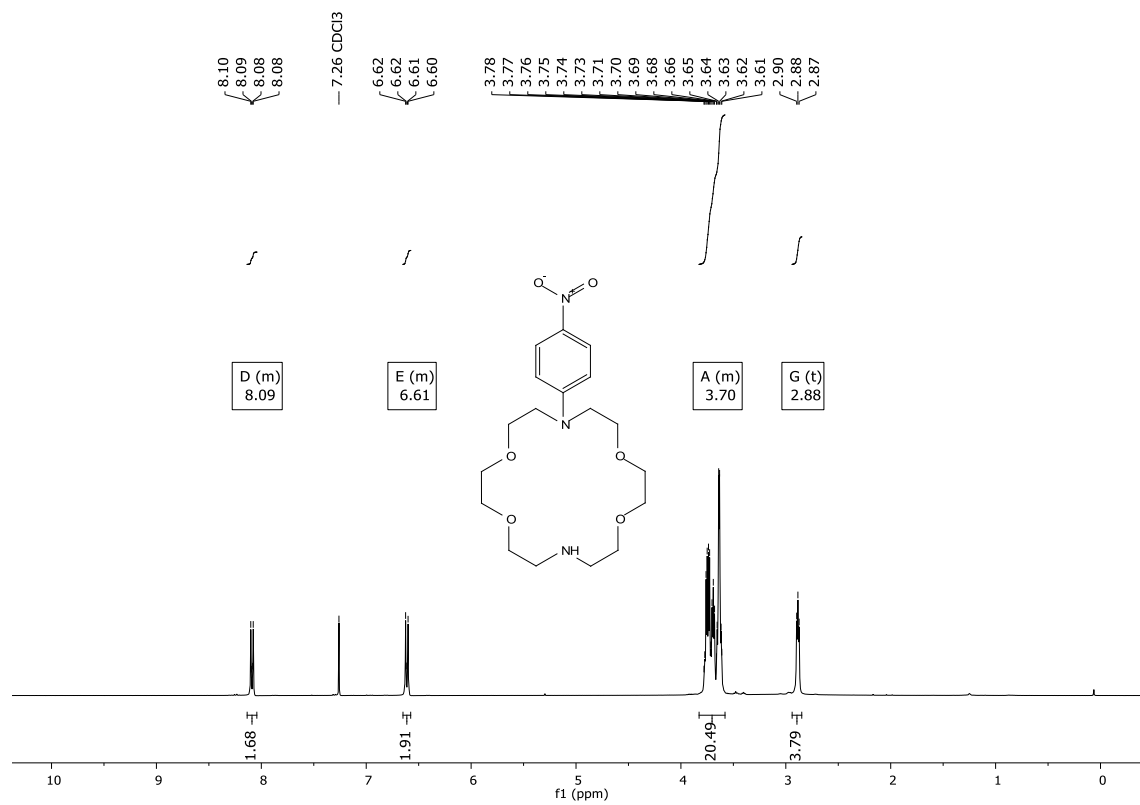

<sup>13</sup>C-NMR

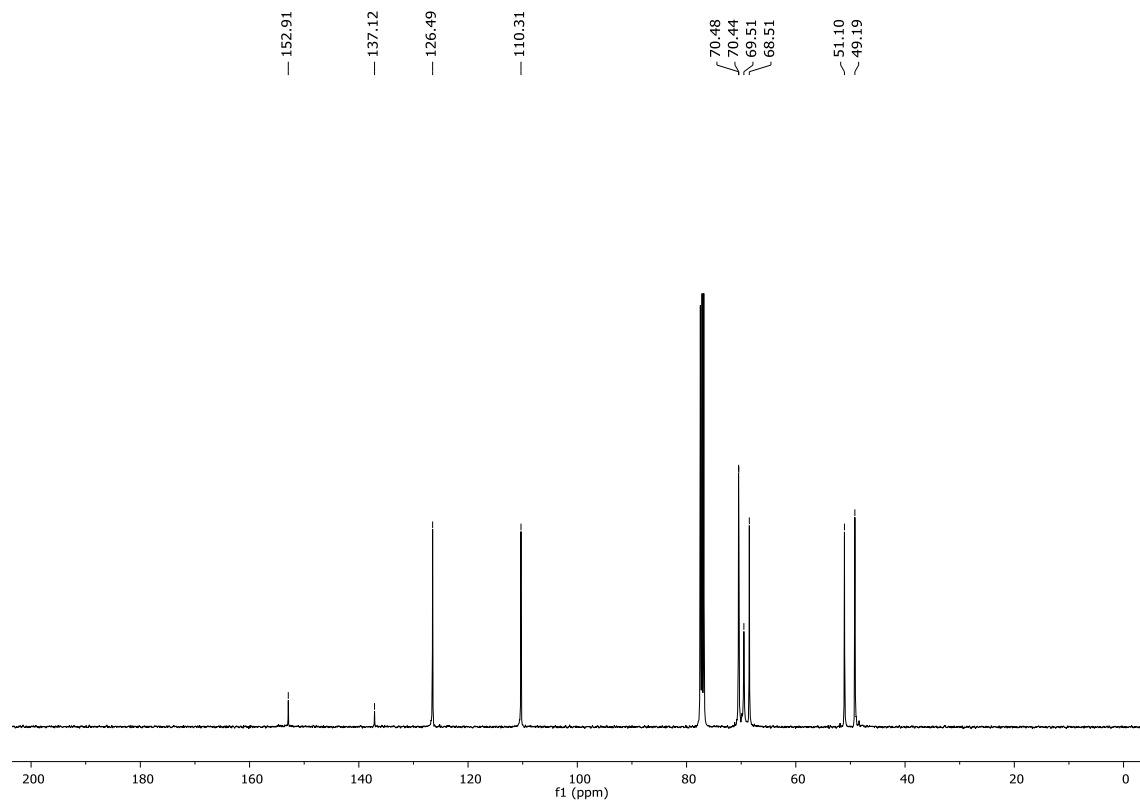

DEPT-135

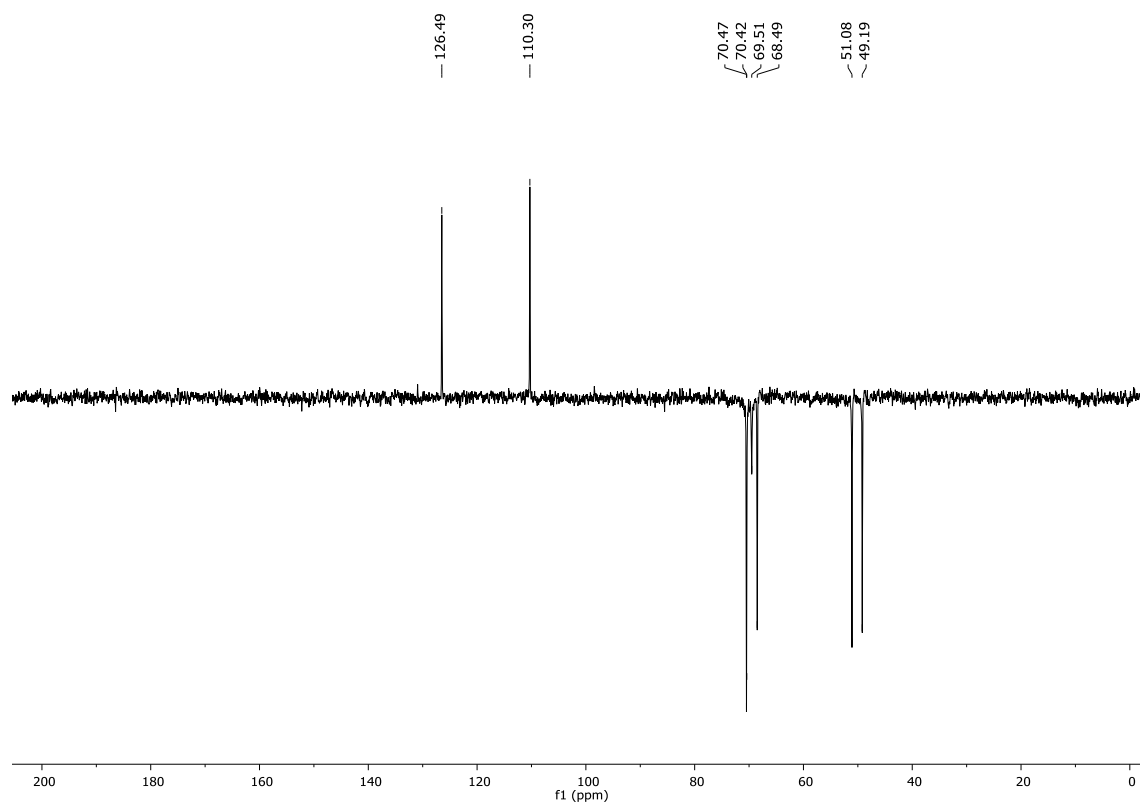

g-COSY

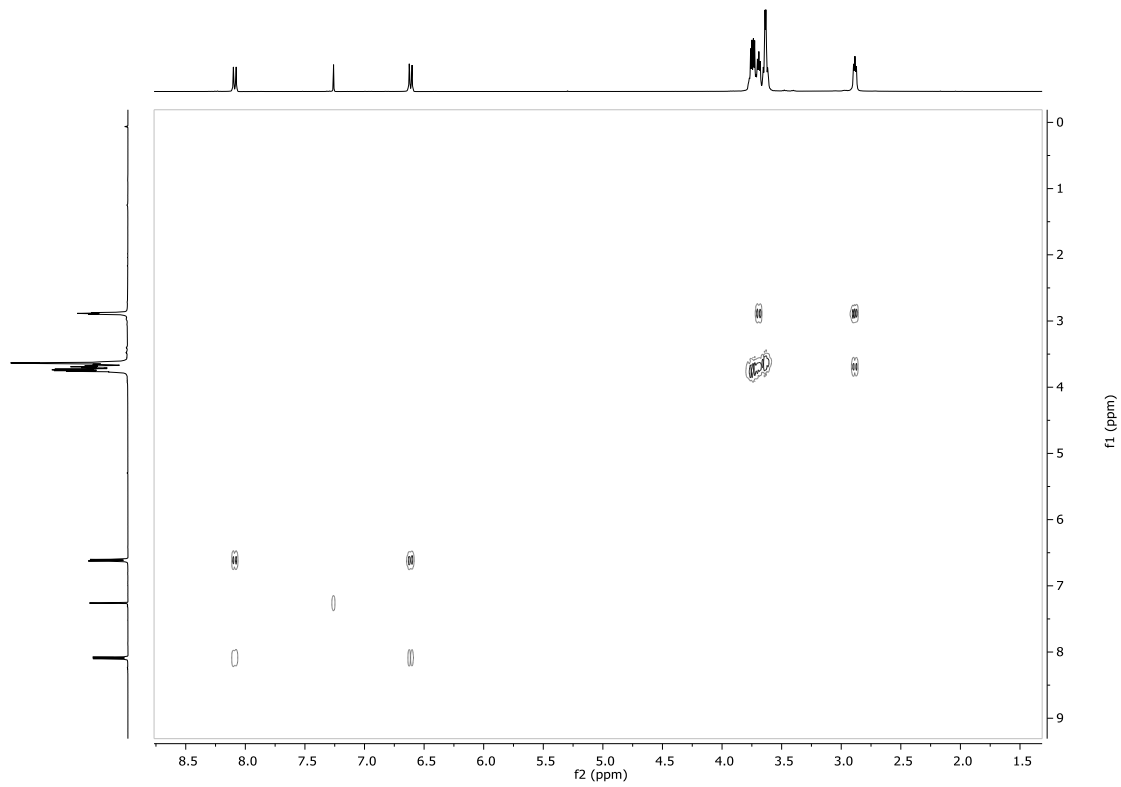

*g*-HSQC

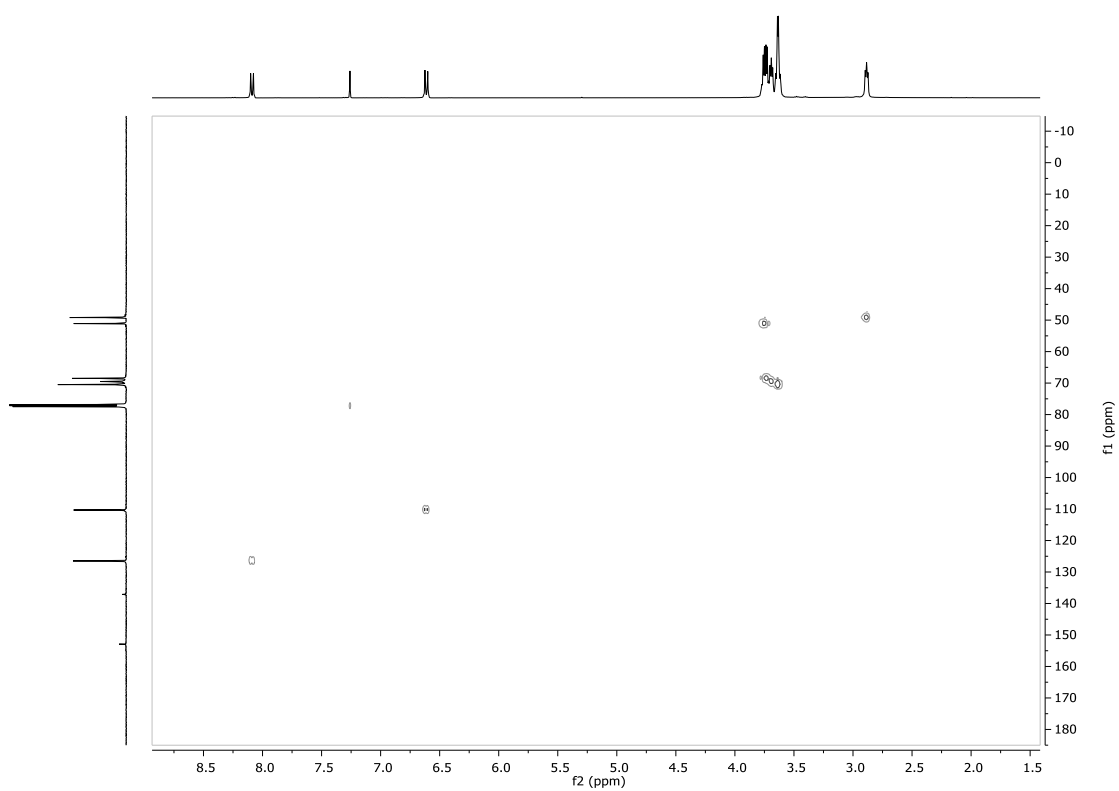

**2-(4-(1,4,7,10,13-Pentaoxa-16-azacyclooctadecan-16-yl)phenyl)-6-bromo-1H-benzo[de]isoquinoline-1,3(2H)-dione (4a)**

<sup>1</sup>H-NMR

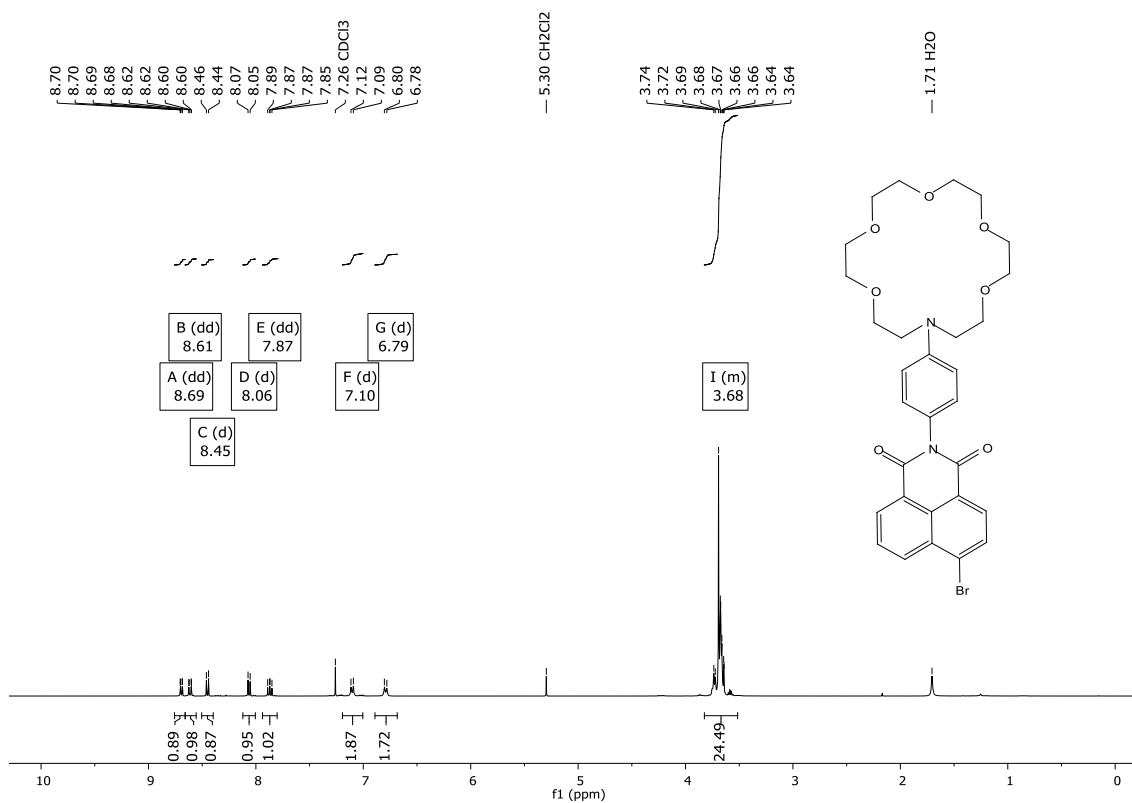



**2-(4-(1,4,10,13-tetraoxa-7,16-diazacyclooctadecan-7-yl)phenyl)-6-bromo-1H-benzo[de]isoquinoline-1,3(2H)-dione (4b)**

<sup>1</sup>H-NMR

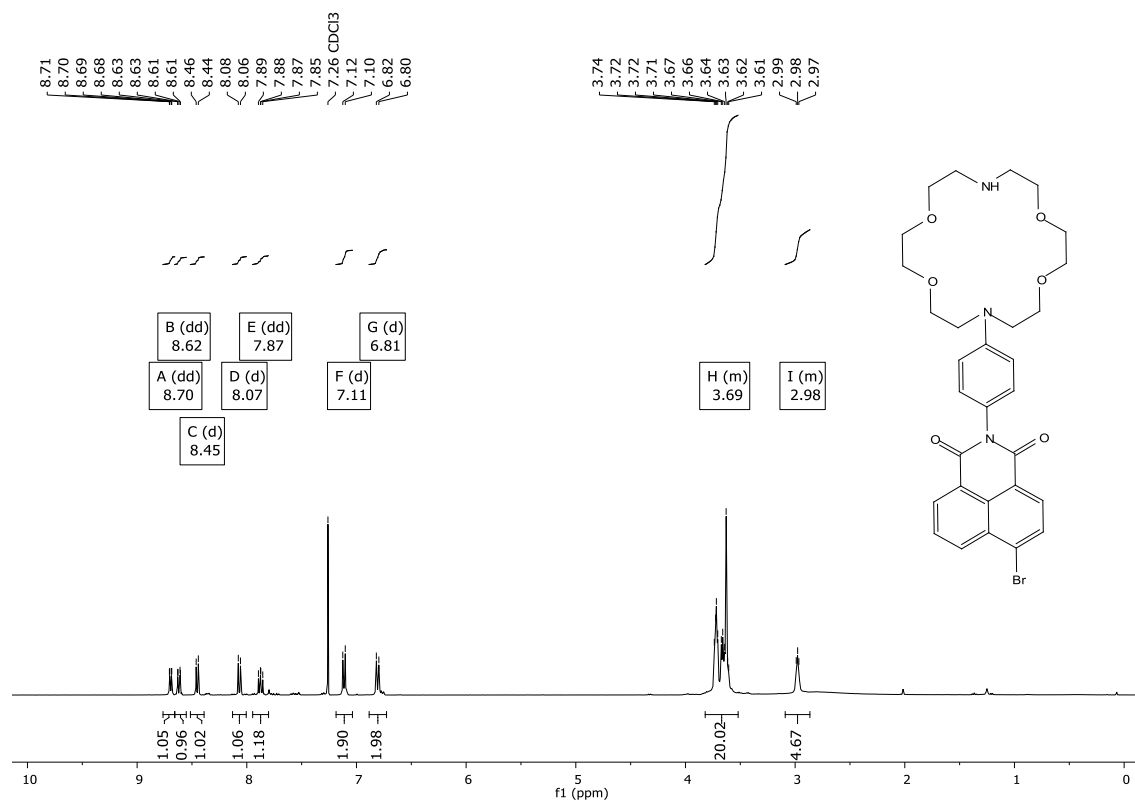

**2-(4-(16-Benzyl-1,4,10,13-tetraoxa-7,16-diazacyclooctadecan-7-yl)phenyl)-6-bromo-1H-benzo[de]isoquinoline-1,3(2H)-dione (4c)**

<sup>1</sup>H-NMR

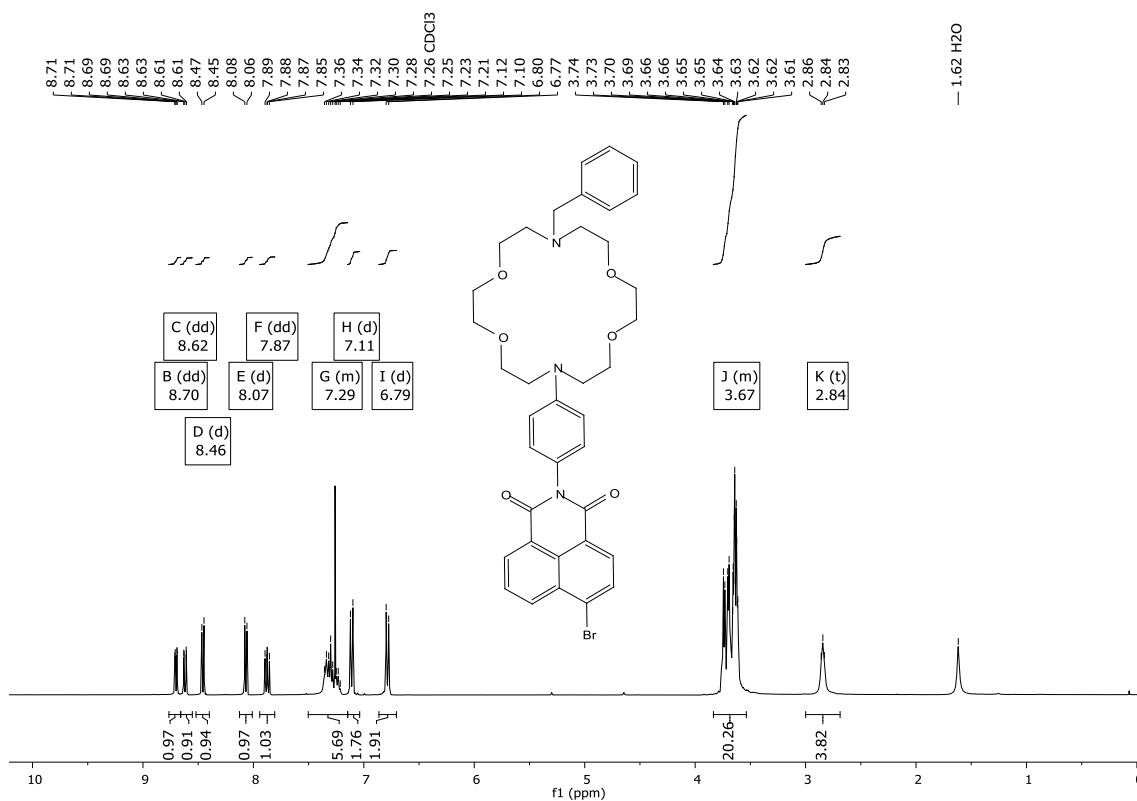

<sup>13</sup>C-NMR

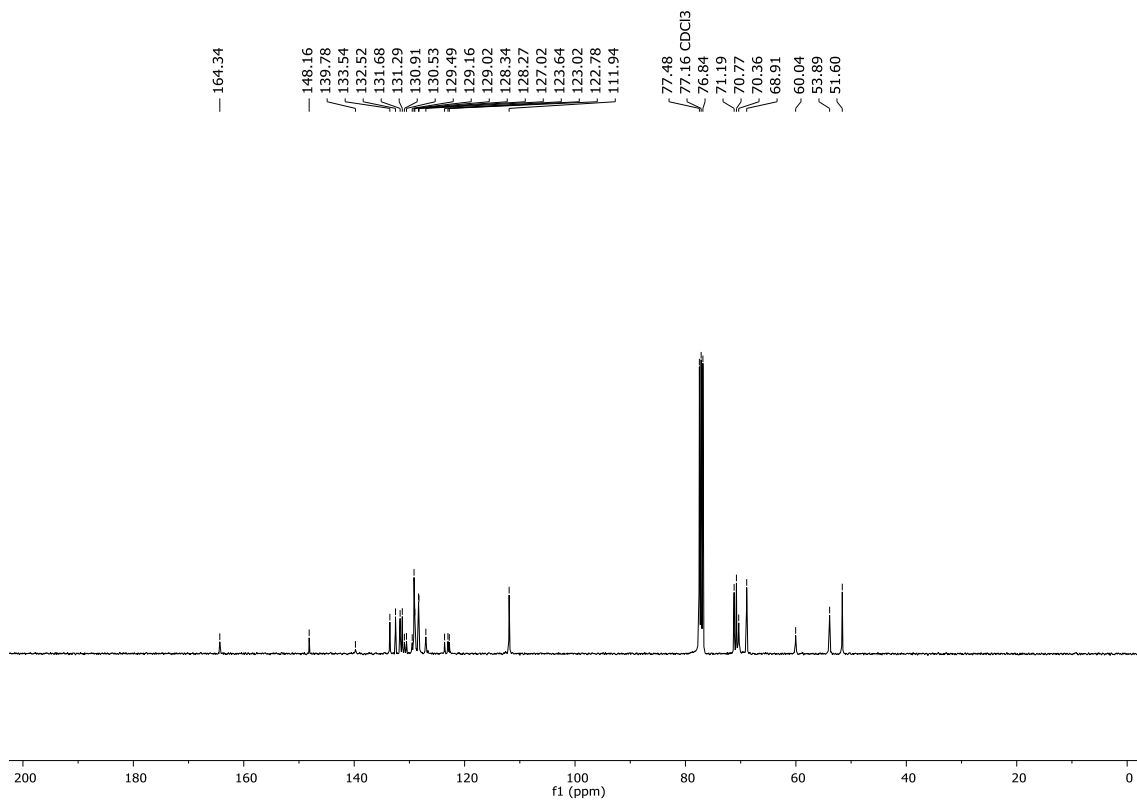

DEPT-135

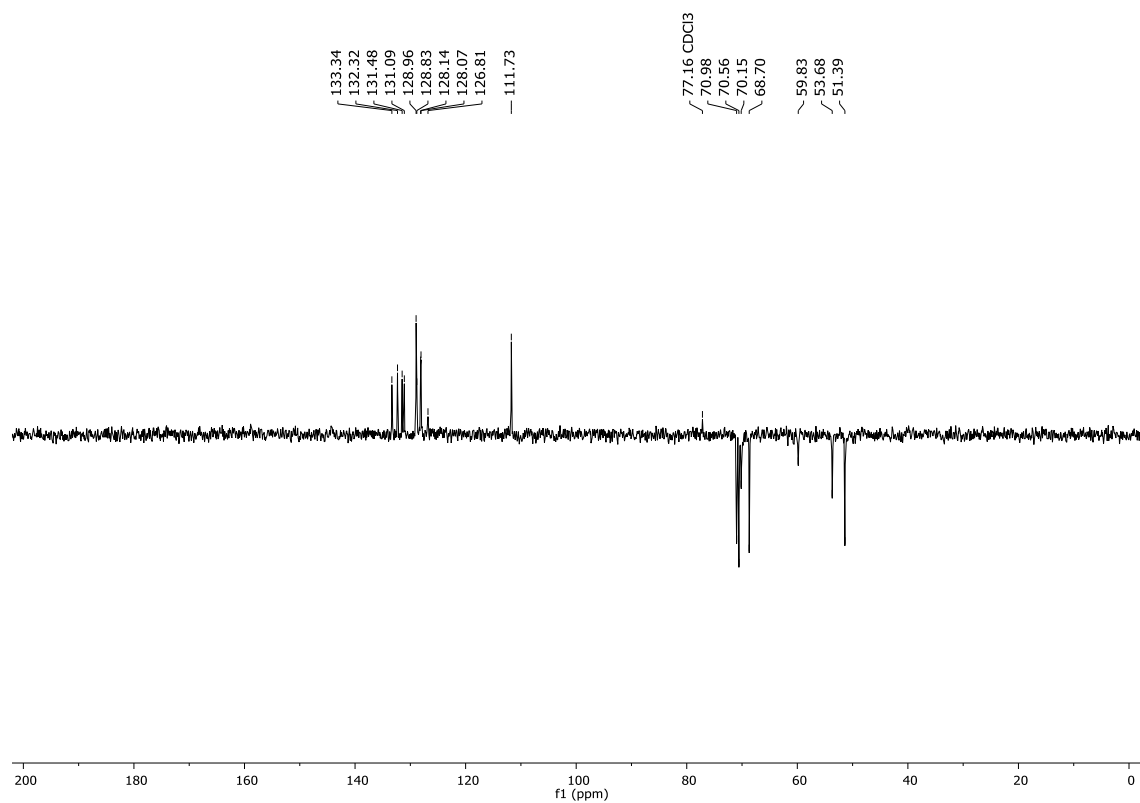

g-COSY

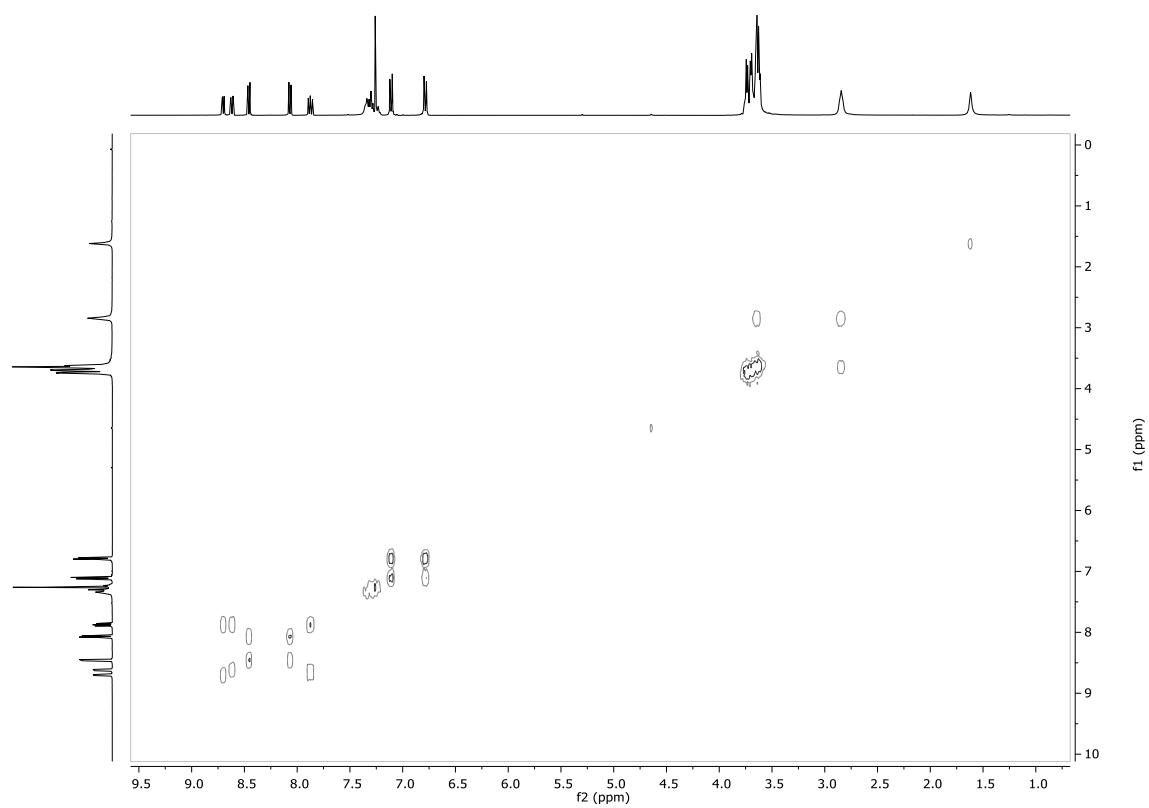

*g*-HSQC

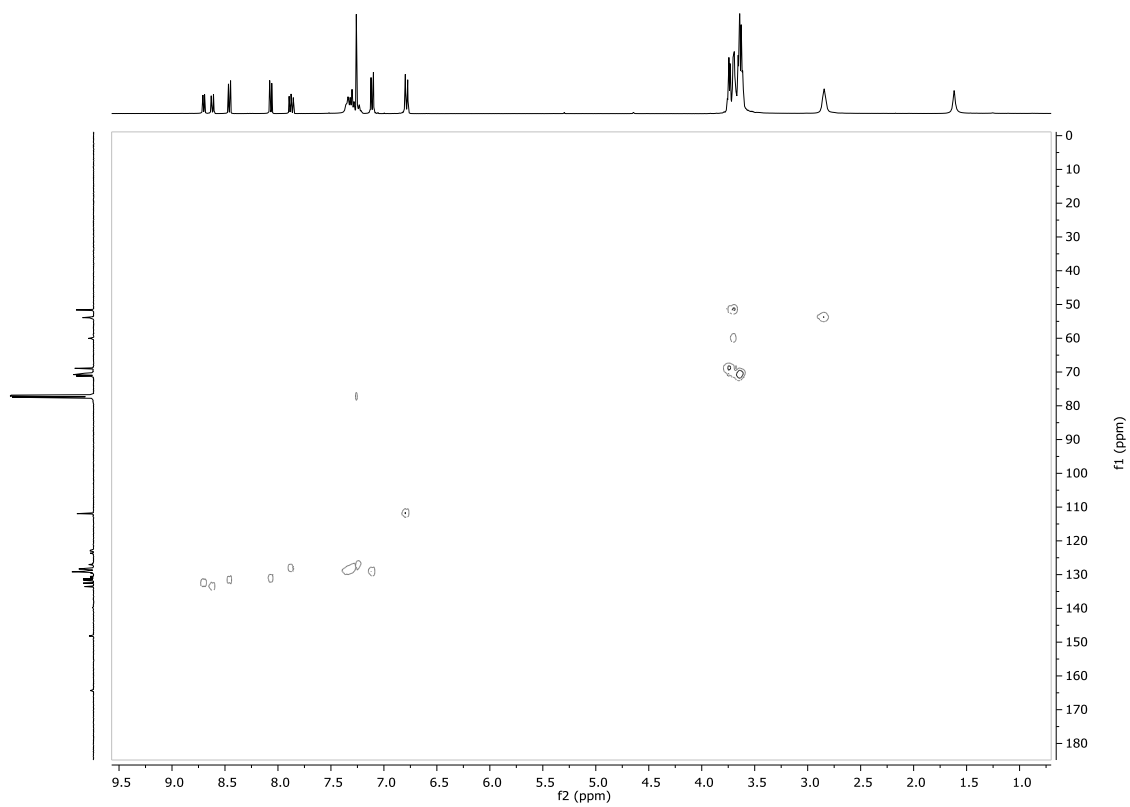

### 3-(2,8,9-Trioxa-5-aza-1-silabicyclo[3.3.3]undecan-1-yl)propan-1-amine (6a)

<sup>1</sup>H-NMR

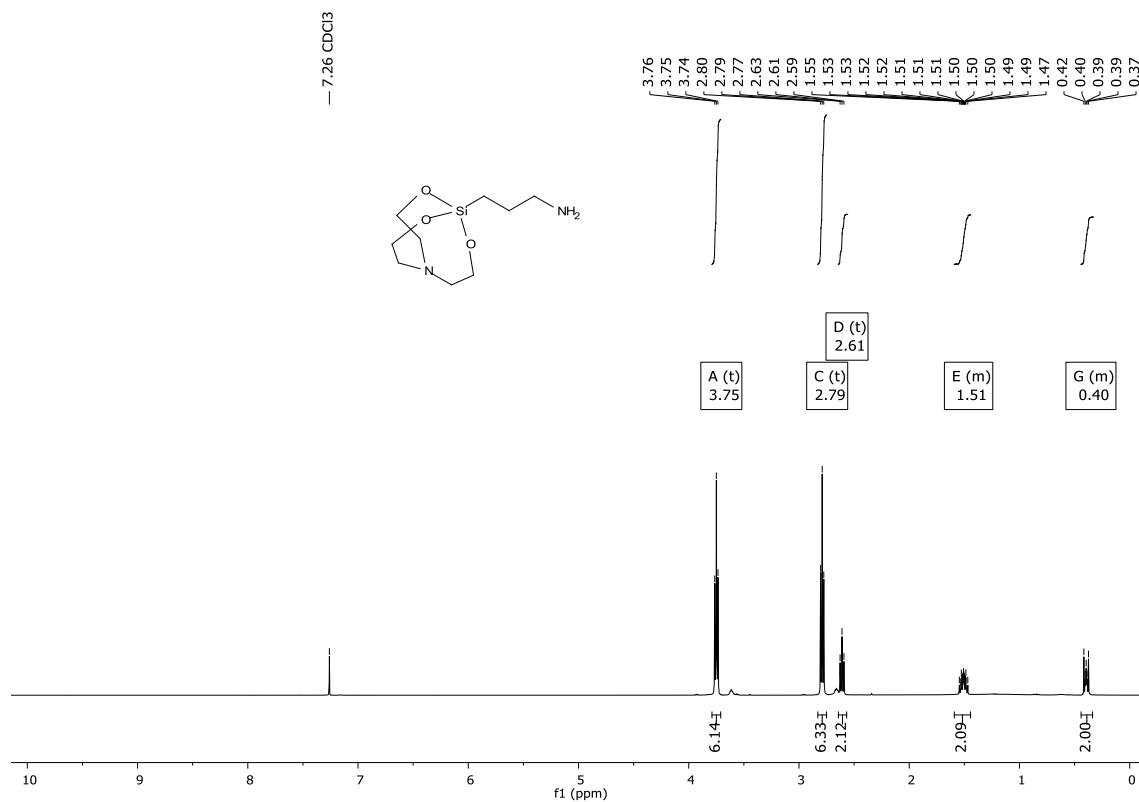

<sup>13</sup>C-NMR

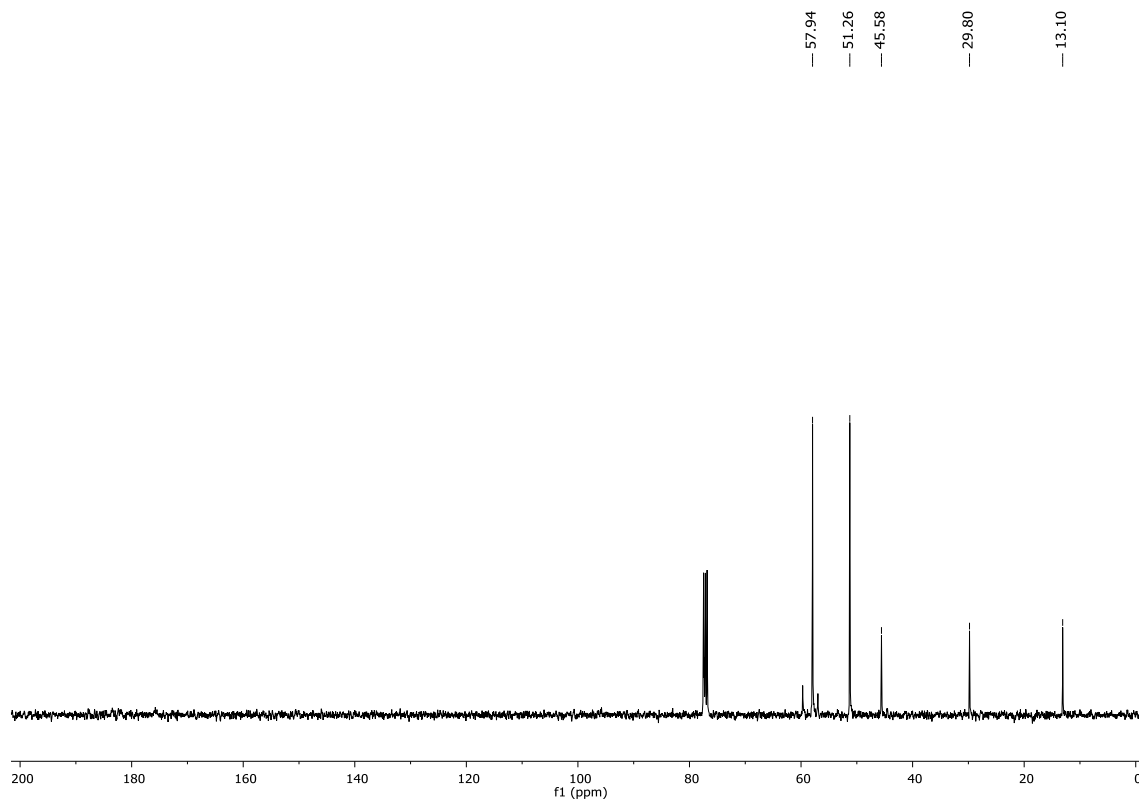

DEPT-135

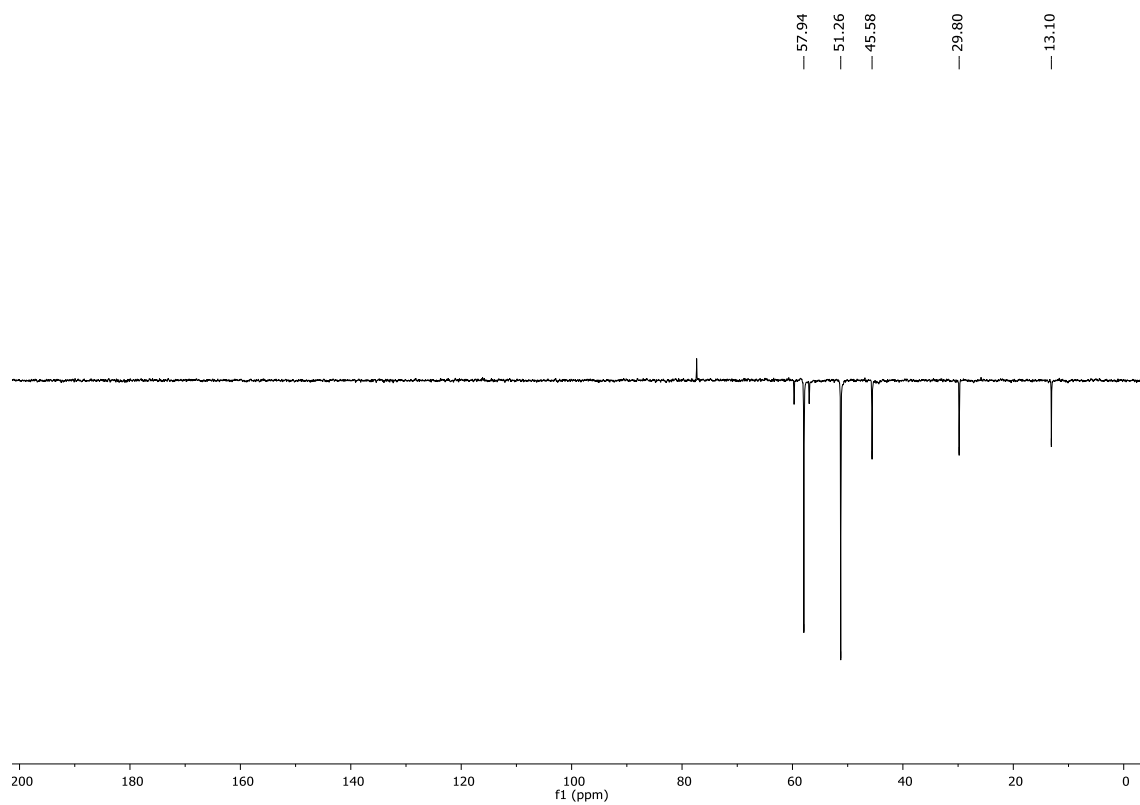

g-COSY

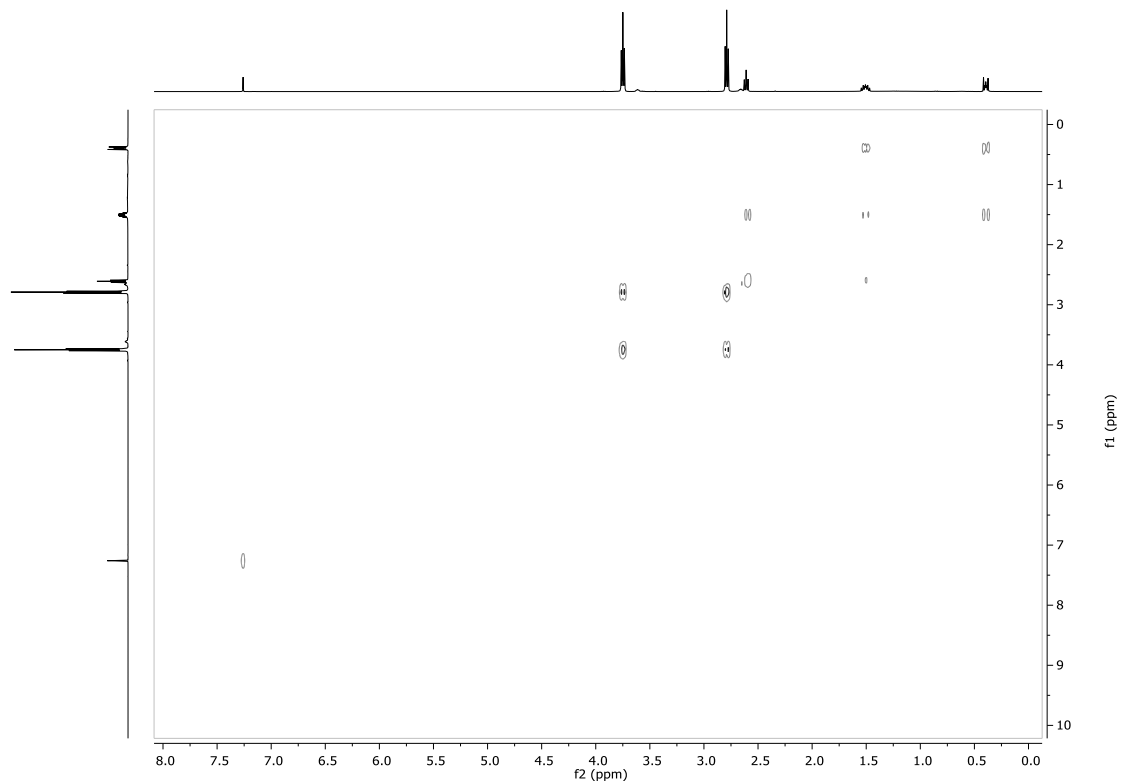

*g*-HSQC

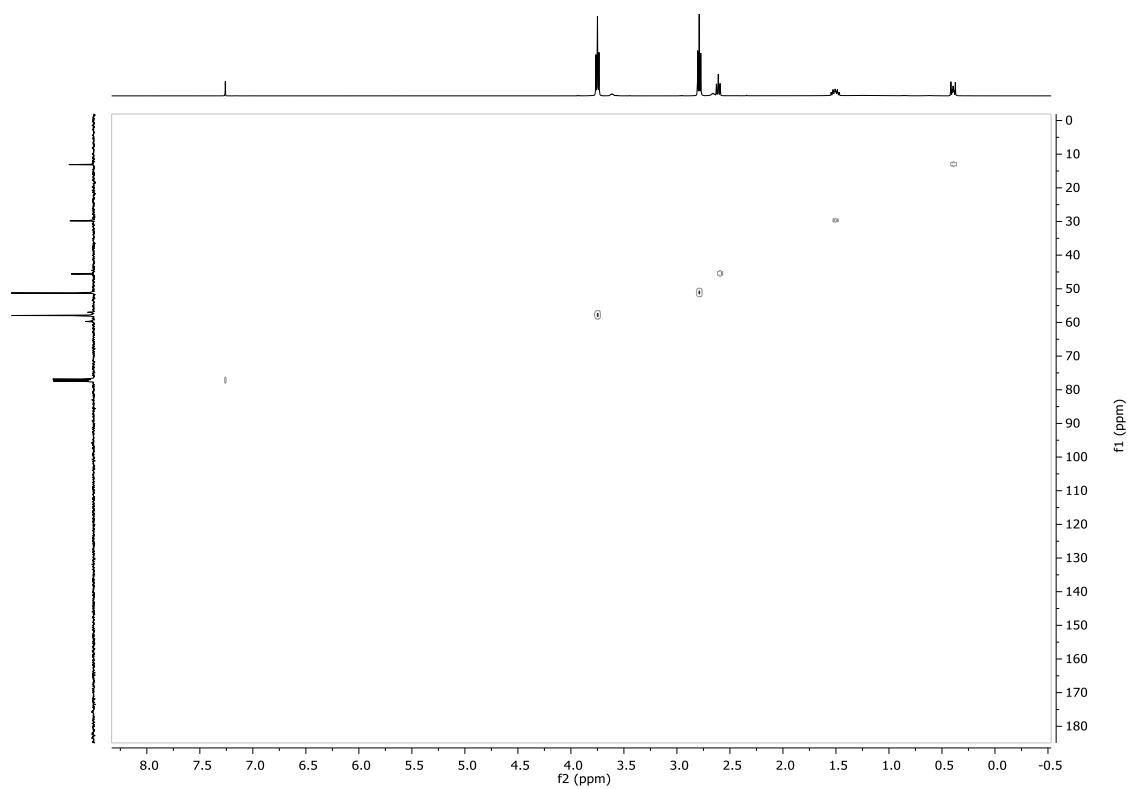

# 11-(2,8,9-Trioxa-5-aza-1-silabicyclo[3.3.3]undecan-1-yl)undecan-1-amine (6b)

<sup>1</sup>H-NMR

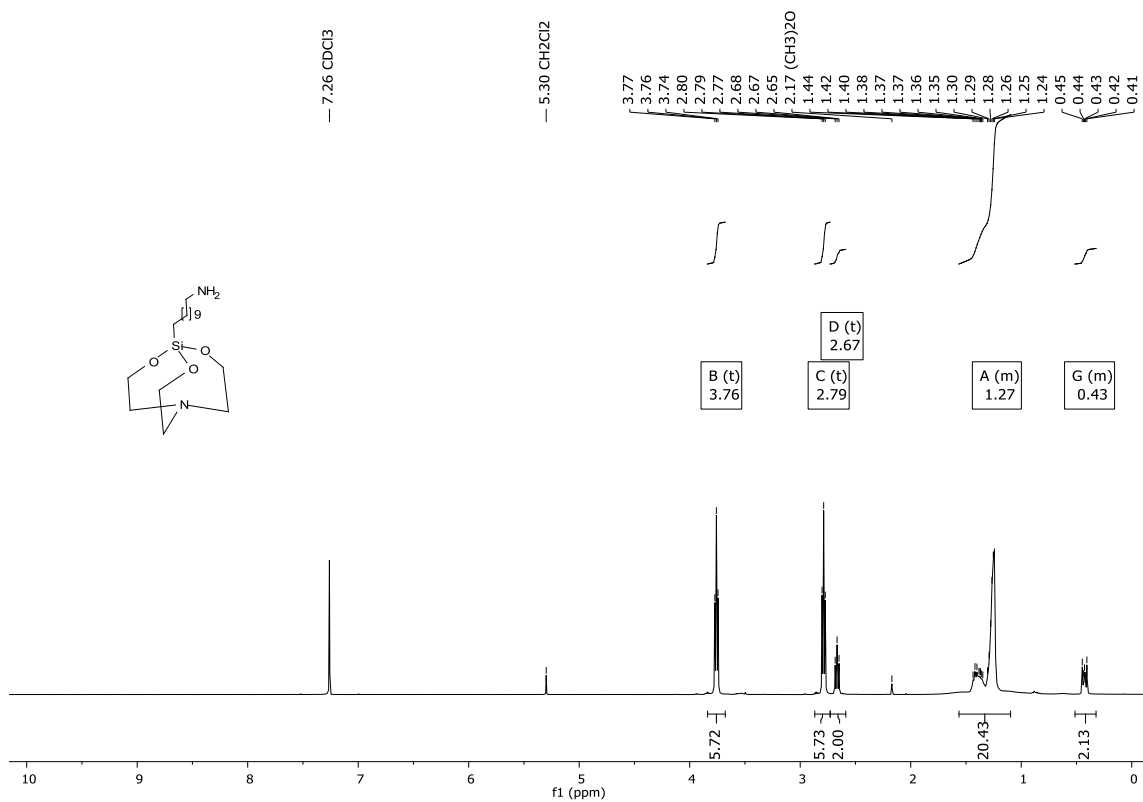

<sup>13</sup>C-NMR

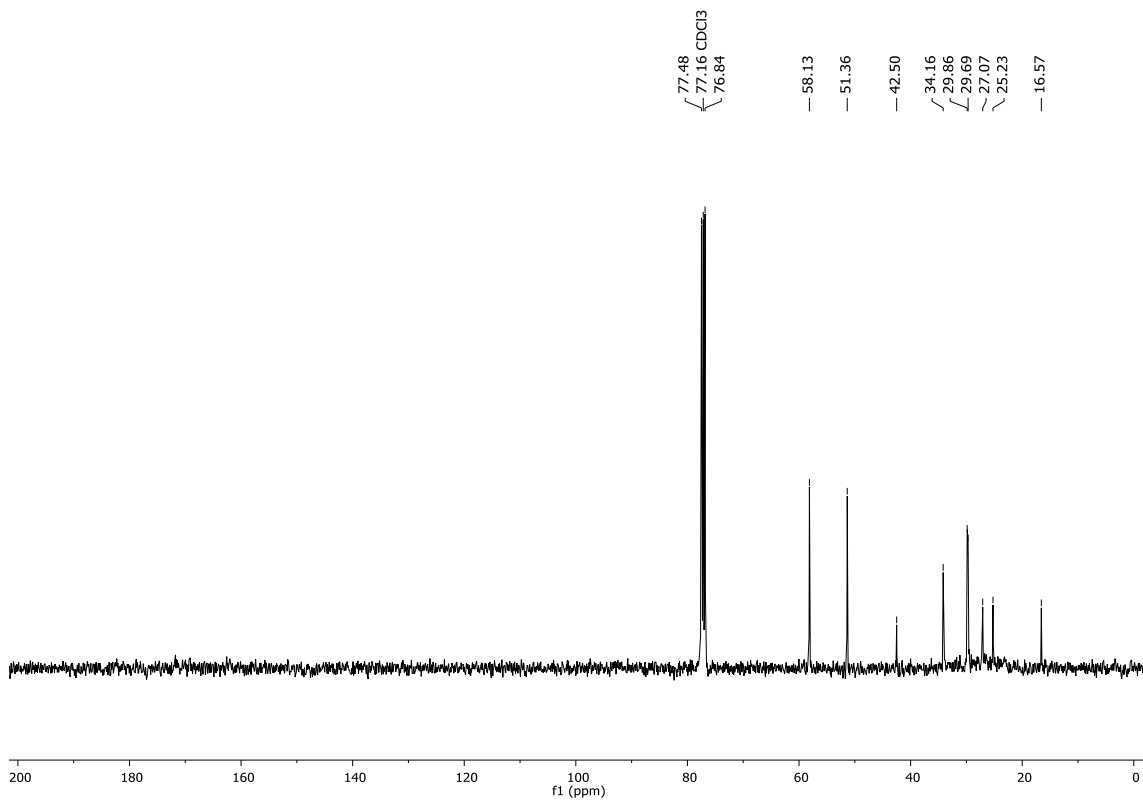



DEPT-135

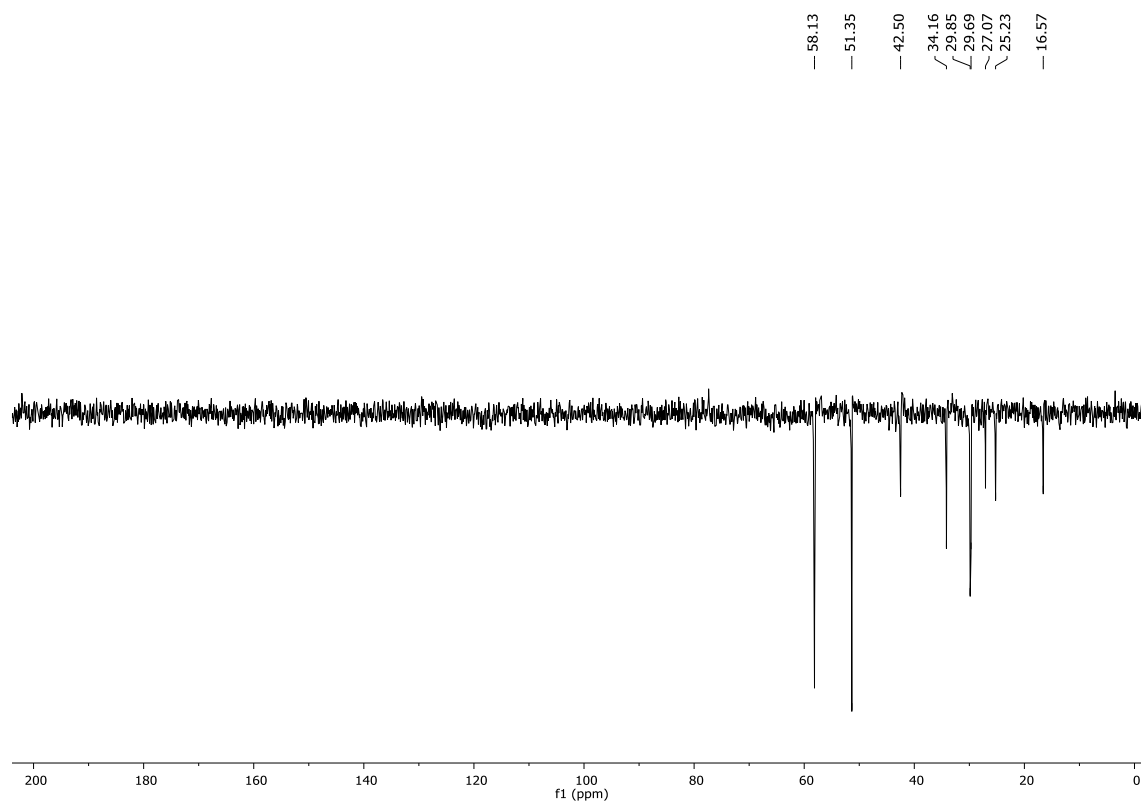

g-COSY

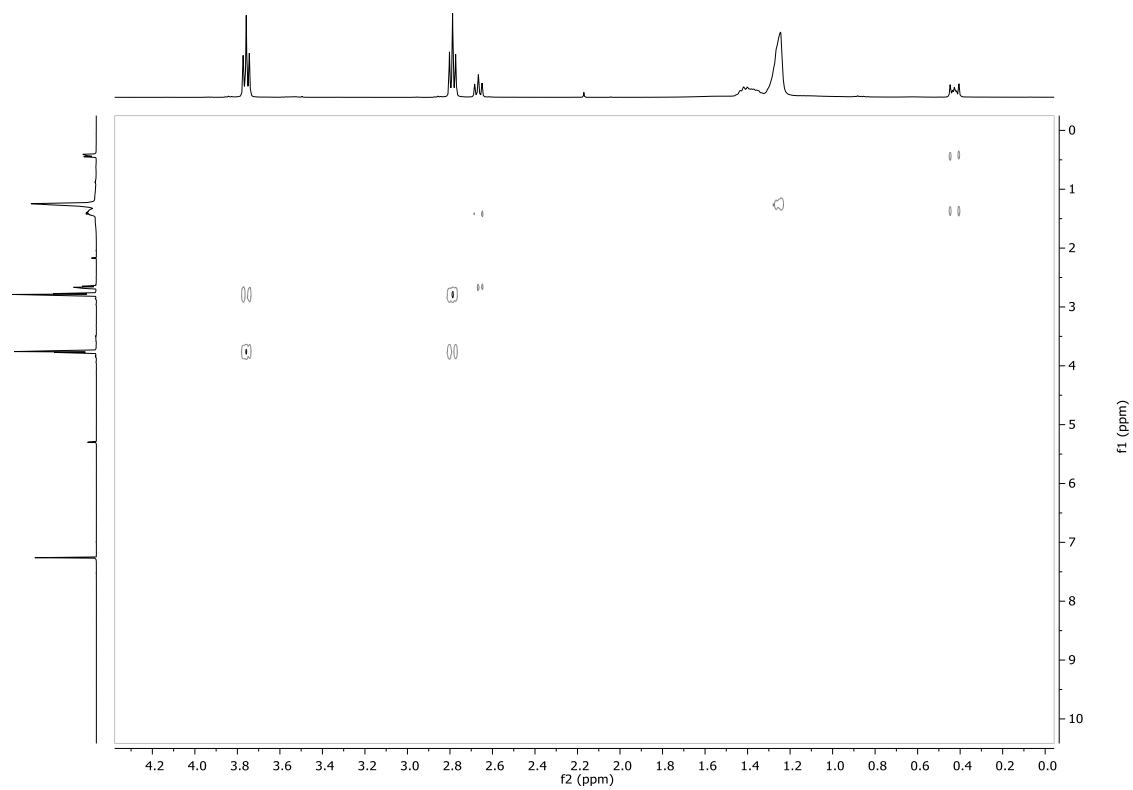

*g*-HSQC

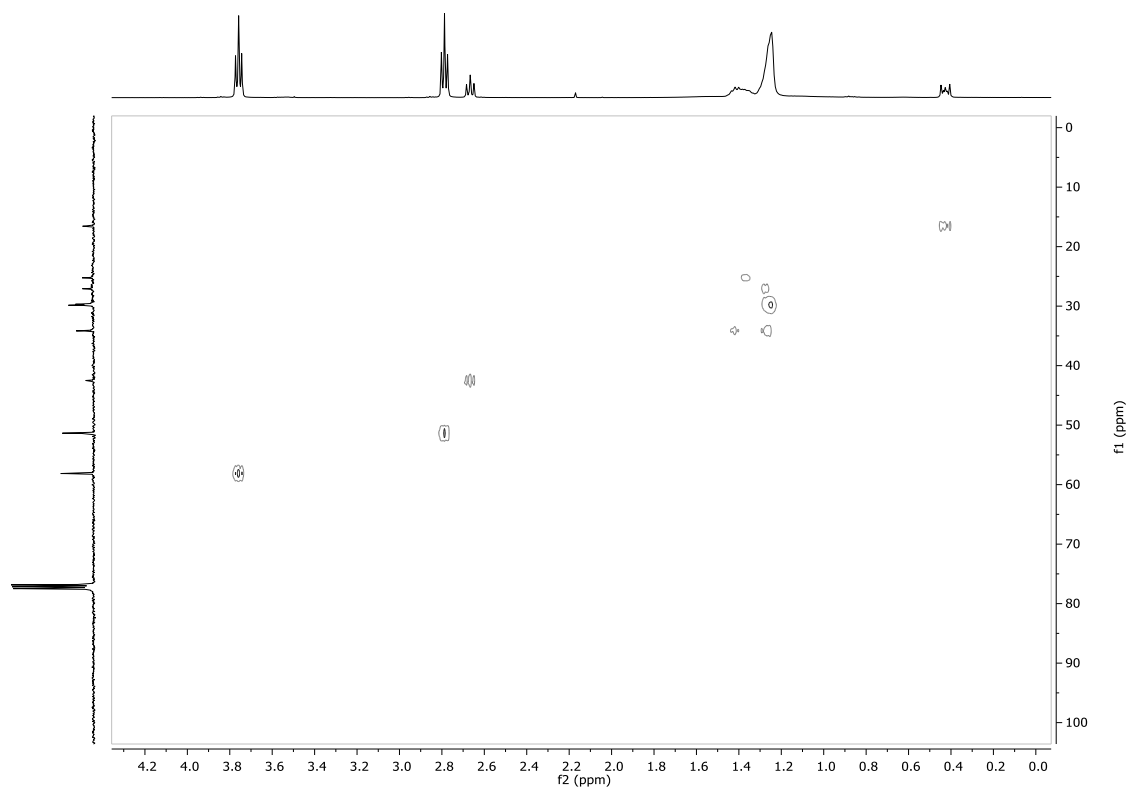

**2-(4-(1,4,7,10,13-Pentaoxa-16-azacyclooctadecan-16-yl)phenyl)-6-((3-(2,8,9-trioxa-5-aza-1-silabicyclo[3.3.3]undecan-1-yl)propyl)amino)-1*H*-benzo[*de*]isoquinoline-1,3(2*H*)-dione (7aa)**

<sup>1</sup>H-NMR

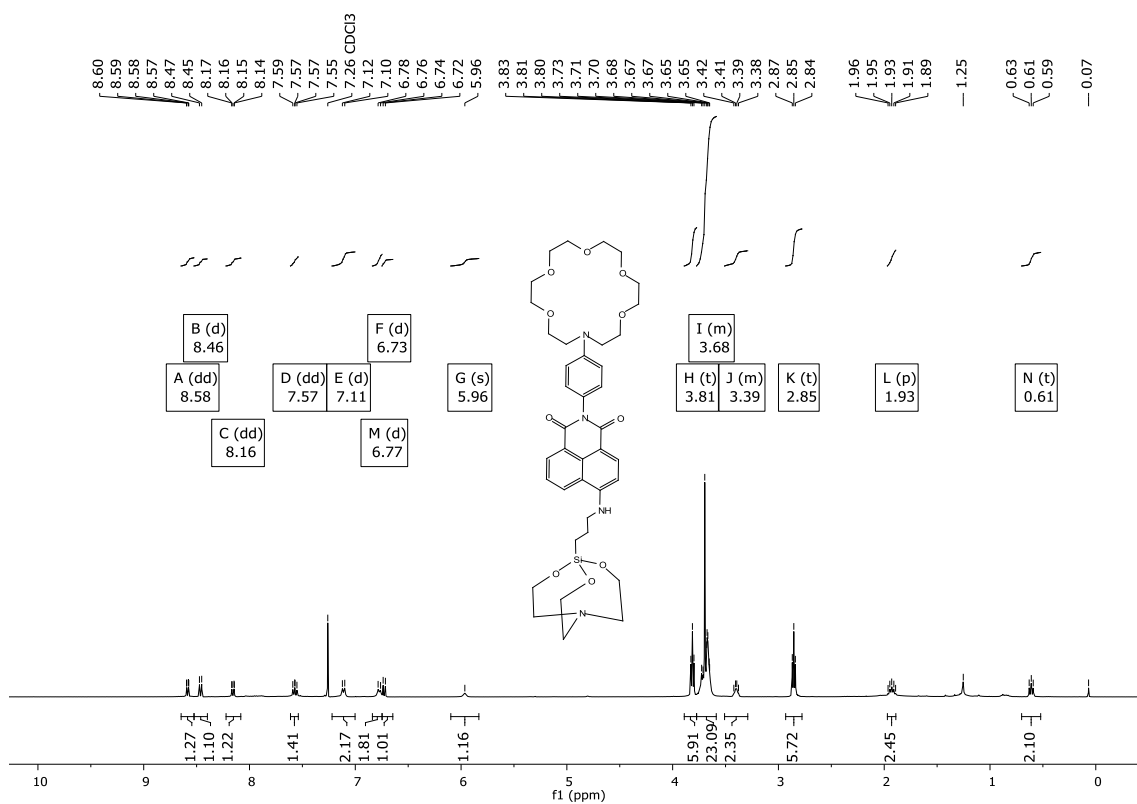

<sup>13</sup>C-NMR

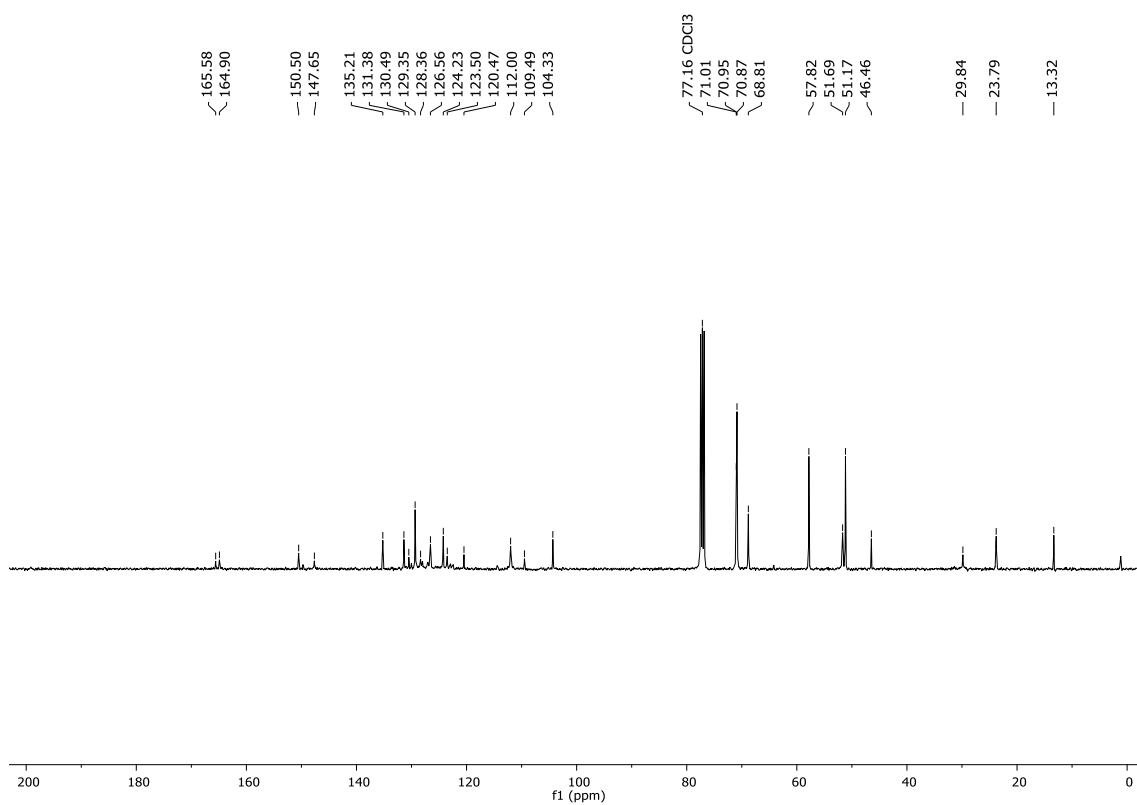

DEPT-135

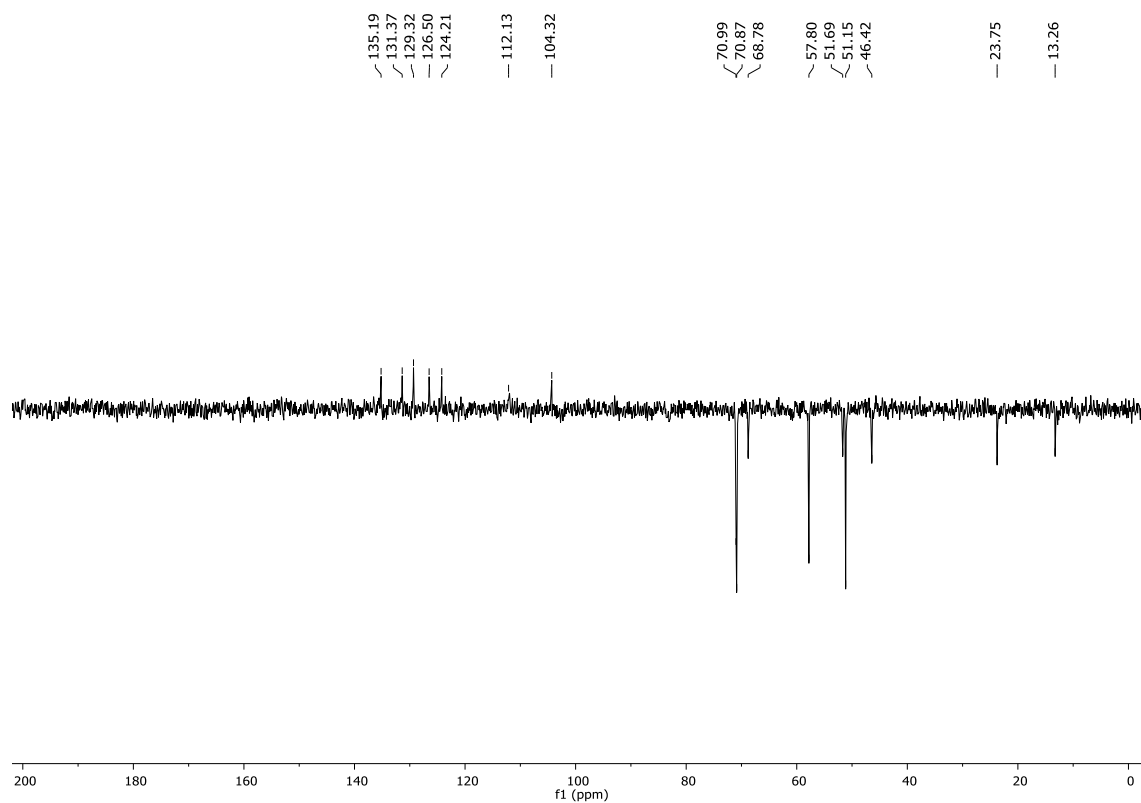

g-COSY

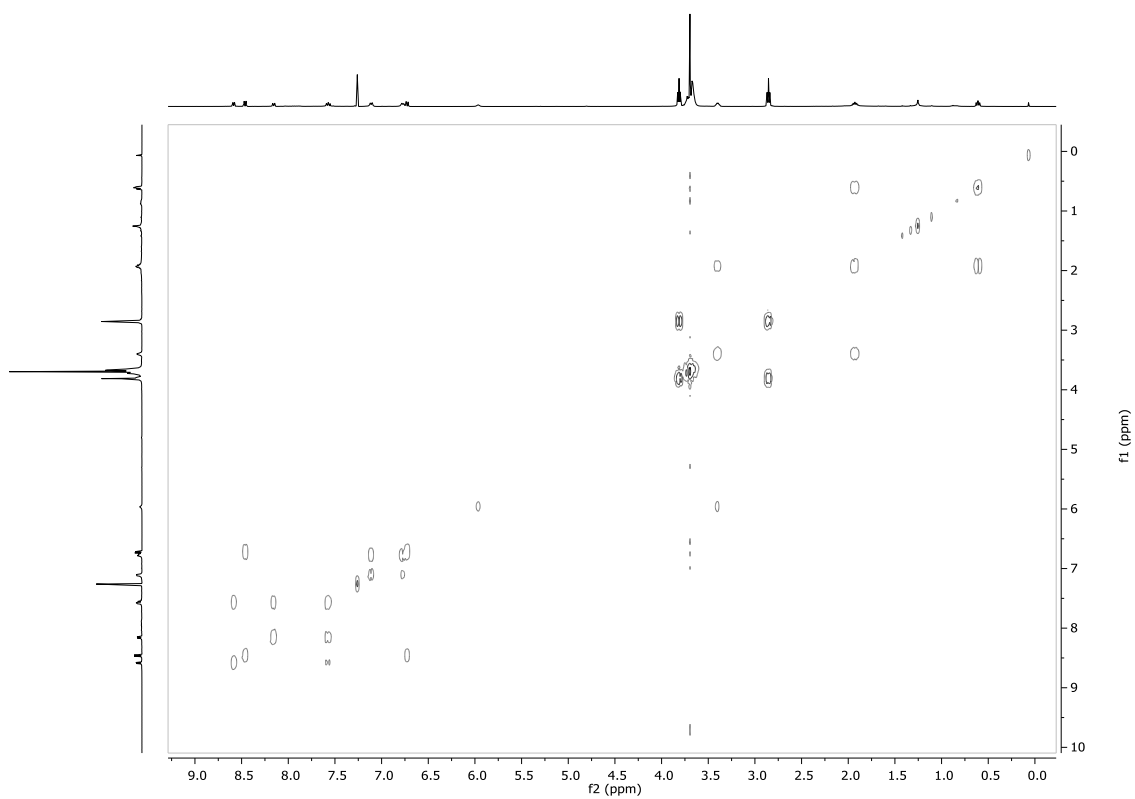

*g*-HSQC

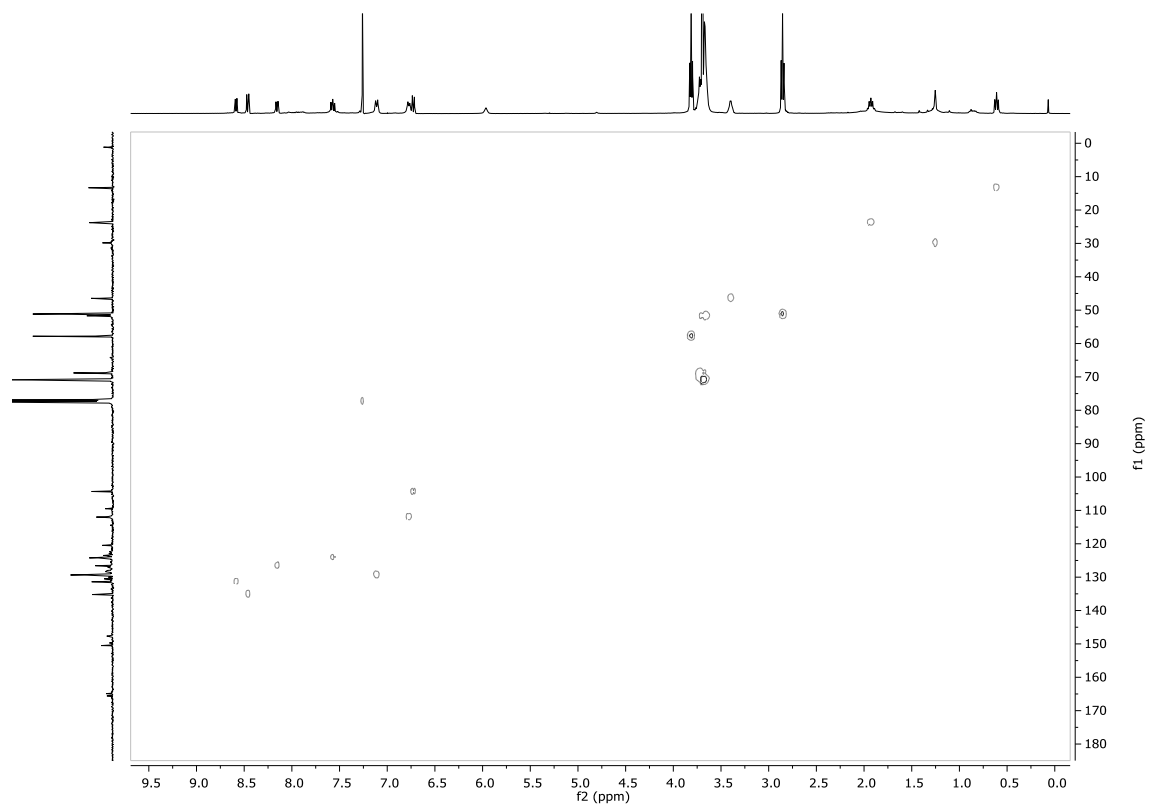

**2-(4-(1,4,7,10,13-Pentaoxa-16-azacyclooctadecan-16-yl)phenyl)-6-((11-(2,8,9-trioxa-5-aza-1-silabicyclo[3.3.3]undecan-1-yl)undecyl)amino)-1*H*-benzo[*de*]isoquinoline-1,3(2*H*)-dione (7ab)**

<sup>1</sup>H-NMR

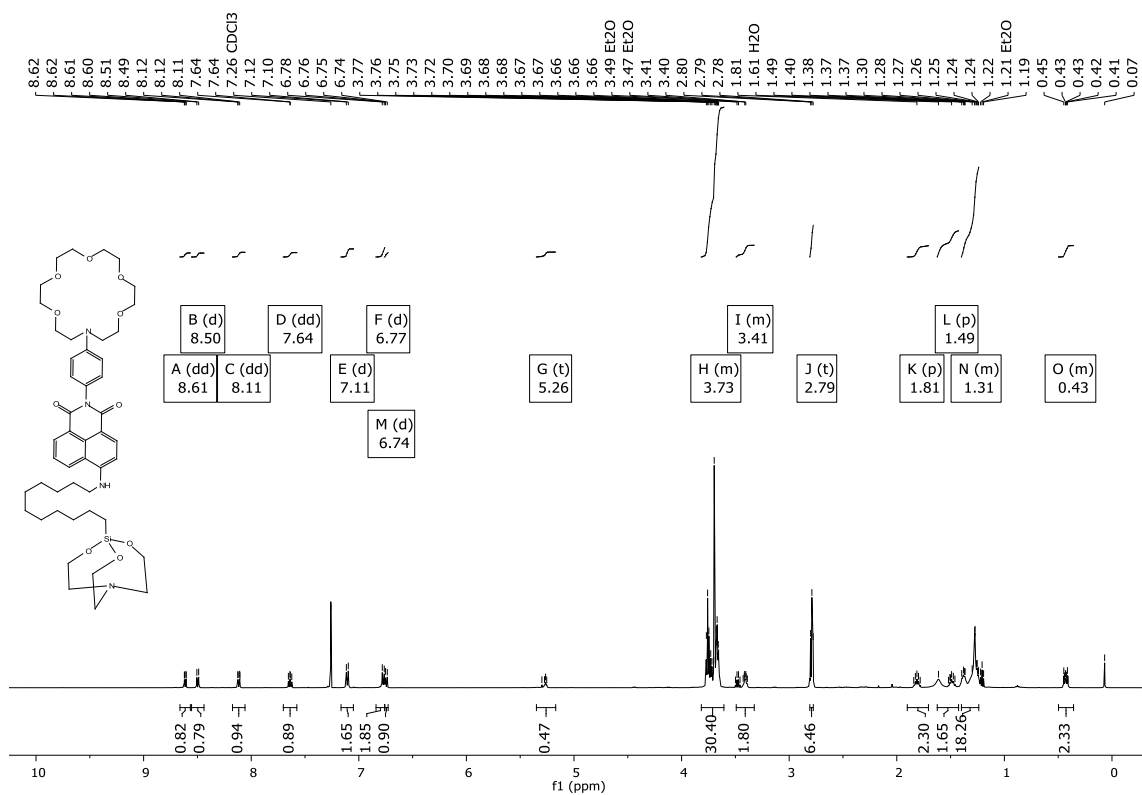

<sup>13</sup>C-NMR

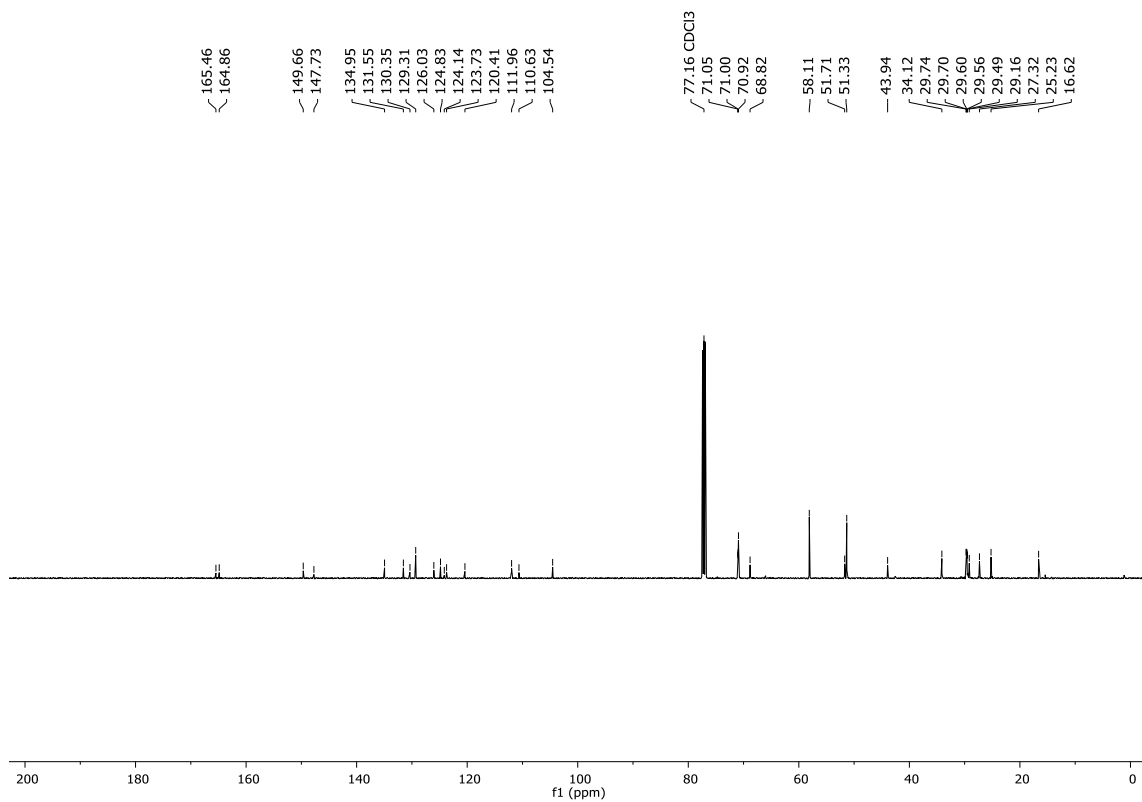

DEPT-135

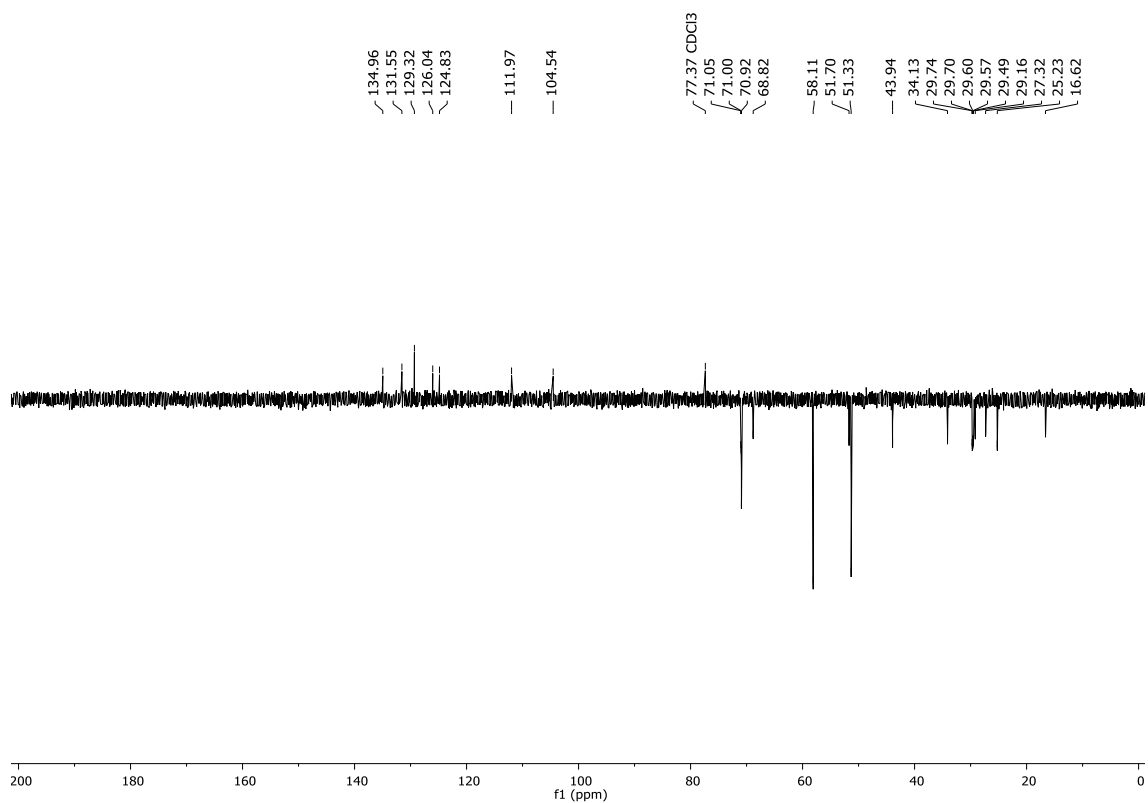

g-COSY

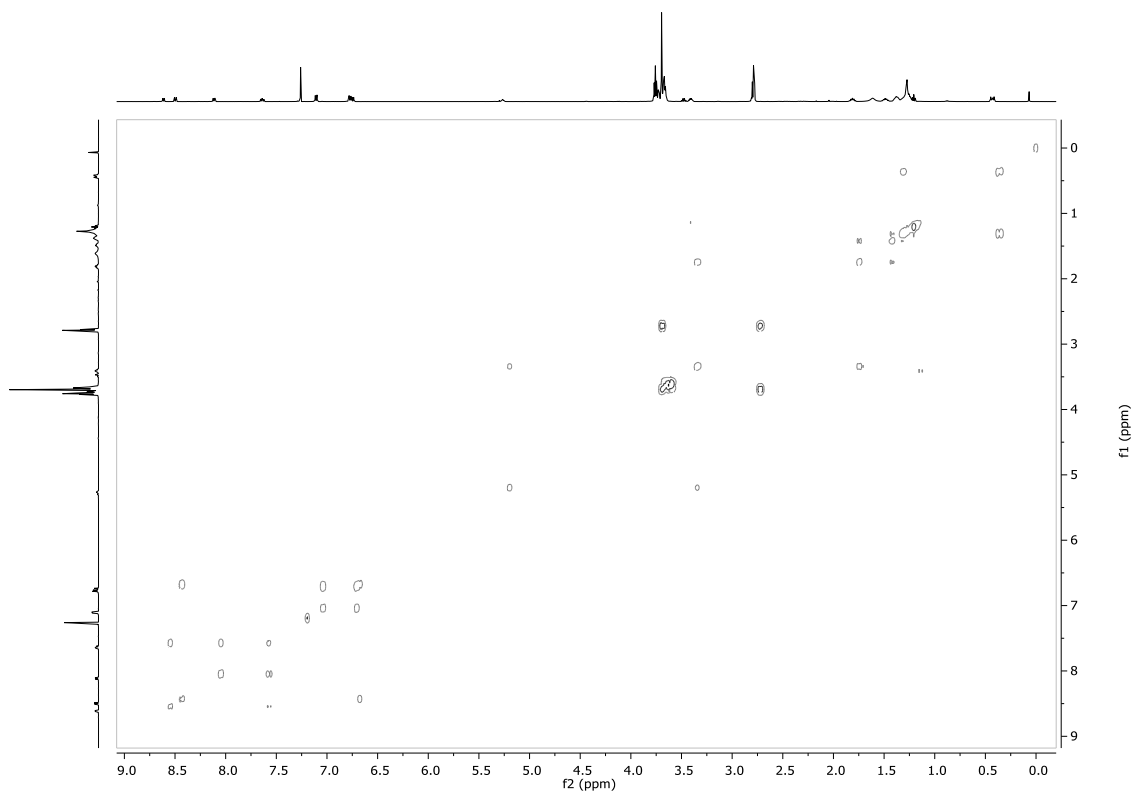

*g*-HSQC

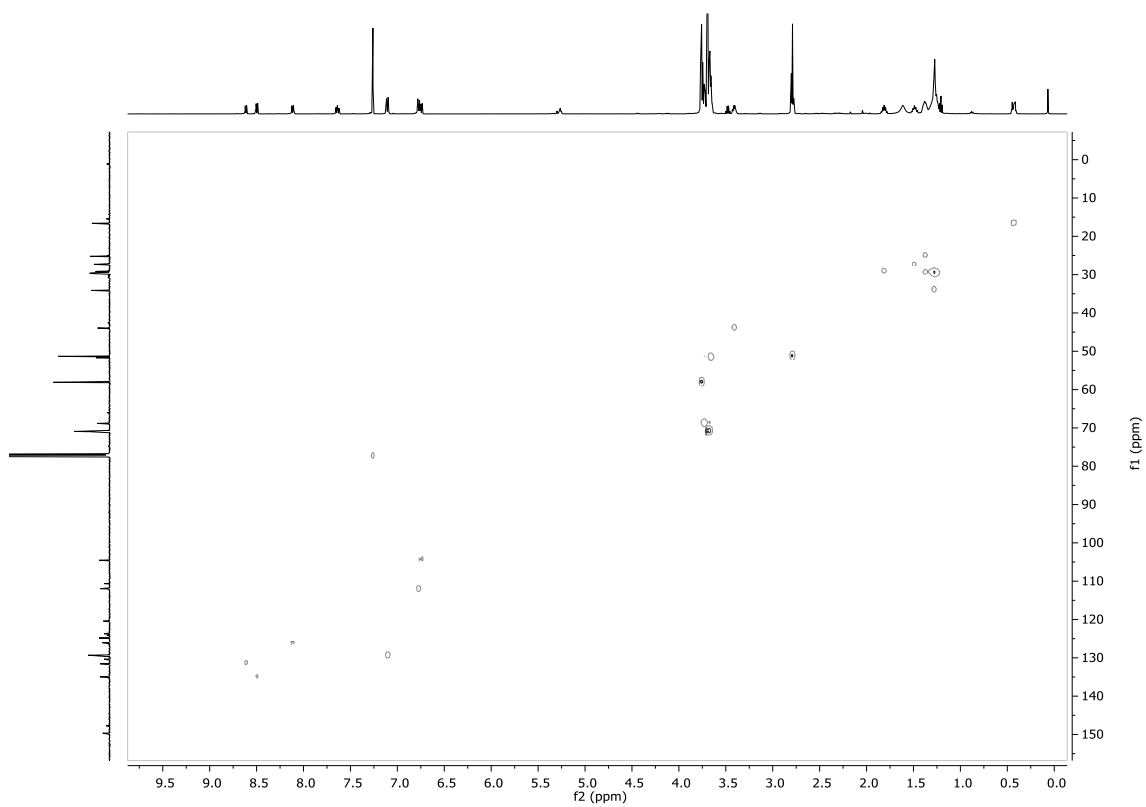



**6-((3-(2,8,9-Trioxa-5-aza-1-silabicyclo[3.3.3]undecan-1-yl)propyl)amino)-2-(4-(16-benzyl-1,4,10,13-tetraoxa-7,16-diazacyclooctadecan-7-yl)phenyl)-1H-benzo[de]isoquinoline-1,3(2H)-dione (7ba)**

<sup>1</sup>H-NMR

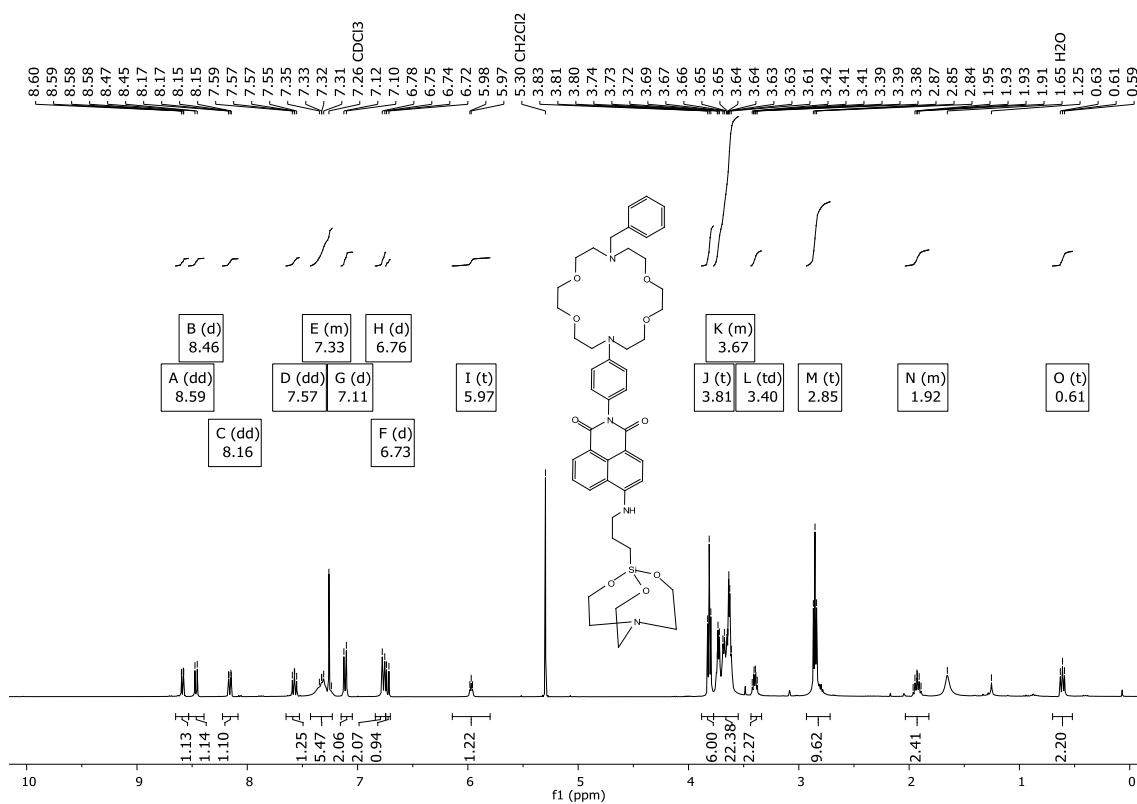

<sup>13</sup>C-NMR

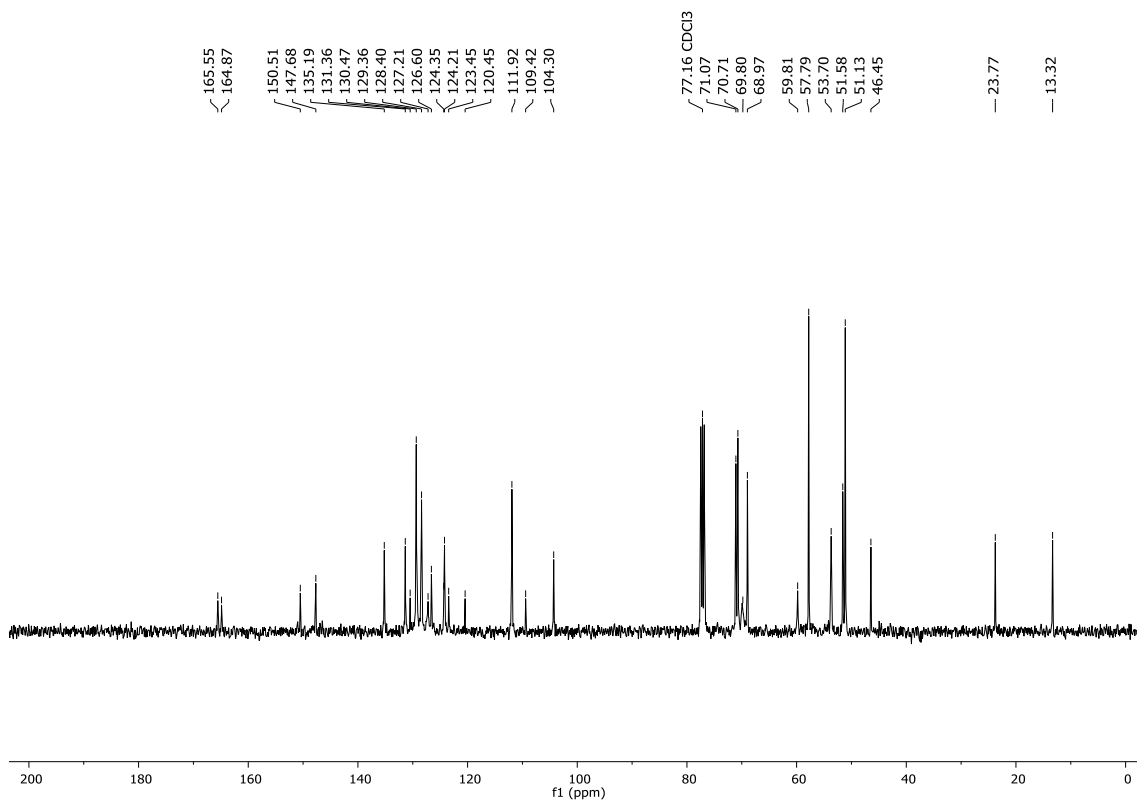

DEPT-135

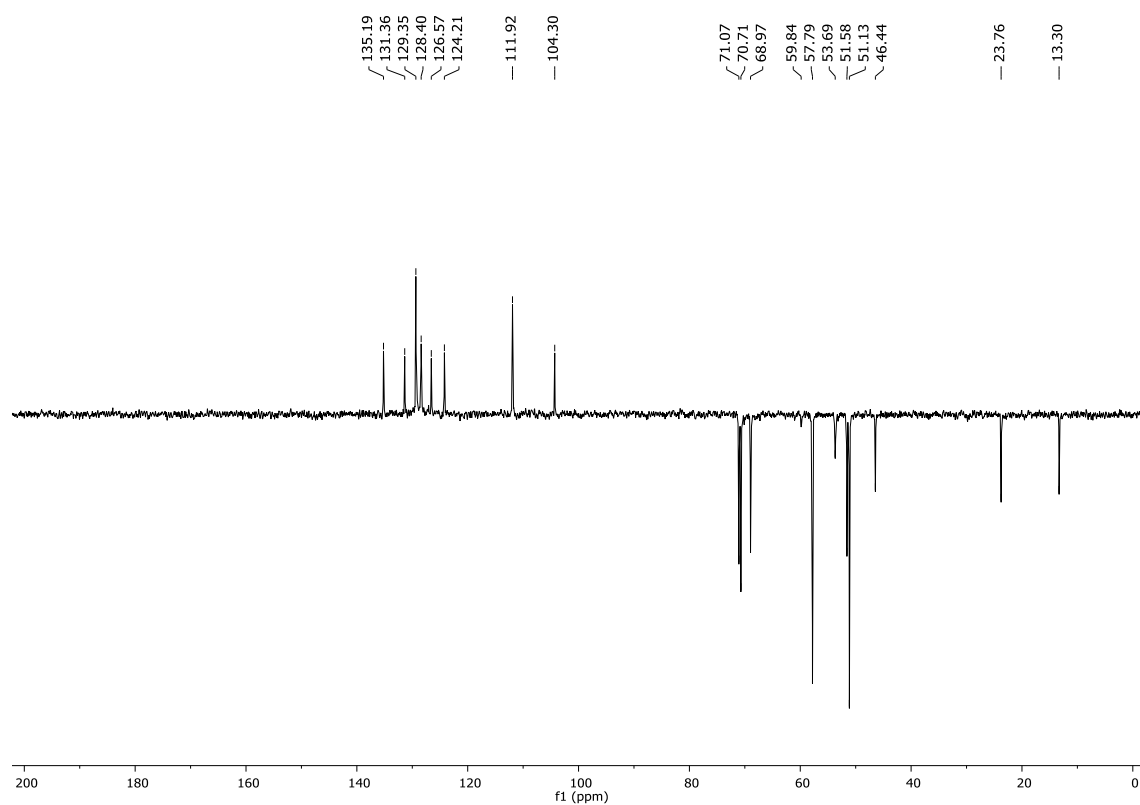

g-COSY

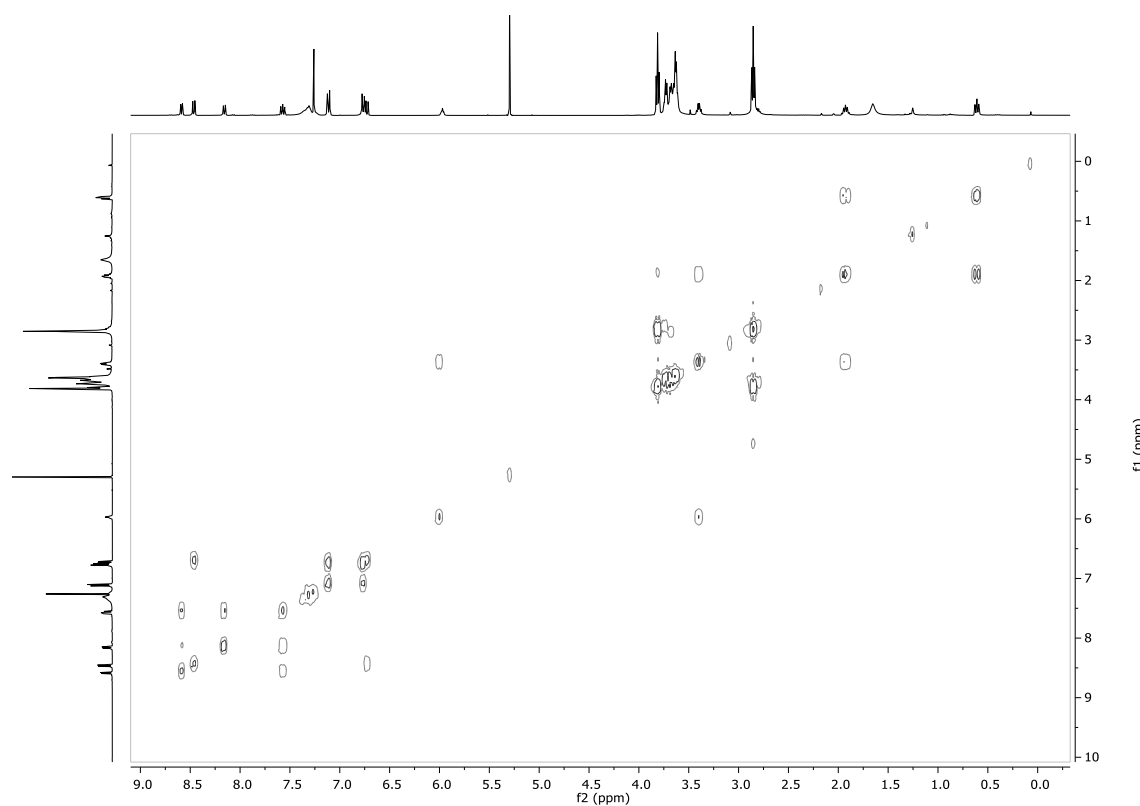

*g*-HSQC

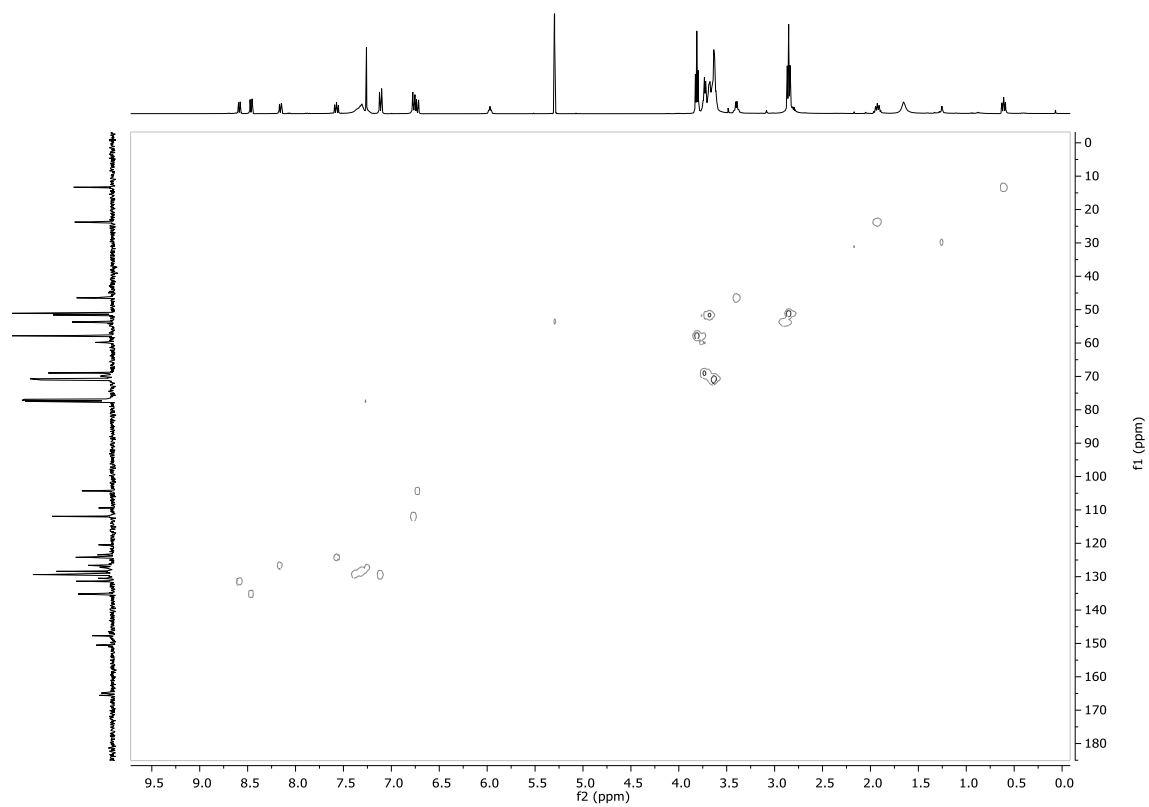

**6-((11-(2,8,9-Trioxa-5-aza-1-silabicyclo[3.3.3]undecan-1-yl)undecyl)amino)-2-(4-(16-benzyl-1,4,10,13-tetraoxa-7,16-diazacyclooctadecan-7-yl)phenyl)-1H-benzo[de]isoquinoline-1,3(2H)-dione (7bb)**

<sup>1</sup>H-NMR

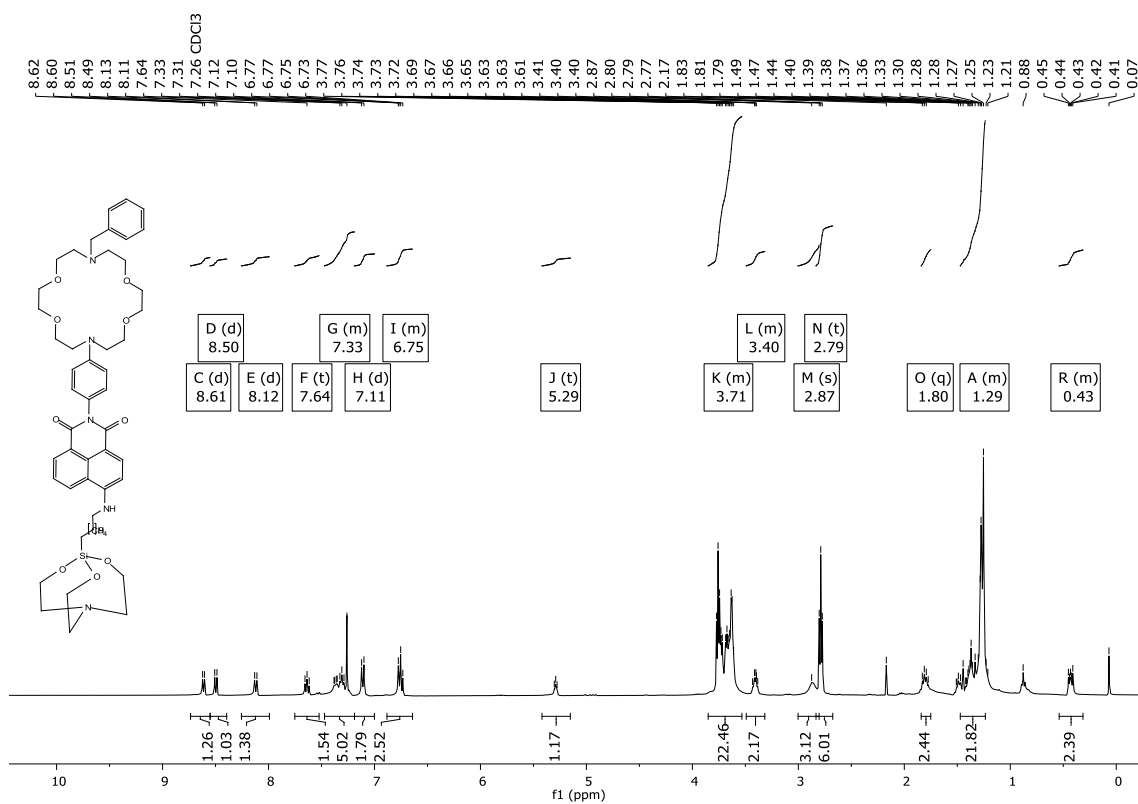

<sup>13</sup>C-NMR

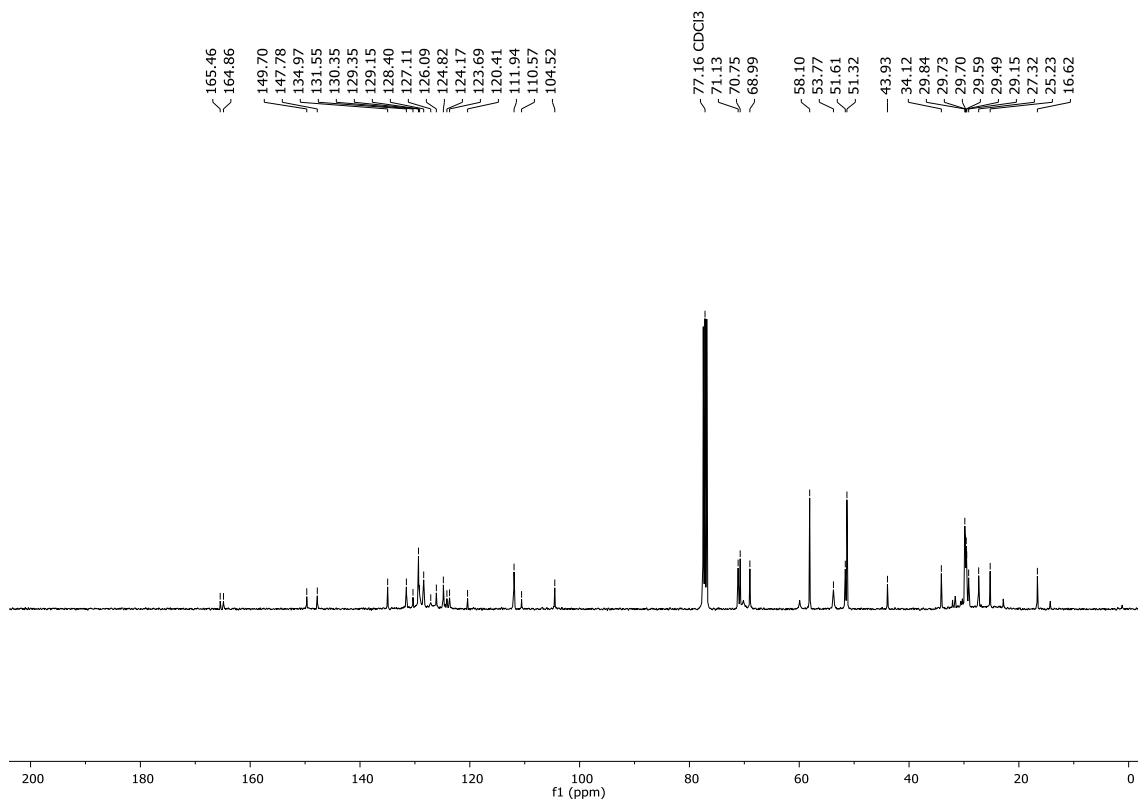

DEPT-135

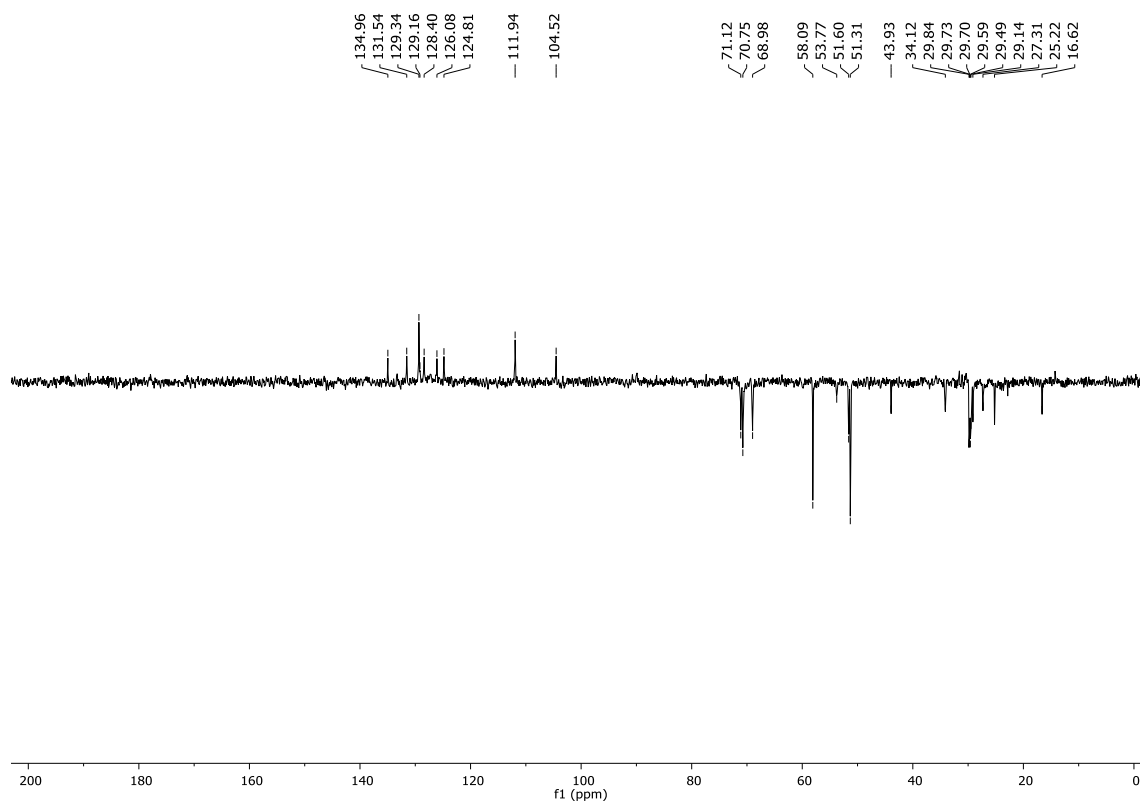

g-COSY

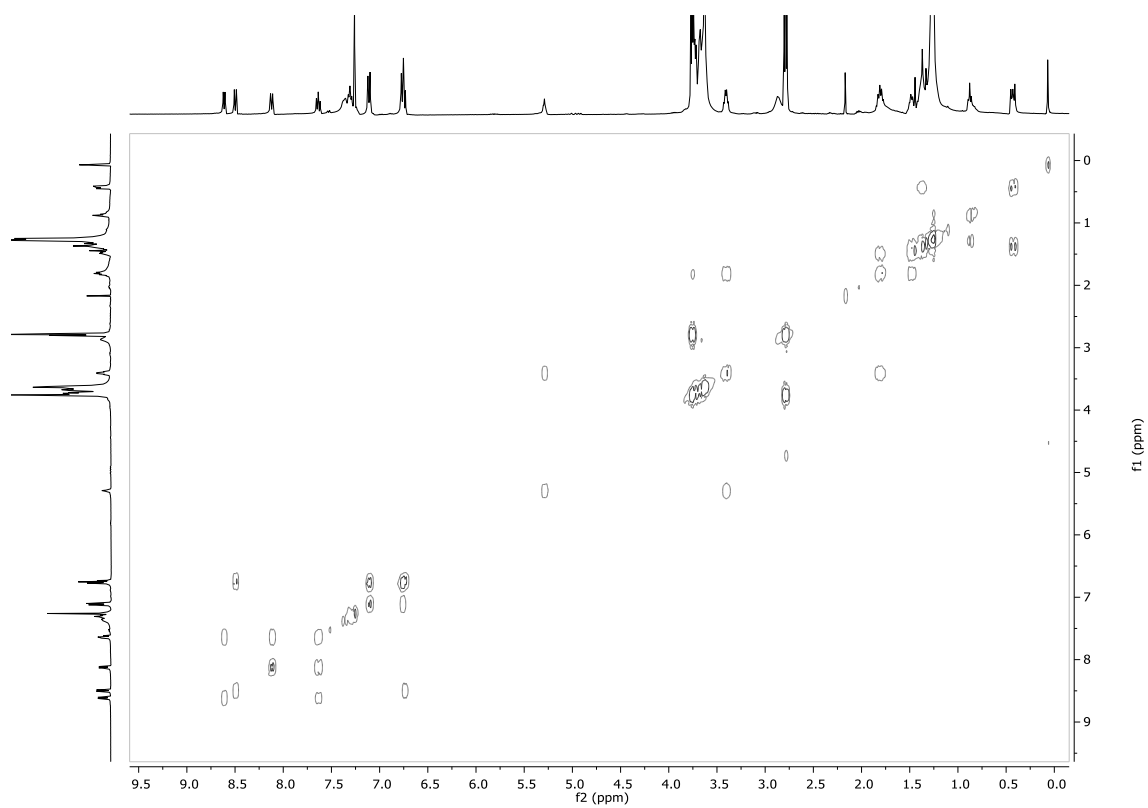

*g*-HSQC

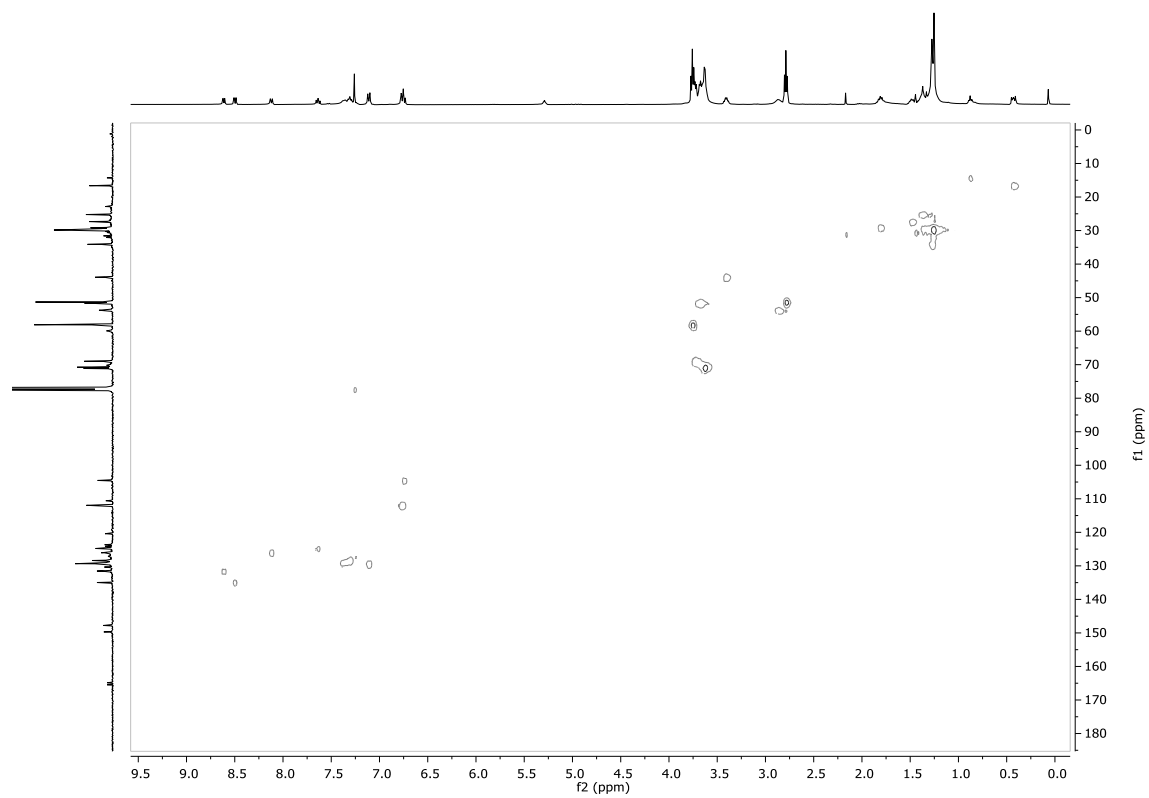

# N-Phenyl-1-aza-18-crown (8a)

<sup>1</sup>H-NMR

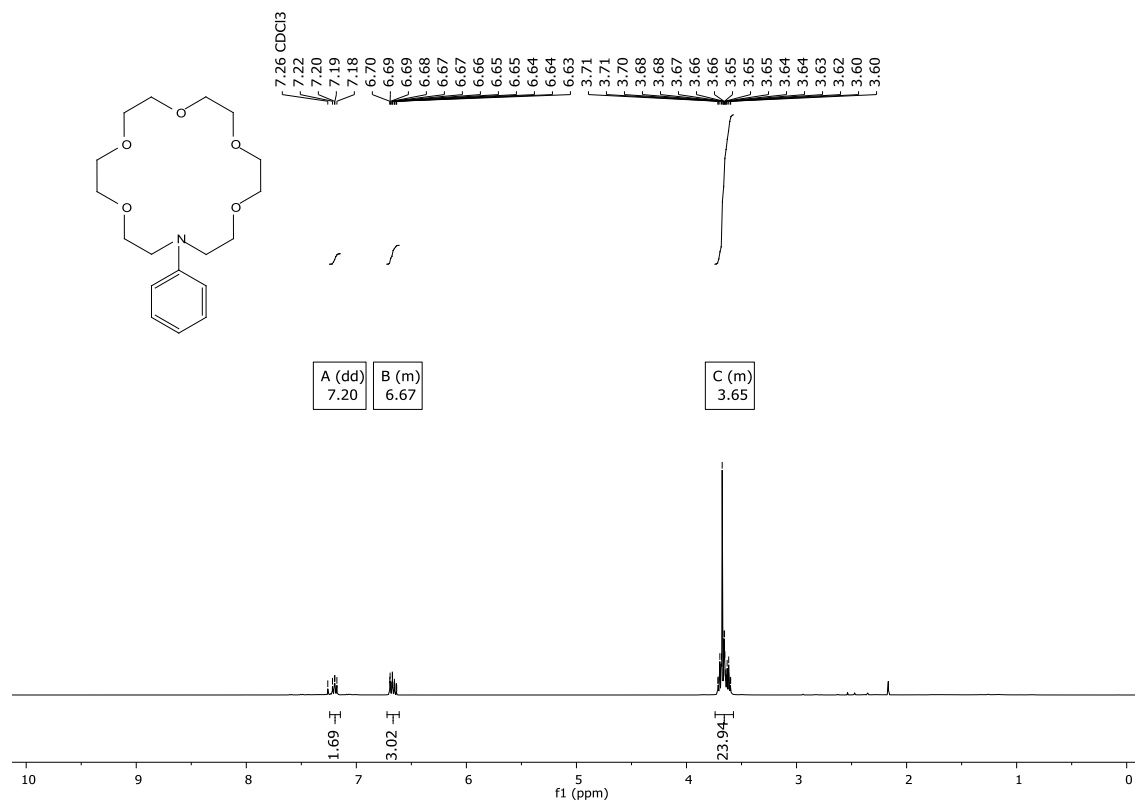

# *N*-Phenyl-1,10-diaza-18-crown-6 (8b)

<sup>1</sup>H-NMR

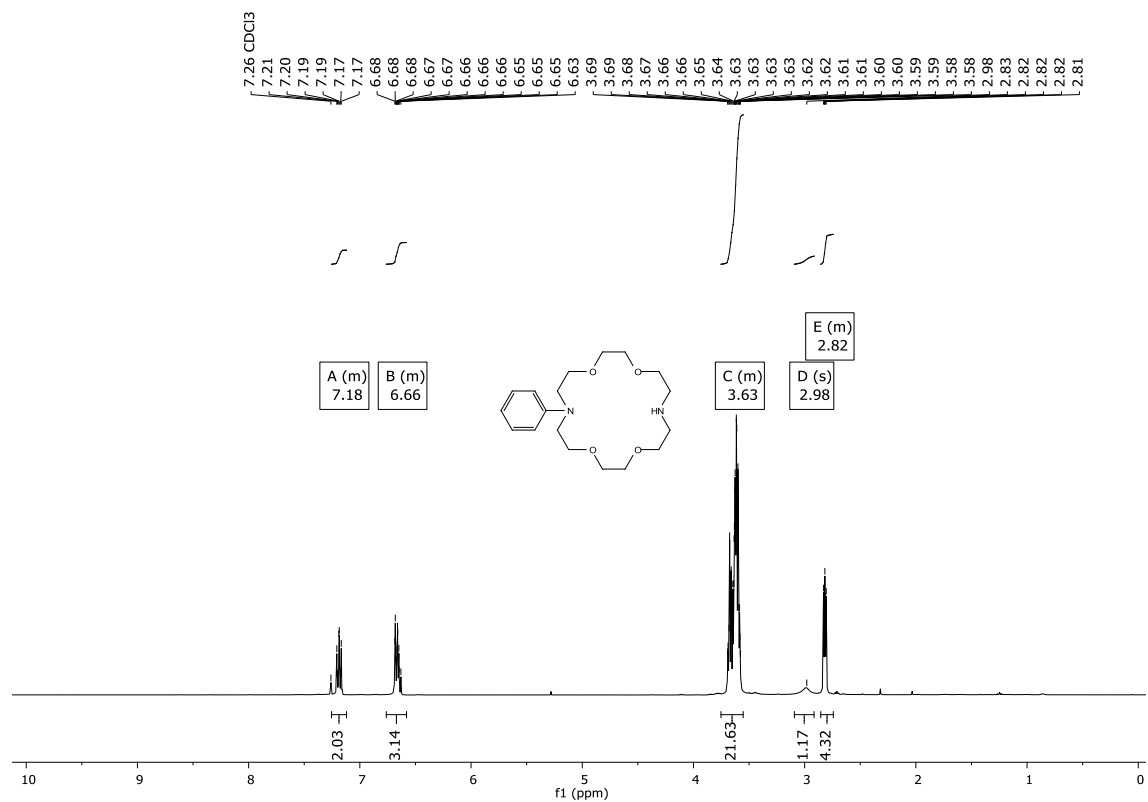

<sup>13</sup>C-NMR

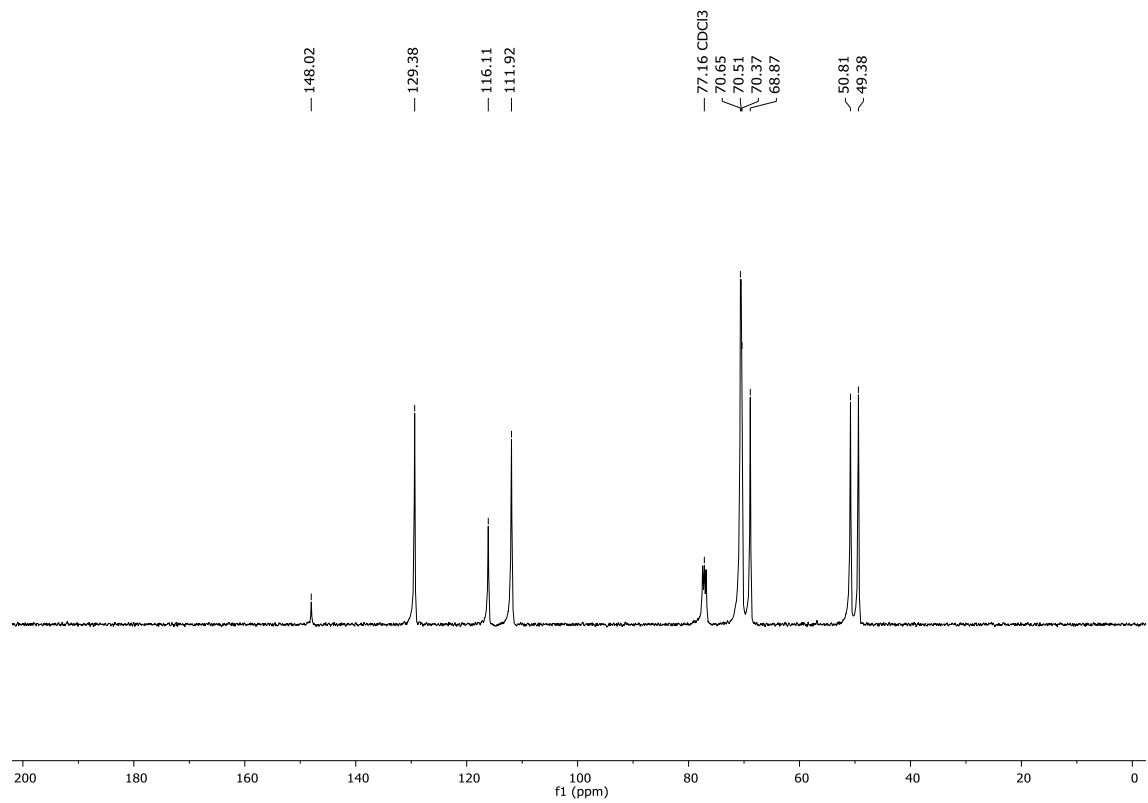



DEPT-135

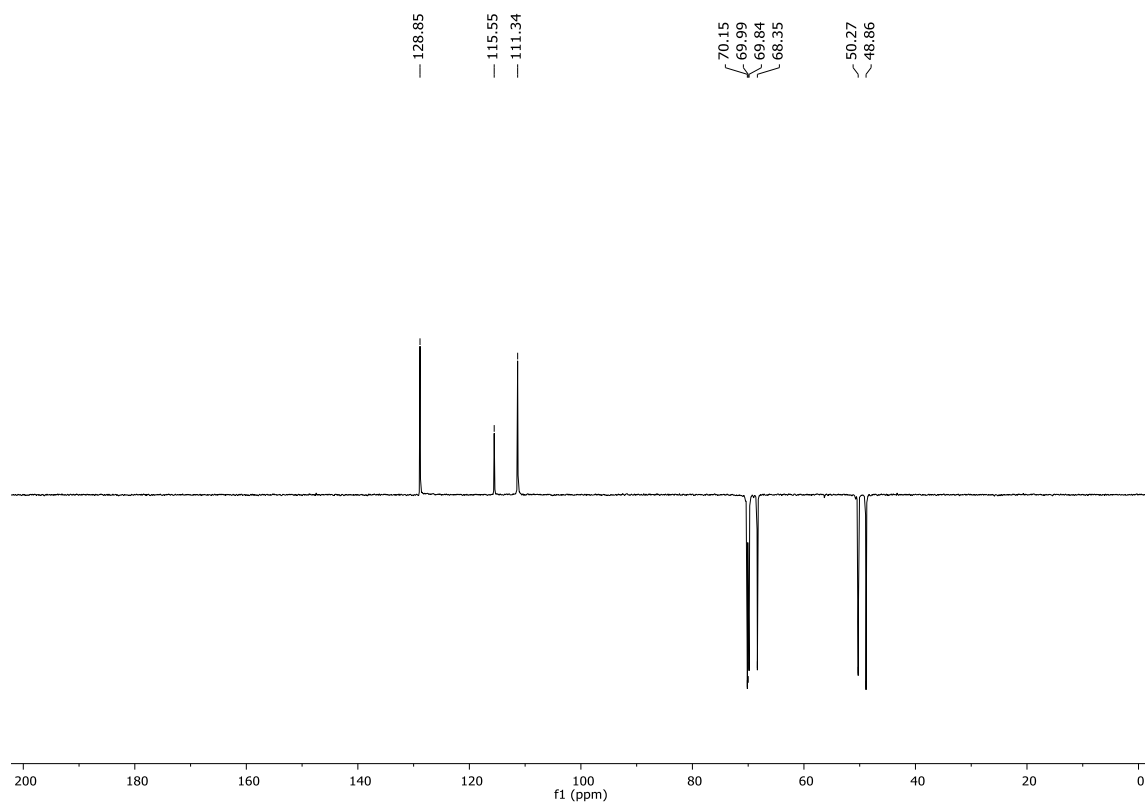

g-COSY

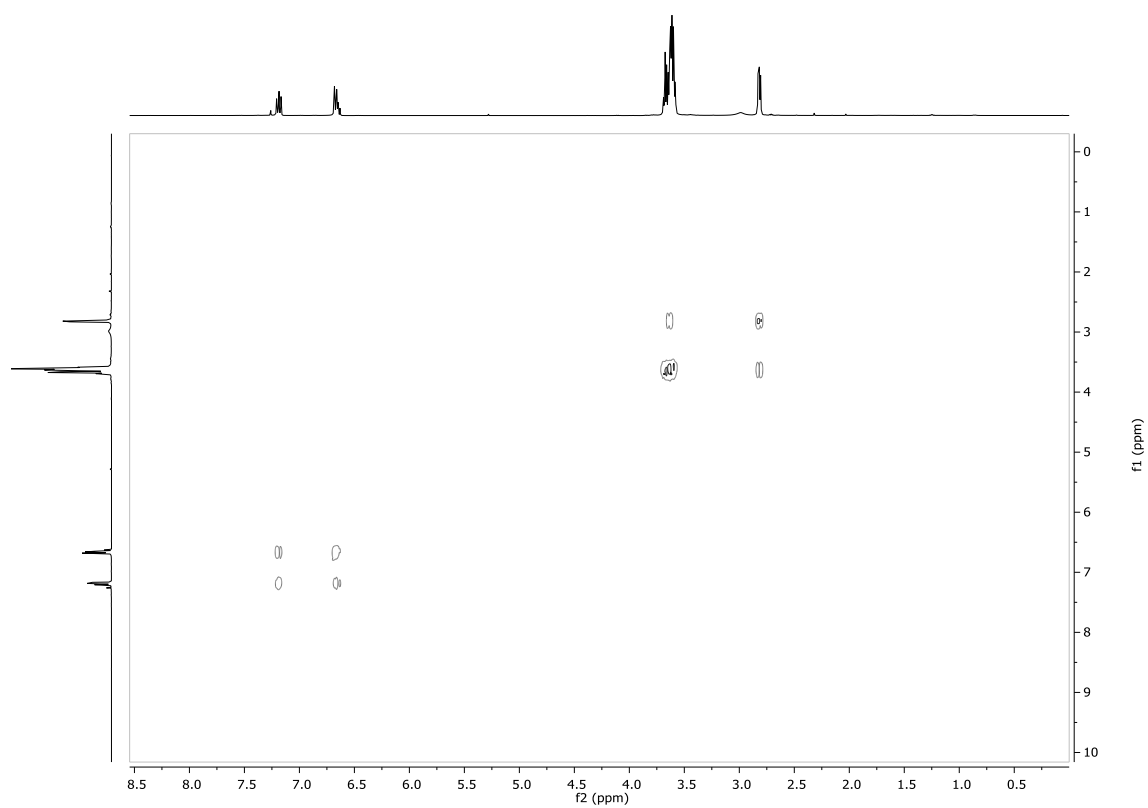

*g*-HSQC

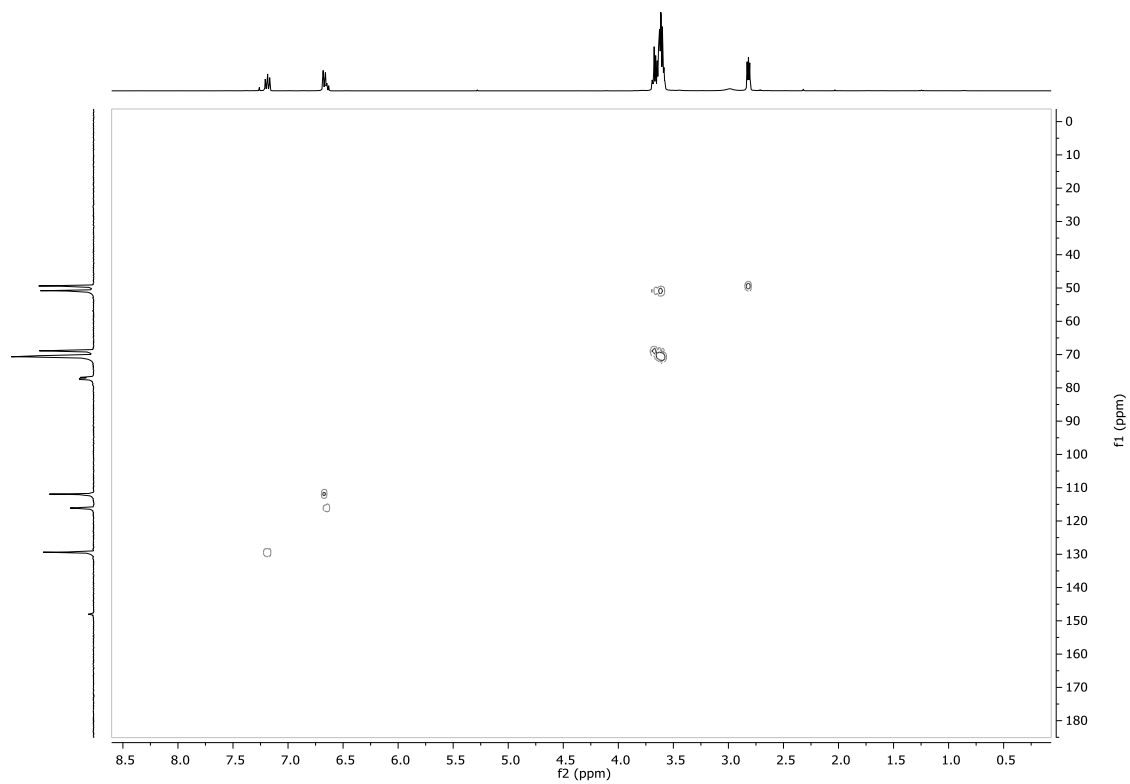

# *N*-(4-iodophenyl)-1-aza-18-crown-6 (9a)

<sup>1</sup>H-NMR

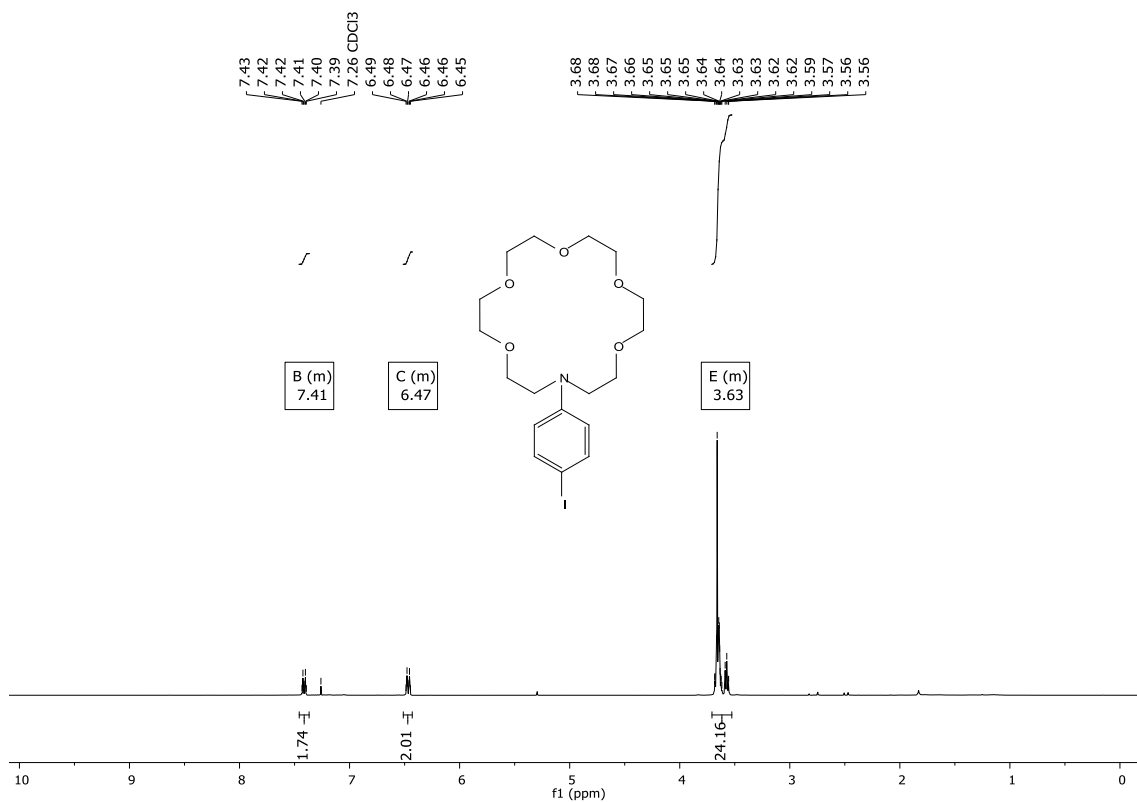

<sup>13</sup>C-NMR

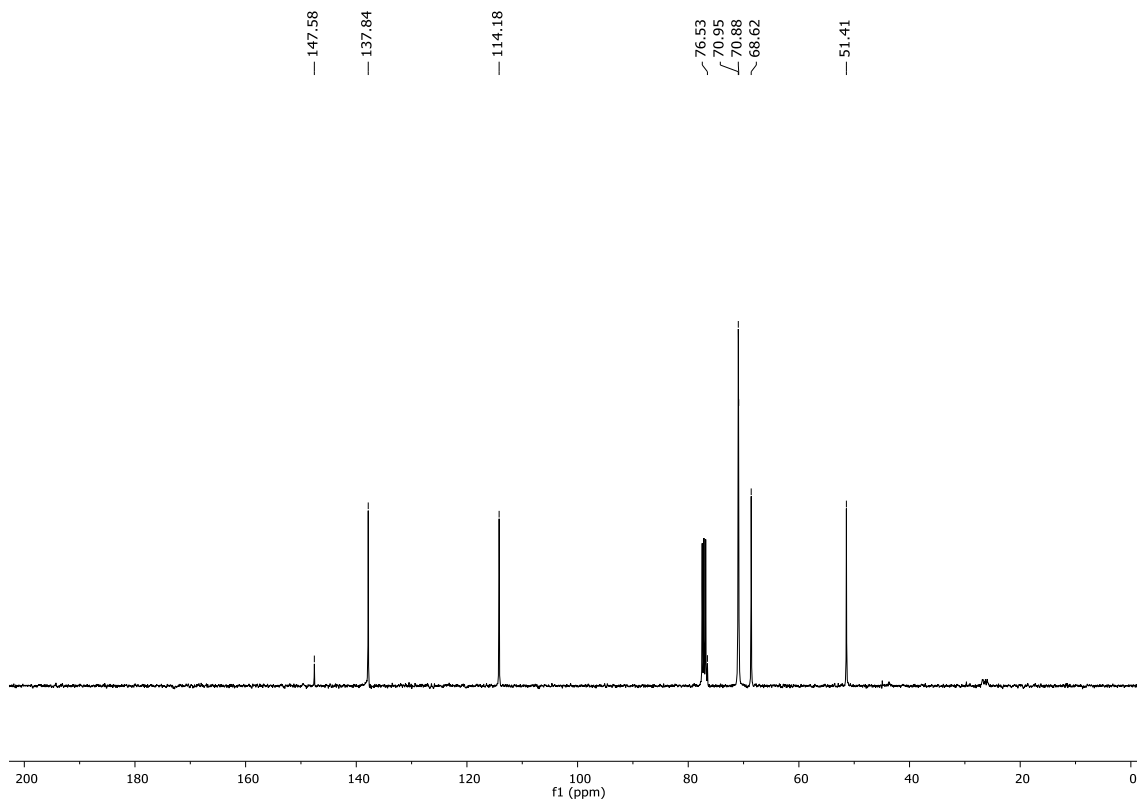

DEPT-135

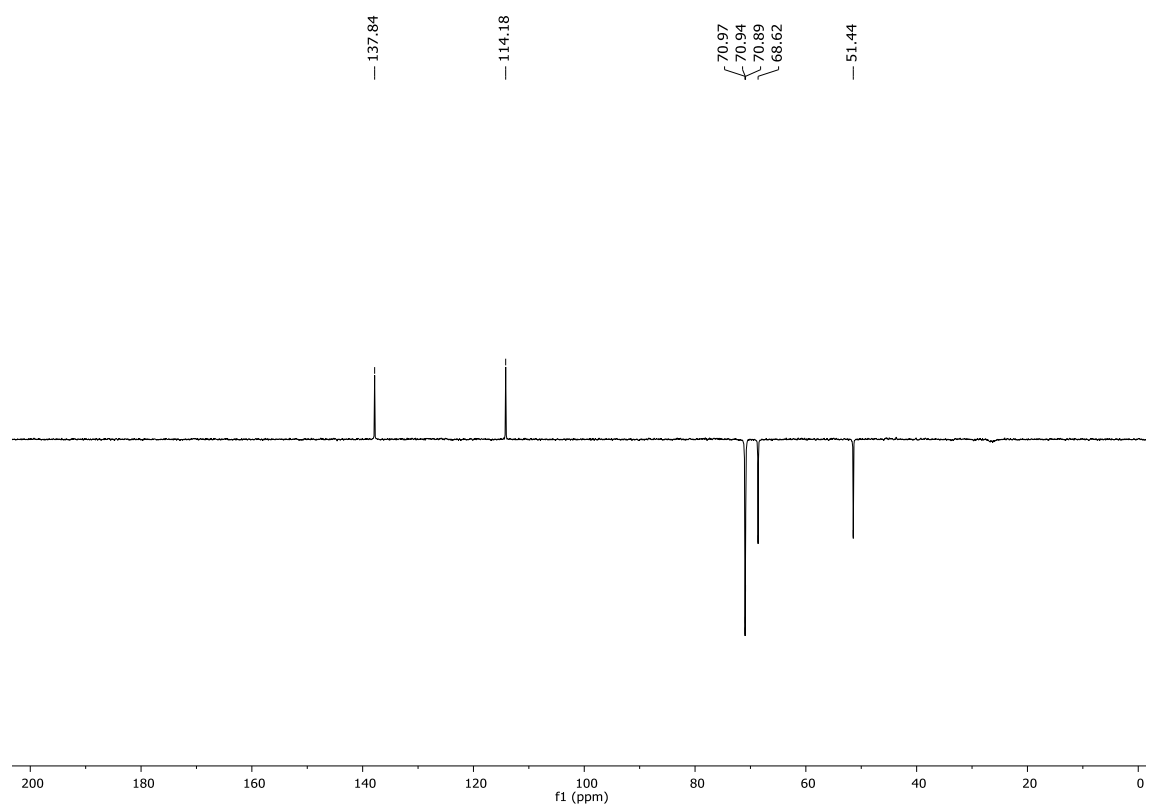

g-COSY

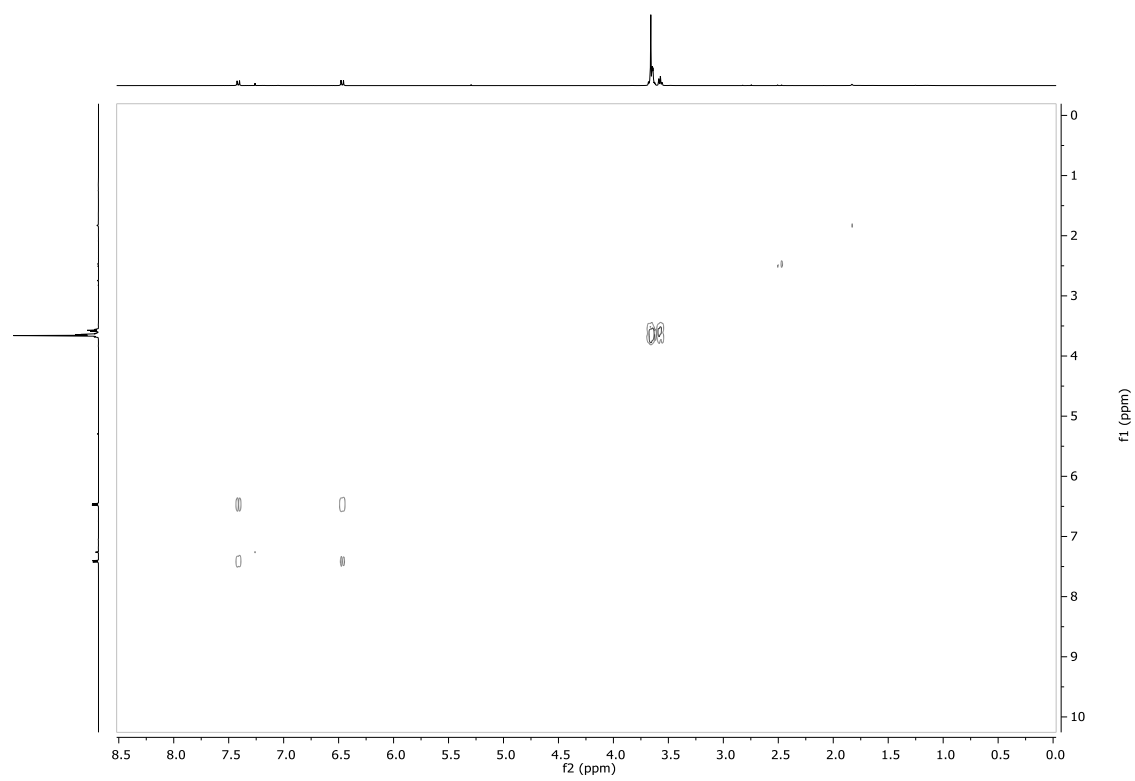

*g*-HSQC

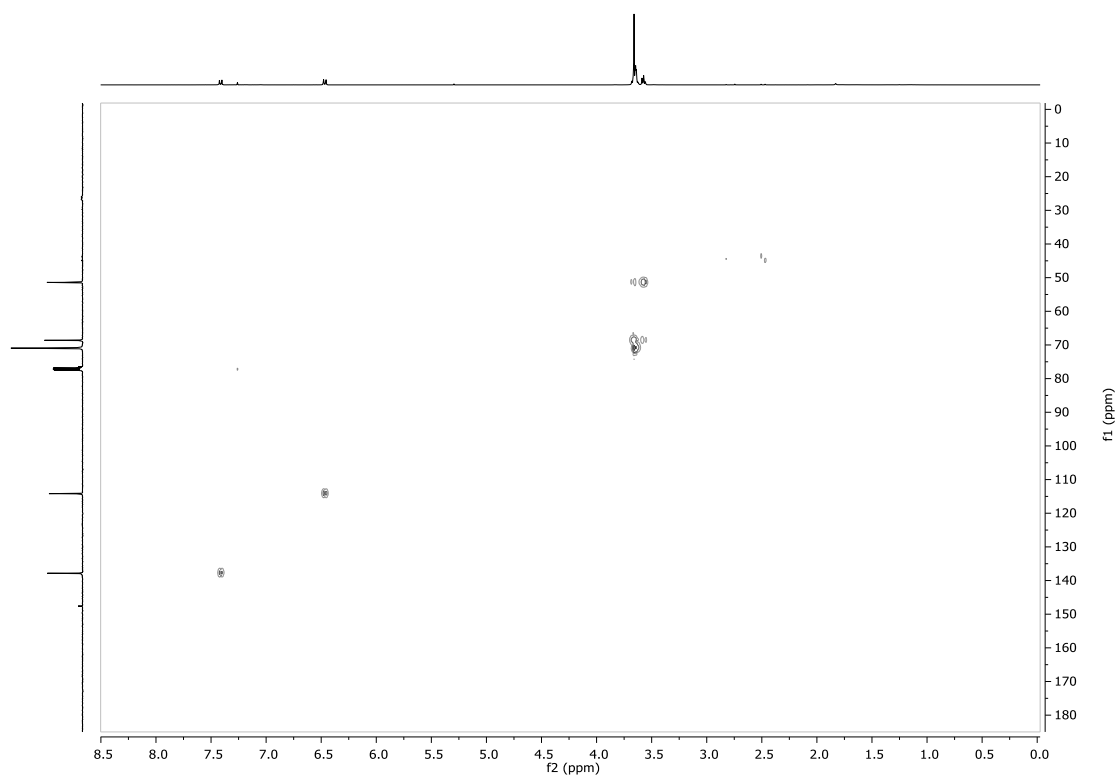

# *N*-(4-iodophenyl)-1,10-diaza-18-crown-6 (9b)

<sup>1</sup>H-NMR

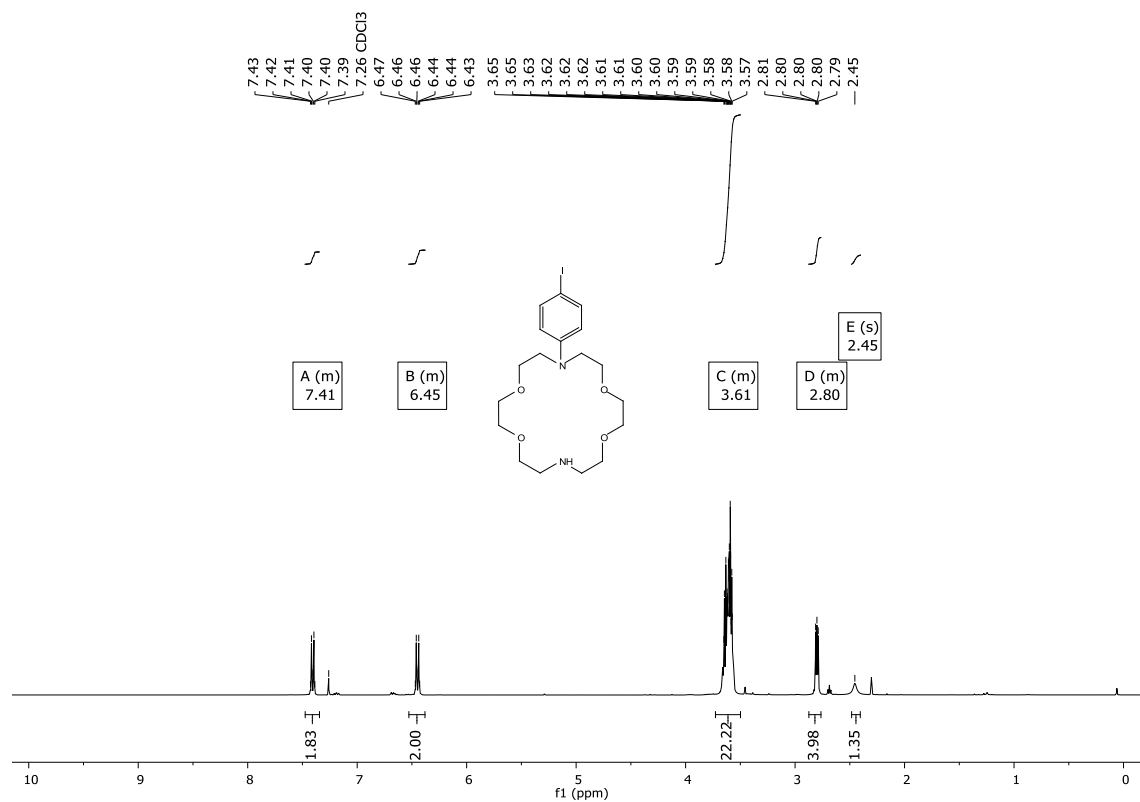

<sup>13</sup>C-NMR

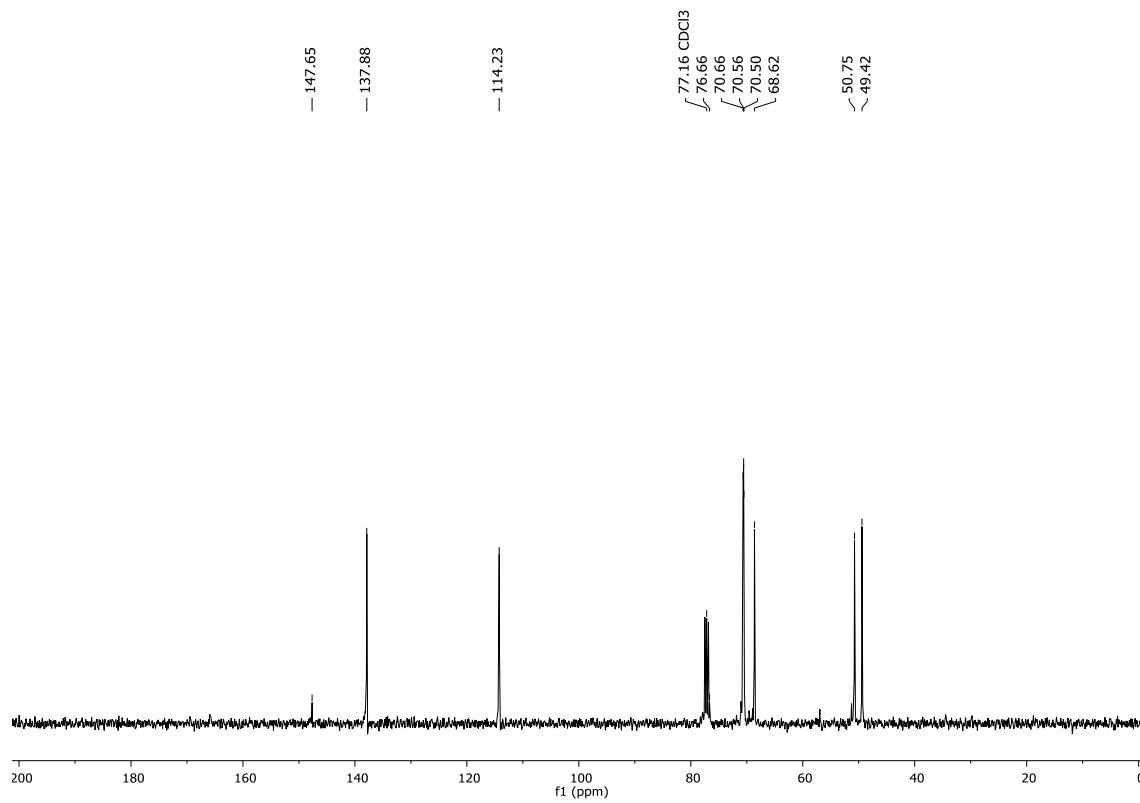

DEPT-135

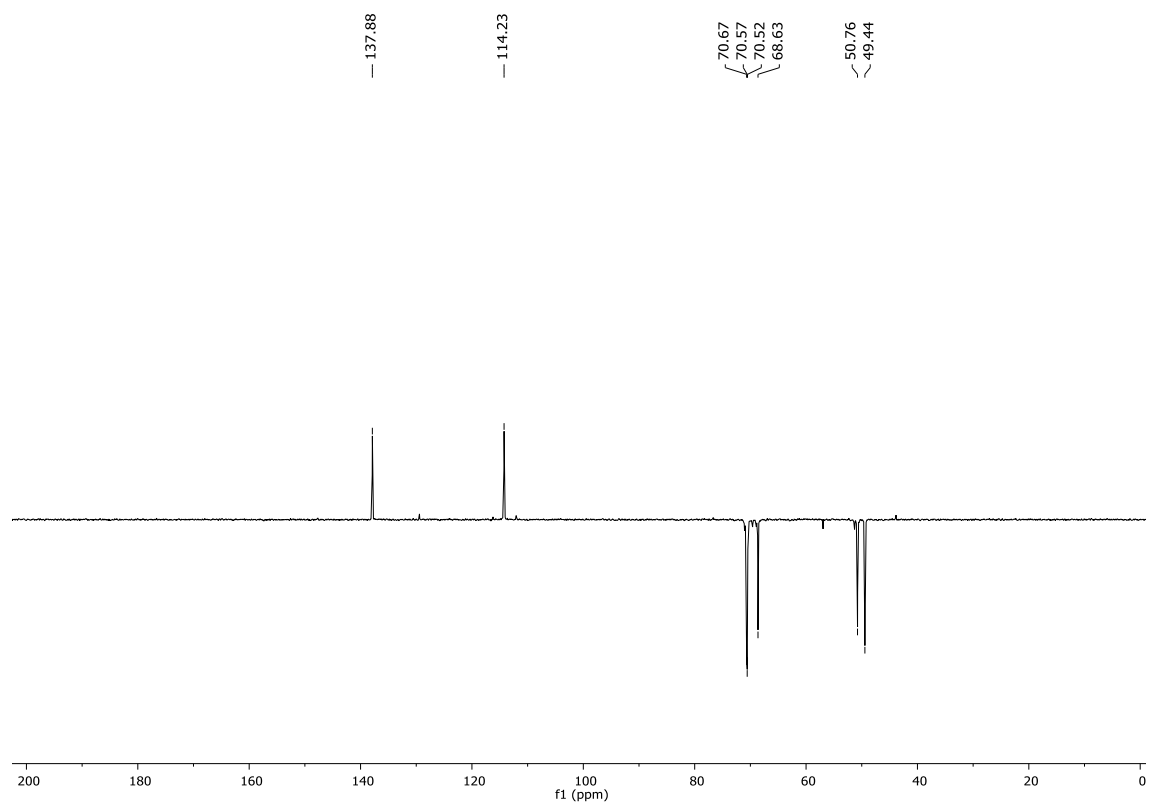

g-COSY

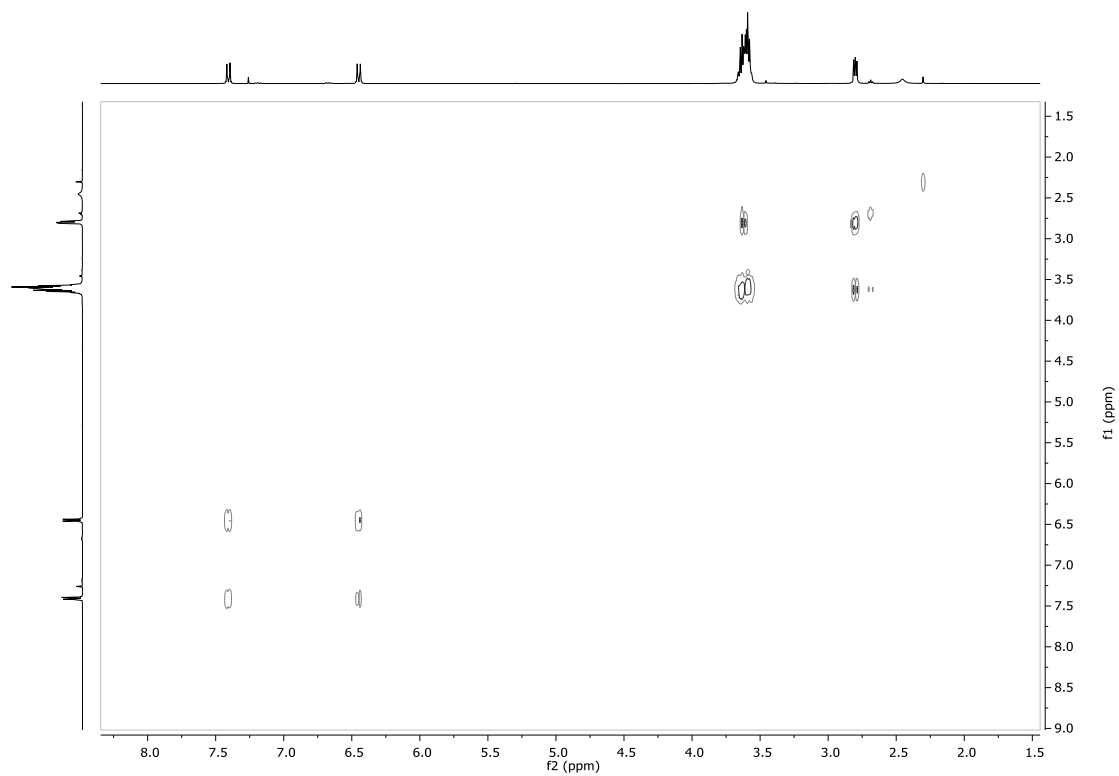

*g*-HSQC

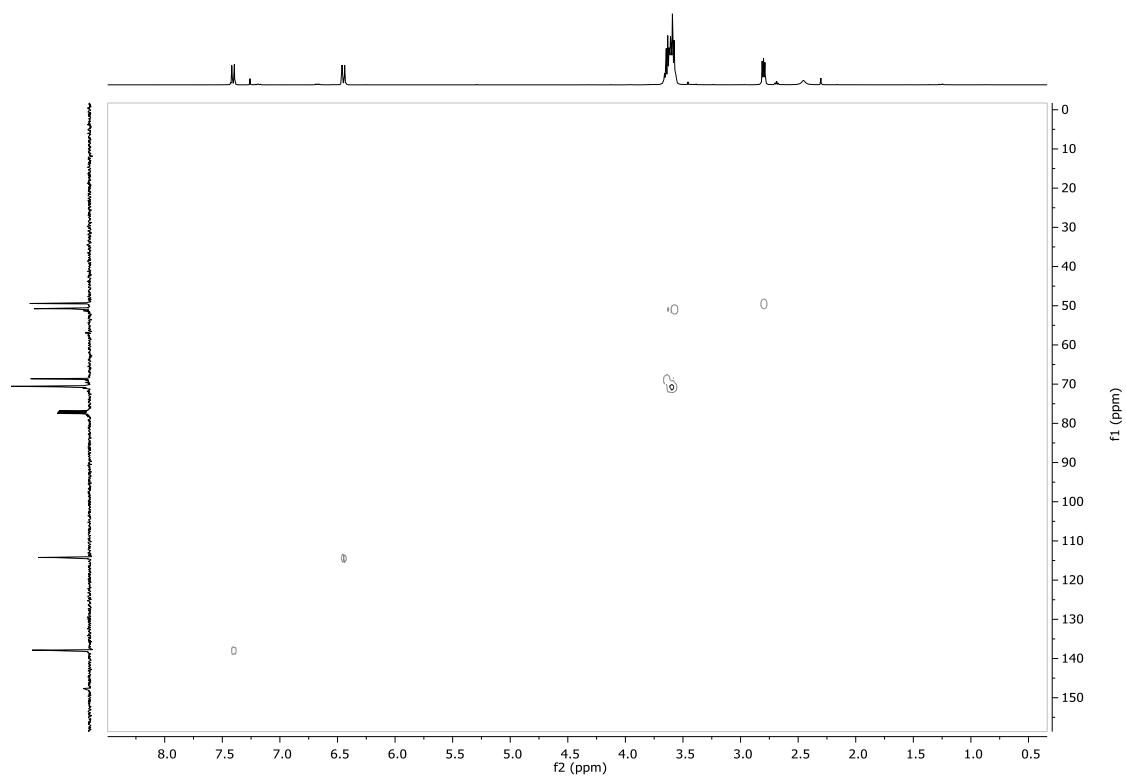



# 7-Benzyl-16-(4-iodophenyl)-1,4,10,13-tetraoxa-7,16-diazacyclooctadecane (9c)

## <sup>1</sup>H-NMR

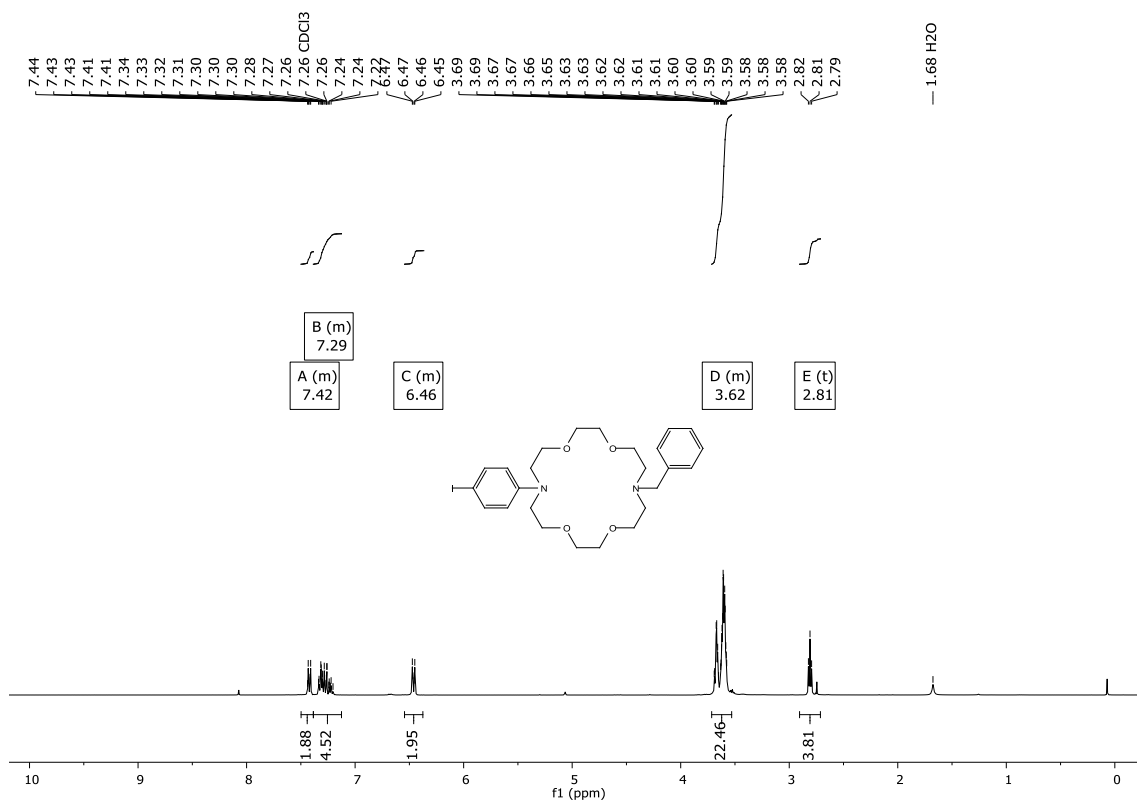

## <sup>13</sup>C-NMR

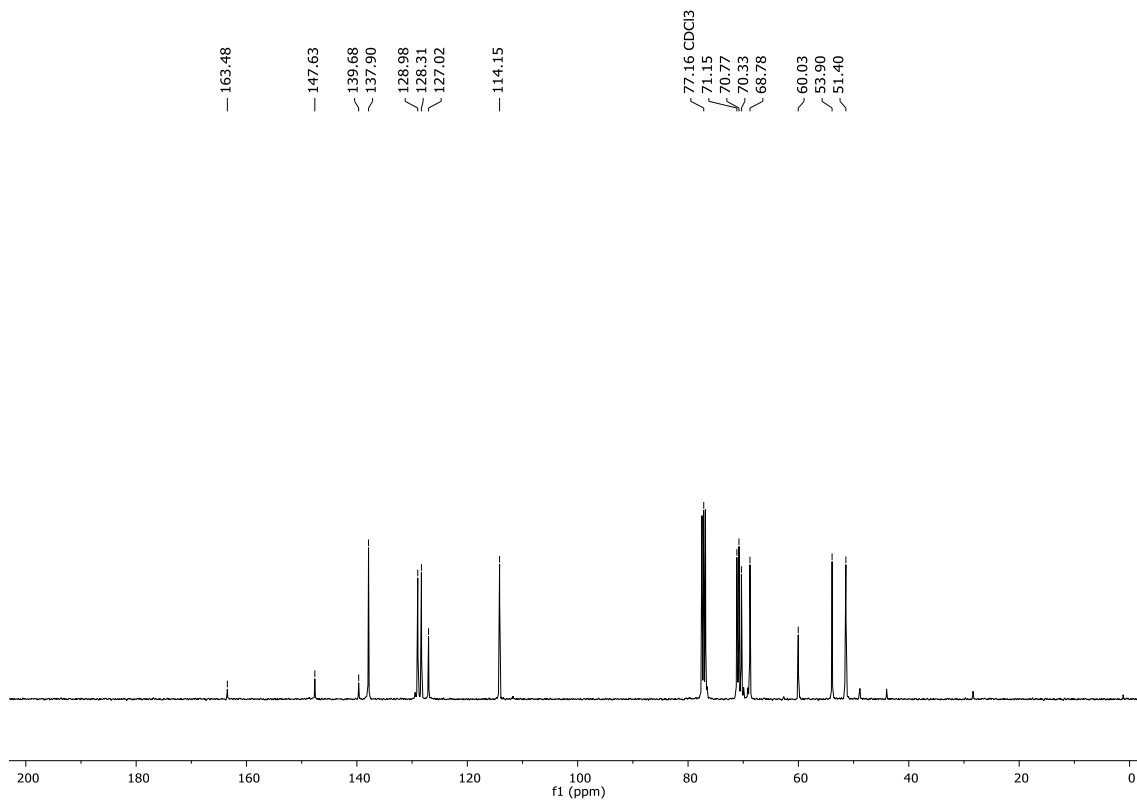

DEPT-135

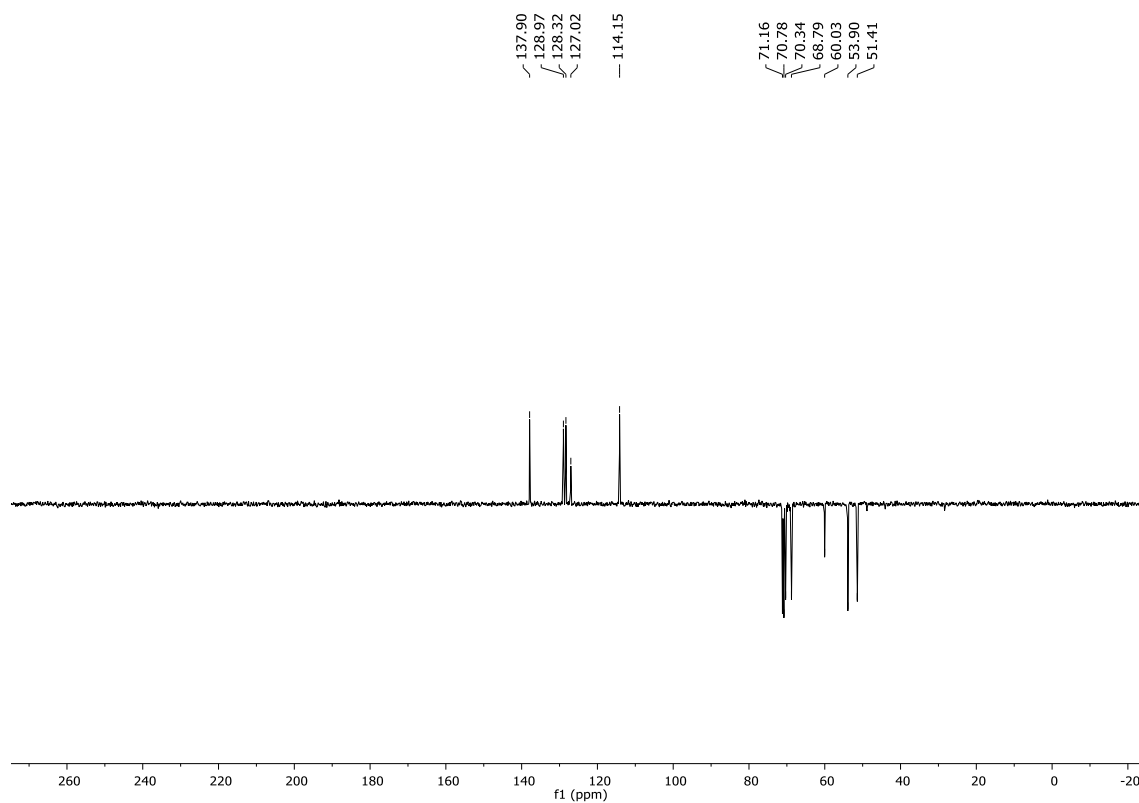

g-COSY

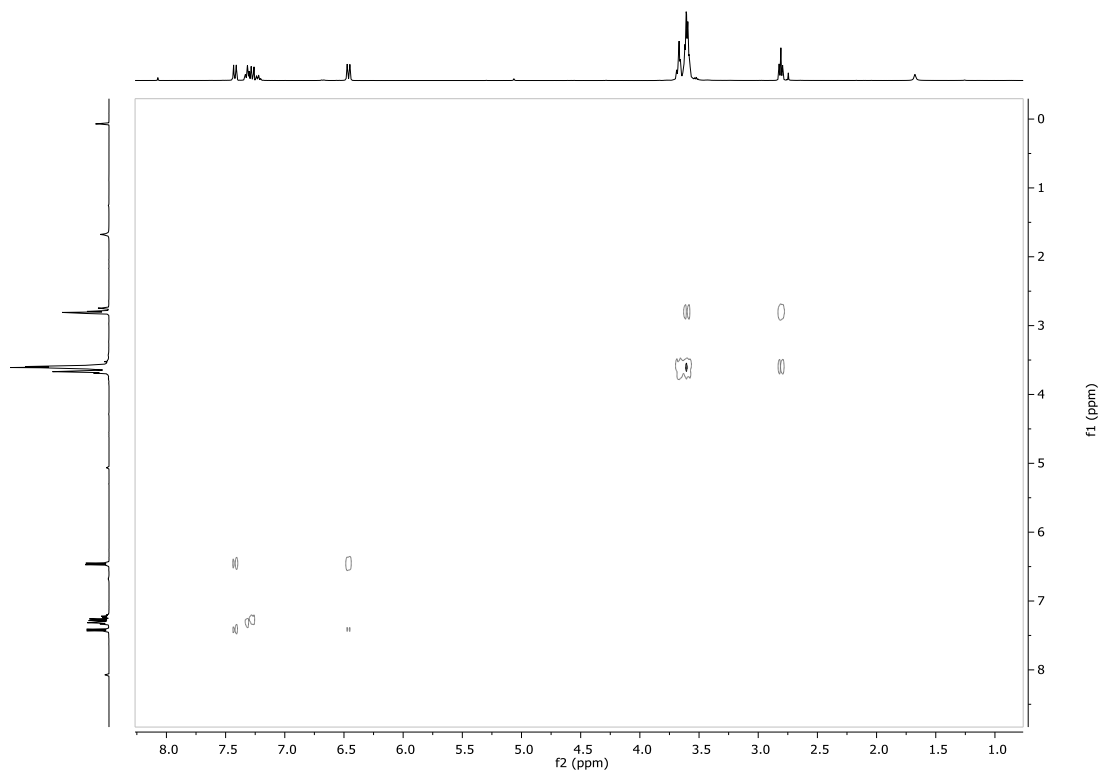

*g*-HSQC

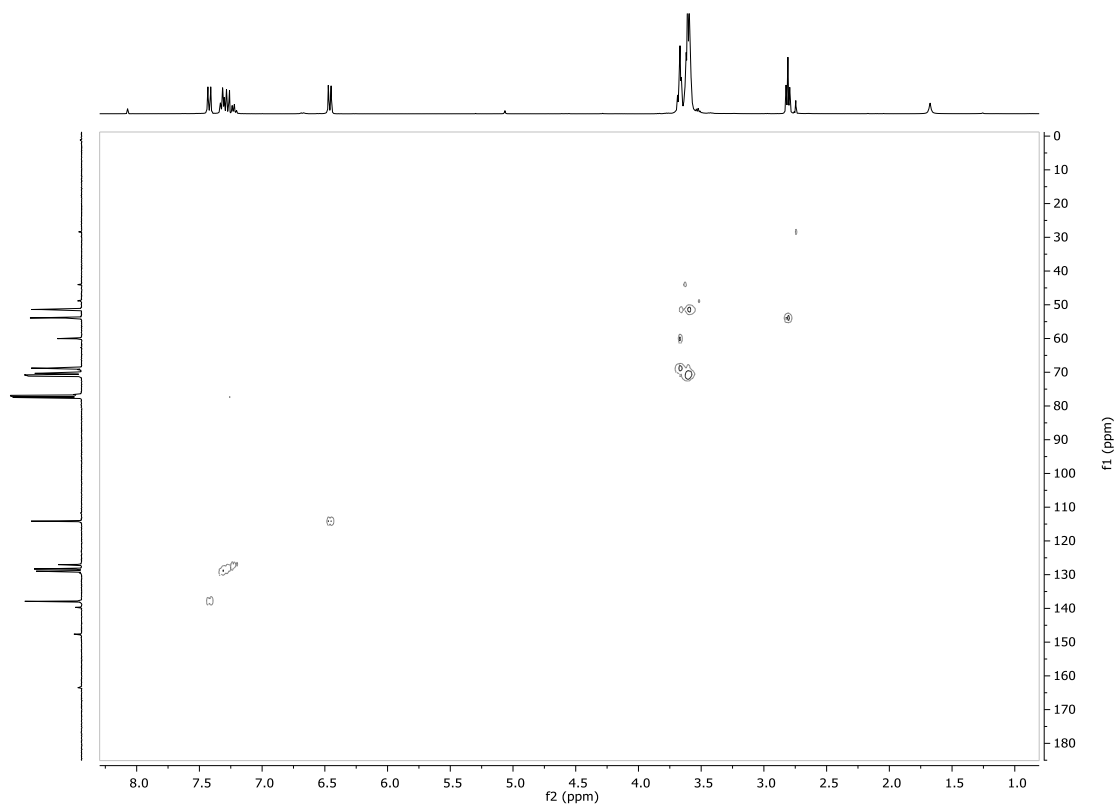

***N*-(4-(4,4,5,5-tetramethyl-1,3,2-dioxaborolan-2-yl)phenyl)-1-aza-18-crown-6 (10a)**

<sup>1</sup>H-NMR

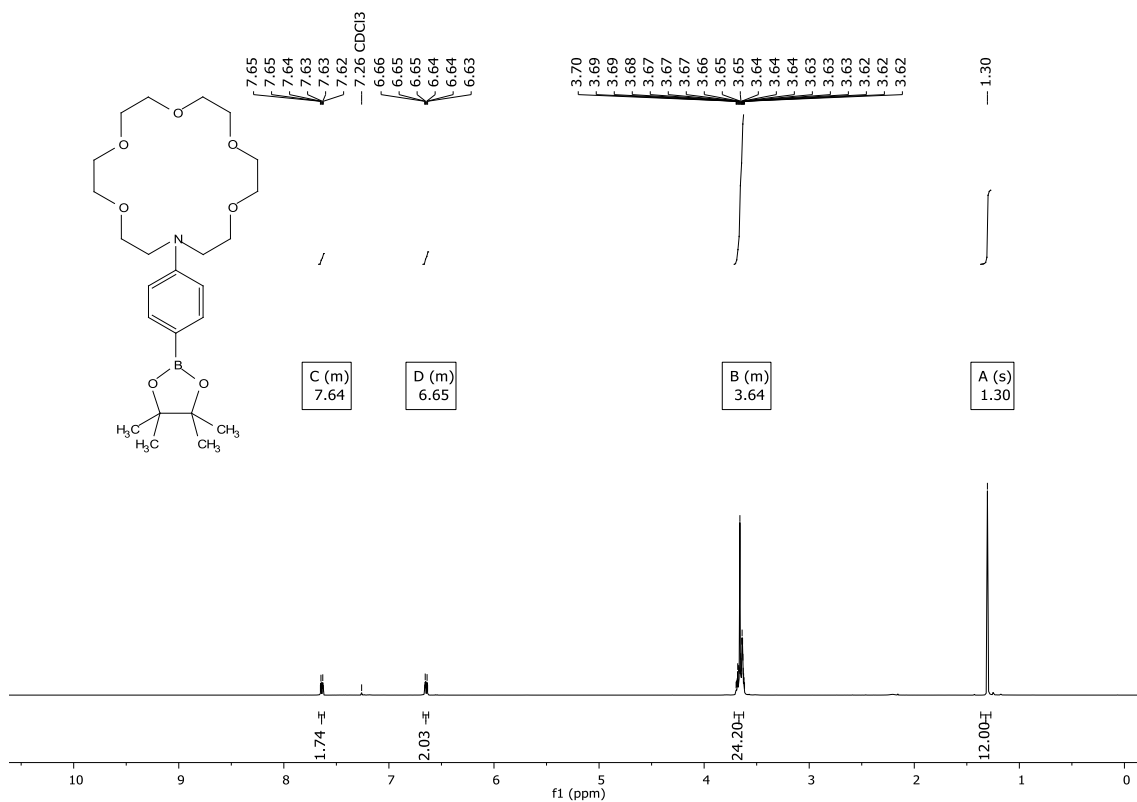

<sup>13</sup>C-NMR

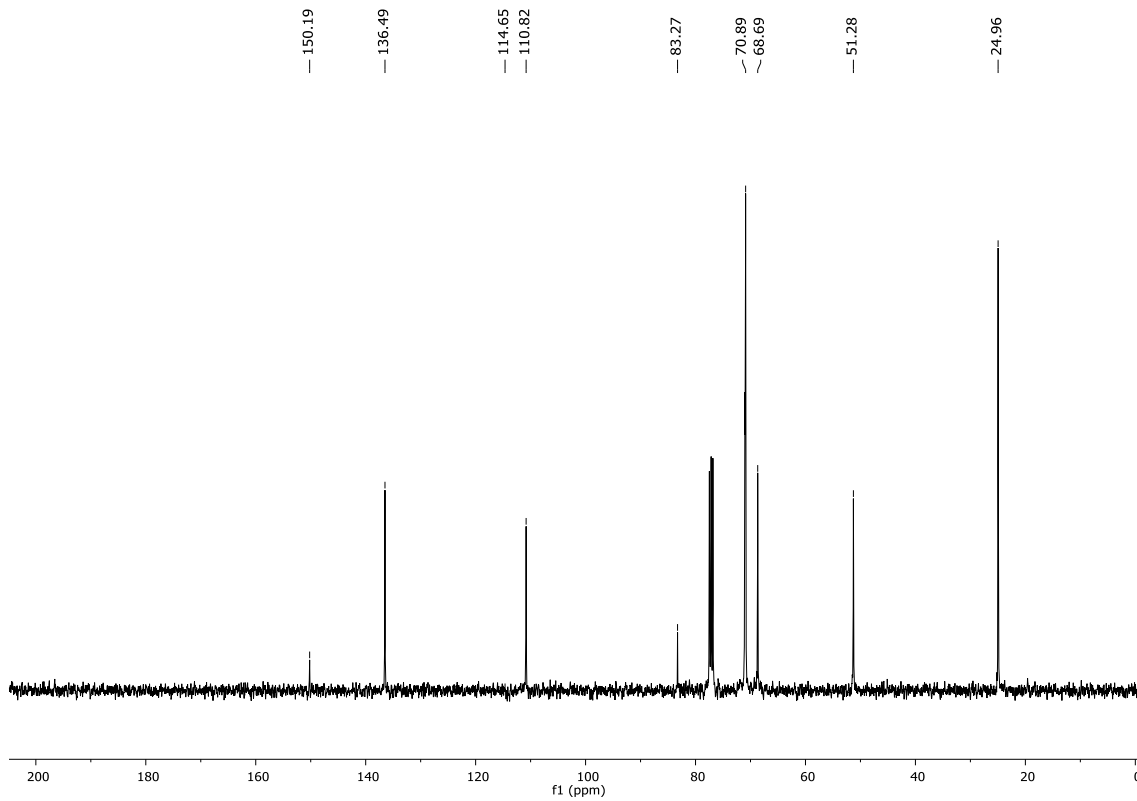

DEPT-135

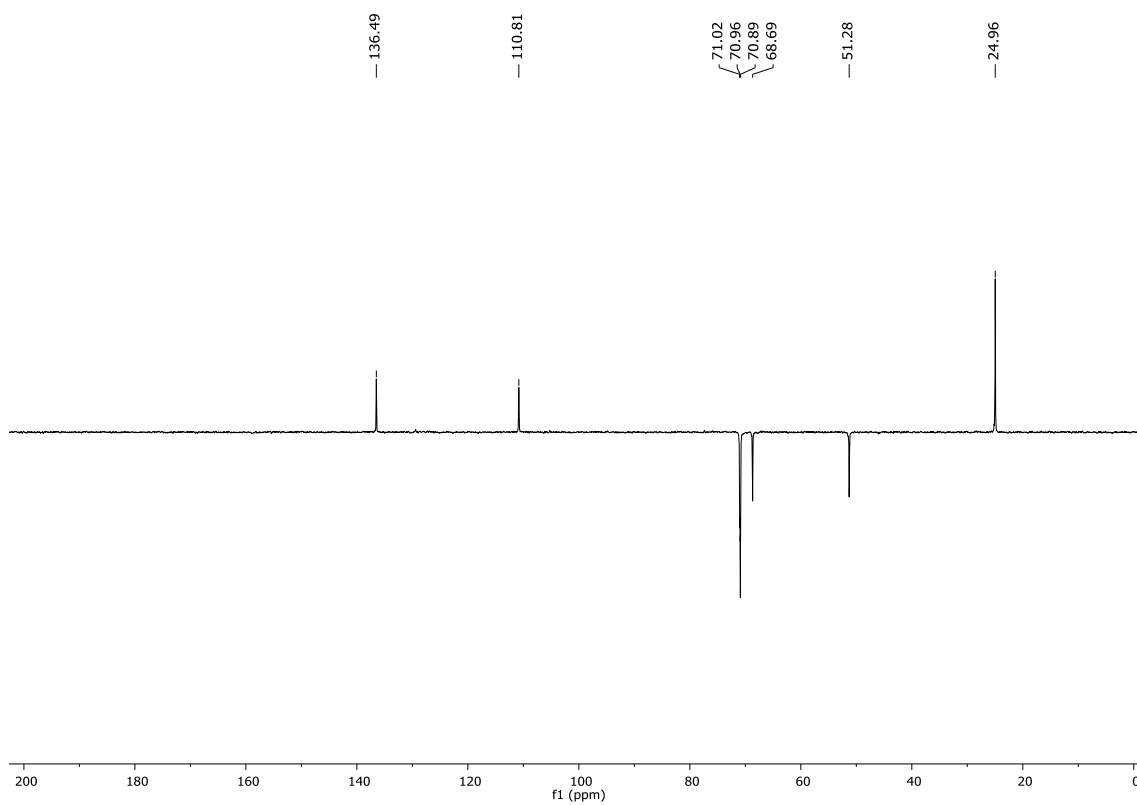

g-COSY

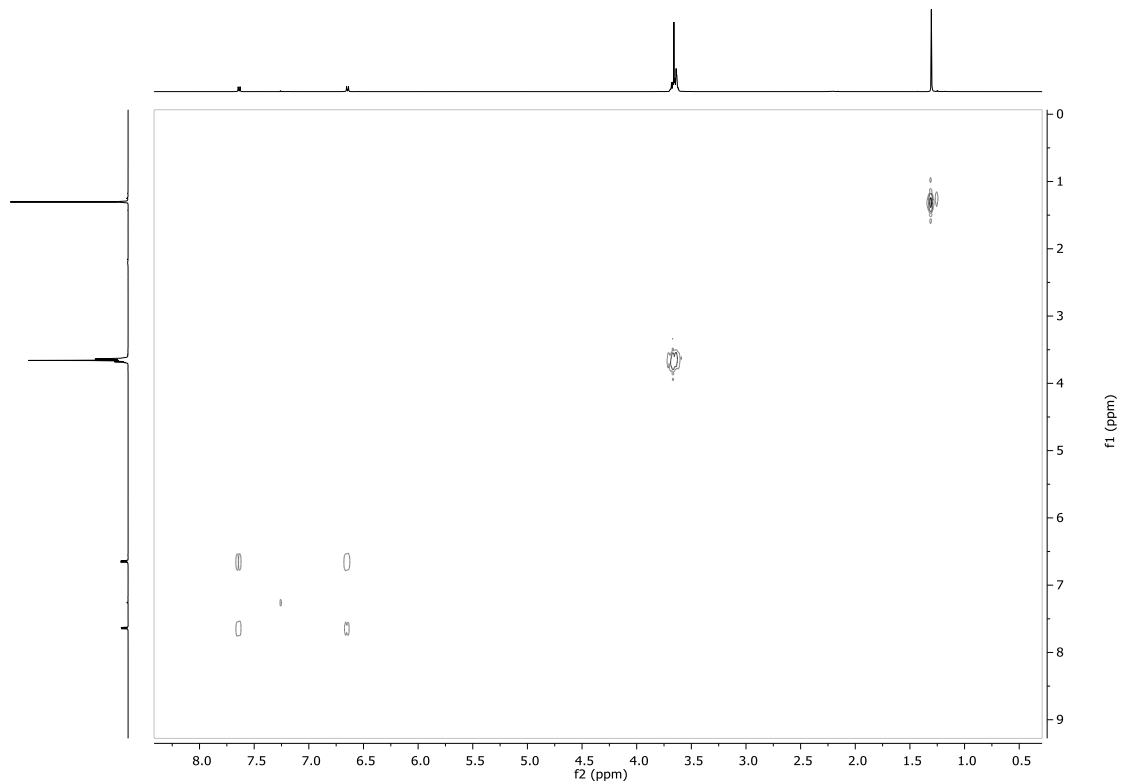

*g*-HSQC

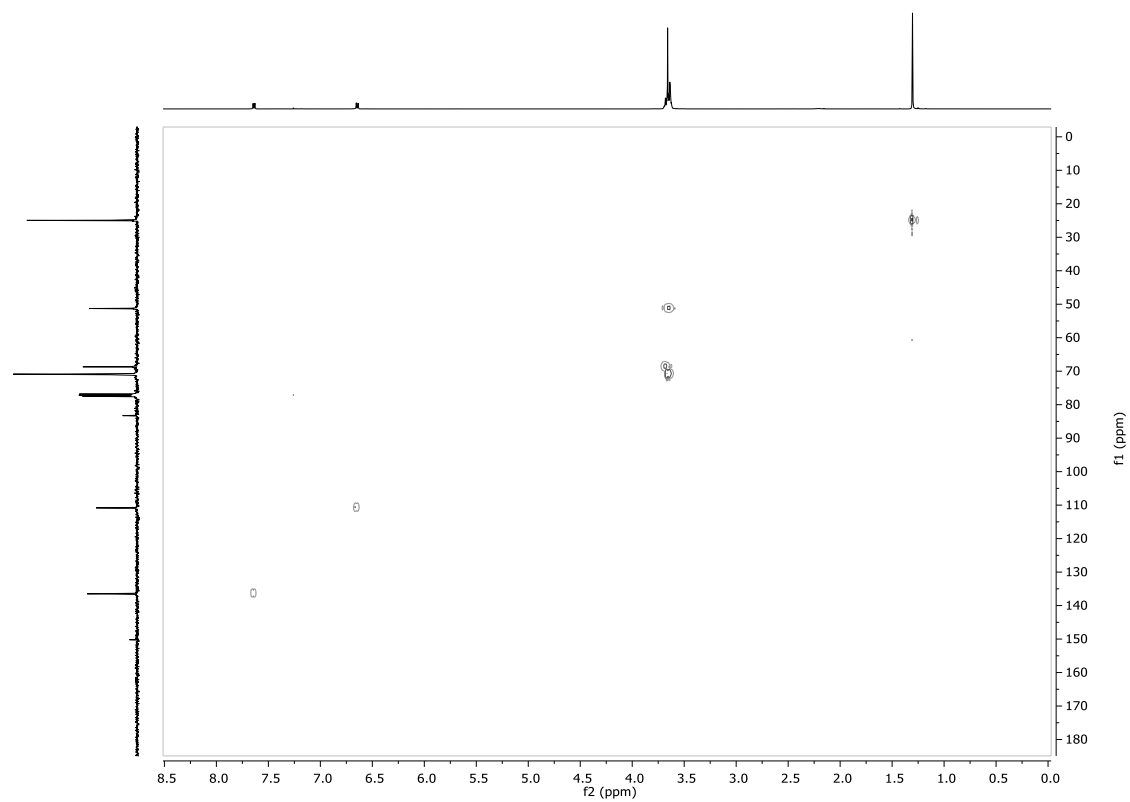

*g*-HMBC

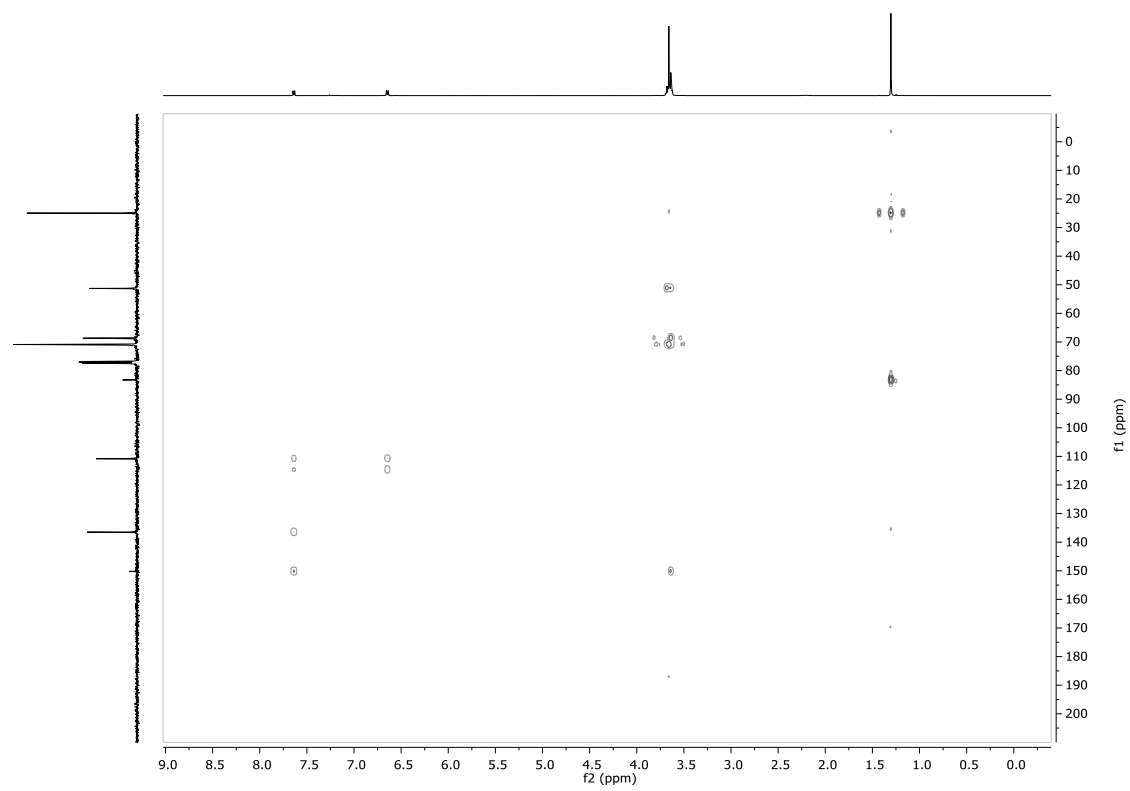

**7-Benzyl-16-(4-(4,4,5,5-tetramethyl-1,3,2-dioxaborolan-2-yl)phenyl)-1,4,10,13-tetraoxa-7,16-diazacyclooctadecane (10b)**

<sup>1</sup>H-NMR

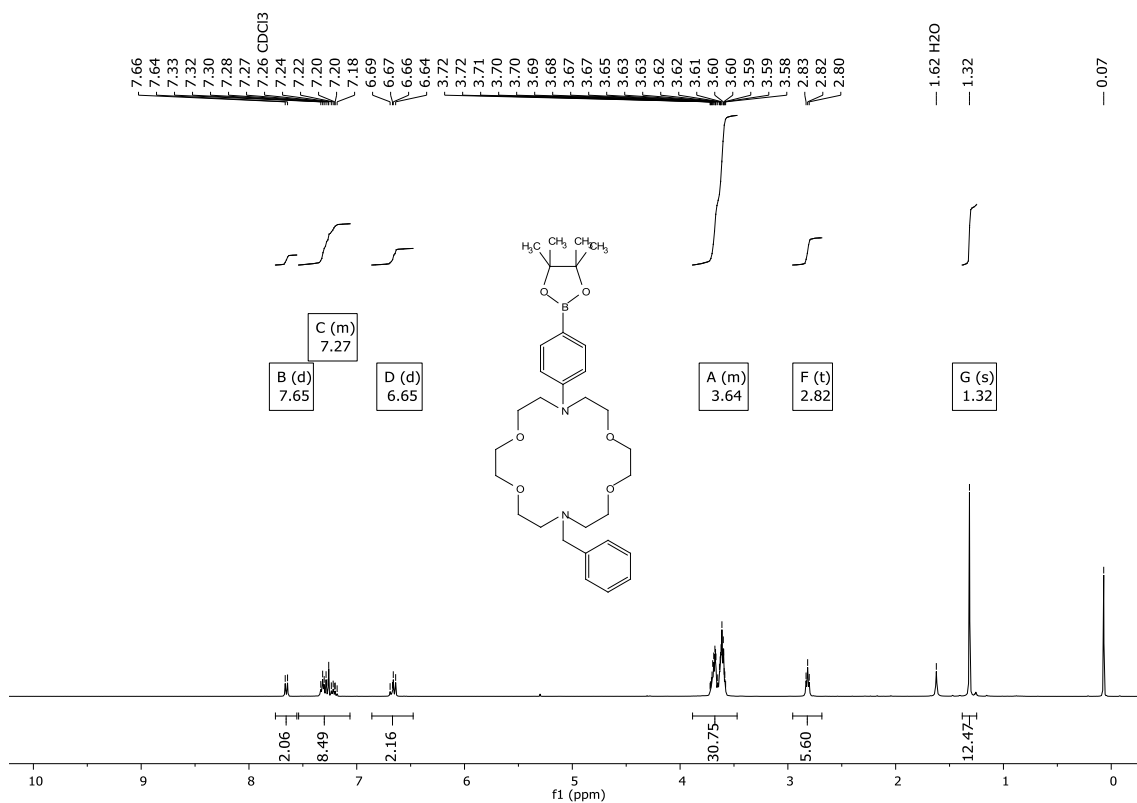

# Methyl 2-chloroimidazo[1,2-a]pyridine-7-carboxylate (12a)

<sup>1</sup>H-NMR

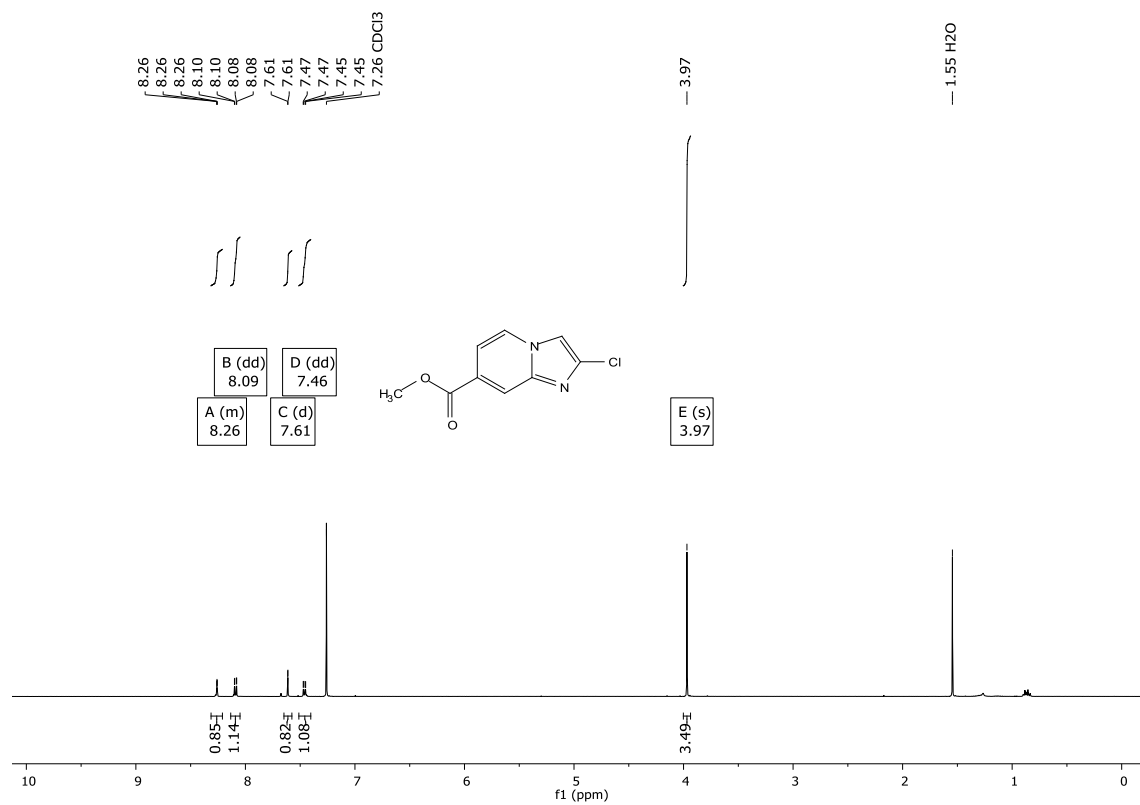



# Methyl 2-iodoimidazo[1,2-a]pyridine-7-carboxylate (12b)

<sup>1</sup>H-NMR

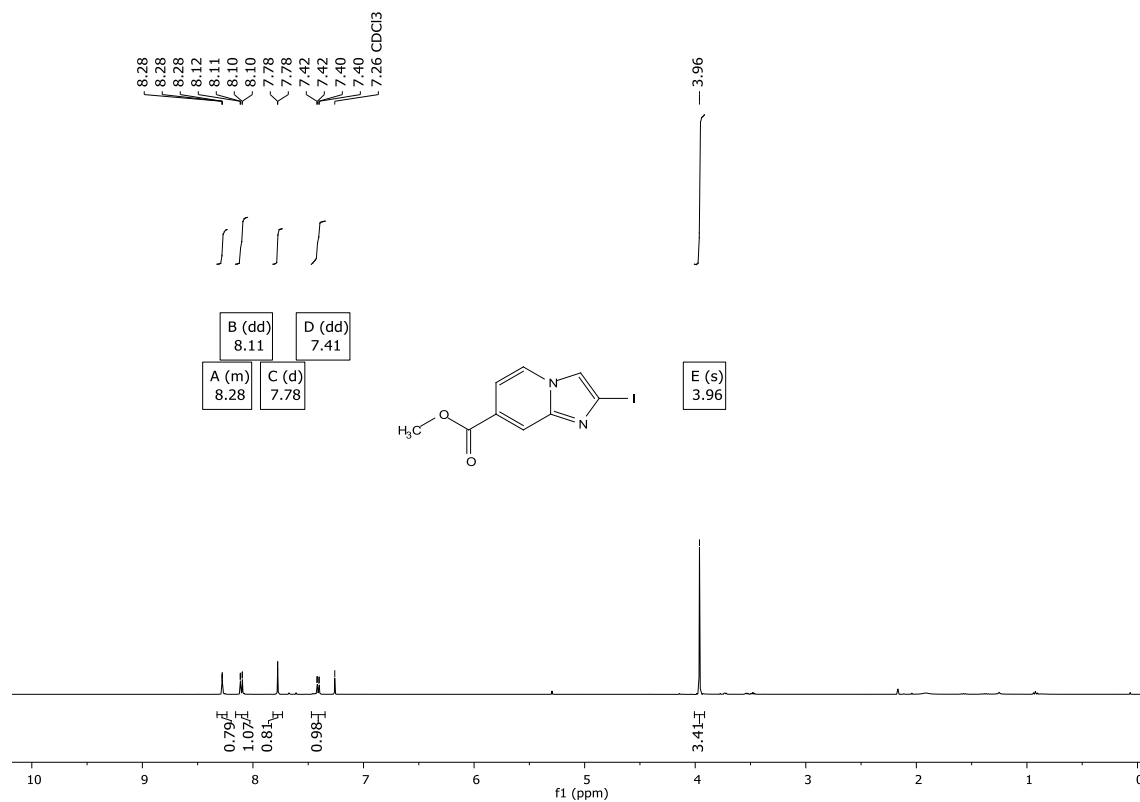

<sup>13</sup>C-NMR

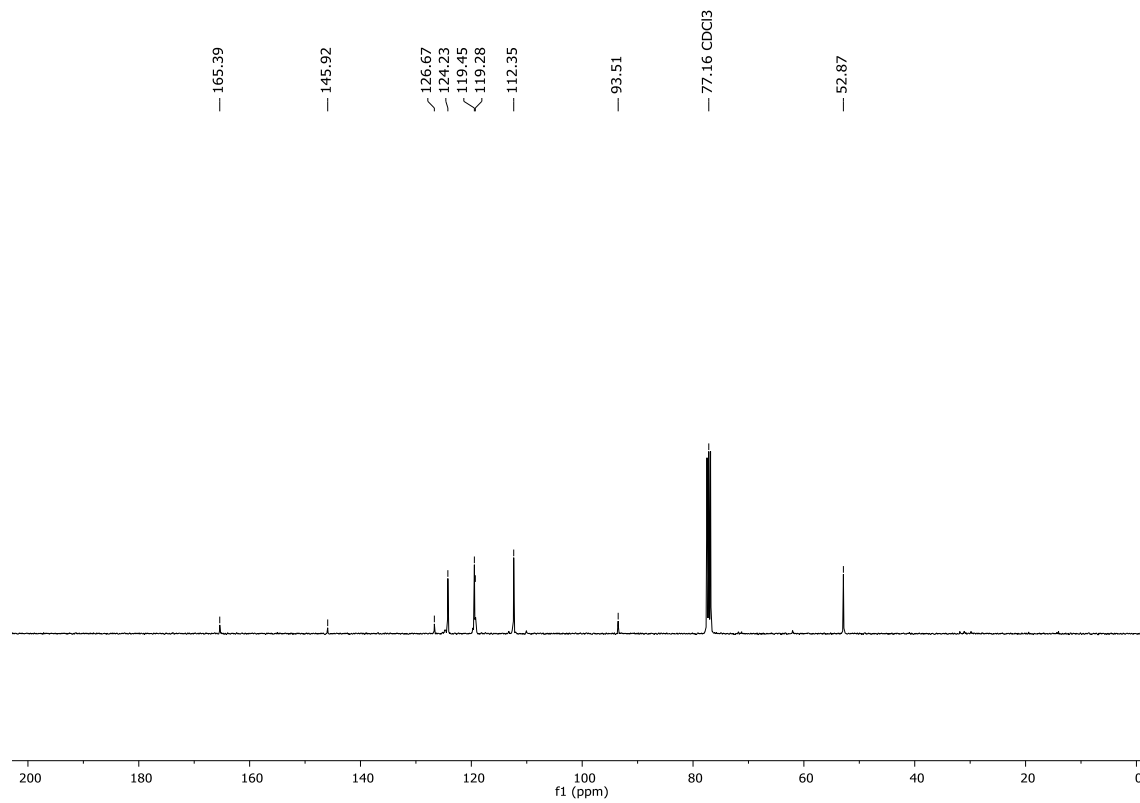

DEPT-135

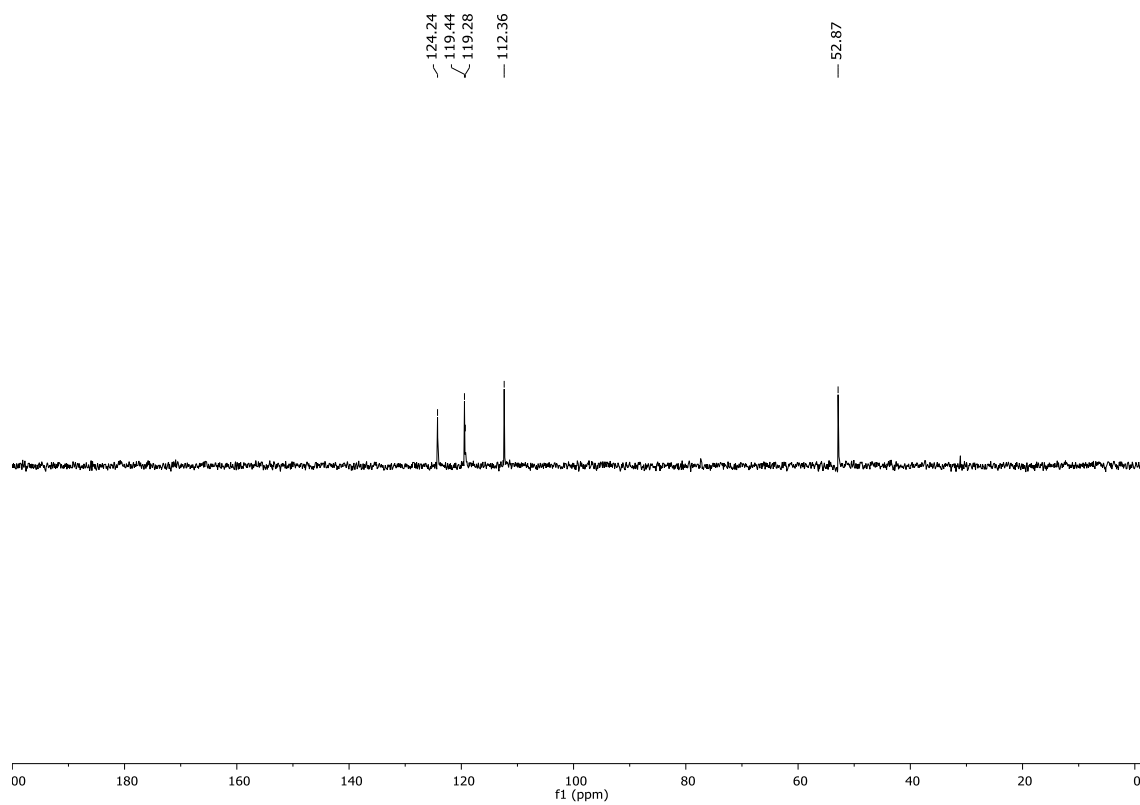

g-COSY

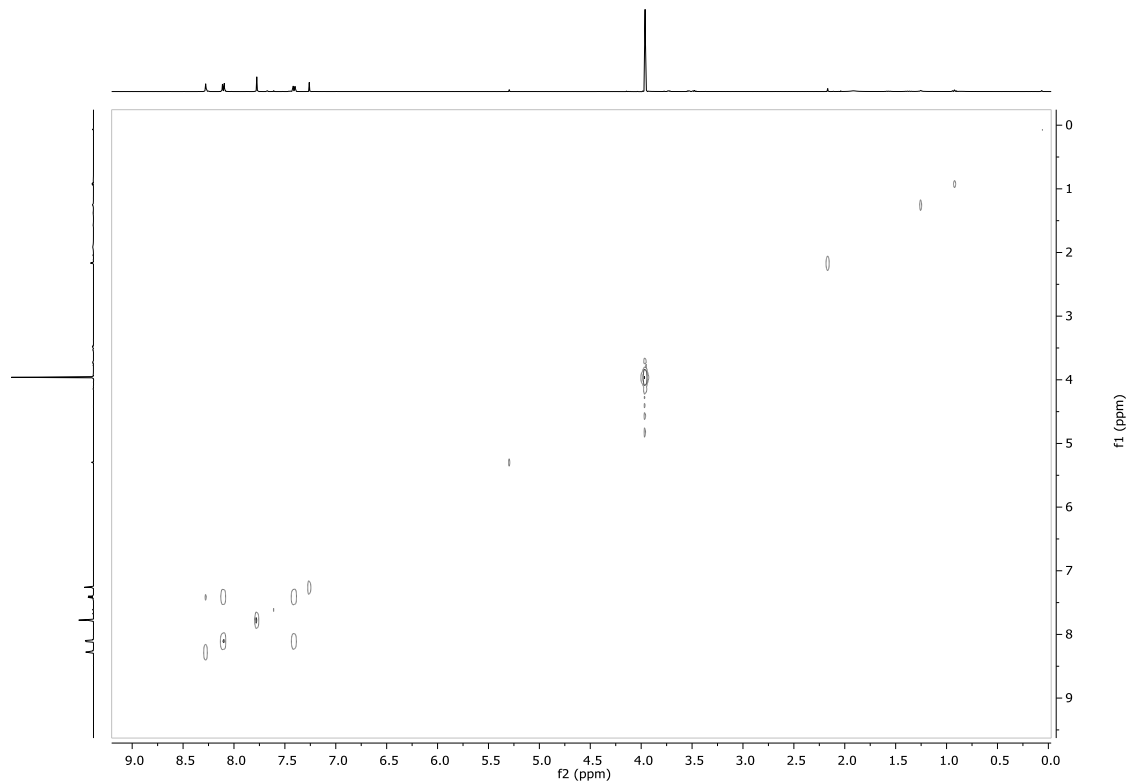

*g*-HSQC

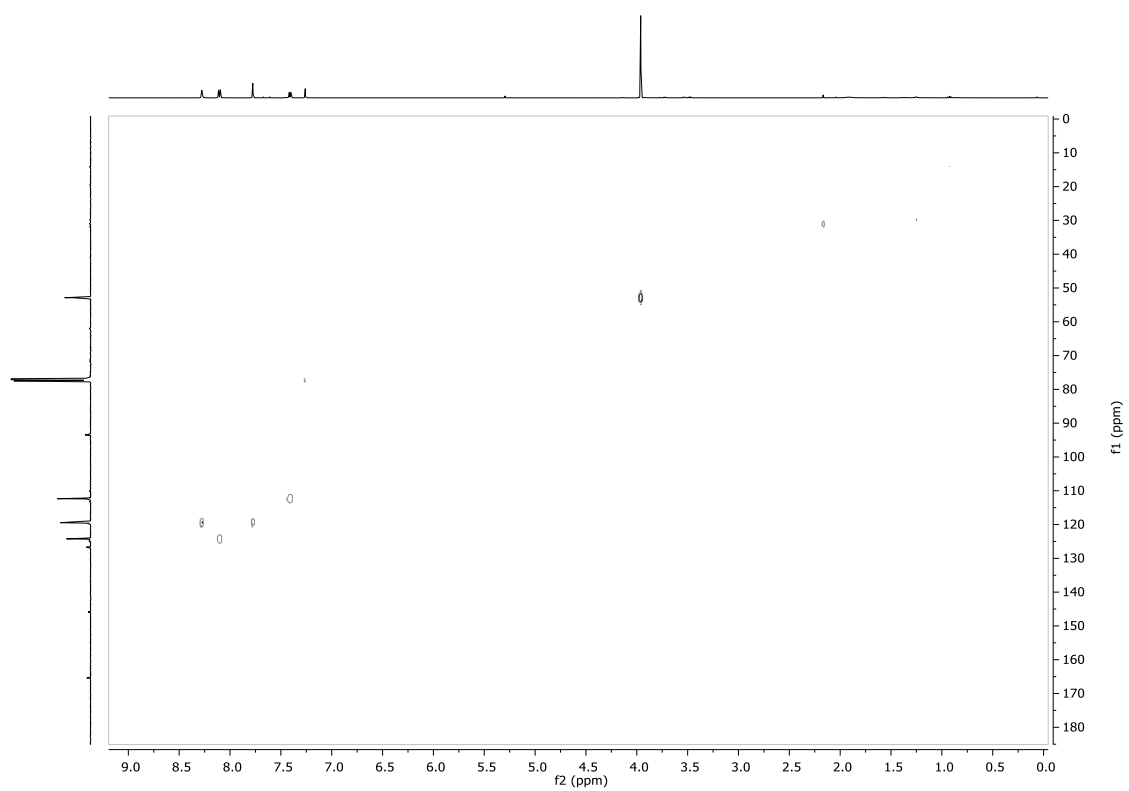

# Methyl 1-iodobenzo[*a*]imidazo[5,1,2-*cd*]indolizine-4-carboxylate (13)

<sup>1</sup>H-NMR

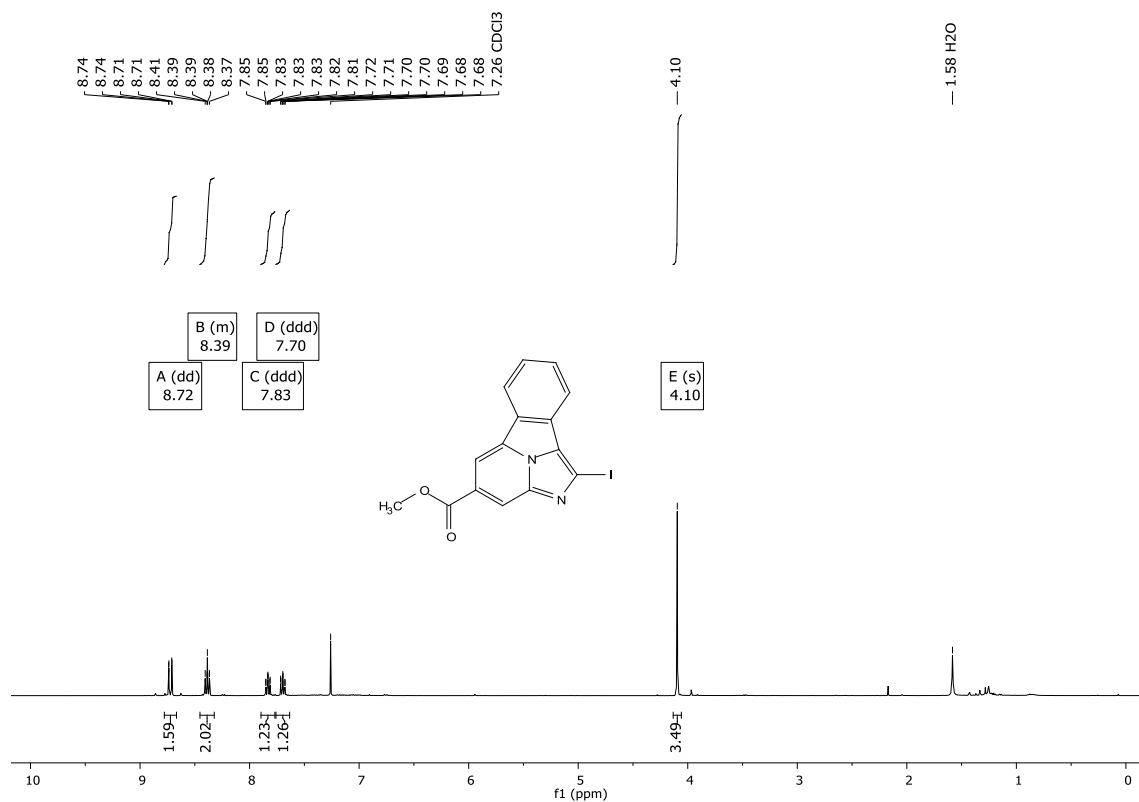

<sup>13</sup>C-NMR

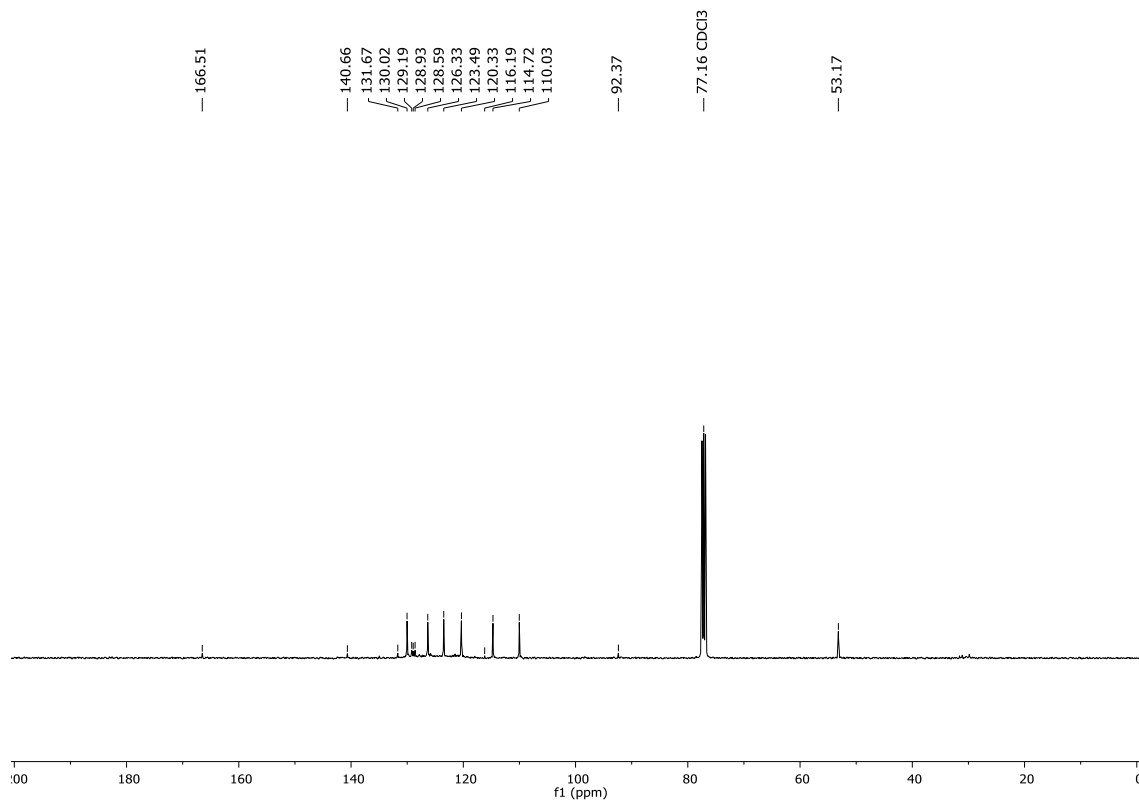

DEPT-135

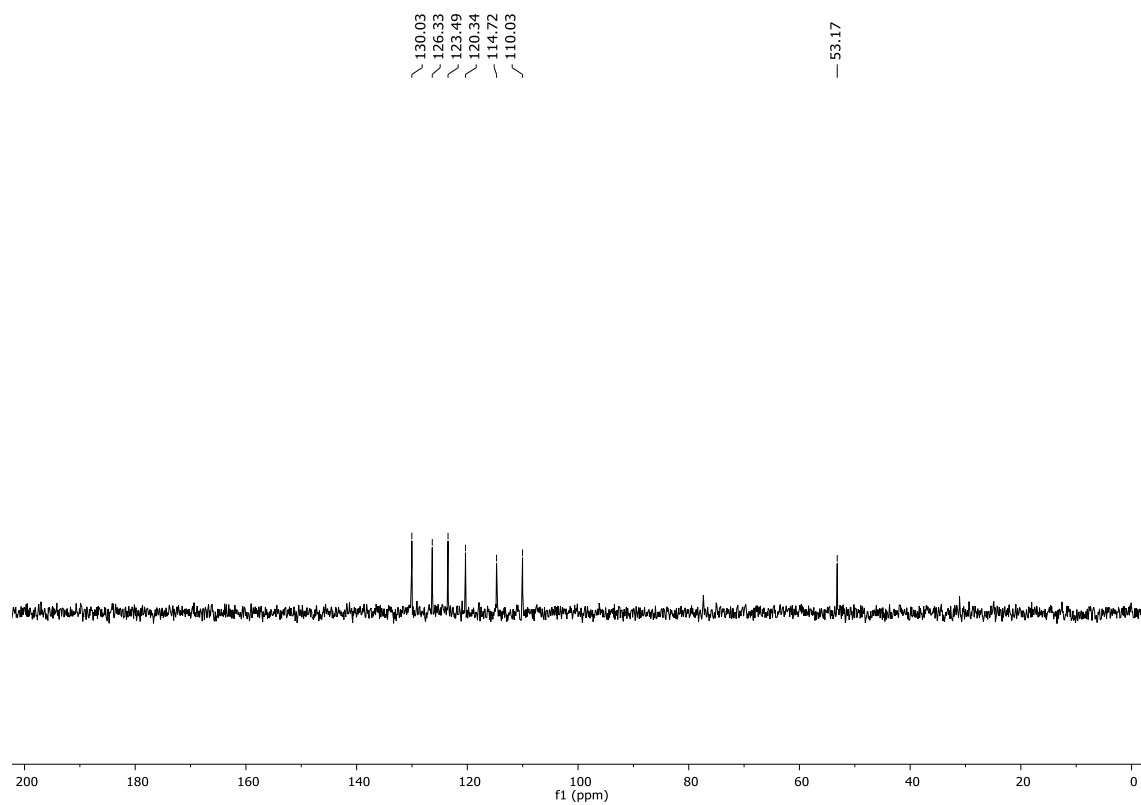

g-COSY

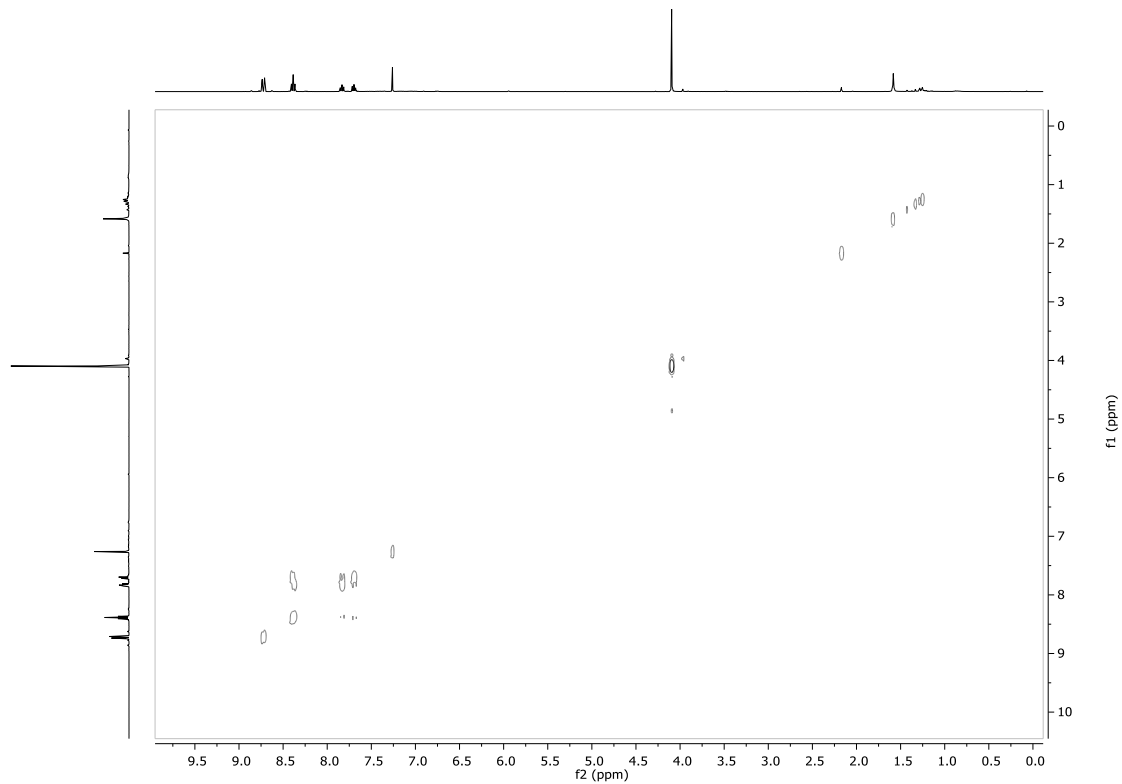

*g*-HSQC

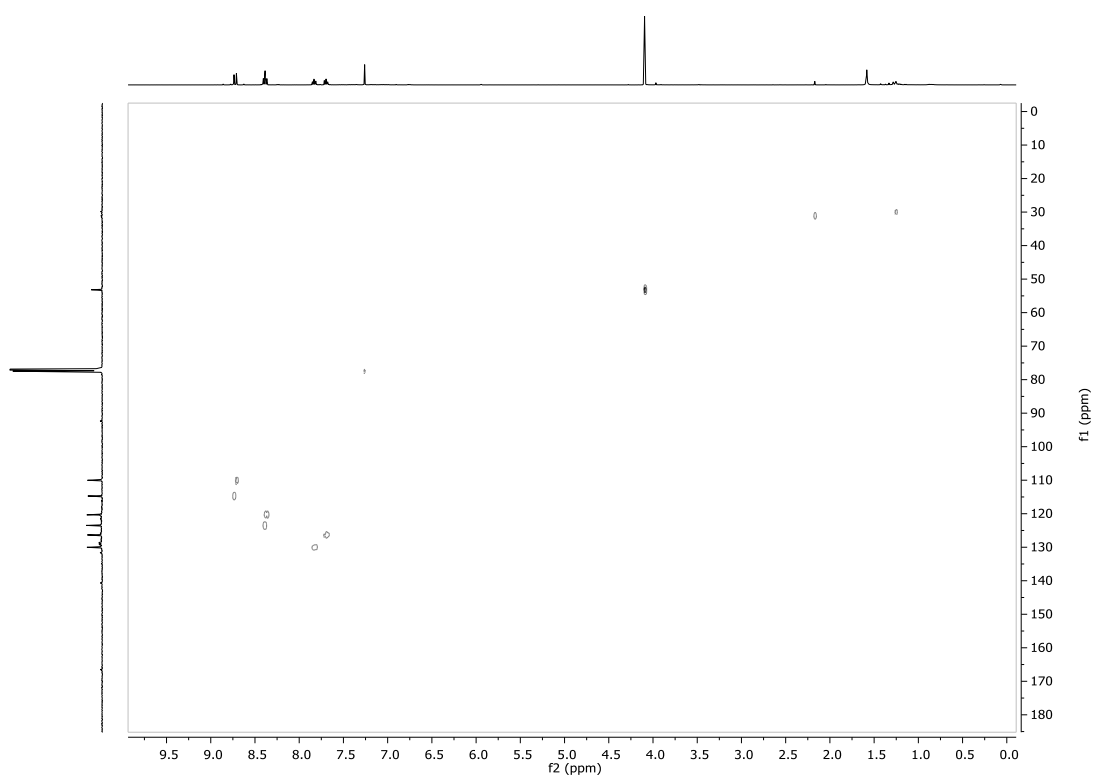

**Methyl 1-(4-(1,4,7,10,13-pentaoxa-16-azacyclooctadecan-16-yl)phenyl)benzo[*a*]imidazo[5,1,2-*cd*]indolizine-4-carboxylate (14a)**

<sup>1</sup>H-NMR

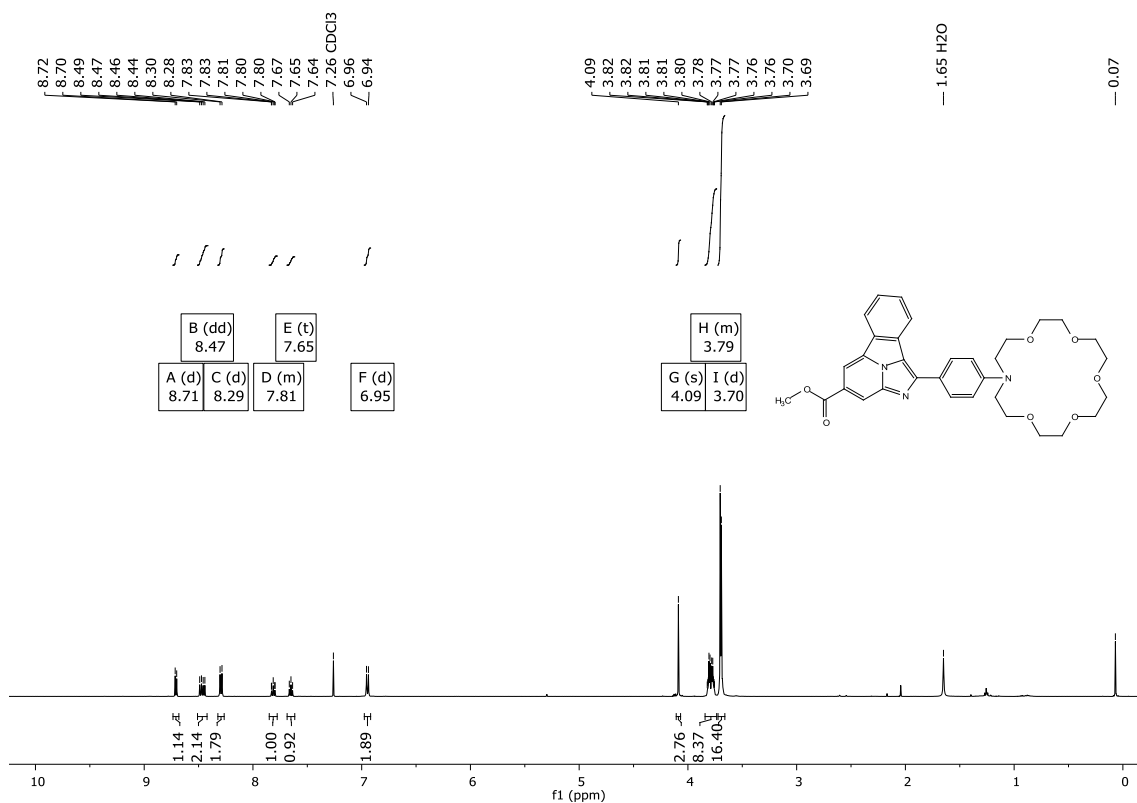

<sup>13</sup>C-NMR

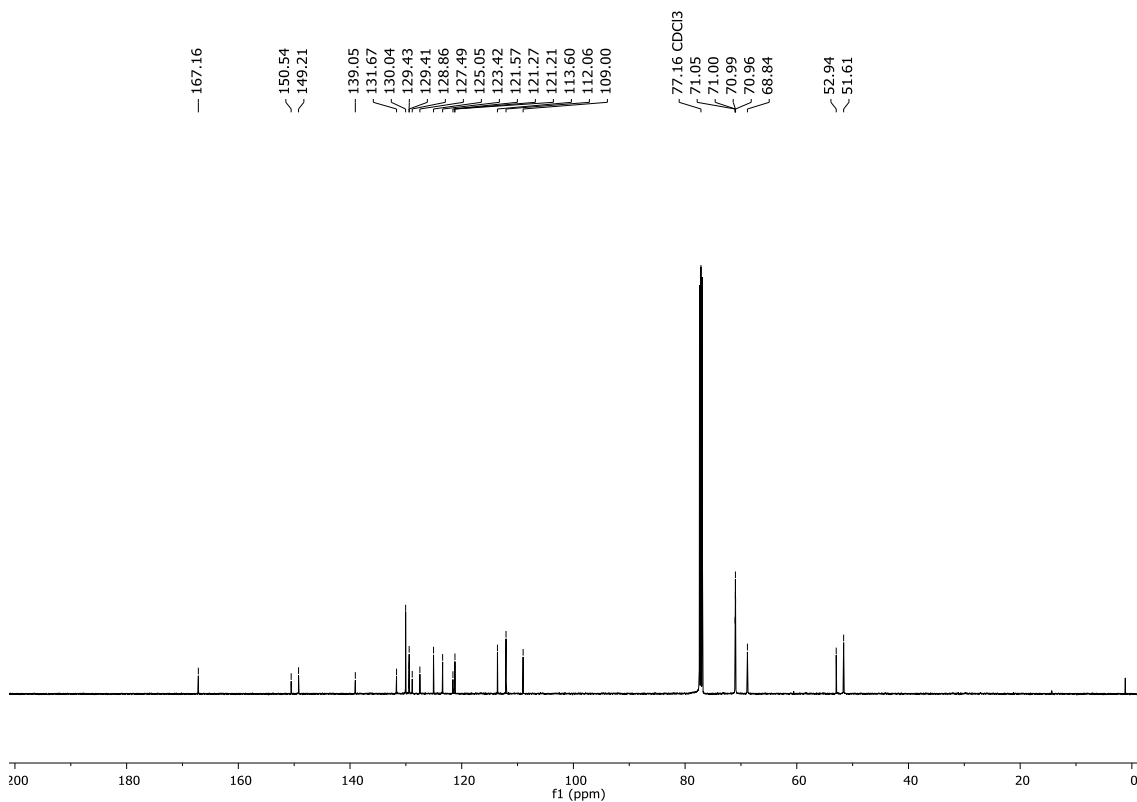

DEPT-135

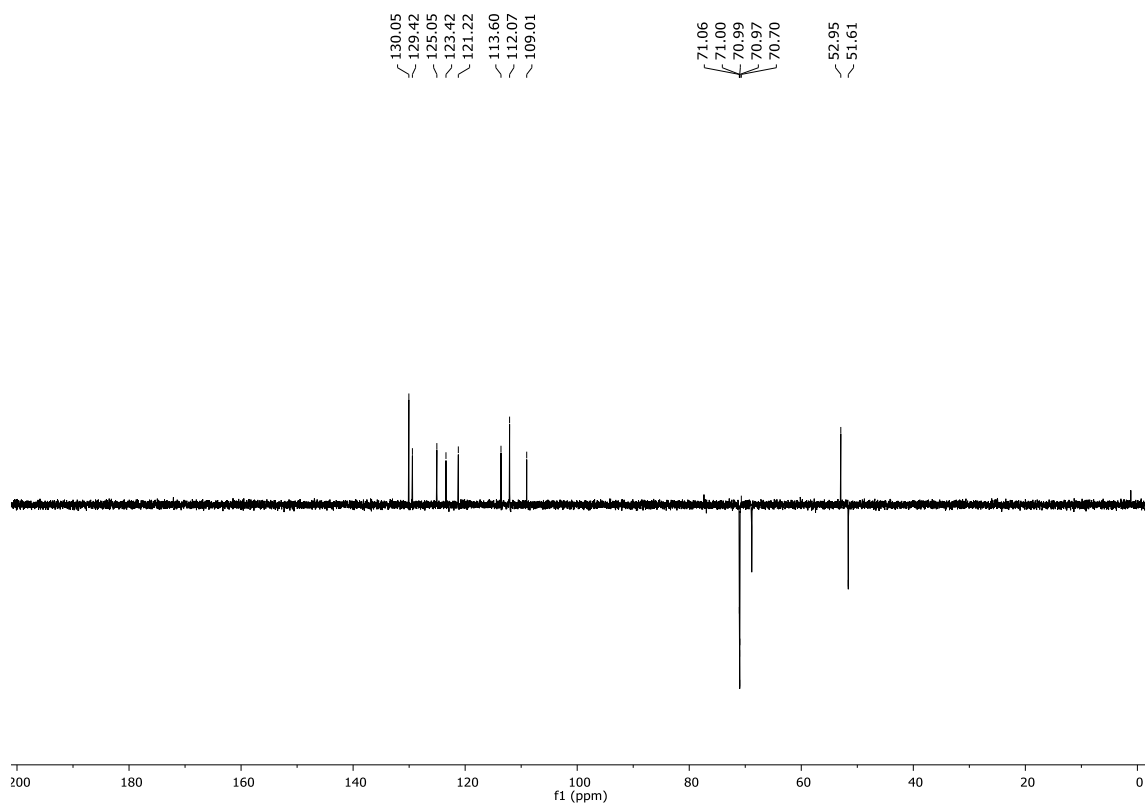

g-COSY

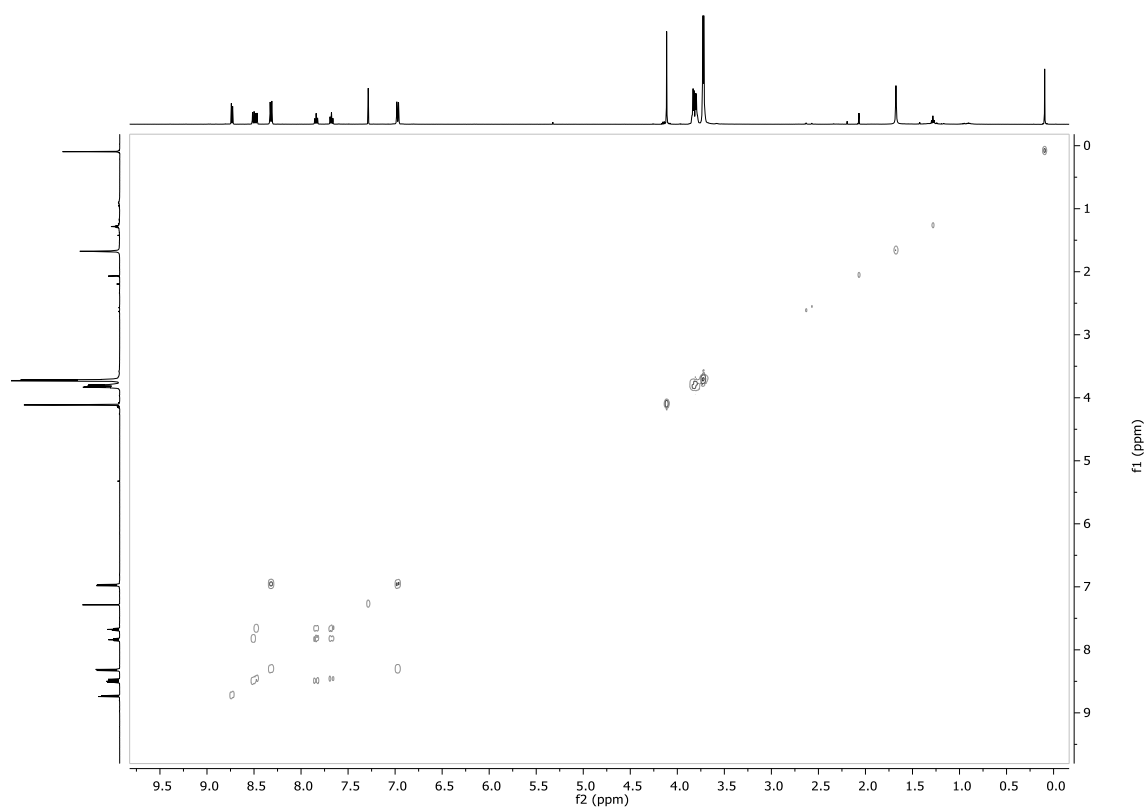



*g*-HSQC

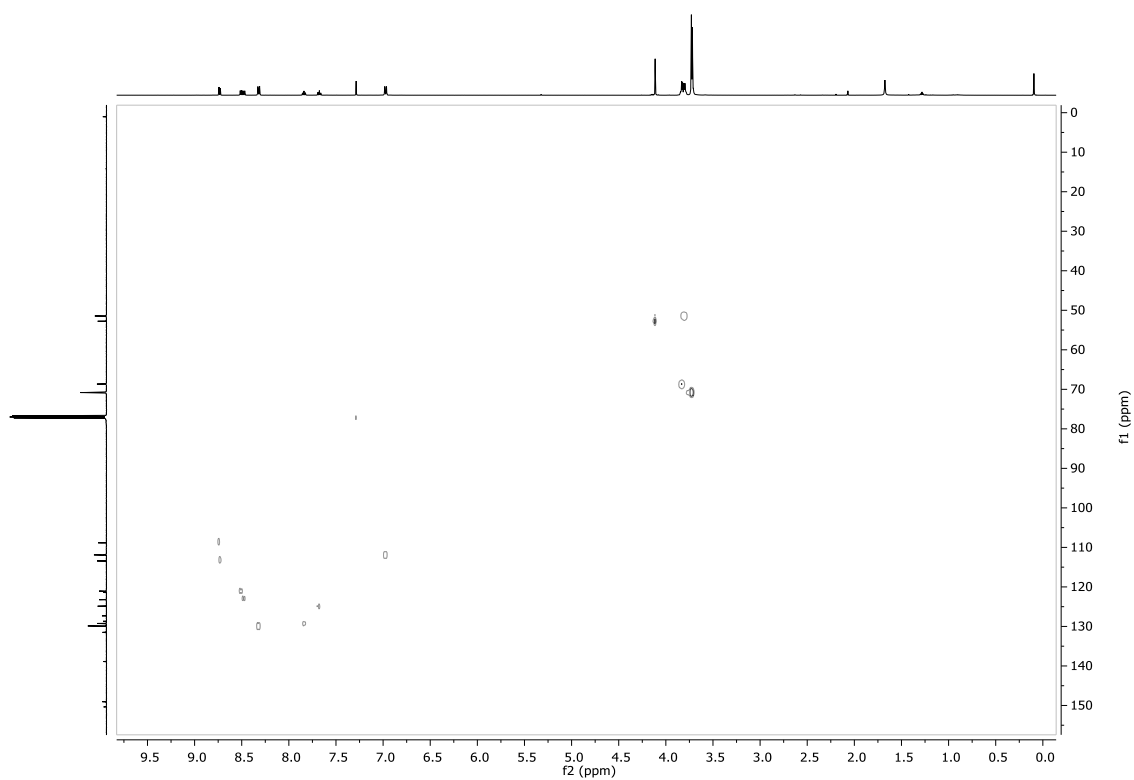

**Methyl 1-(4-(16-benzyl-1,4,10,13-tetraoxa-7,16-diazacyclooctadecan-7-yl)phenyl)benzo[*a*]imidazo[5,1,2-*cd*]indolizine-4-carboxylate (14b)**

<sup>1</sup>H-NMR

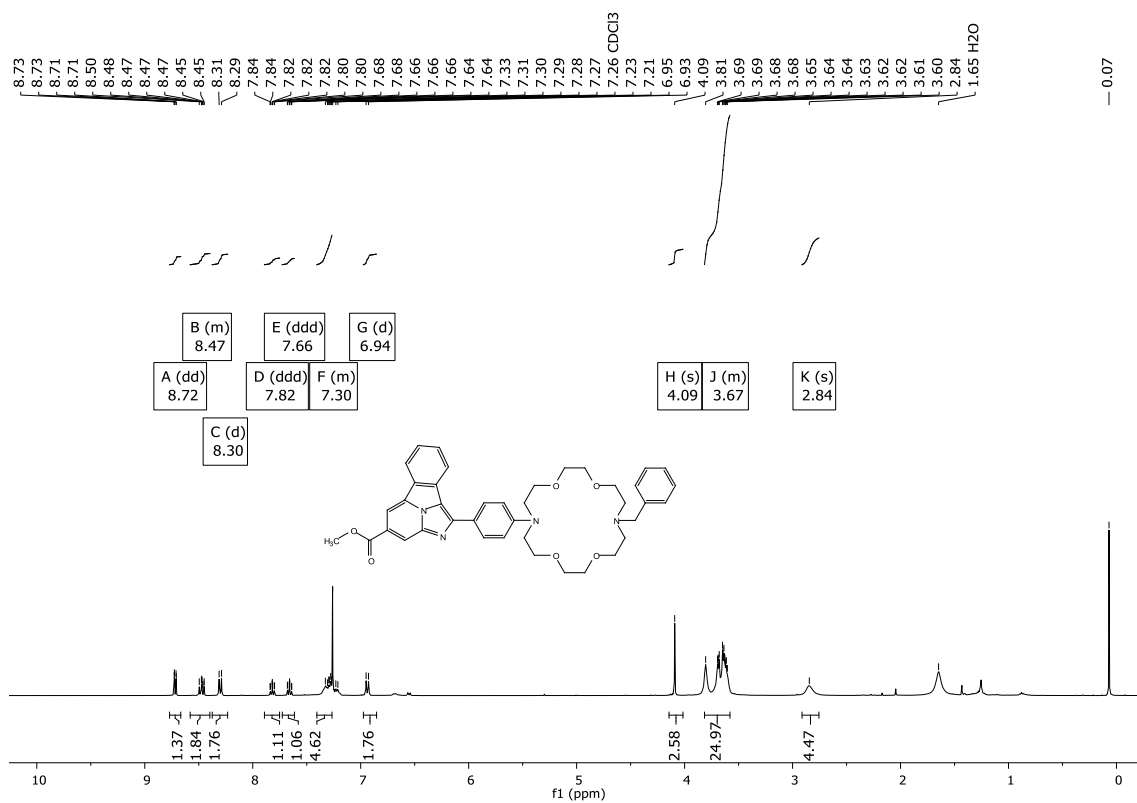

<sup>13</sup>C-NMR

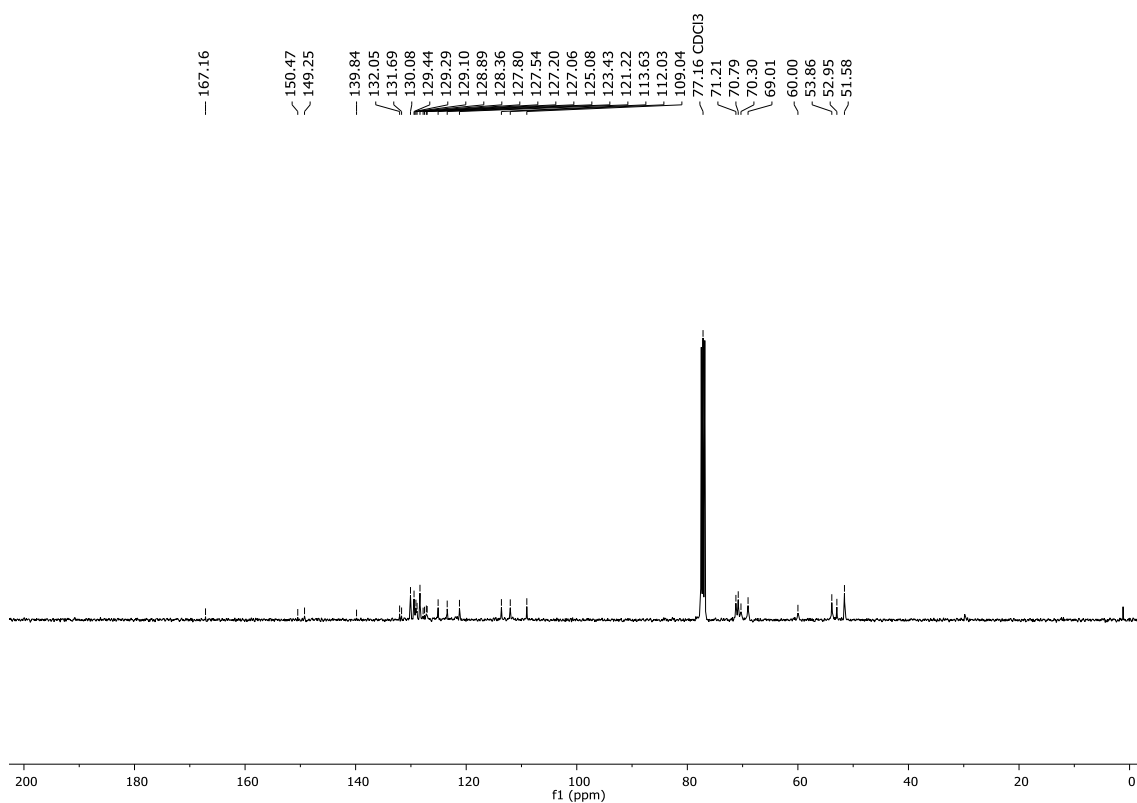

DEPT-135

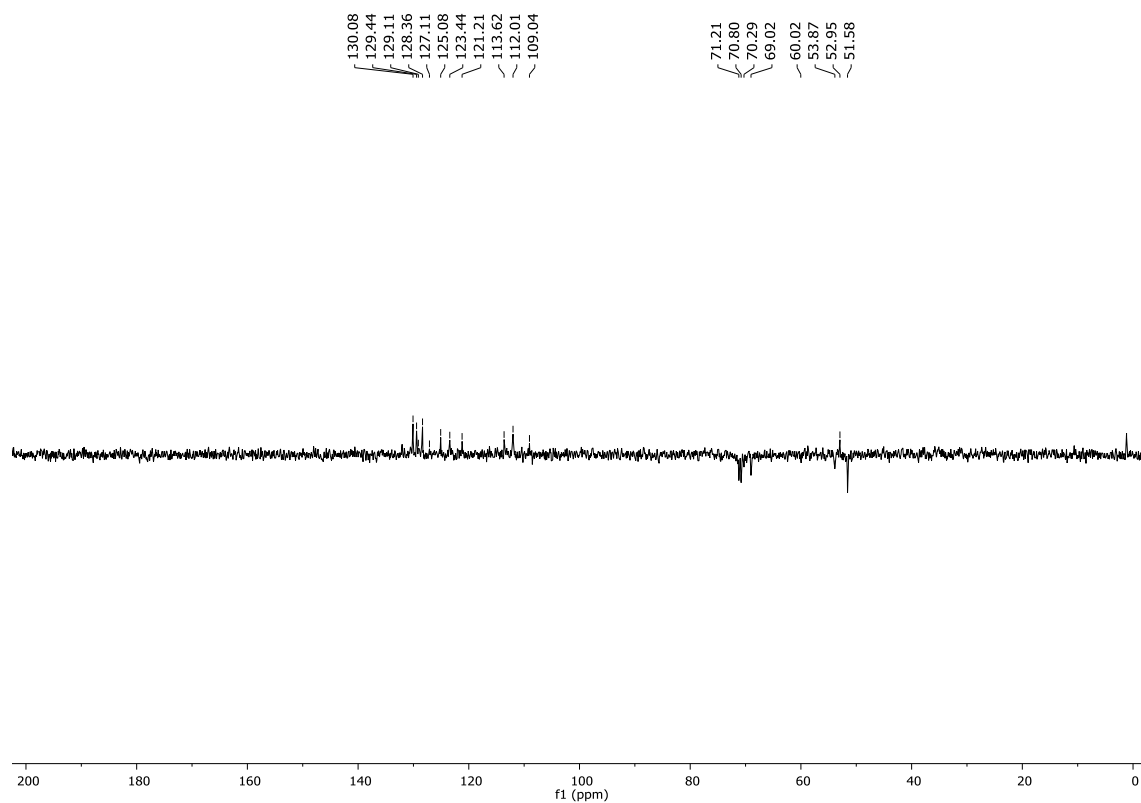

g-COSY

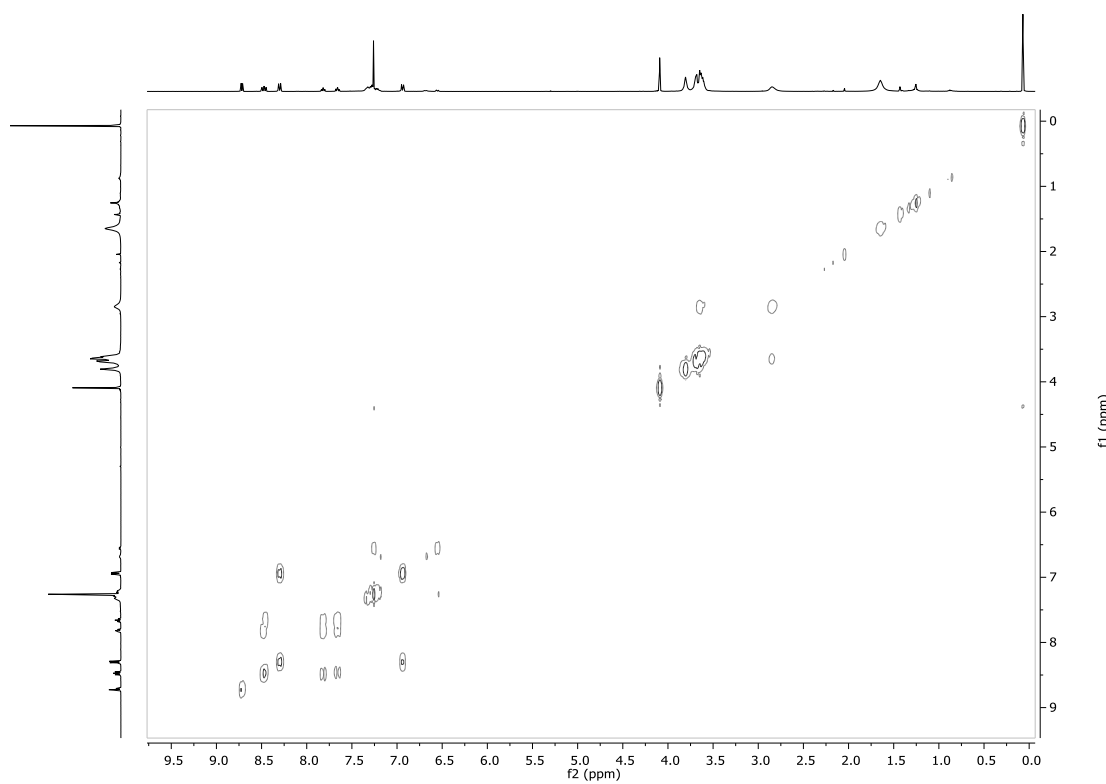

*g*-HSQC

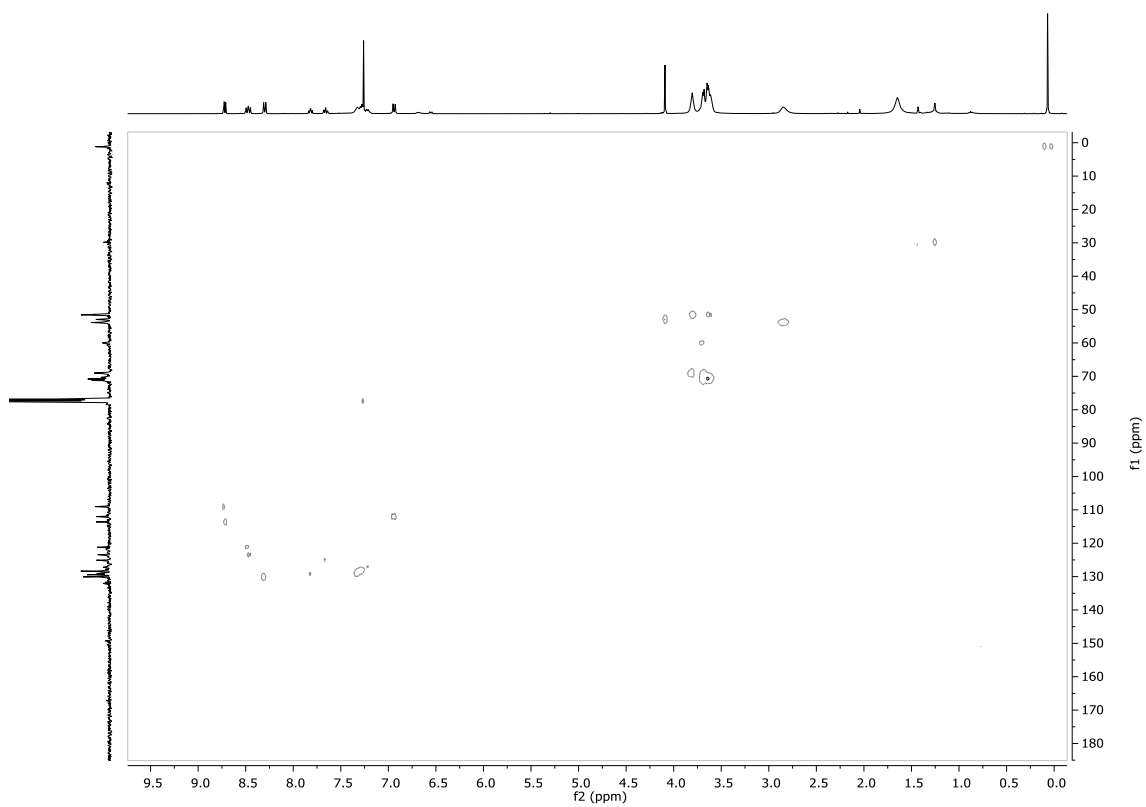

**1-(4-(1,4,7,10,13-Pentaoxa-16-azacyclooctadecan-16-yl)phenyl)-N-(3-(2,8,9-trioxa-5-aza-1-silabicyclo[3.3.3]undecan-1-yl)propyl)benzo[*a*]imidazo[5,1-*cd*]indolizine-4-carboxamide (15aa)**

<sup>1</sup>H-NMR

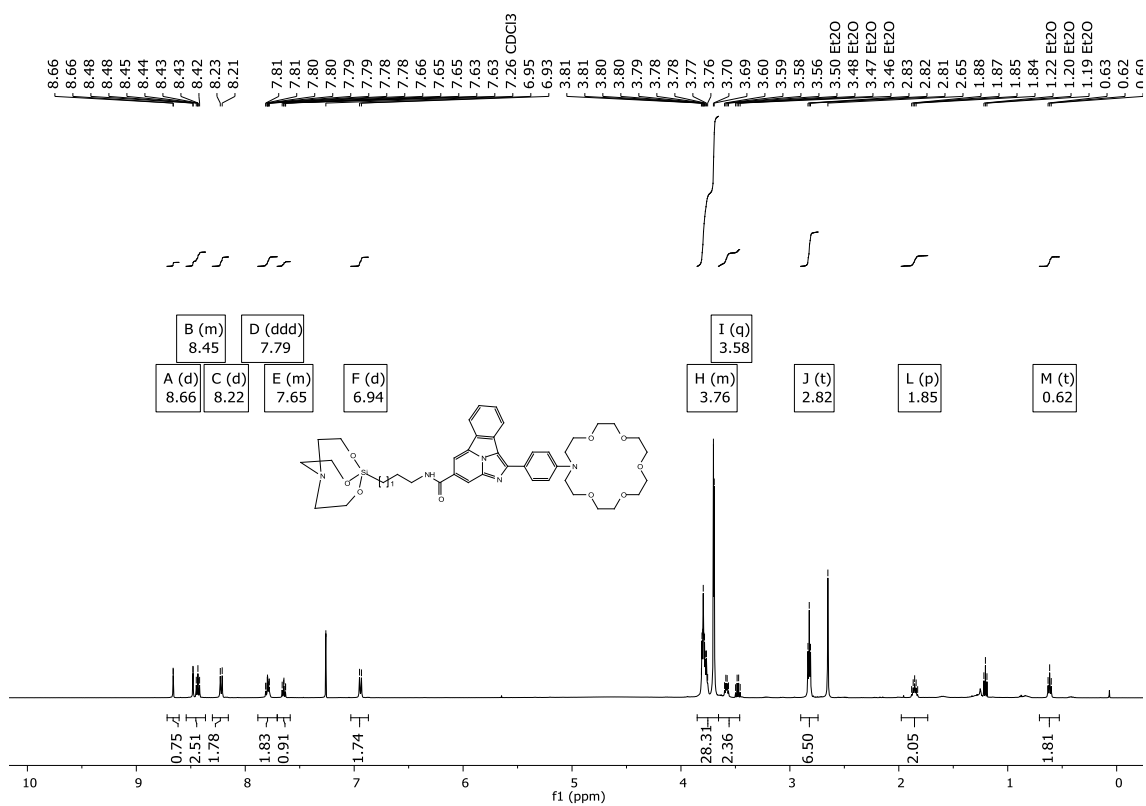

<sup>13</sup>C-NMR

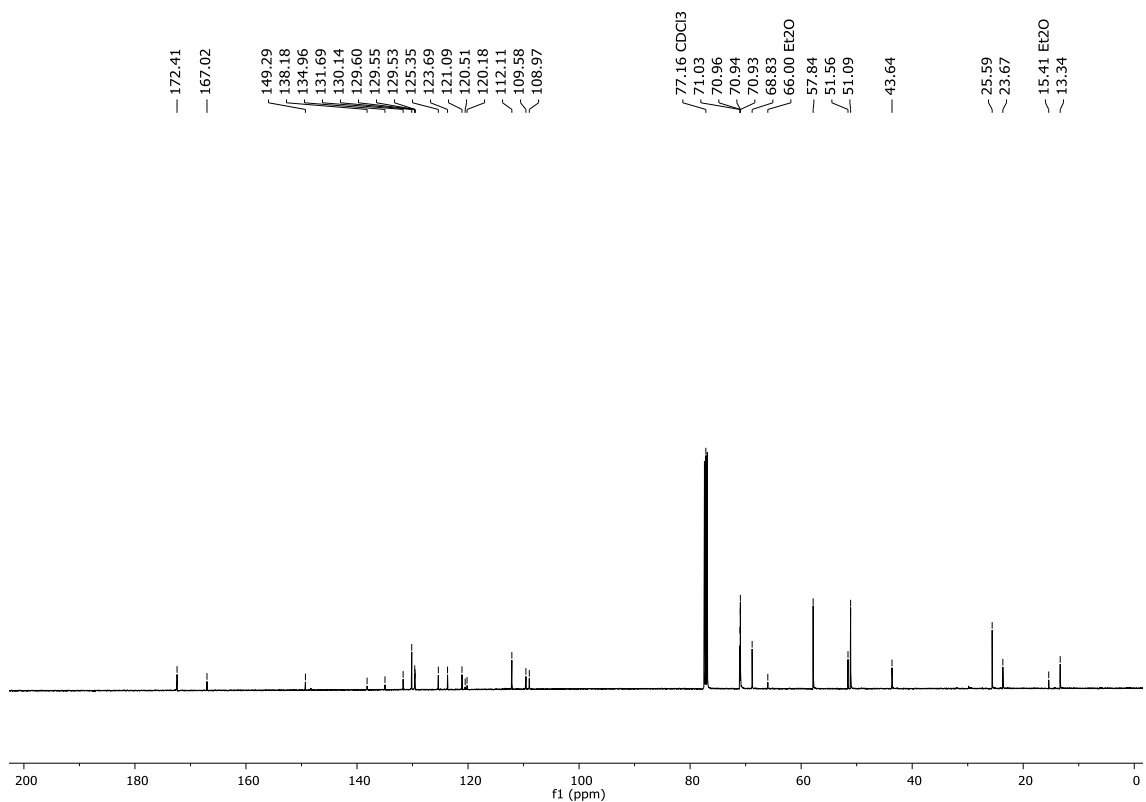

DEPT-135

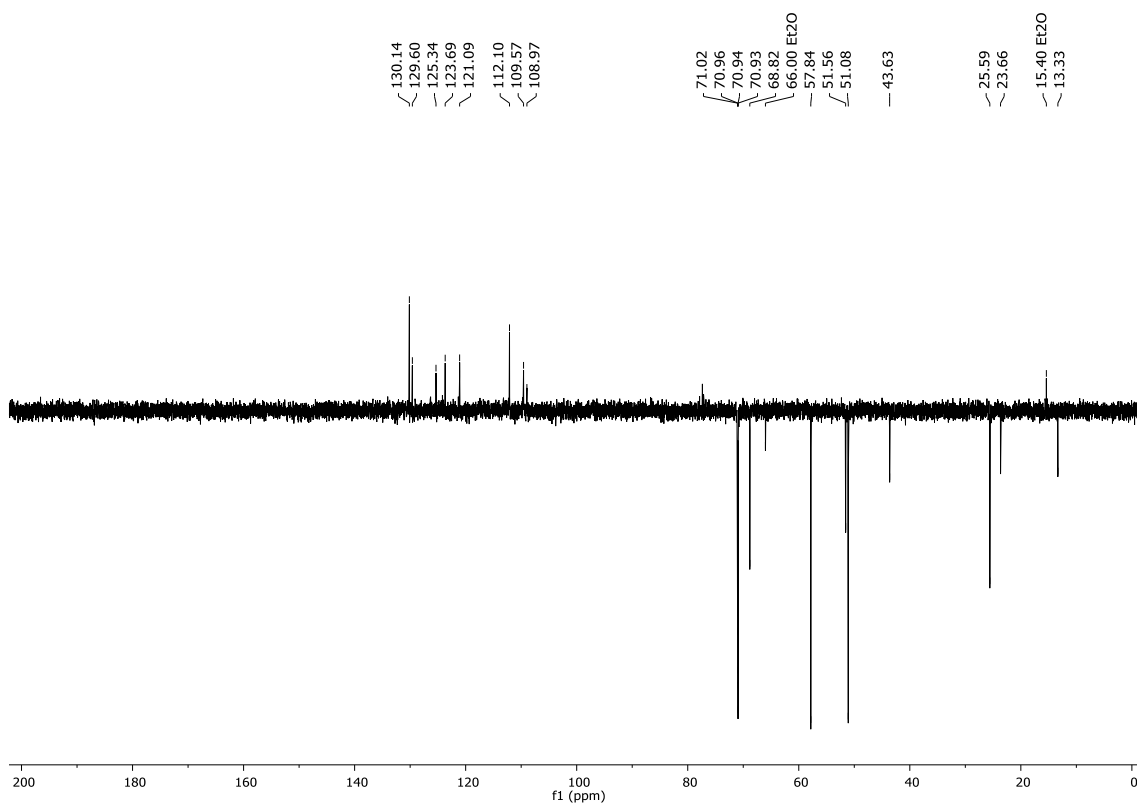

g-COSY

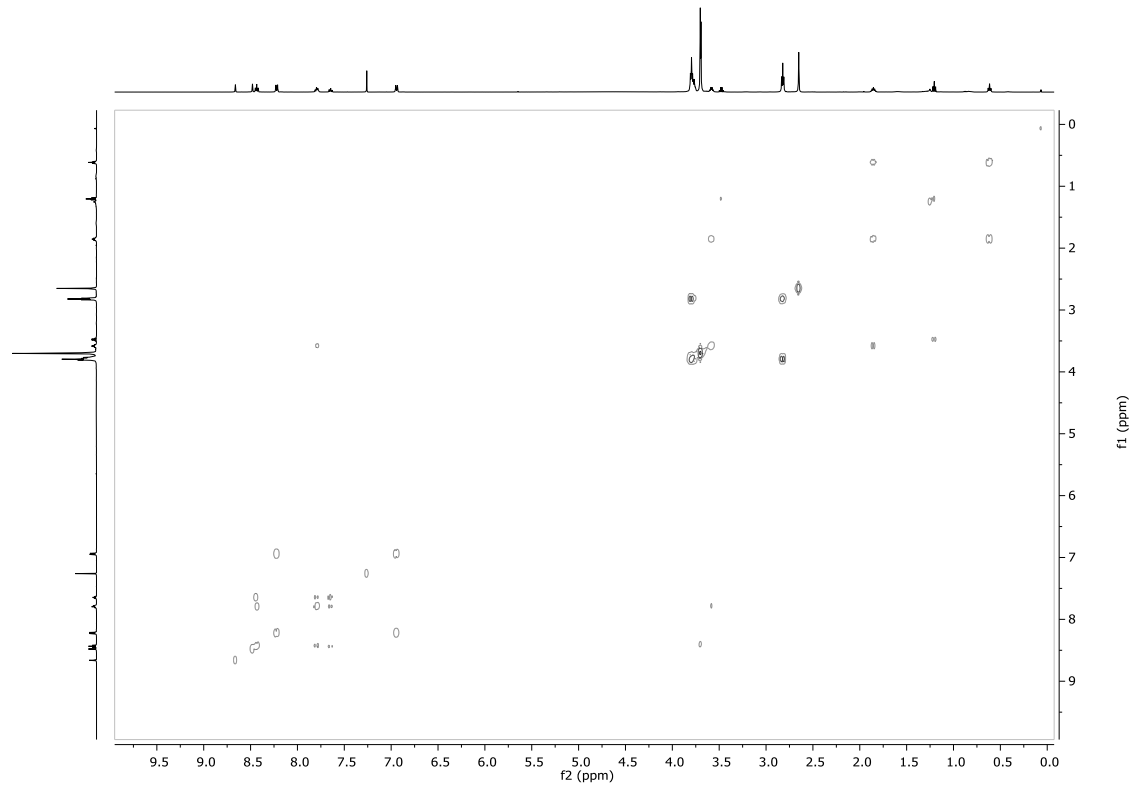

*g*-HSQC

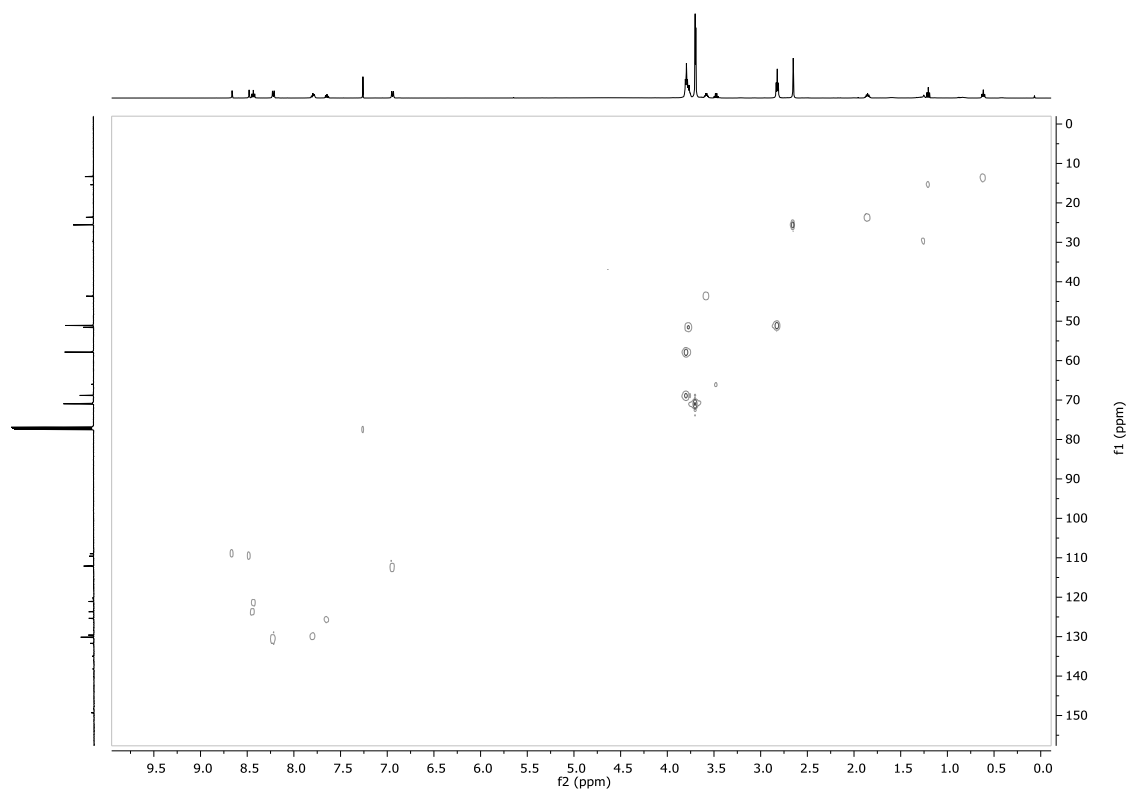

*g*-HMBC

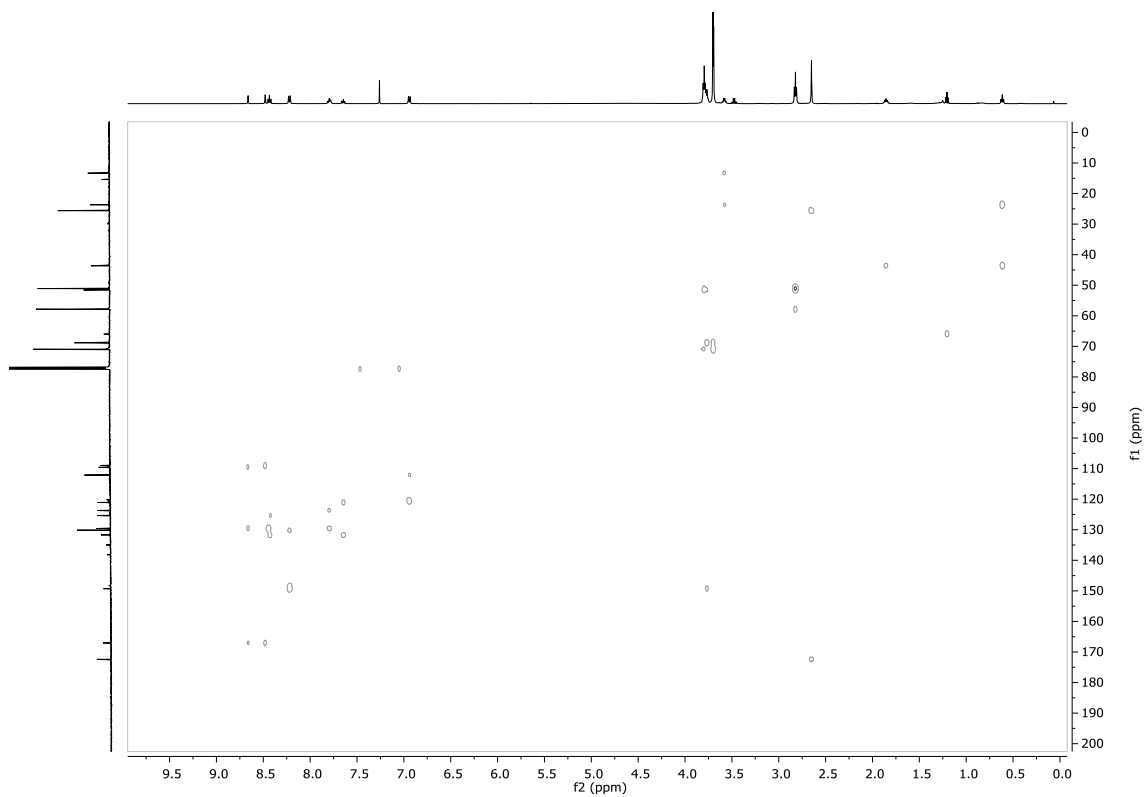

**1-(4-(1,4,7,10,13-Pentaoxa-16-azacyclooctadecan-16-yl)phenyl)-N-(11-(2,8,9-trioxa-5-aza-1-silabicyclo[3.3.3]undecan-1-yl)undecyl)benzo[*a*]imidazo[5,1,2-*cd*]indolizine-4-carboxamide (15ab)**

<sup>1</sup>H-NMR

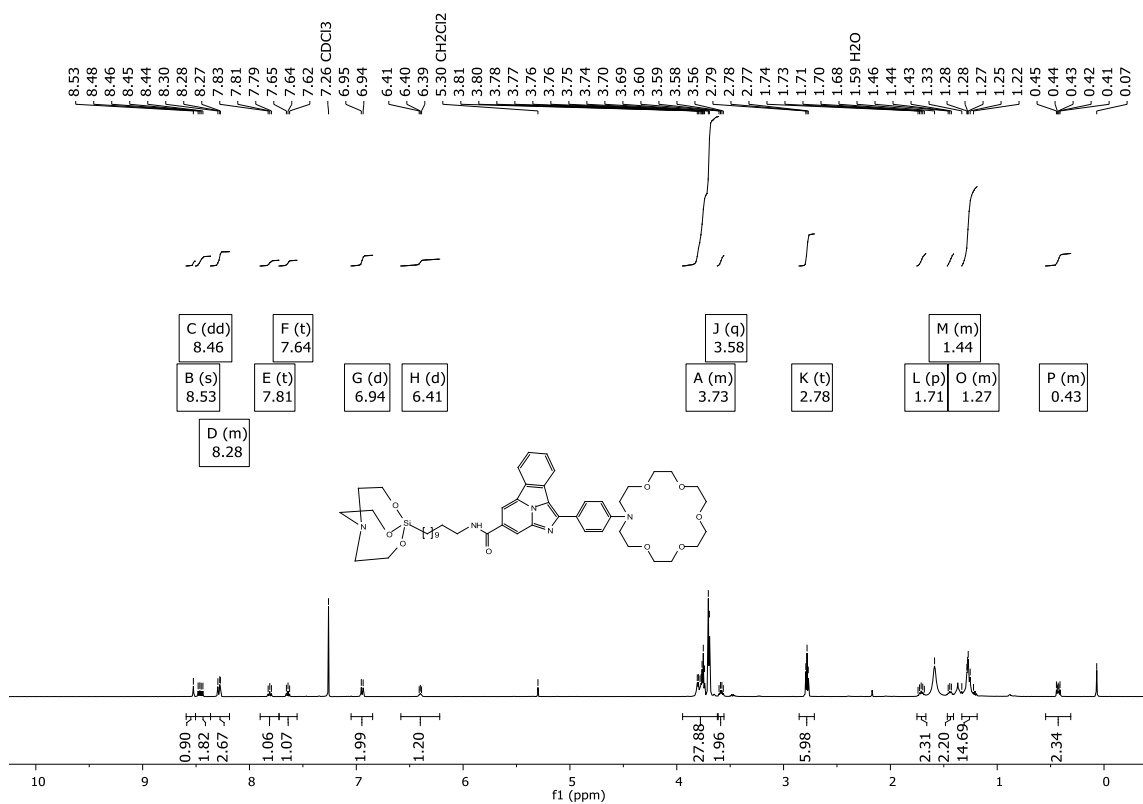

<sup>13</sup>C-NMR

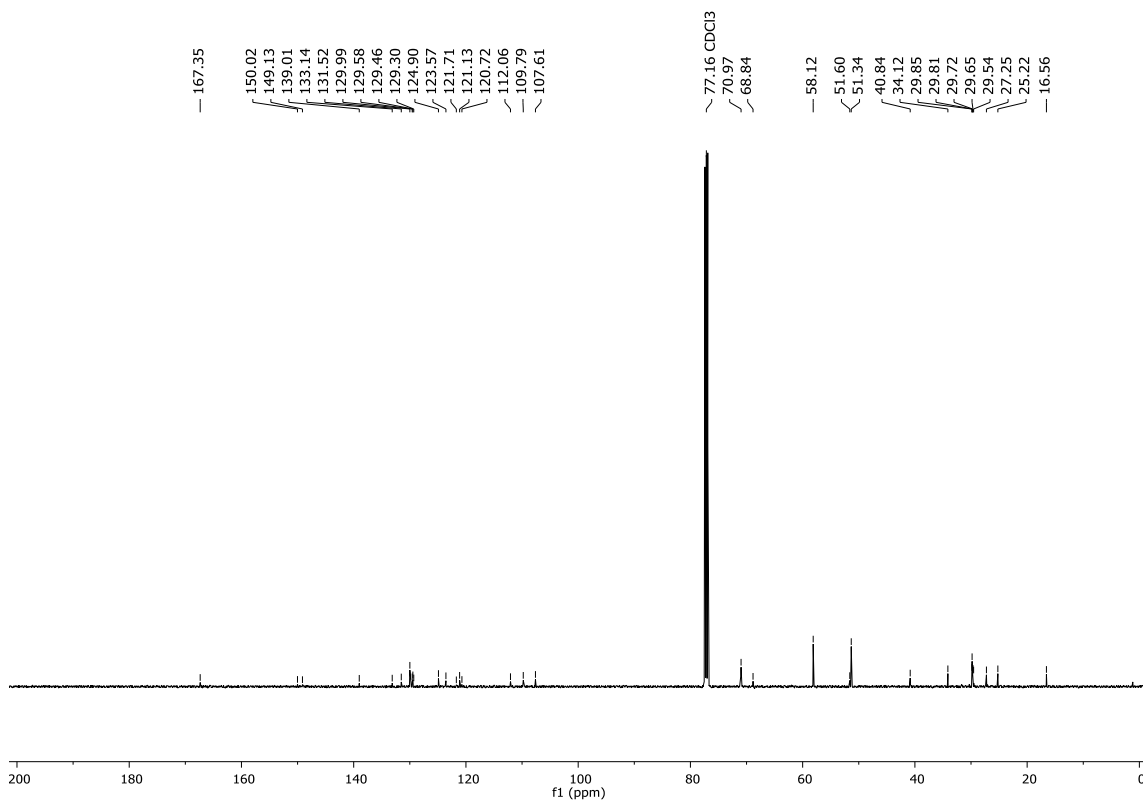



DEPT-135

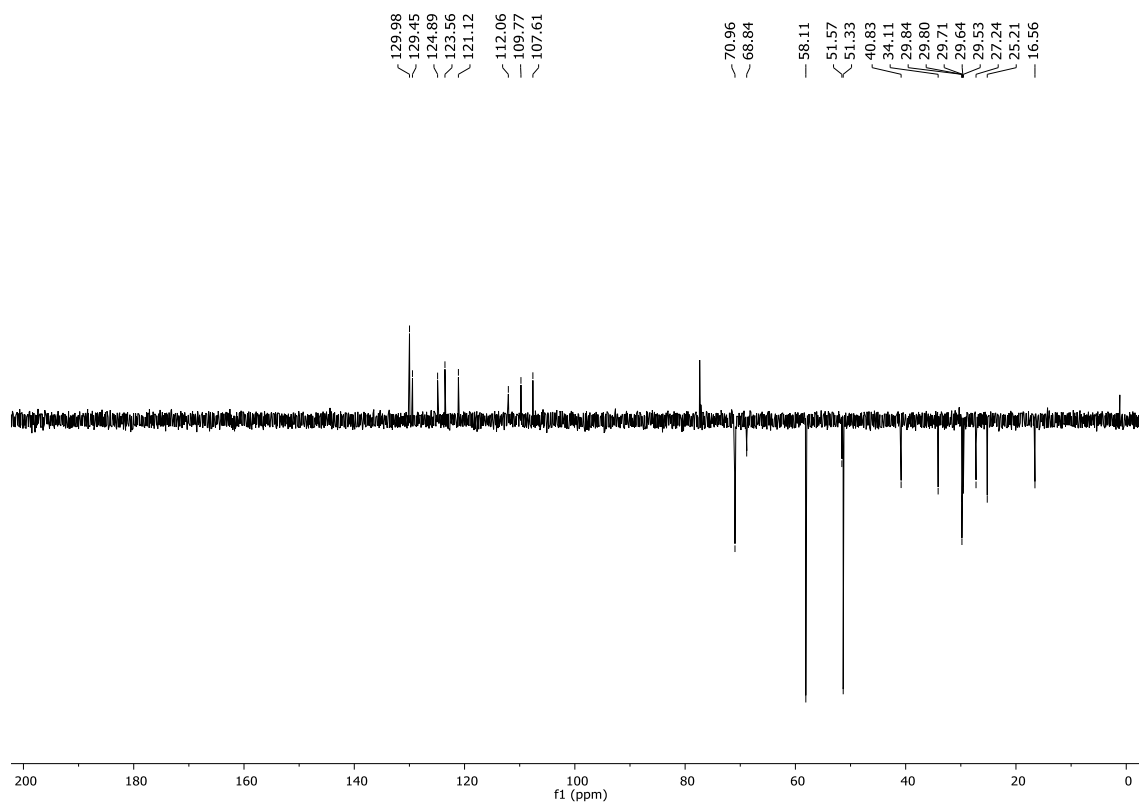

g-COSY

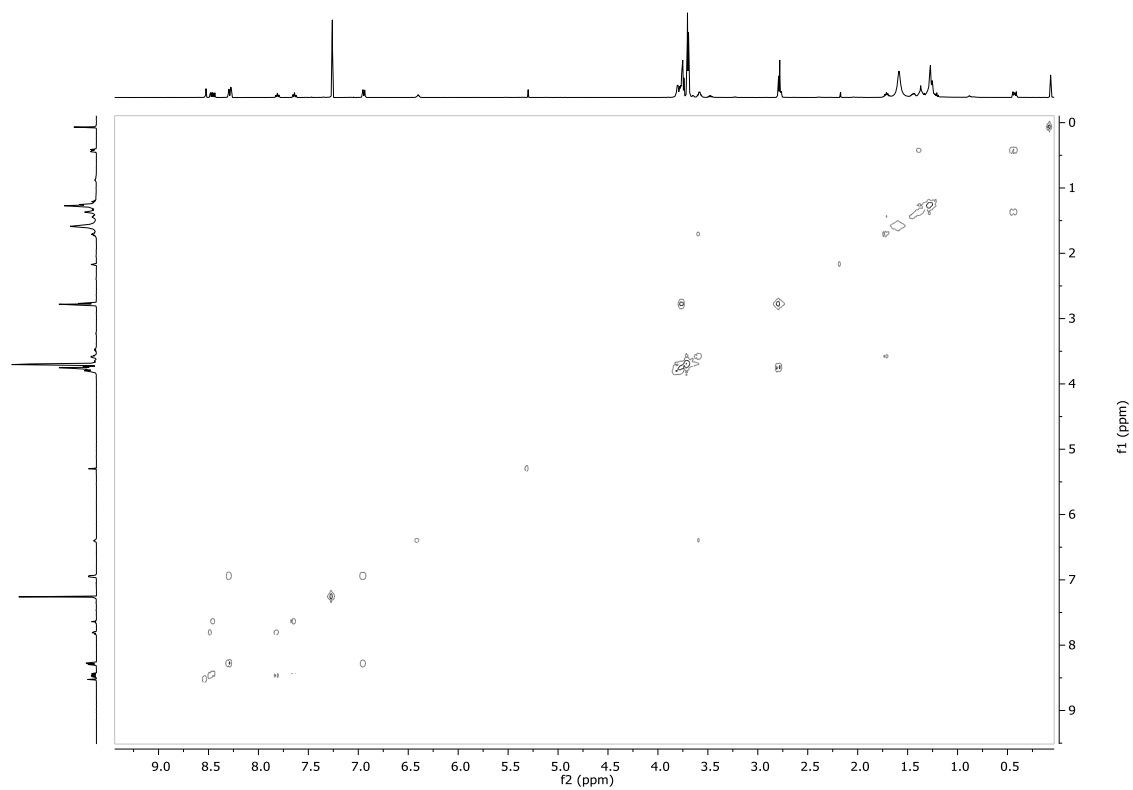

*g*-HSQC

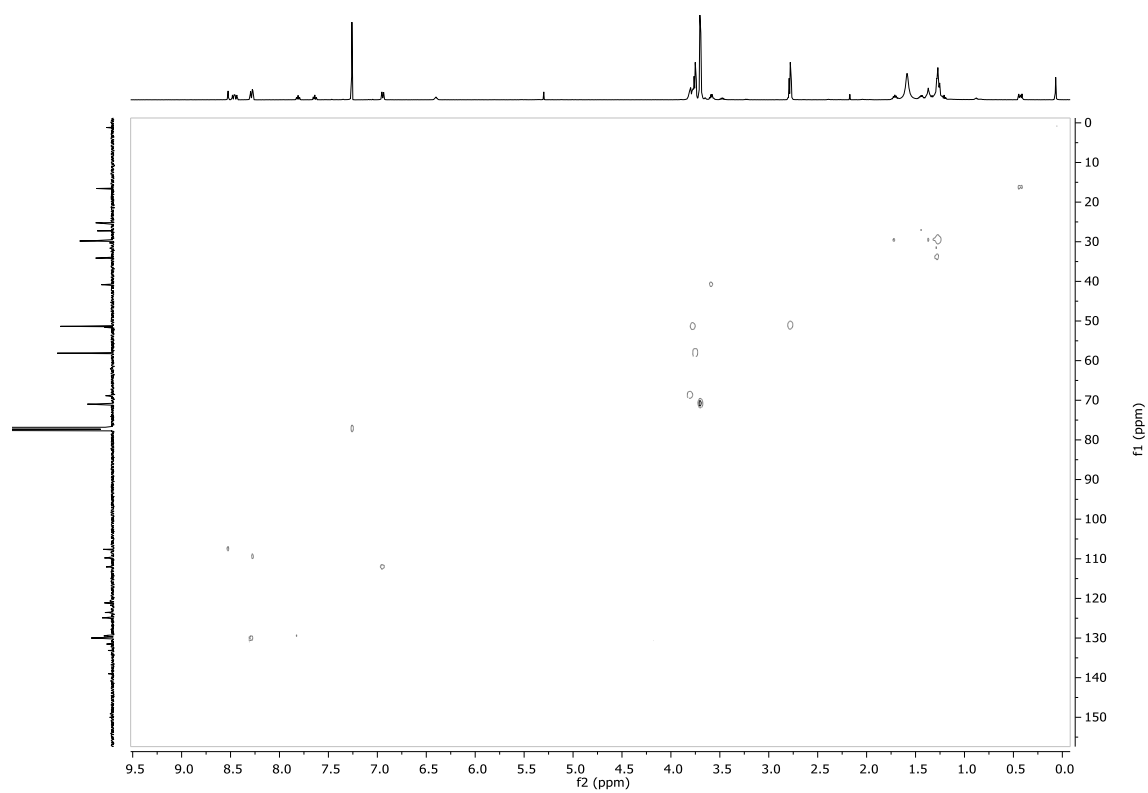

*g*-HMBC

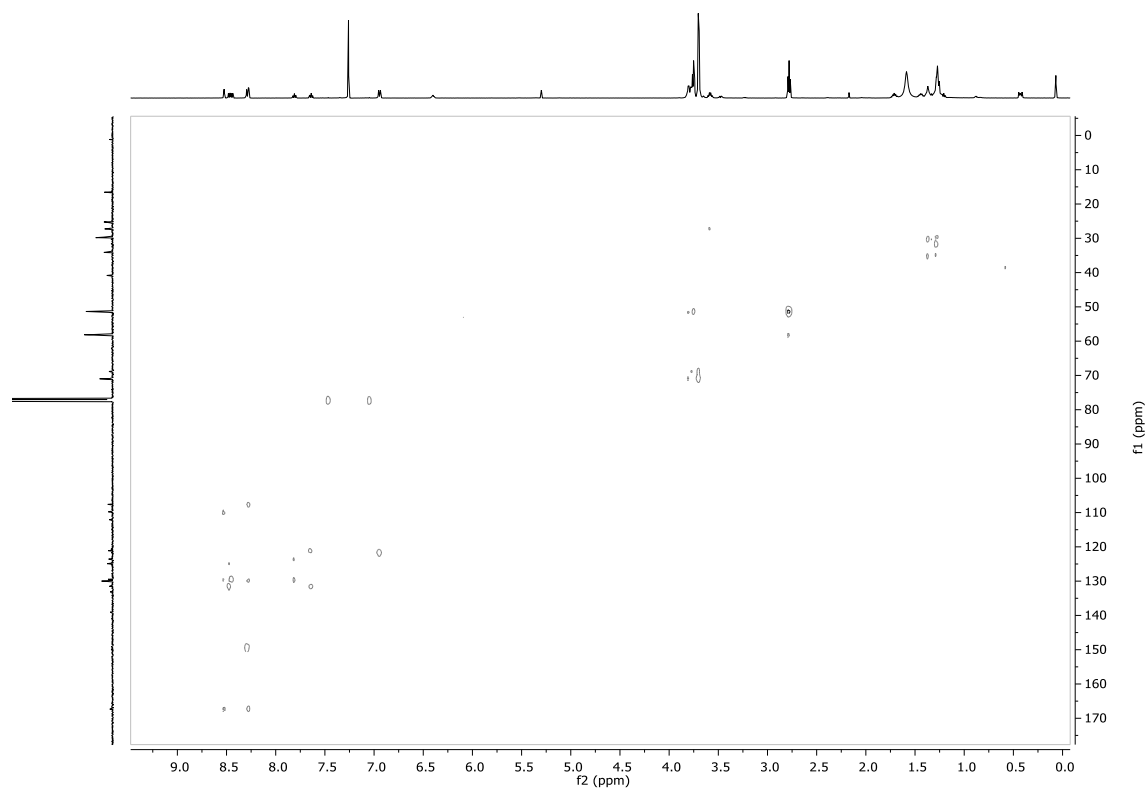

***N*-((3-(2,8,9-trioxa-5-aza-1-silabicyclo[3.3.3]undecan-1-yl)propyl)-1-(4-(16-benzyl-1,4,10,13-tetraoxa-7,16-diazacyclooctadecan-7-yl)phenyl)benzo[*a*]imidazo[5,1-*cd*]indolizine-4-carboxamide (15ba)**

<sup>1</sup>H-NMR

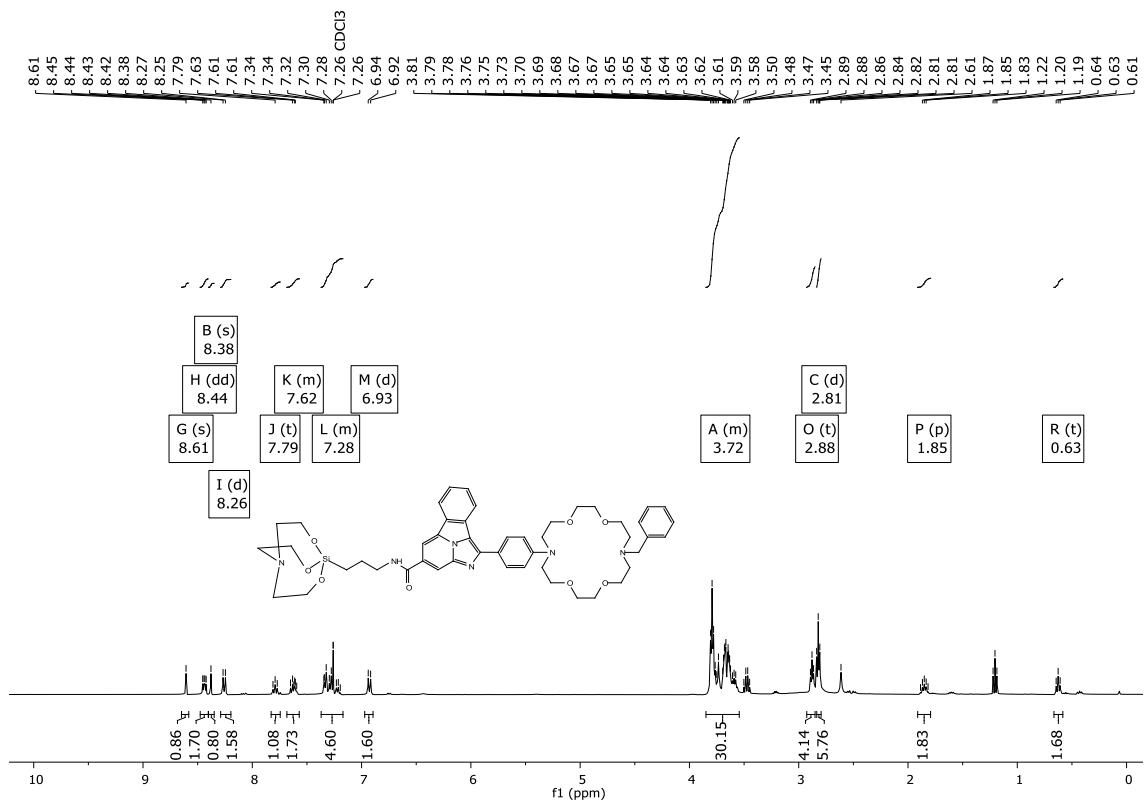

<sup>13</sup>C-NMR

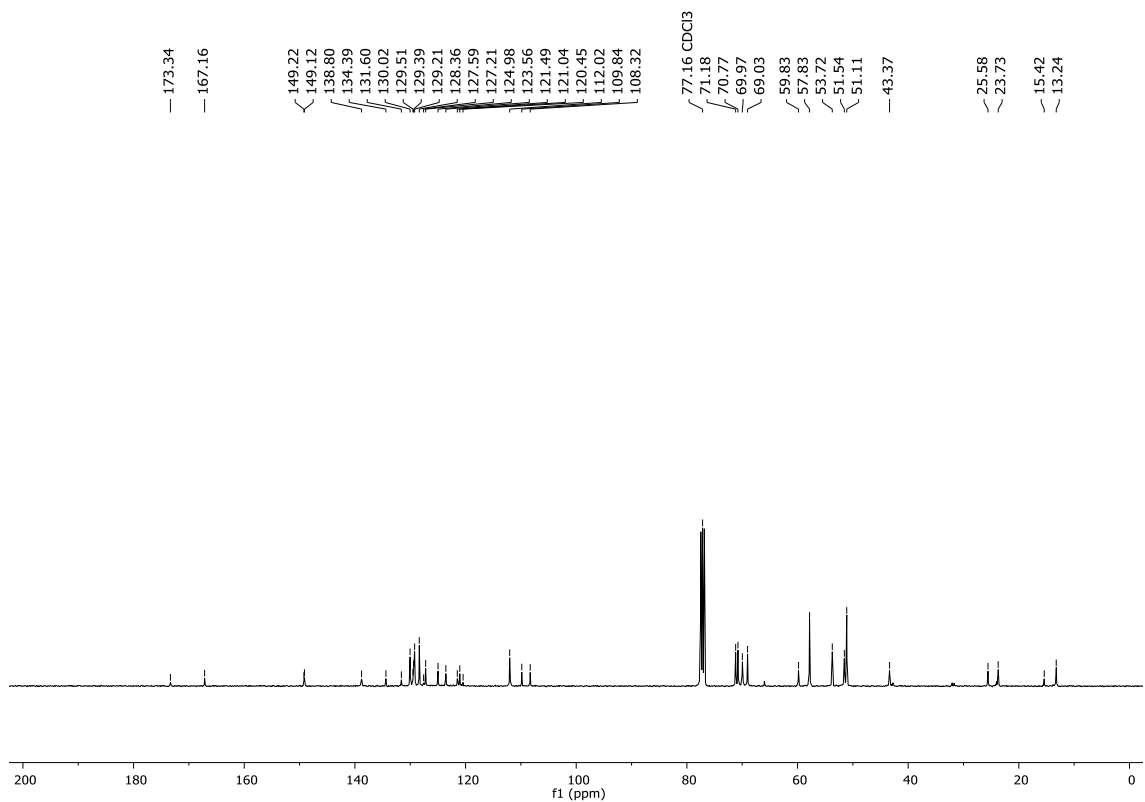

DEPT-135

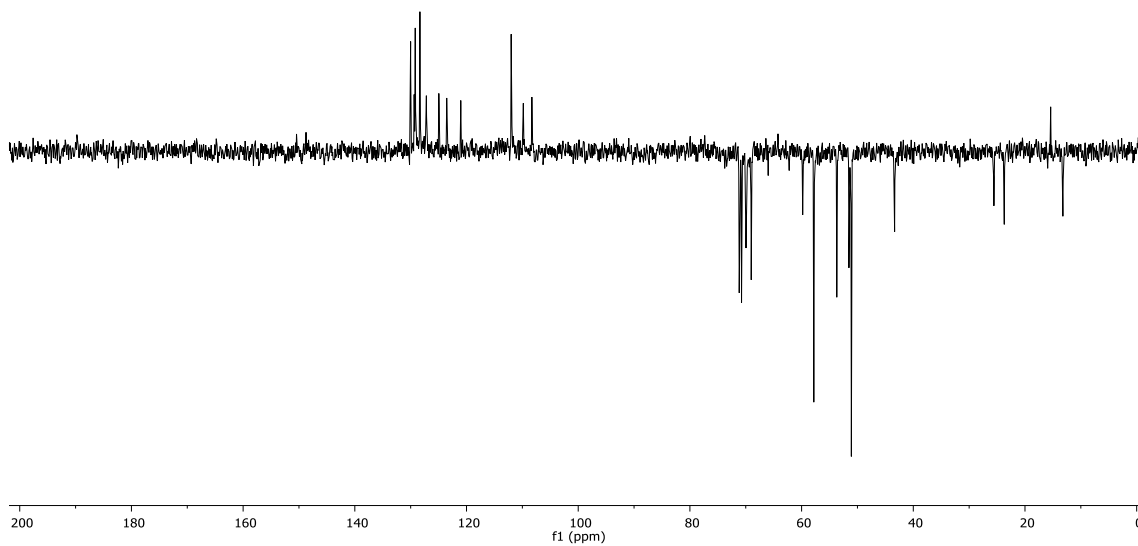

g-COSY

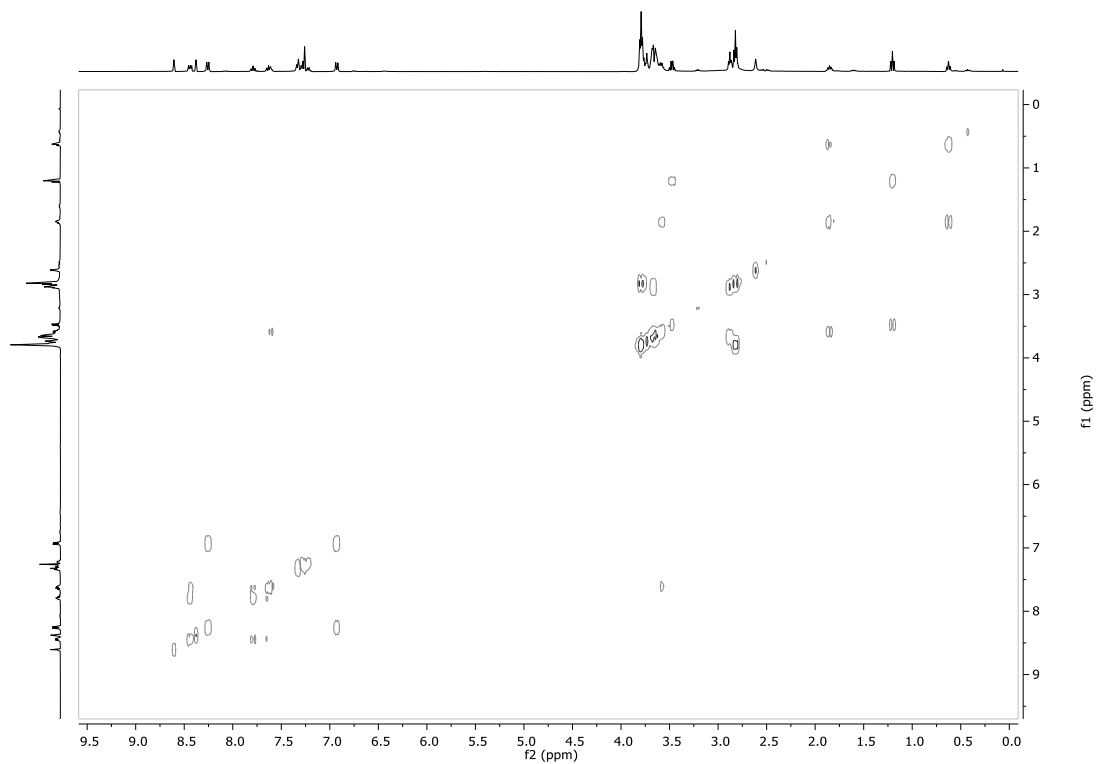

*g*-HSQC

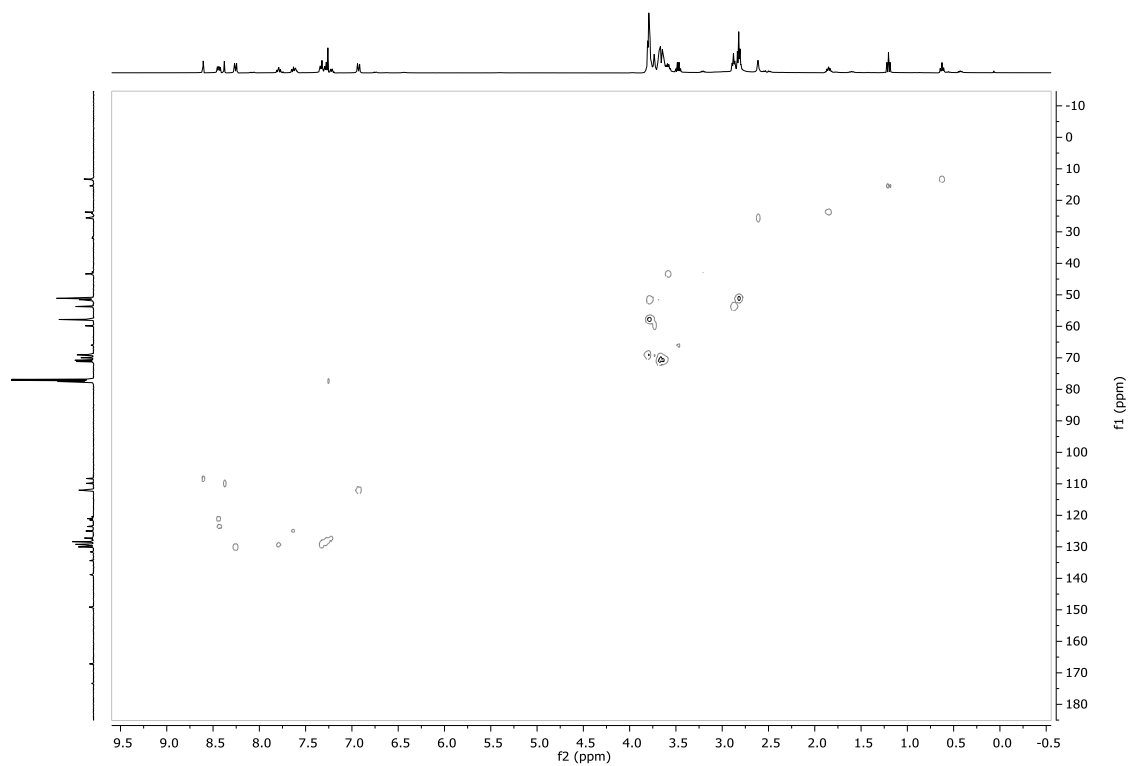

***N*-(11-(2,8,9-trioxa-5-aza-1-silabicyclo[3.3.3]undecan-1-yl)undecyl)-1-(4-(16-benzyl-1,4,10,13-tetraoxa-7,16-diazacyclooctadecan-7-yl)phenyl)benzo[*a*]imidazo[5,1,2-*cd*]indolizine-4-carboxamide (15bb)**

<sup>1</sup>H-NMR

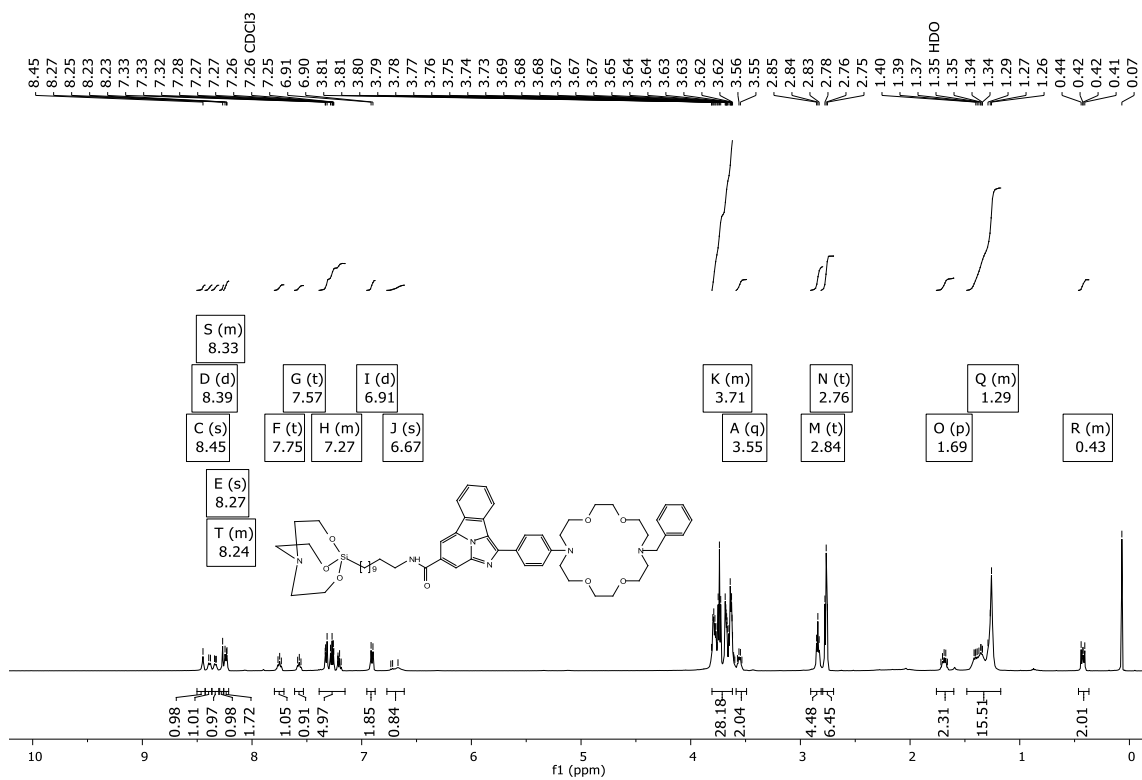

<sup>13</sup>C-NMR

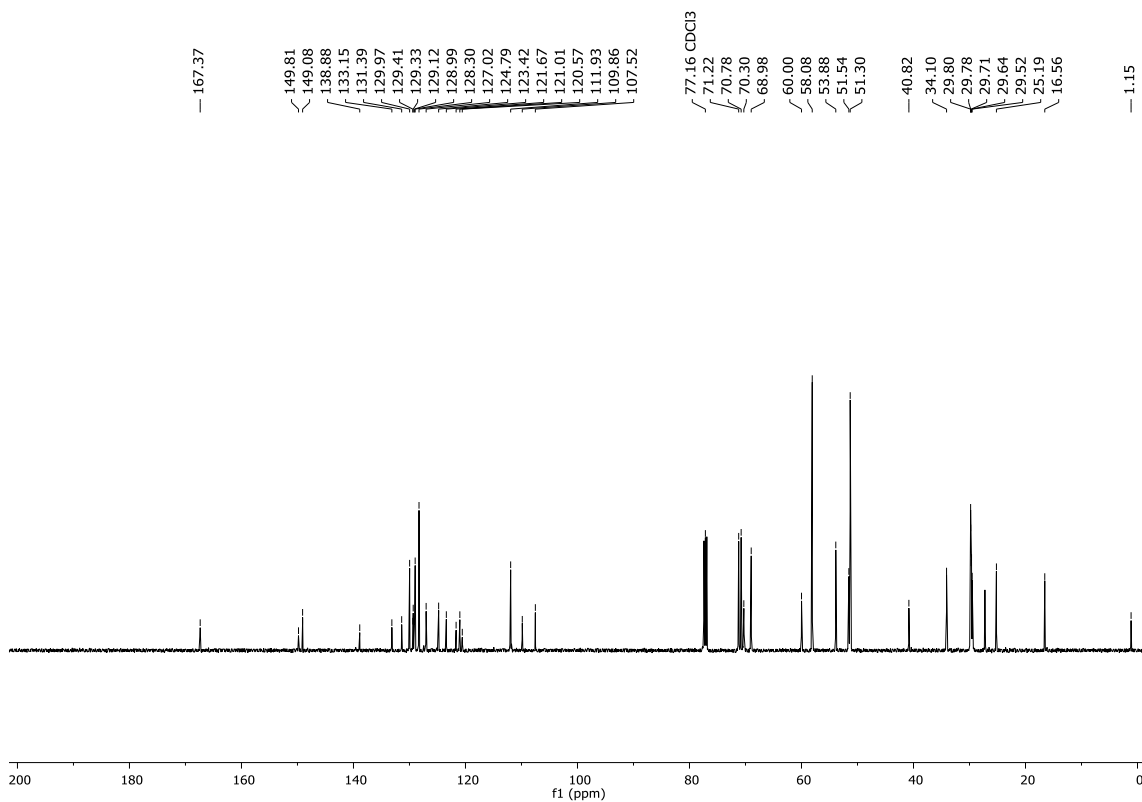

DEPT-135

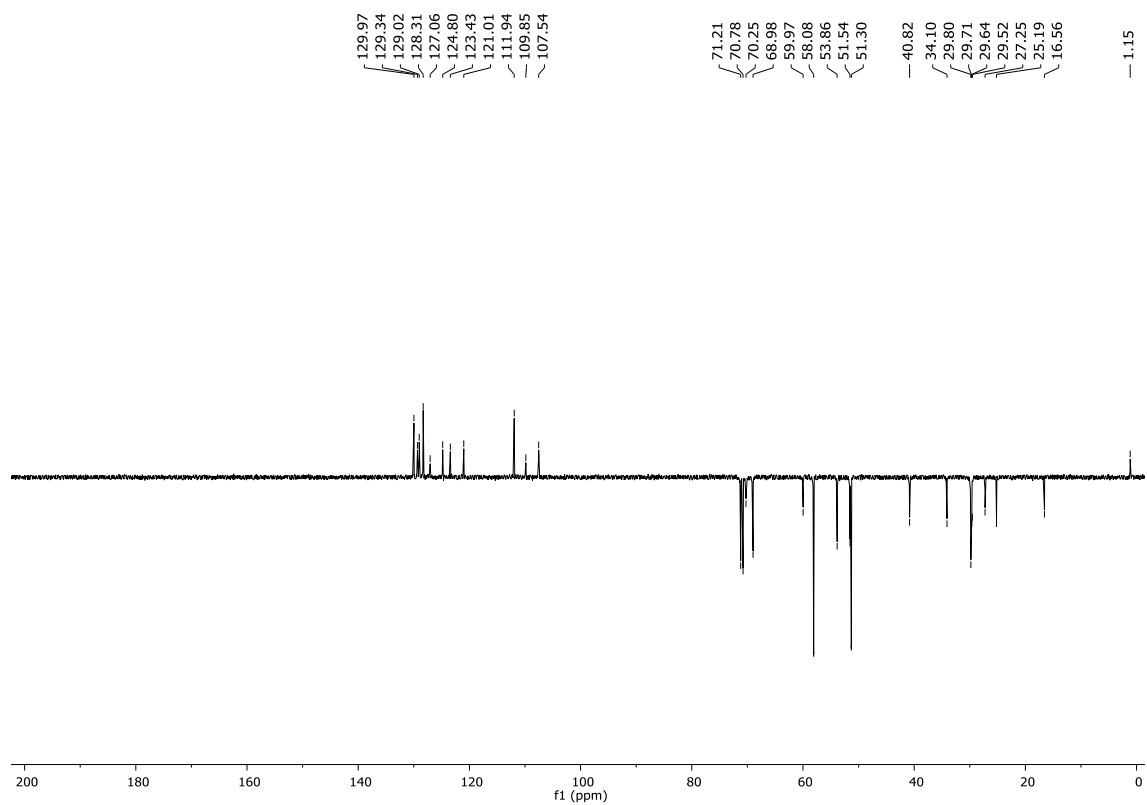

g-COSY

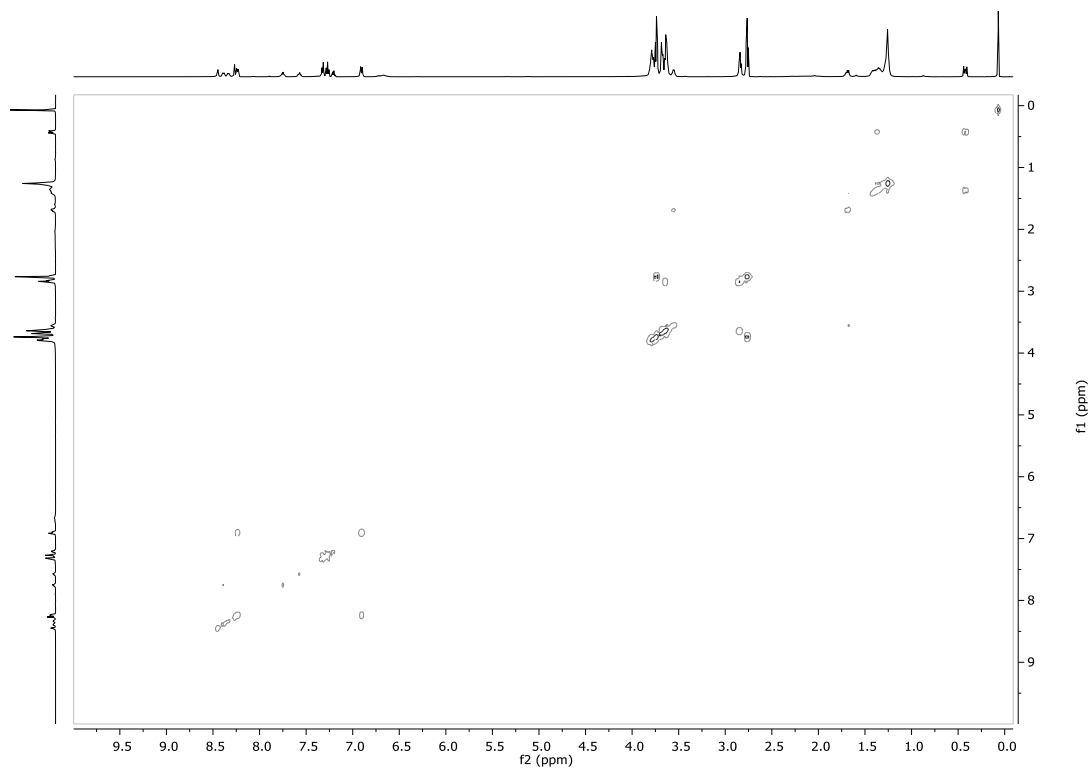

*g*-HSQC

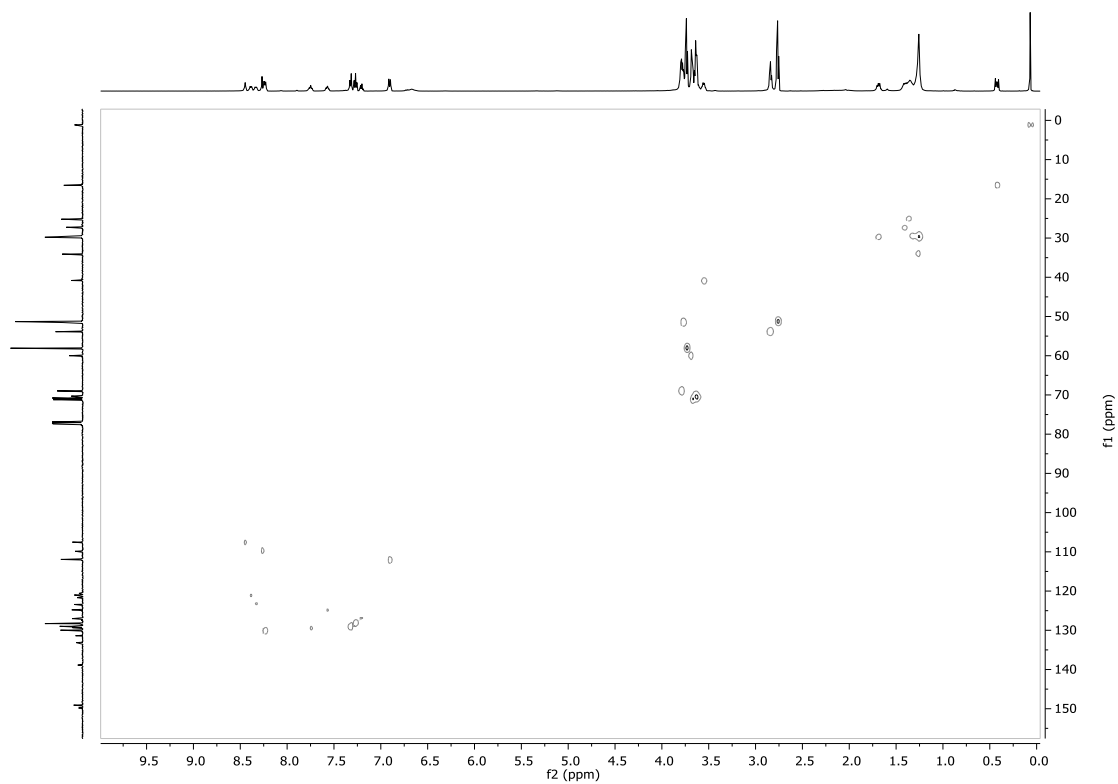

*g*-HMBC

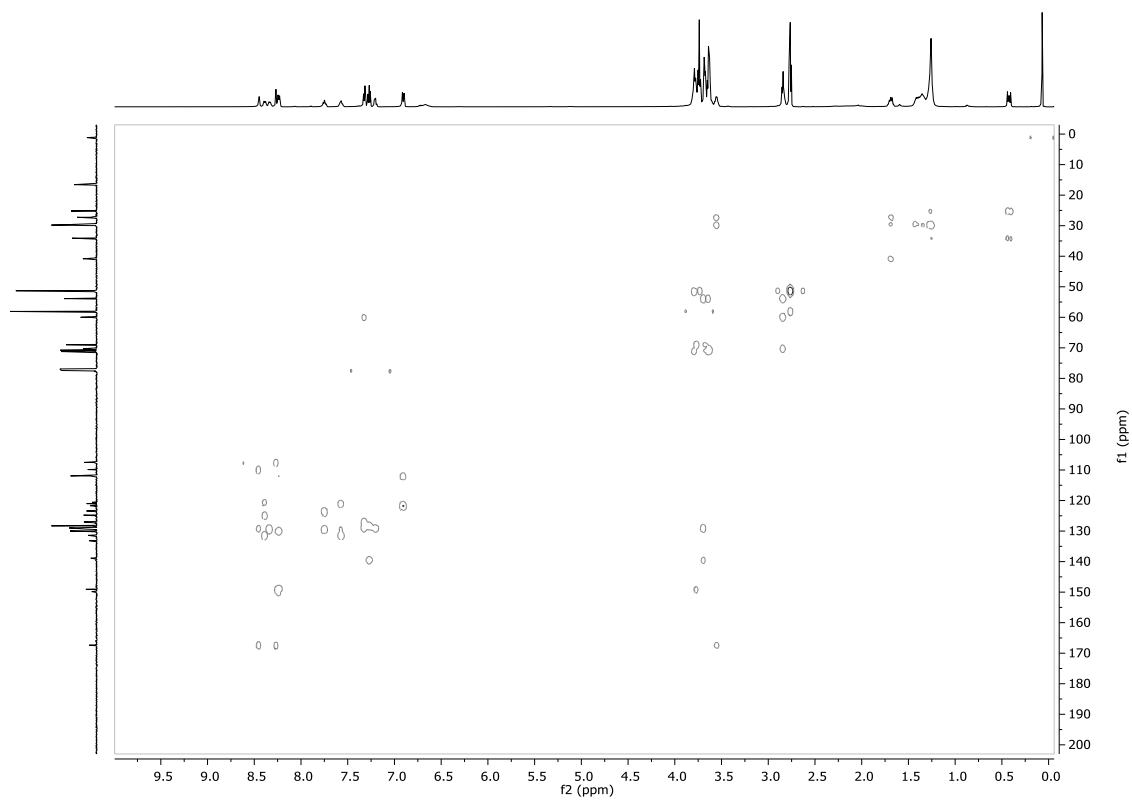



## 5. Photophysical Properties of Compounds 7aa-bb, 14a,b and 15aa-bb.

2-(4-(1,4,7,10,13-Pentaoxa-16-azacyclooctadecan-16-yl)phenyl)-6-((3-(2,8,9-trioxa-5-aza-1-silabicyclo[3.3.3]undecan-1-yl)propyl)amino)-1*H*-benzo[*de*]isoquinoline-1,3(2*H*)-dione (7aa)

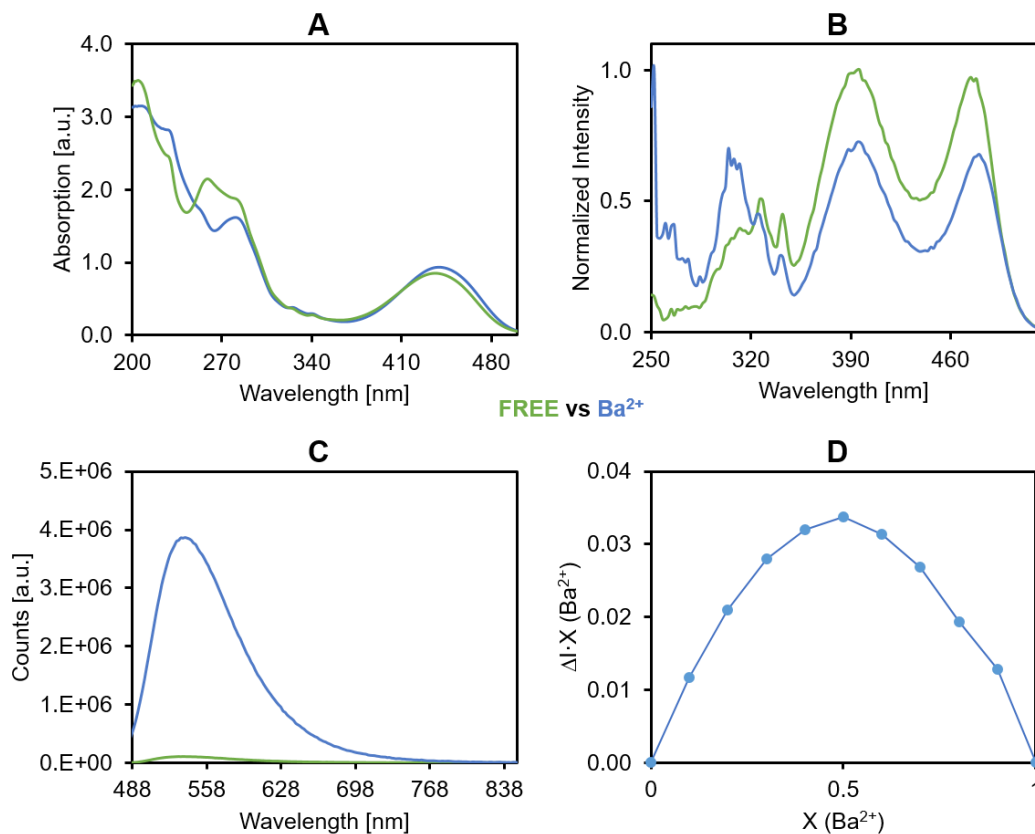

|                                                                                               |                                                                                                                                                |
|-----------------------------------------------------------------------------------------------|------------------------------------------------------------------------------------------------------------------------------------------------|
| Lifetime (ns);                                                                                | $\tau_{\text{free}} = 0.26$ (19.72%), 1.92 (6.29%), 8.94 (73.99%); $\chi^2 = 1.1949$<br>$\tau_{\text{Ba}} = 9.28$ (100.00%); $\chi^2 = 1.1430$ |
| <b>A</b> = Absorption;                                                                        | $\lambda_{\text{free}} = 436$ nm; $\lambda_{\text{Ba}} = 440$ nm                                                                               |
| <b>B</b> = Normalized excitation;                                                             | $\lambda_{\text{free}} = 396, 480$ nm; $\lambda_{\text{Ba}} = 396, 474$ nm                                                                     |
| <b>C</b> = Emission; (exc: $\lambda_{\text{free}} = 396$ nm; $\lambda_{\text{Ba}} = 396$ nm); | $\lambda_{\text{free}} = 534$ nm; $\lambda_{\text{Ba}} = 538$ nm                                                                               |
| <b>D</b> = Job Plot;                                                                          |                                                                                                                                                |

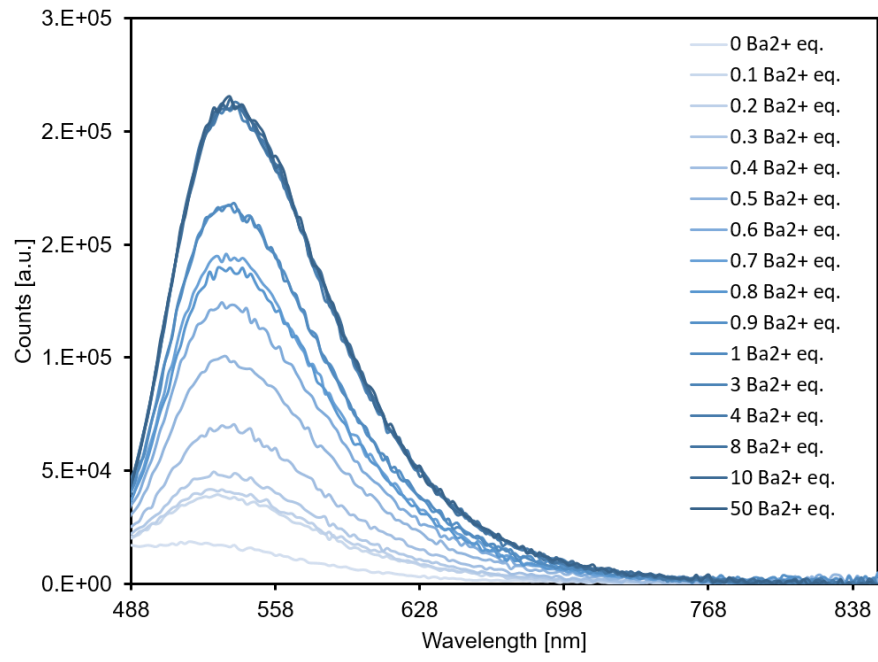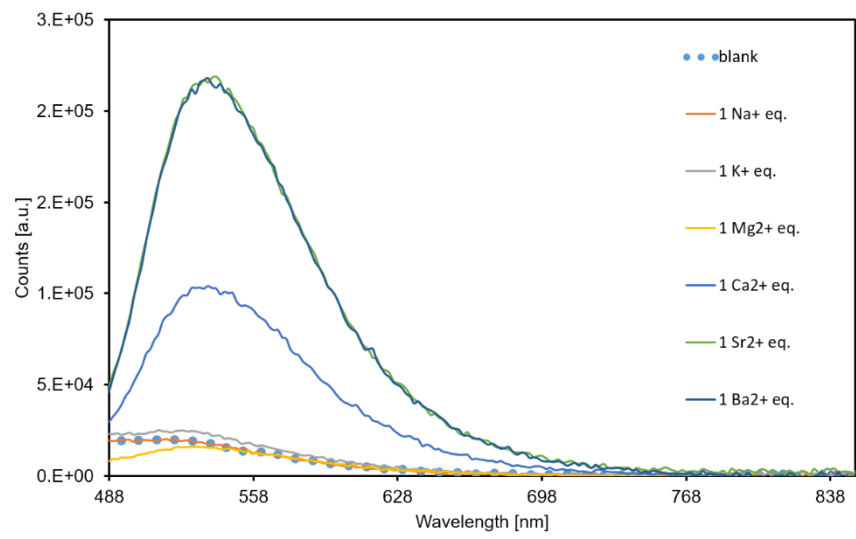

**2-(4-(1,4,7,10,13-Pentaoxa-16-azacyclooctadecan-16-yl)phenyl)-6-((11-(2,8,9-trioxa-5-aza-1-silabicyclo[3.3.3]undecan-1-yl)undecyl)amino)-1*H*-benzo[*de*]isoquinoline-1,3(2*H*)-dione (7ab)**

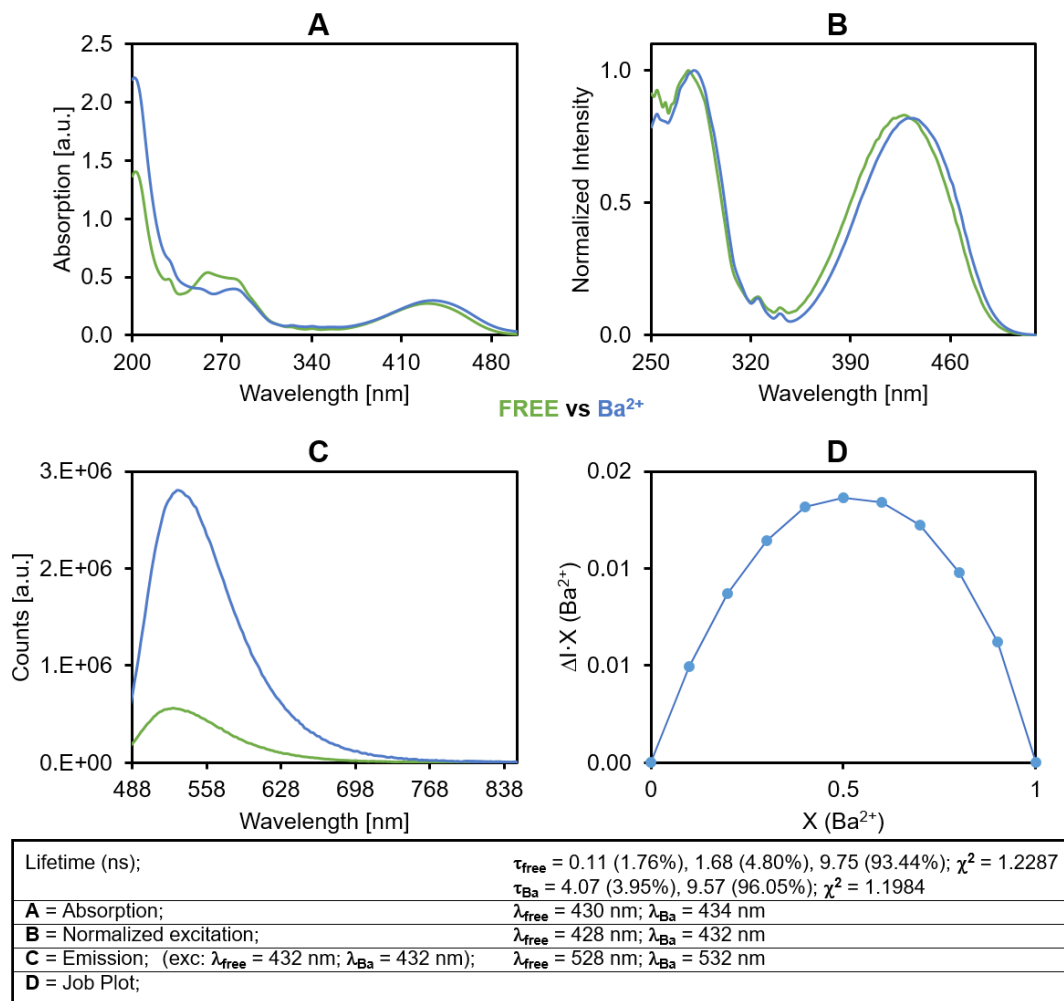

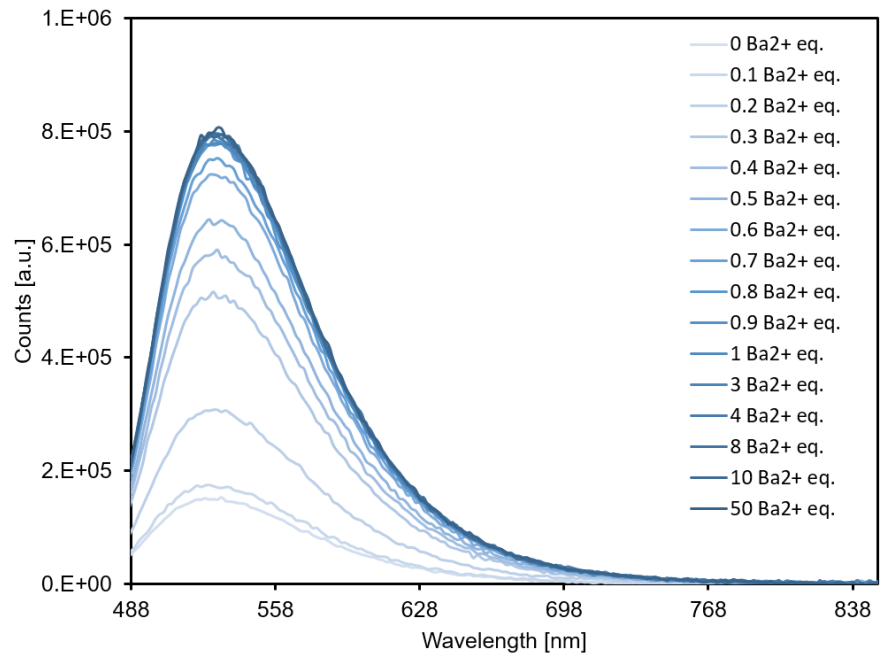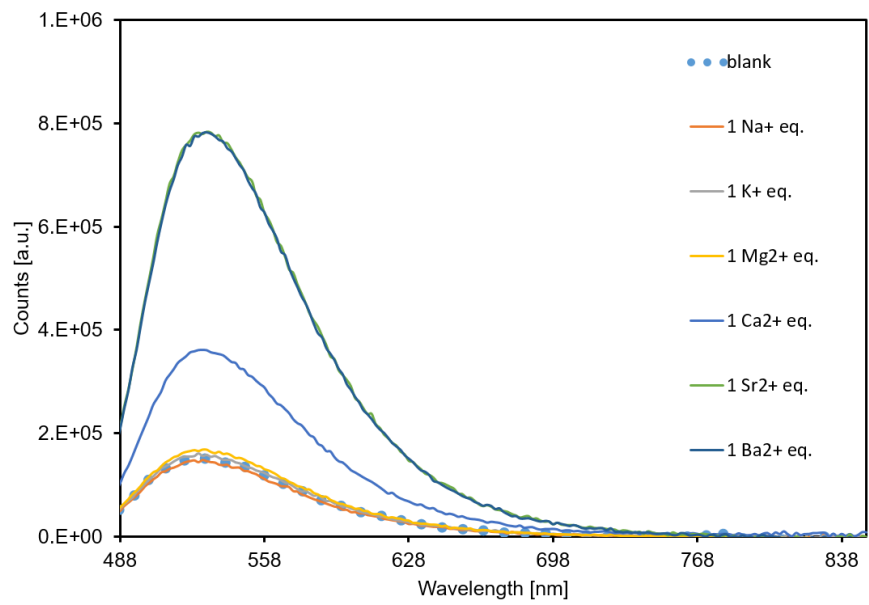

**6-((3-(2,8,9-Trioxa-5-aza-1-silabicyclo[3.3.3]undecan-1-yl)propyl)amino)-2-(4-(16-benzyl-1,4,10,13-tetraoxa-7,16-diazacyclooctadecan-7-yl)phenyl)-1*H*-benzo[*de*]isoquinoline-1,3(2*H*)-dione (7ba)**

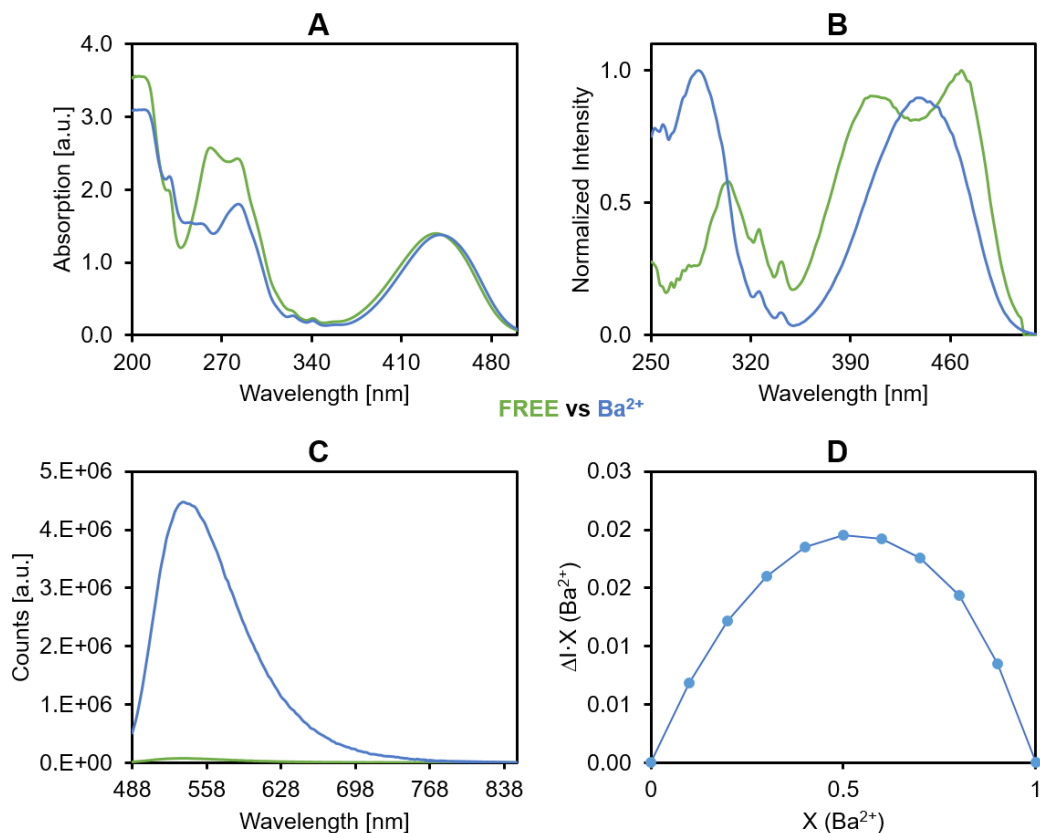

|                                                                                               |                                                                                                                                   |
|-----------------------------------------------------------------------------------------------|-----------------------------------------------------------------------------------------------------------------------------------|
| Lifetime (ns);                                                                                | $\tau_{\text{free}} = 0.35$ (45.20%), $8.72$ (54.80%) $\chi^2 = 1.4777$<br>$\tau_{\text{Ba}} = 8.89$ (100.00%); $\chi^2 = 1.2602$ |
| <b>A</b> = Absorption;                                                                        | $\lambda_{\text{free}} = 437$ nm; $\lambda_{\text{Ba}} = 440$ nm                                                                  |
| <b>B</b> = Normalized excitation;                                                             | $\lambda_{\text{free}} = 406, 468$ nm; $\lambda_{\text{Ba}} = 438$ nm                                                             |
| <b>C</b> = Emission; (exc: $\lambda_{\text{free}} = 468$ nm; $\lambda_{\text{Ba}} = 468$ nm); | $\lambda_{\text{free}} = 536$ nm; $\lambda_{\text{Ba}} = 540$ nm                                                                  |
| <b>D</b> = Job Plot;                                                                          |                                                                                                                                   |

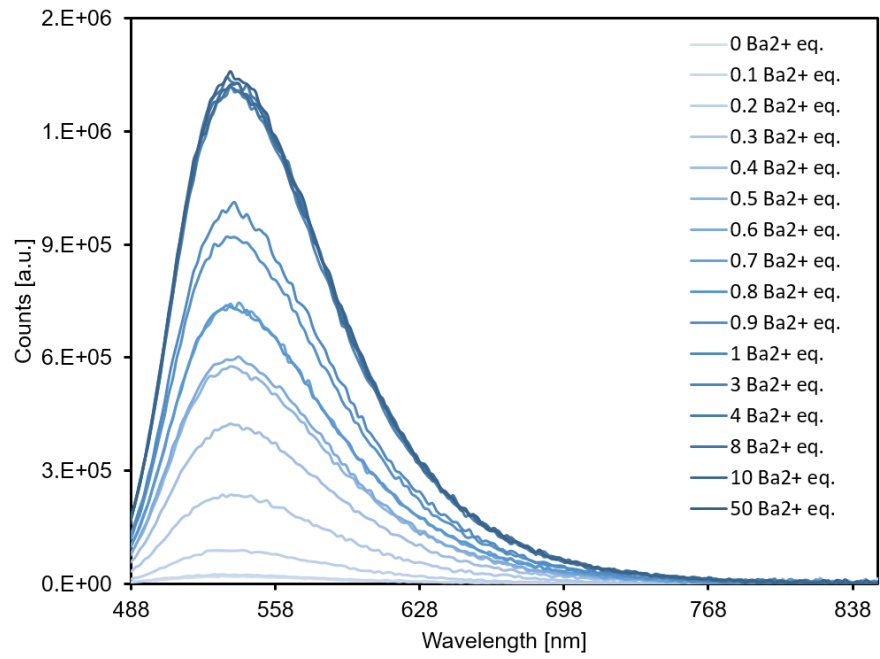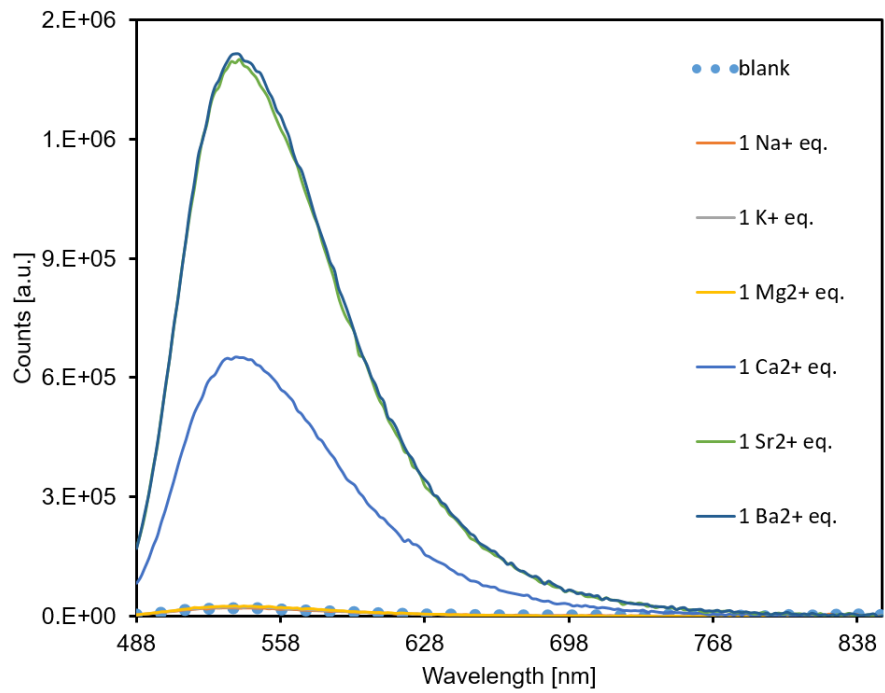

**6-((11-(2,8,9-Trioxa-5-aza-1-silabicyclo[3.3.3]undecan-1-yl)undecyl)amino)-2-(4-(16-benzyl-1,4,10,13-tetraoxa-7,16-diazacyclooctadecan-7-yl)phenyl)-1H-benzo[de]isoquinoline-1,3(2H)-dione (7bb)**

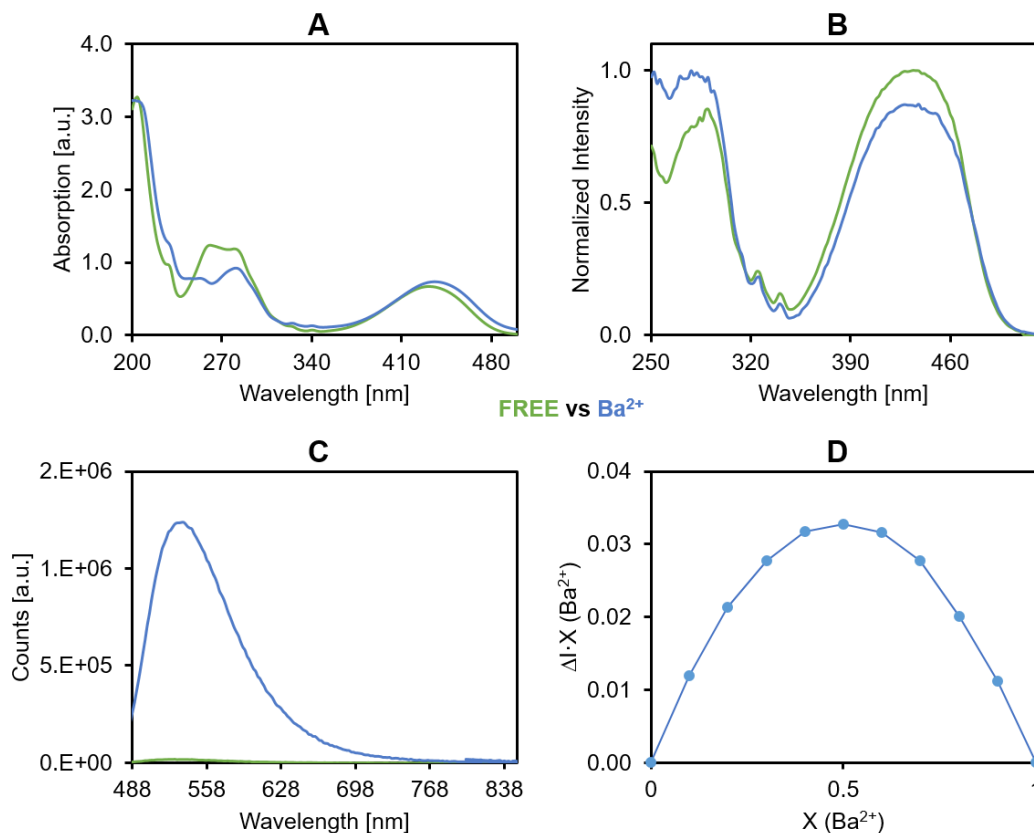

|                                                                                               |                                                                                                                                                    |
|-----------------------------------------------------------------------------------------------|----------------------------------------------------------------------------------------------------------------------------------------------------|
| Lifetime (ns);                                                                                | $\tau_{\text{free}} = 0.04$ (16.53%), $0.59$ (6.31%), $9.56$ (77.17%); $\chi^2 = 1.0880$<br>$\tau_{\text{Ba}} = 8.85$ (100.00%); $\chi^2 = 1.1436$ |
| <b>A</b> = Absorption;                                                                        | $\lambda_{\text{free}} = 432$ nm; $\lambda_{\text{Ba}} = 436$ nm                                                                                   |
| <b>B</b> = Normalized excitation;                                                             | $\lambda_{\text{free}} = 434$ nm; $\lambda_{\text{Ba}} = 438$ nm                                                                                   |
| <b>C</b> = Emission; (exc: $\lambda_{\text{free}} = 438$ nm; $\lambda_{\text{Ba}} = 438$ nm); | $\lambda_{\text{free}} = 528$ nm; $\lambda_{\text{Ba}} = 534$ nm                                                                                   |
| <b>D</b> = Job Plot;                                                                          |                                                                                                                                                    |

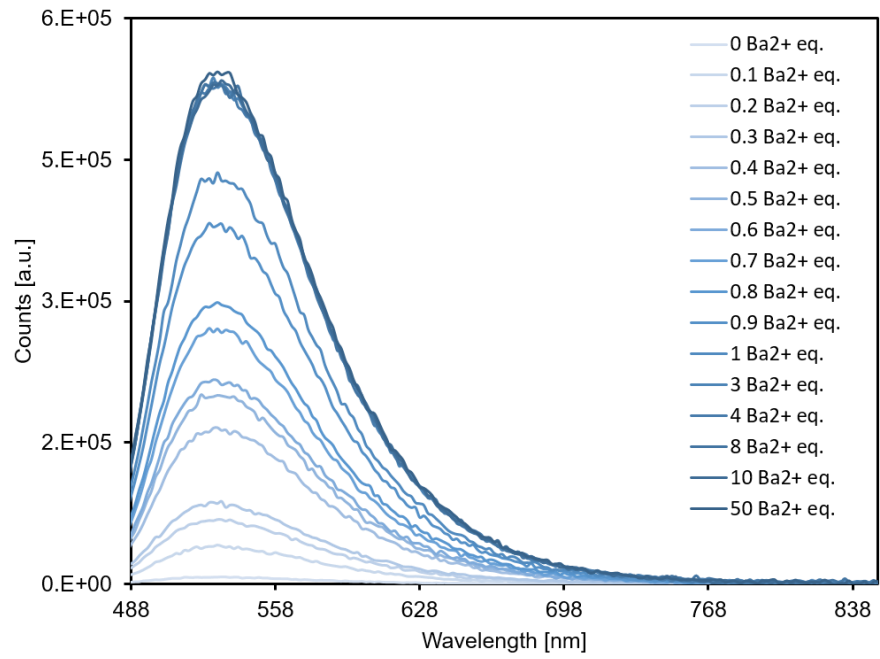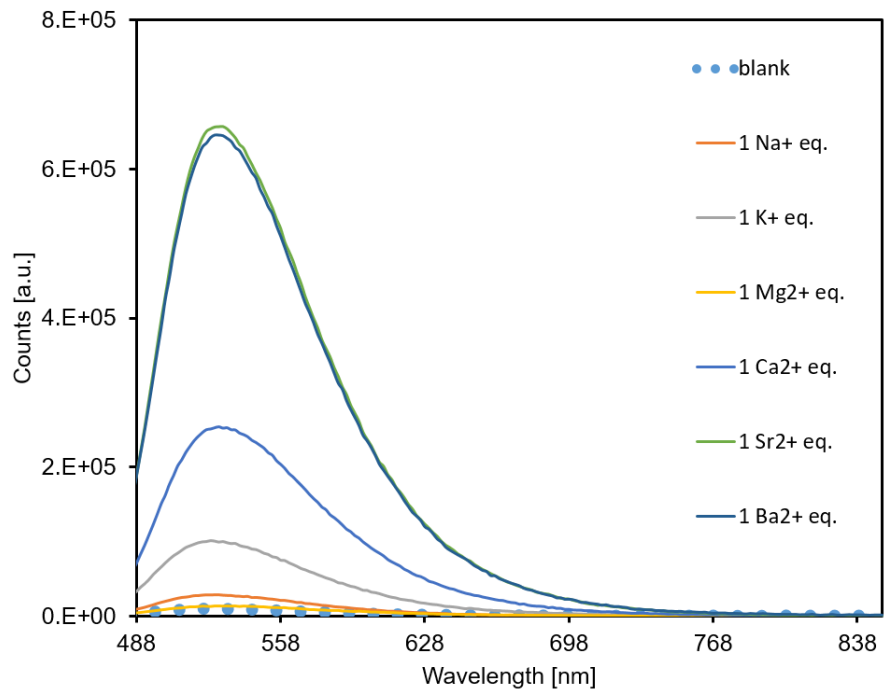



**Methyl 1-(4-(1,4,7,10,13-pentaoxa-16-azacyclooctadecan-16-yl)phenyl)benzo[*a*]imidazo[5,1,2-*cd*]indolizine-4-carboxylate (14a)**

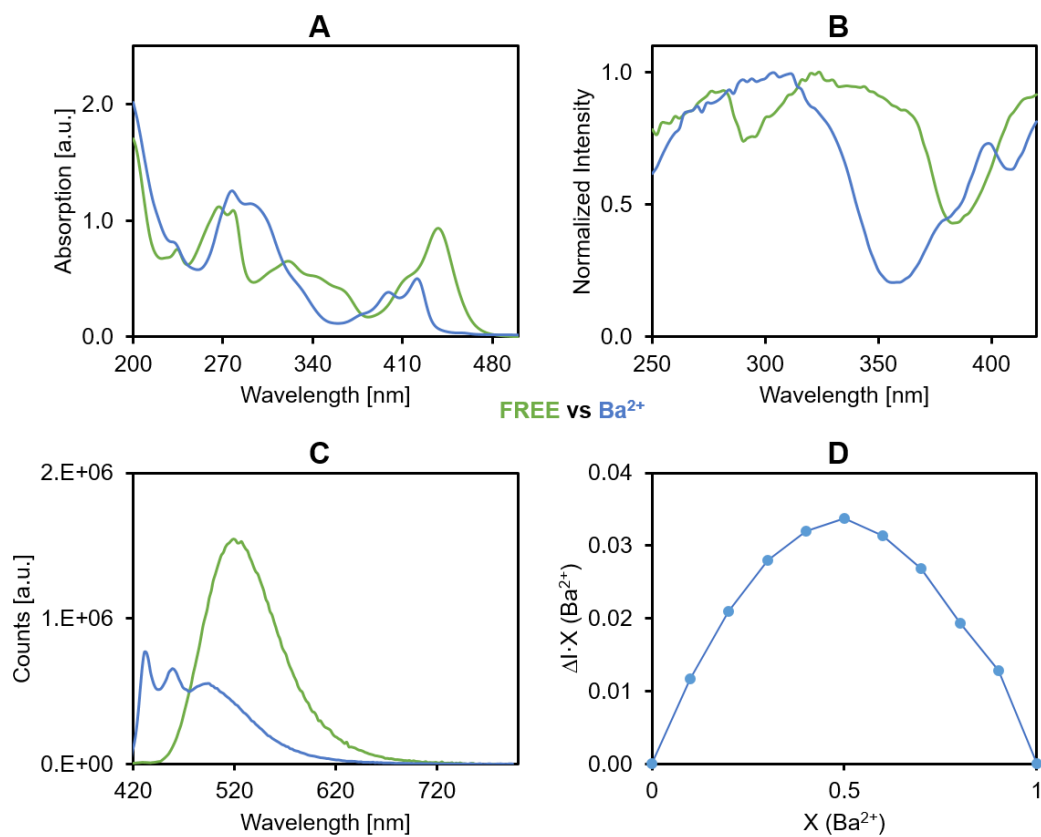

|                                                                                               |                                                                                                                                    |
|-----------------------------------------------------------------------------------------------|------------------------------------------------------------------------------------------------------------------------------------|
| Lifetime (ns);                                                                                | $\tau_{\text{free}} = 3.21$ (74.57%), $4.33$ (25.43%); $\chi^2 = 1.1898$<br>$\tau_{\text{Ba}} = 3.26$ (100.00%); $\chi^2 = 1.5850$ |
| <b>A</b> = Absorption;                                                                        | $\lambda_{\text{free}} = 438$ nm; $\lambda_{\text{Ba}} = 421$ nm                                                                   |
| <b>B</b> = Normalized excitation;                                                             | $\lambda_{\text{free}} = 324$ nm; $\lambda_{\text{Ba}} = 400$ nm                                                                   |
| <b>C</b> = Emission; (exc: $\lambda_{\text{free}} = 324$ nm; $\lambda_{\text{Ba}} = 400$ nm); | $\lambda_{\text{free}} = 520$ nm; $\lambda_{\text{Ba}} = 431, 463, 497$ nm                                                         |
| <b>D</b> = Job Plot;                                                                          |                                                                                                                                    |

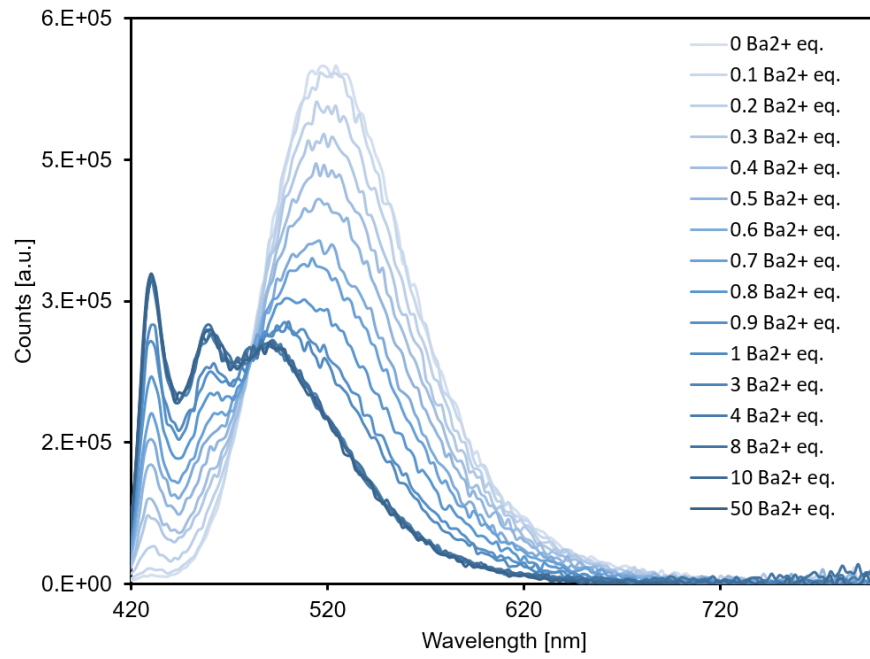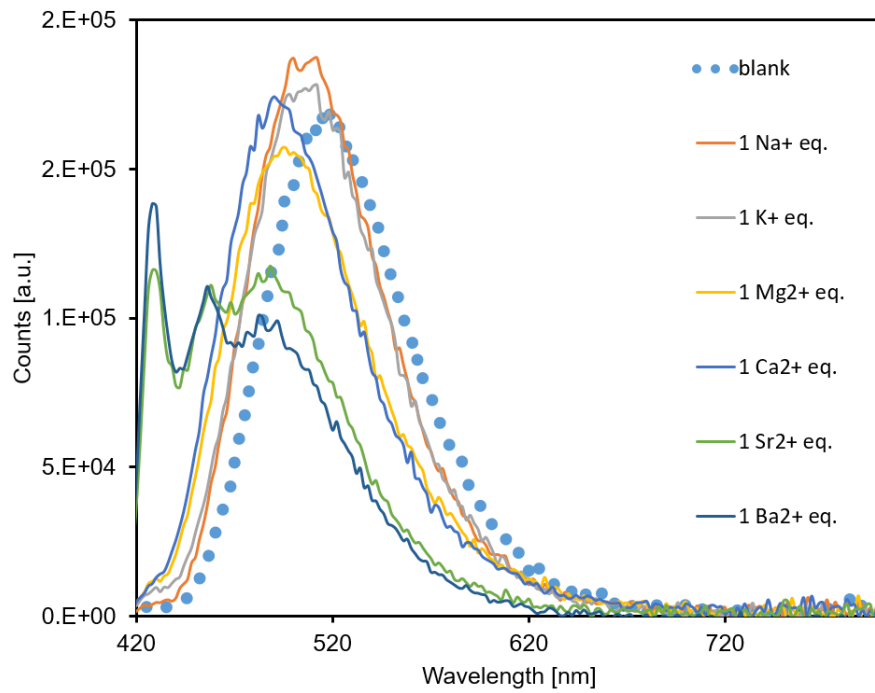

**Methyl 1-(4-(16-benzyl-1,4,10,13-tetraoxa-7,16-diazacyclooctadecan-7-yl)phenyl)benzo[*a*]imidazo[5,1,2-*cd*]indolizine-4-carboxylate (14b)**

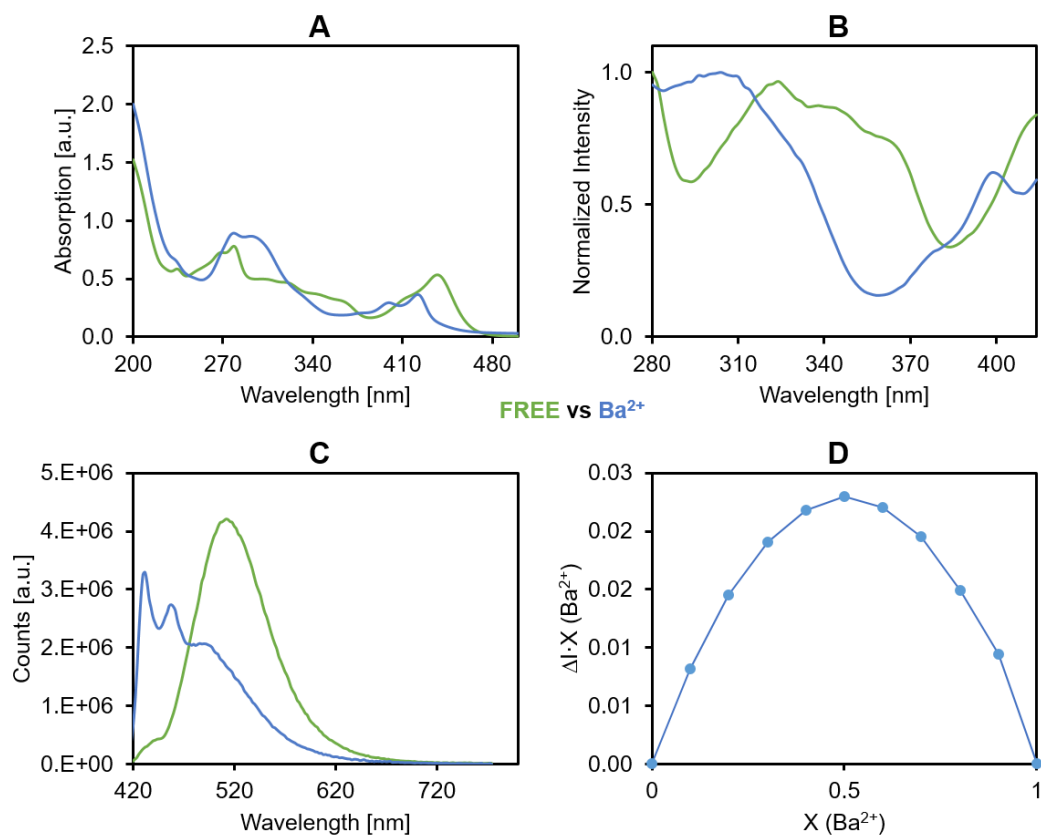

|                                                                                               |                                                                                                                                               |
|-----------------------------------------------------------------------------------------------|-----------------------------------------------------------------------------------------------------------------------------------------------|
| Lifetime (ns);                                                                                | $\tau_{\text{free}} = 3.31$ (97.12%), 9.19 (2.88%); $\chi^2 = 1.1130$<br>$\tau_{\text{Ba}} = 2.07$ (56.47%), 3.51 (43.53%); $\chi^2 = 1.2907$ |
| <b>A</b> = Absorption;                                                                        | $\lambda_{\text{free}} = 441$ nm; $\lambda_{\text{Ba}} = 424$ nm                                                                              |
| <b>B</b> = Normalized excitation;                                                             | $\lambda_{\text{free}} = 324$ nm; $\lambda_{\text{Ba}} = 400$ nm                                                                              |
| <b>C</b> = Emission; (exc: $\lambda_{\text{free}} = 324$ nm; $\lambda_{\text{Ba}} = 400$ nm); | $\lambda_{\text{free}} = 514$ nm; $\lambda_{\text{Ba}} = 432, 462, 494$ nm                                                                    |
| <b>D</b> = Job Plot;                                                                          |                                                                                                                                               |

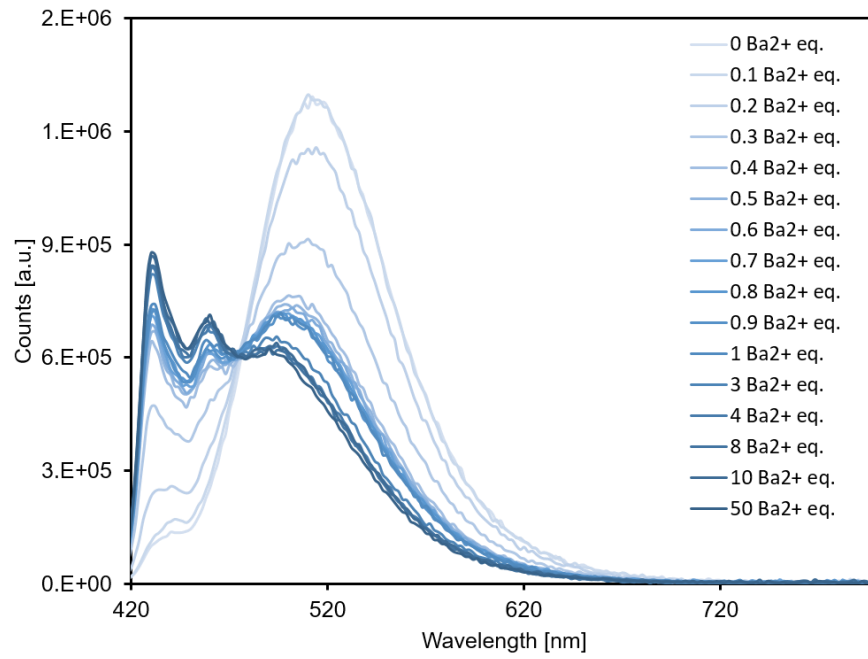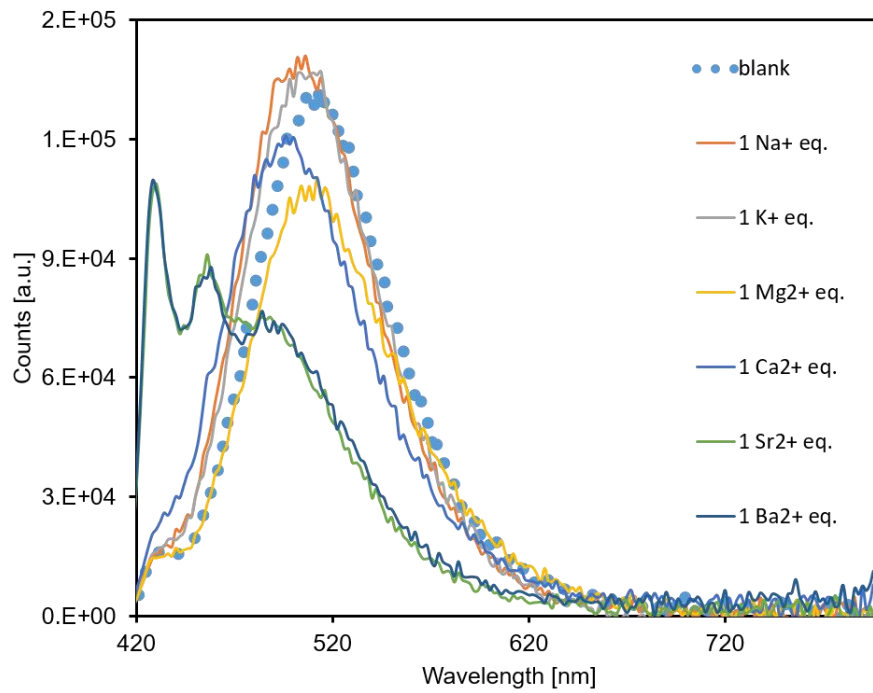

**1-(4-(1,4,7,10,13-Pentaoxa-16-azacyclooctadecan-16-yl)phenyl)-N-(3-(2,8,9-trioxa-5-aza-1-silabicyclo[3.3.3]undecan-1-yl)propyl)benzo[*a*]imidazo[5,1,2-*cd*]indolizine-4-carboxamide (15aa)**

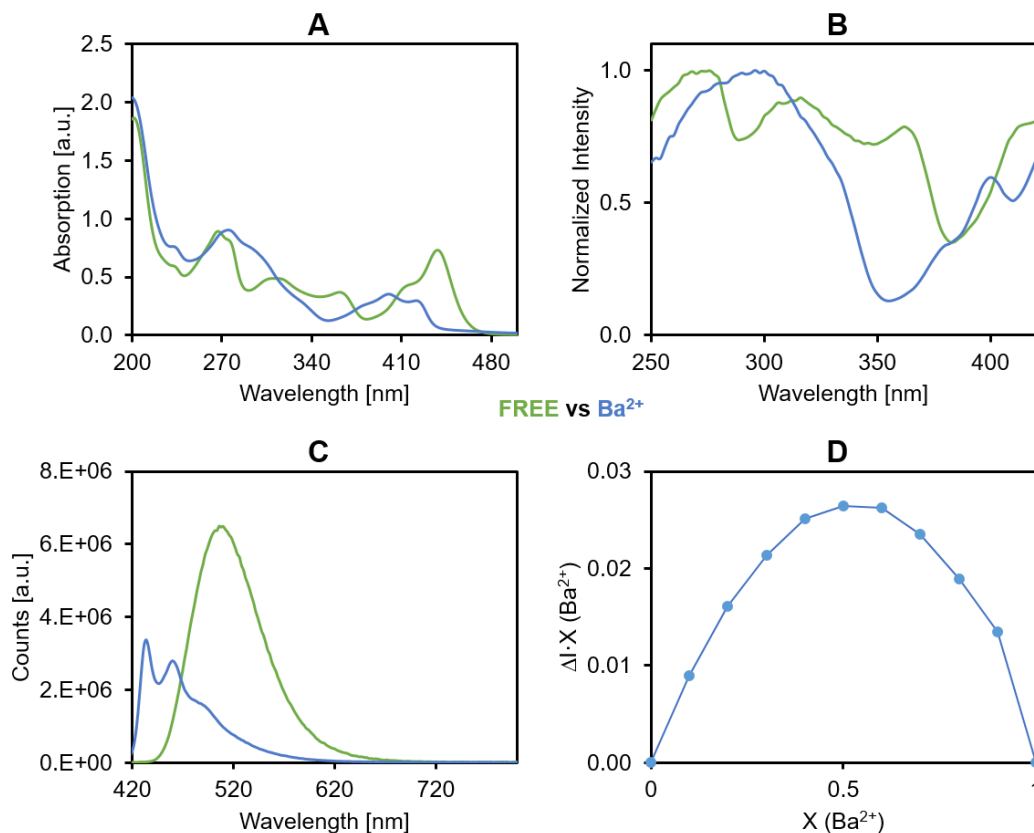

|                                                                                               |                                                                                                                                  |
|-----------------------------------------------------------------------------------------------|----------------------------------------------------------------------------------------------------------------------------------|
| Lifetime (ns);                                                                                | $\tau_{\text{free}} = 3.35$ (98.00%), 14.53 (2.00%); $\chi^2 = 1.1758$<br>$\tau_{\text{Ba}} = 3.71$ (100.00%); $\chi^2 = 1.2310$ |
| <b>A</b> = Absorption;                                                                        | $\lambda_{\text{free}} = 442$ nm; $\lambda_{\text{Ba}} = 404$ nm                                                                 |
| <b>B</b> = Normalized excitation;                                                             | $\lambda_{\text{free}} = 316$ nm; $\lambda_{\text{Ba}} = 400$ nm                                                                 |
| <b>C</b> = Emission; (exc: $\lambda_{\text{free}} = 316$ nm; $\lambda_{\text{Ba}} = 400$ nm); | $\lambda_{\text{free}} = 508$ nm; $\lambda_{\text{Ba}} = 434, 462, 494$ nm                                                       |
| <b>D</b> = Job Plot;                                                                          |                                                                                                                                  |

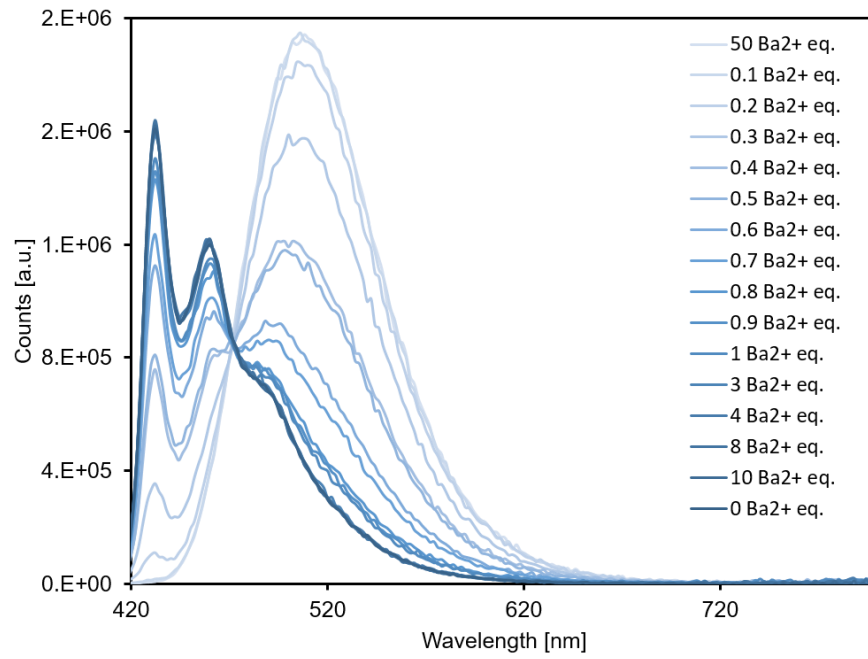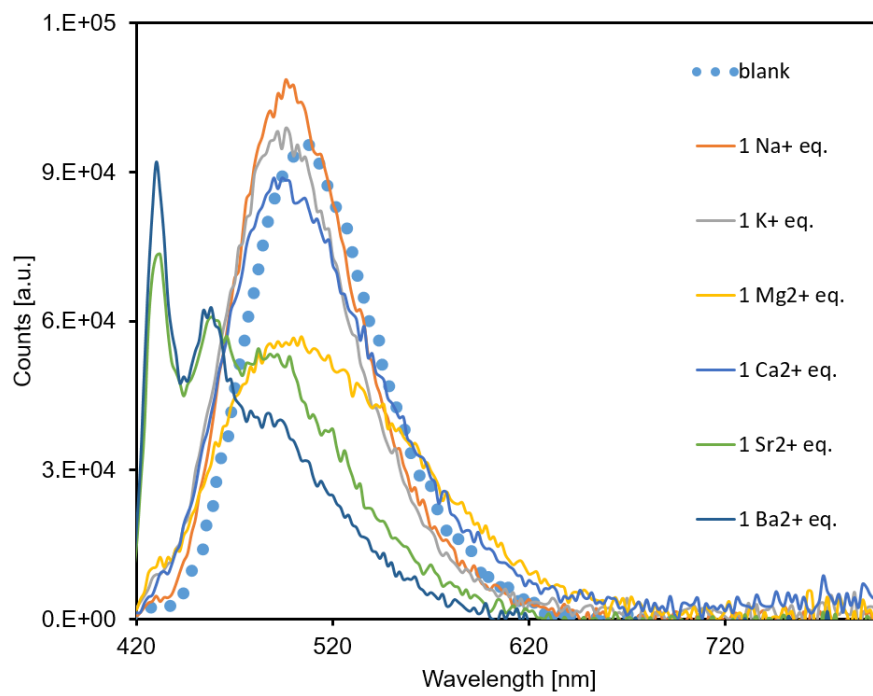

**1-(4-(1,4,7,10,13-Pentaoxa-16-azacyclooctadecan-16-yl)phenyl)-N-(11-(2,8,9-trioxa-5-aza-1-silabicyclo[3.3.3]undecan-1-yl)undecyl)benzo[*a*]imidazo[5,1,2-*cd*]indolizine-4-carboxamide (15ab)**

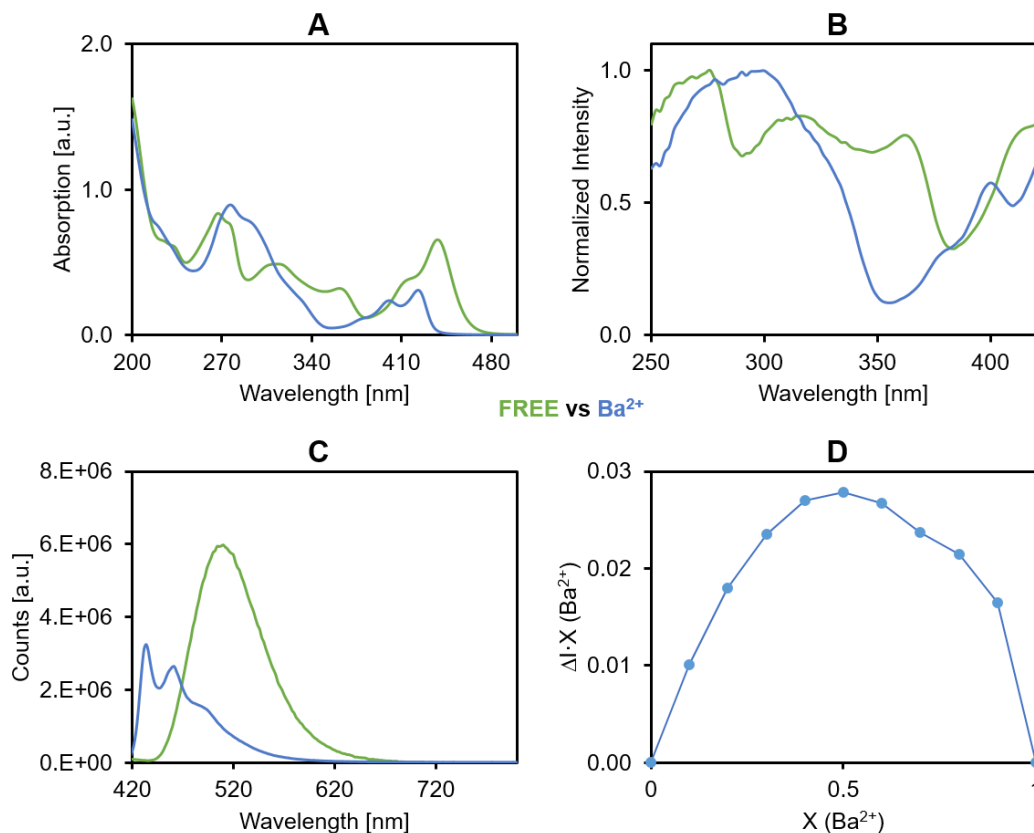

|                                                                                               |                                                                                                                    |
|-----------------------------------------------------------------------------------------------|--------------------------------------------------------------------------------------------------------------------|
| Lifetime (ns);                                                                                | $\tau_{\text{free}} = 3.38$ (100.00%); $\chi^2 = 1.3521$<br>$\tau_{\text{Ba}} = 3.53$ (100.00%); $\chi^2 = 1.4100$ |
| <b>A</b> = Absorption;                                                                        | $\lambda_{\text{free}} = 442$ nm; $\lambda_{\text{Ba}} = 426$ nm                                                   |
| <b>B</b> = Normalized excitation;                                                             | $\lambda_{\text{free}} = 316$ nm; $\lambda_{\text{Ba}} = 400$ nm                                                   |
| <b>C</b> = Emission; (exc: $\lambda_{\text{free}} = 316$ nm; $\lambda_{\text{Ba}} = 400$ nm); | $\lambda_{\text{free}} = 504$ nm; $\lambda_{\text{Ba}} = 432, 464, 494$ nm                                         |
| <b>D</b> = Job Plot;                                                                          |                                                                                                                    |

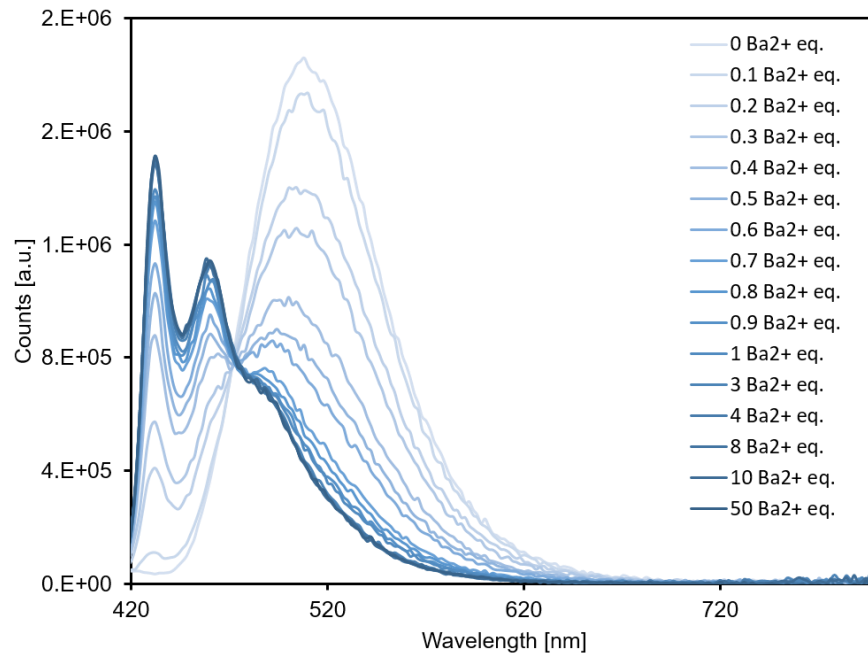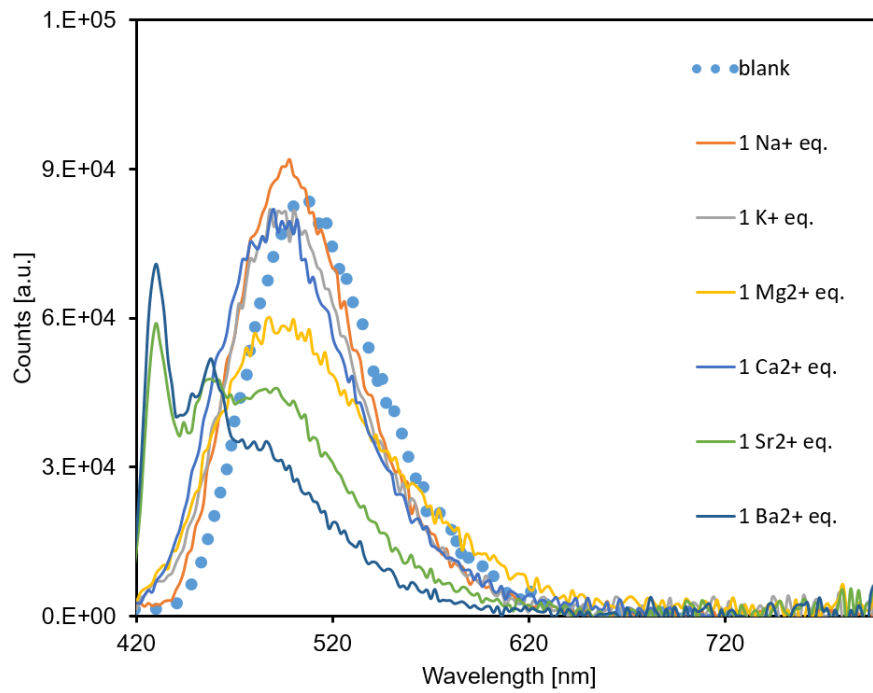



***N*-(3-(2,8,9-trioxa-5-aza-1-silabicyclo[3.3.3]undecan-1-yl)propyl)-1-(4-(16-benzyl-1,4,10,13-tetraoxa-7,16-diazacyclooctadecan-7-yl)phenyl)benzo[*a*]imidazo[5,1,2-*cd*]indolizine-4-carboxamide (15ba)**

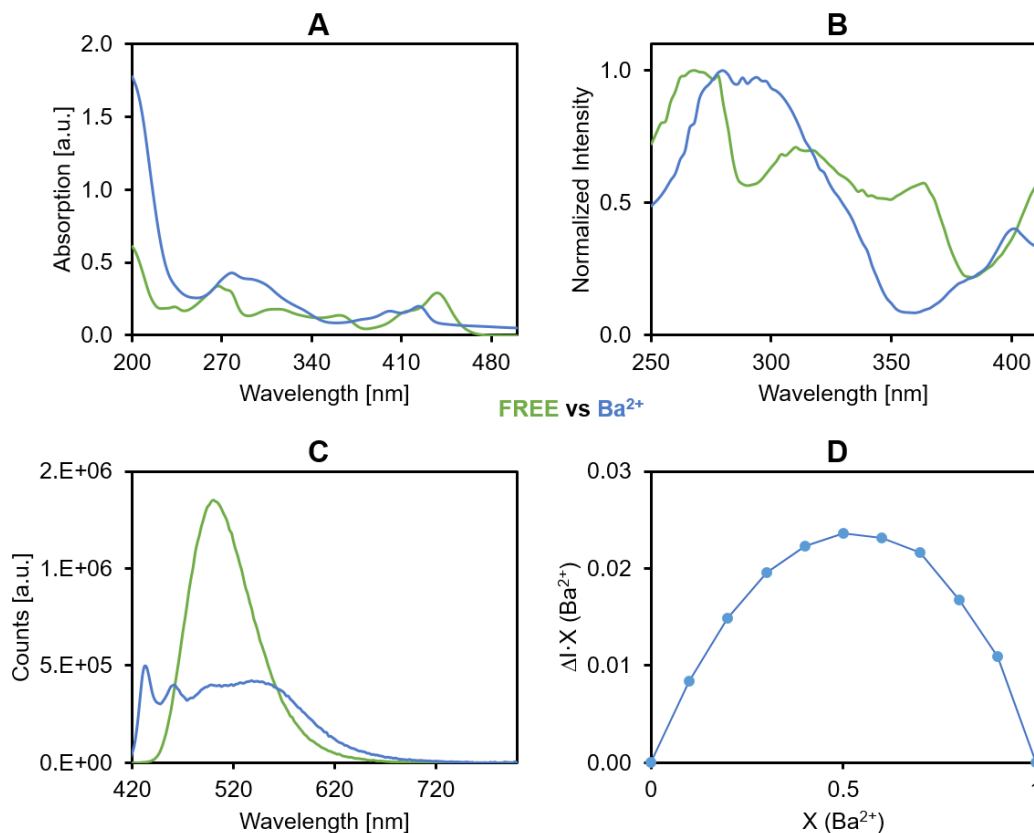

|                                                                                               |                                                                                                                                  |
|-----------------------------------------------------------------------------------------------|----------------------------------------------------------------------------------------------------------------------------------|
| Lifetime (ns);                                                                                | $\tau_{\text{free}} = 3.22$ (100.00%); $\chi^2 = 1.2197$<br>$\tau_{\text{Ba}} = 2.62$ (80.59%), 4.25 (19.41%); $\chi^2 = 1.0968$ |
| <b>A</b> = Absorption;                                                                        | $\lambda_{\text{free}} = 442$ nm; $\lambda_{\text{Ba}} = 428$ nm                                                                 |
| <b>B</b> = Normalized excitation;                                                             | $\lambda_{\text{free}} = 314$ nm; $\lambda_{\text{Ba}} = 400$ nm                                                                 |
| <b>C</b> = Emission; (exc: $\lambda_{\text{free}} = 314$ nm; $\lambda_{\text{Ba}} = 400$ nm); | $\lambda_{\text{free}} = 502$ nm; $\lambda_{\text{Ba}} = 432, 464, 498$ nm                                                       |
| <b>D</b> = Job Plot;                                                                          |                                                                                                                                  |

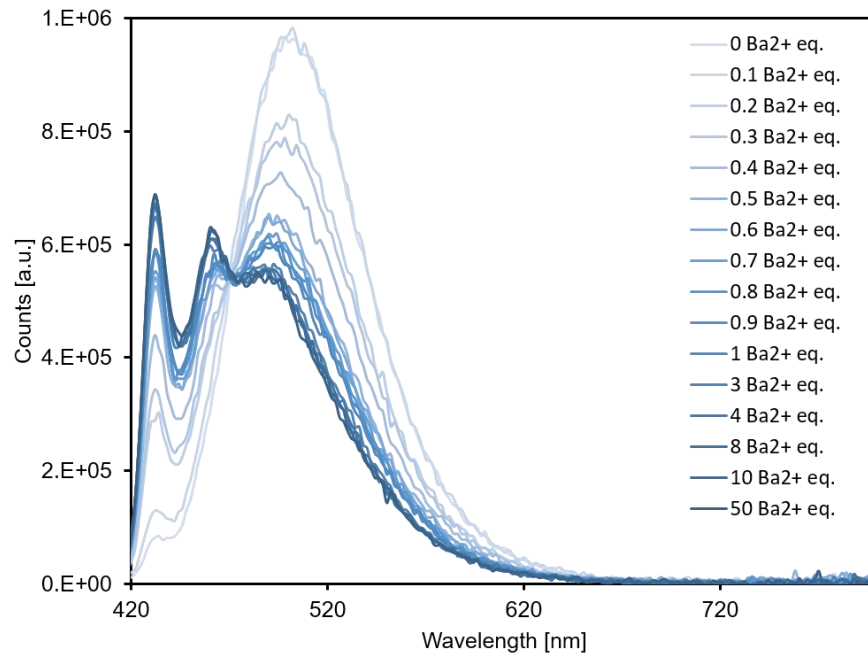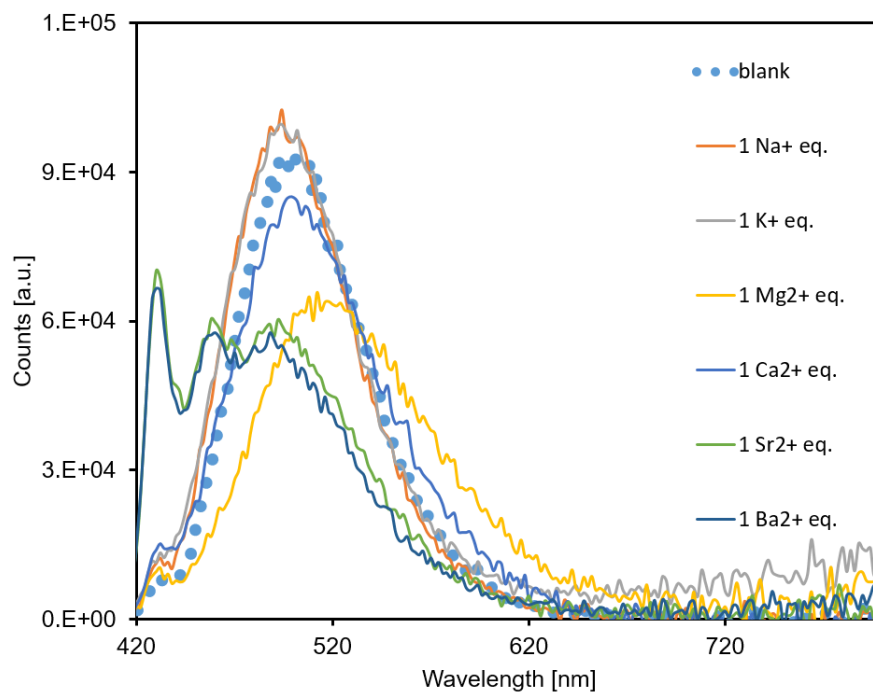

***N*-(11-(2,8,9-trioxa-5-aza-1-silabicyclo[3.3.3]undecan-1-yl)undecyl)-1-(4-(16-benzyl-1,4,10,13-tetraoxa-7,16-diazacyclooctadecan-7-yl)phenyl)benzo[*a*]imidazo[5,1,2-*cd*]indolizine-4-carboxamide (15bb)**

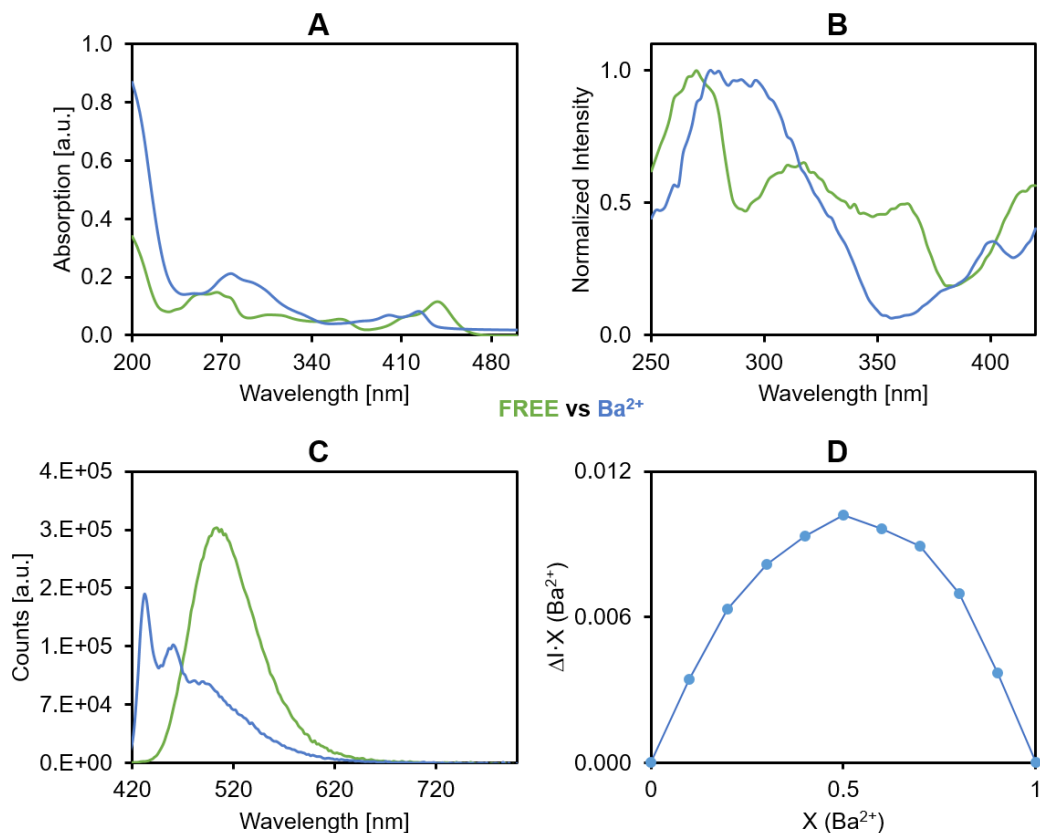

|                                                                                               |                                                                                                                    |
|-----------------------------------------------------------------------------------------------|--------------------------------------------------------------------------------------------------------------------|
| Lifetime (ns);                                                                                | $\tau_{\text{free}} = 3.25$ (100.00%); $\chi^2 = 1.1232$<br>$\tau_{\text{Ba}} = 2.91$ (100.00%); $\chi^2 = 1.1784$ |
| <b>A</b> = Absorption;                                                                        | $\lambda_{\text{free}} = 443$ nm; $\lambda_{\text{Ba}} = 428$ nm                                                   |
| <b>B</b> = Normalized excitation;                                                             | $\lambda_{\text{free}} = 316$ nm; $\lambda_{\text{Ba}} = 400$ nm                                                   |
| <b>C</b> = Emission; (exc: $\lambda_{\text{free}} = 316$ nm; $\lambda_{\text{Ba}} = 400$ nm); | $\lambda_{\text{free}} = 505$ nm; $\lambda_{\text{Ba}} = 432, 464, 496$ nm                                         |
| <b>D</b> = Job Plot;                                                                          |                                                                                                                    |

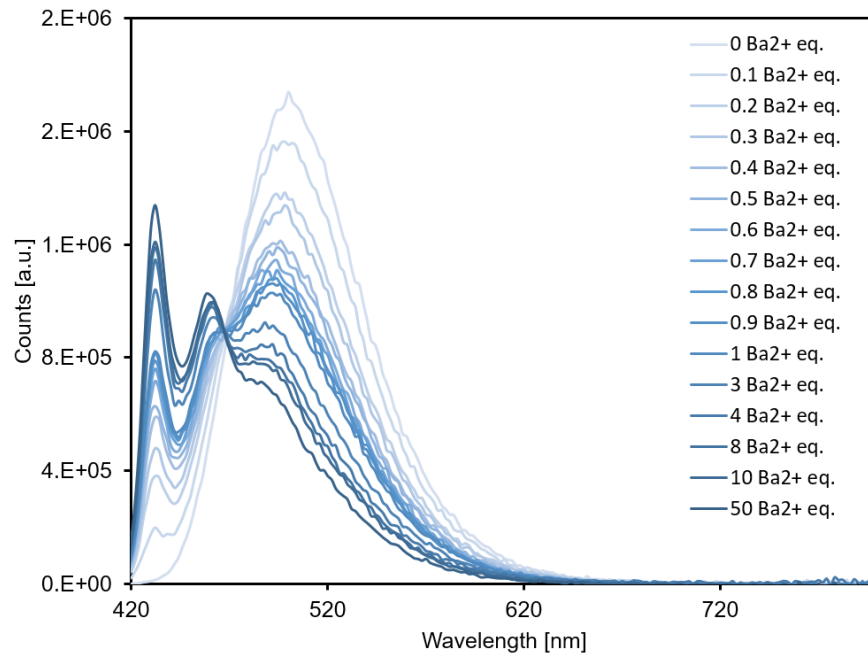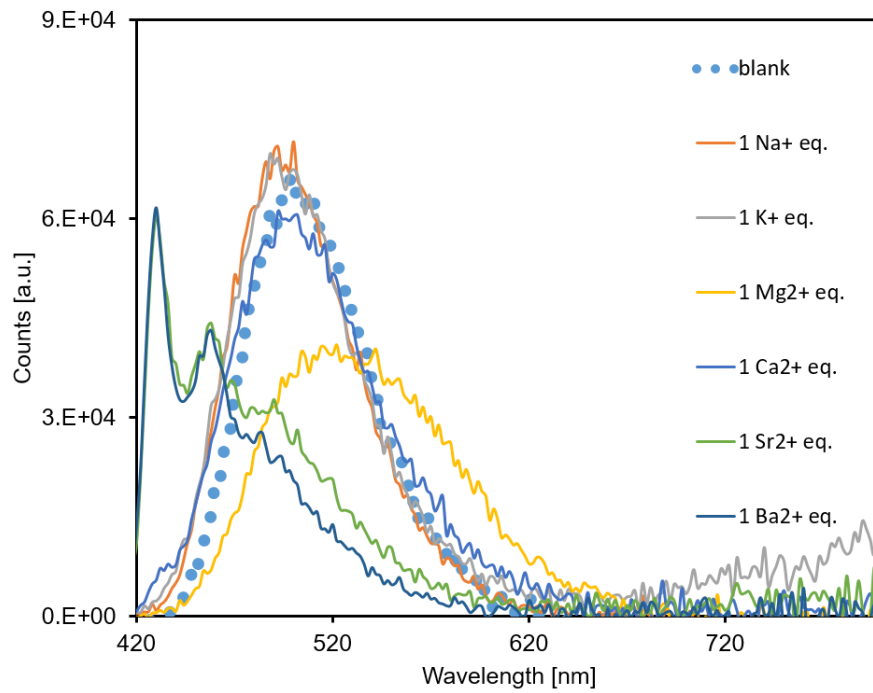

## 6. Computational data

Full ref. (34) of the main text: Gaussian 09, Revision D.01, Frisch, M. J.; Trucks, G. W.; Schlegel, H. B.; Scuseria, G. E.; Robb, M. A.; Cheeseman, J. R.; Scalmani, G.; Barone, V.; Mennucci, B.; Petersson, G. A.; Nakatsuji, H.; Caricato, M.; Li, X.; Hratchian, H. P.; Izmaylov, A. F.; Bloino, J.; Zheng, G.; Sonnenberg, J. L.; Hada, M.; Ehara, M.; Toyota, K.; Fukuda, R.; Hasegawa, J.; Ishida, M.; Nakajima, T.; Honda, Y.; Kitao, O.; Nakai, H.; Vreven, T.; Montgomery, J. A. Jr.; Peralta, J. E.; Ogliaro, F.; Bearpark, M.; Heyd, J. J.; Brothers, E.; Kudin, K. N.; Staroverov, V. N.; Kobayashi, R.; Normand, J.; Raghavachari, K.; Rendell, A.; Burant, J. C.; Iyengar, S. S.; Tomasi, J.; Cossi, M.; Rega, N.; Millam, J. M.; Klene, M.; Knox, J. E.; Cross, J. B.; Bakken, V.; Adamo, C.; Jaramillo, J.; S115 Gomperts, R.; Stratmann, R. E.; Yazyev, O.; Austin, A. J.; Cammi, R.; Pomelli, C.; Ochterski, J. W.; Martin, R. L.; Morokuma, K.; Zakrzewski, V. G.; Voth, G. A.; Salvador, P.; Dannenberg, J. J.; Dapprich, S.; Daniels, A. D.; Farkas, Ö.; Foresman, J. B.; Ortiz, J. V.; Cioslowski, J. and Fox, D. J Gaussian, Inc., Wallingford CT, 2009.

### Cartesian coordinates (in Å) 7aa' (UV/Vis)

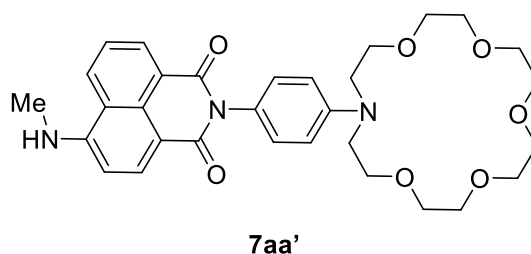

| Center Number | Atomic Number | Atomic Type | Coordinates (Angstroms) |           |           |
|---------------|---------------|-------------|-------------------------|-----------|-----------|
|               |               |             | X                       | Y         | Z         |
| 1             | 6             | 0           | 1.981323                | -0.244825 | -0.189151 |
| 2             | 6             | 0           | 1.269204                | -0.482027 | 0.980343  |
| 3             | 6             | 0           | 1.299533                | -0.167783 | -1.396882 |
| 4             | 6             | 0           | -0.108831               | -0.643964 | 0.949114  |
| 5             | 1             | 0           | 1.797147                | -0.552776 | 1.924278  |
| 6             | 6             | 0           | -0.080032               | -0.319667 | -1.442206 |
| 7             | 1             | 0           | 1.848459                | 0.026453  | -2.311033 |
| 8             | 6             | 0           | -0.829257               | -0.564113 | -0.266724 |
| 9             | 1             | 0           | -0.620870               | -0.856884 | 1.876300  |
| 10            | 1             | 0           | -0.573047               | -0.223342 | -2.398508 |
| 11            | 6             | 0           | -6.698852               | 2.834301  | 0.880630  |
| 12            | 1             | 0           | -7.203356               | 2.870055  | -0.090326 |
| 13            | 1             | 0           | -6.776561               | 3.835584  | 1.326687  |
| 14            | 6             | 0           | -7.383485               | 1.827959  | 1.789145  |
| 15            | 1             | 0           | -8.399899               | 2.176389  | 2.014440  |
| 16            | 1             | 0           | -6.833441               | 1.753661  | 2.729771  |
| 17            | 6             | 0           | -8.393093               | 0.282615  | 0.246291  |
| 18            | 1             | 0           | -8.574543               | 1.187146  | -0.346279 |
| 19            | 1             | 0           | -9.341075               | -0.003544 | 0.720653  |
| 20            | 6             | 0           | -7.925162               | -0.802667 | -0.702771 |
| 21            | 1             | 0           | -6.945662               | -0.531177 | -1.107571 |
| 22            | 1             | 0           | -8.637775               | -0.866433 | -1.533058 |
| 23            | 6             | 0           | -6.585320               | -2.710417 | -0.090627 |
| 24            | 1             | 0           | -6.118730               | -2.602795 | -1.077412 |
| 25            | 1             | 0           | -6.755602               | -3.773755 | 0.089118  |
| 26            | 6             | 0           | -5.670709               | -2.119375 | 0.972871  |
| 27            | 1             | 0           | -6.045653               | -2.360062 | 1.976848  |
| 28            | 1             | 0           | -5.669579               | -1.033140 | 0.872657  |
| 29            | 6             | 0           | -3.376950               | -1.940944 | 1.552048  |
| 30            | 1             | 0           | -2.502427               | -2.591968 | 1.602406  |

|    |   |   |           |           |           |
|----|---|---|-----------|-----------|-----------|
| 31 | 1 | 0 | -3.741939 | -1.771710 | 2.574446  |
| 32 | 6 | 0 | -3.004211 | -0.601583 | 0.913583  |
| 33 | 1 | 0 | -2.466225 | 0.004438  | 1.644180  |
| 34 | 1 | 0 | -3.905977 | -0.040717 | 0.664080  |
| 35 | 6 | 0 | -2.911608 | -0.875796 | -1.562543 |
| 36 | 1 | 0 | -3.755017 | -1.547689 | -1.396096 |
| 37 | 1 | 0 | -2.257965 | -1.370650 | -2.280954 |
| 38 | 6 | 0 | -3.442493 | 0.424330  | -2.158161 |
| 39 | 1 | 0 | -3.587831 | 0.315908  | -3.241738 |
| 40 | 1 | 0 | -2.726095 | 1.236142  | -1.987888 |
| 41 | 6 | 0 | -5.127541 | 2.067278  | -1.685031 |
| 42 | 1 | 0 | -4.718033 | 2.512658  | -2.599679 |
| 43 | 1 | 0 | -6.214037 | 2.038672  | -1.795938 |
| 44 | 6 | 0 | -4.731836 | 2.919282  | -0.485486 |
| 45 | 1 | 0 | -3.652979 | 2.858183  | -0.326835 |
| 46 | 1 | 0 | -4.987248 | 3.969727  | -0.680457 |
| 47 | 7 | 0 | -2.200522 | -0.721334 | -0.299590 |
| 48 | 8 | 0 | -4.360917 | -2.656123 | 0.800902  |
| 49 | 8 | 0 | -7.867120 | -2.087359 | -0.070501 |
| 50 | 8 | 0 | -7.404541 | 0.513476  | 1.244760  |
| 51 | 8 | 0 | -5.330469 | 2.470997  | 0.727709  |
| 52 | 8 | 0 | -4.695556 | 0.718082  | -1.538718 |
| 53 | 6 | 0 | 3.904225  | 1.224546  | 0.042636  |
| 54 | 6 | 0 | 4.211222  | -1.225613 | -0.308259 |
| 55 | 6 | 0 | 5.372707  | 1.383077  | 0.079286  |
| 56 | 6 | 0 | 5.662569  | -1.035416 | -0.237398 |
| 57 | 6 | 0 | 6.216932  | 0.249646  | -0.024087 |
| 58 | 6 | 0 | 7.632188  | 0.422522  | 0.045434  |
| 59 | 6 | 0 | 8.144423  | 1.739700  | 0.106977  |
| 60 | 6 | 0 | 5.912381  | 2.651559  | 0.195137  |
| 61 | 6 | 0 | 7.303896  | 2.831052  | 0.183202  |
| 62 | 1 | 0 | 9.213164  | 1.894617  | 0.060872  |
| 63 | 1 | 0 | 5.245796  | 3.501004  | 0.267363  |
| 64 | 1 | 0 | 7.717692  | 3.830830  | 0.221534  |
| 65 | 6 | 0 | 6.510274  | -2.121270 | -0.397319 |
| 66 | 6 | 0 | 8.476378  | -0.739982 | -0.023151 |
| 67 | 6 | 0 | 7.893530  | -1.977686 | -0.288565 |
| 68 | 1 | 0 | 6.080513  | -3.098745 | -0.575220 |
| 69 | 1 | 0 | 8.528974  | -2.852298 | -0.367847 |
| 70 | 7 | 0 | 3.413284  | -0.074497 | -0.146932 |
| 71 | 8 | 0 | 3.133563  | 2.166518  | 0.167354  |
| 72 | 8 | 0 | 3.681253  | -2.313919 | -0.493529 |
| 73 | 7 | 0 | 9.855625  | -0.630755 | 0.113620  |
| 74 | 1 | 0 | 10.310105 | -1.497739 | -0.146228 |
| 75 | 6 | 0 | 10.438032 | -0.116990 | 1.366219  |
| 76 | 1 | 0 | 10.336407 | -0.843575 | 2.180723  |
| 77 | 1 | 0 | 11.496167 | 0.088663  | 1.204083  |
| 78 | 1 | 0 | 9.952100  | 0.805092  | 1.671807  |

-----

|                                              |                             |
|----------------------------------------------|-----------------------------|
| Zero-point correction=                       | 0.649426 (Hartree/Particle) |
| Thermal correction to Energy=                | 0.687289                    |
| Thermal correction to Enthalpy=              | 0.688234                    |
| Thermal correction to Gibbs Free Energy=     | 0.574695                    |
| Sum of electronic and zero-point Energies=   | -1894.428451                |
| Sum of electronic and thermal Energies=      | -1894.390588                |
| Sum of electronic and thermal Enthalpies=    | -1894.389644                |
| Sum of electronic and thermal Free Energies= | -1894.503183                |

## Excitation energies and oscillator strengths 7aa' (UV/Vis).

Excited State 1: Singlet-A 2.6807 eV 462.50 nm f=0.0001  
<S\*\*2>=0.000  
150 -> 151 0.70355  
This state for optimization and/or second-order correction.  
Total Energy, E(TD-HF/TD-DFT) = -1893.53203998  
Copying the excited state density for this state as the 1-particle RhoCI  
density.

Excited State 2: Singlet-A 3.0956 eV 400.52 nm f=0.3669  
<S\*\*2>=0.000  
149 -> 151 0.69934

Excited State 3: Singlet-A 3.9601 eV 313.09 nm f=0.0111  
<S\*\*2>=0.000  
145 -> 151 0.56970  
149 -> 154 -0.37211

Excited State 4: Singlet-A 3.9898 eV 310.75 nm f=0.0056  
<S\*\*2>=0.000  
150 -> 152 0.61332  
150 -> 153 -0.23329  
150 -> 155 0.14991  
150 -> 156 0.11497  
150 -> 158 0.11183

Excited State 5: Singlet-A 4.0866 eV 303.39 nm f=0.0004  
<S\*\*2>=0.000  
141 -> 151 0.64595  
144 -> 151 0.15149

Excited State 6: Singlet-A 4.2020 eV 295.06 nm f=0.0342  
<S\*\*2>=0.000  
150 -> 163 0.63199  
150 -> 165 0.11550  
150 -> 166 -0.21115

Excited State 7: Singlet-A 4.2191 eV 293.87 nm f=0.0345  
<S\*\*2>=0.000  
150 -> 152 -0.11388  
150 -> 153 -0.38324  
150 -> 155 -0.15886  
150 -> 156 0.40101  
150 -> 157 0.12128  
150 -> 158 -0.27726  
150 -> 160 -0.15244

Excited State 8: Singlet-A 4.2330 eV 292.90 nm f=0.0349  
<S\*\*2>=0.000  
143 -> 151 -0.12054  
150 -> 152 -0.11122  
150 -> 153 -0.17373  
150 -> 154 0.24545  
150 -> 155 0.37542  
150 -> 156 -0.18591  
150 -> 157 -0.24171  
150 -> 158 -0.31203  
150 -> 161 -0.13638

Excited State 9: Singlet-A 4.2562 eV 291.30 nm f=0.0103  
<S\*\*2>=0.000

143 -> 151 -0.41300  
 146 -> 151 0.50133  
 147 -> 151 -0.10529  
 148 -> 151 0.15104

Excited State 10: Singlet-A 4.2933 eV 288.79 nm f=0.0006  
 <S\*\*2>=0.000

150 -> 154 0.15843  
 150 -> 155 0.25224  
 150 -> 156 -0.10905  
 150 -> 157 0.58118  
 150 -> 162 0.20093

SavETr: write IOETrn= 770 NScale= 10 NData= 16 NLR=1 NState= 10 LETran=  
 190.

### Cartesian coordinates (in Å) 7aa' (Emission)

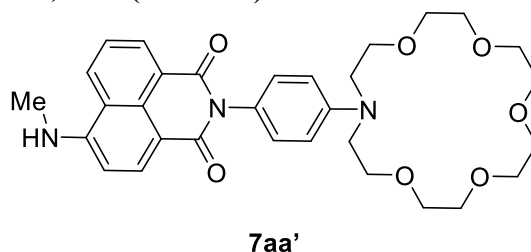

| Center Number | Atomic Number | Atomic Type | Coordinates (Angstroms) |           |           |
|---------------|---------------|-------------|-------------------------|-----------|-----------|
|               |               |             | X                       | Y         | Z         |
| 1             | 6             | 0           | -2.042453               | -0.206972 | 0.058030  |
| 2             | 6             | 0           | -1.300318               | 0.063109  | -1.101934 |
| 3             | 6             | 0           | -1.378862               | -0.640539 | 1.215614  |
| 4             | 6             | 0           | 0.056423                | -0.088459 | -1.111480 |
| 5             | 1             | 0           | -1.819229               | 0.367393  | -2.002084 |
| 6             | 6             | 0           | -0.022464               | -0.798290 | 1.222728  |
| 7             | 1             | 0           | -1.951121               | -0.819069 | 2.117071  |
| 8             | 6             | 0           | 0.745990                | -0.525429 | 0.055217  |
| 9             | 1             | 0           | 0.593433                | 0.080221  | -2.035062 |
| 10            | 1             | 0           | 0.464747                | -1.081450 | 2.146125  |
| 11            | 6             | 0           | 6.790060                | 2.817275  | 0.182576  |
| 12            | 1             | 0           | 7.299150                | 2.497462  | 1.104490  |
| 13            | 1             | 0           | 6.845509                | 3.917246  | 0.152608  |
| 14            | 6             | 0           | 7.494160                | 2.240455  | -1.019171 |
| 15            | 1             | 0           | 8.508573                | 2.663146  | -1.086088 |
| 16            | 1             | 0           | 6.954378                | 2.523933  | -1.929171 |
| 17            | 6             | 0           | 8.500652                | 0.260154  | -0.152126 |
| 18            | 1             | 0           | 8.734842                | 0.920293  | 0.697163  |
| 19            | 1             | 0           | 9.436314                | 0.098799  | -0.710443 |
| 20            | 6             | 0           | 7.988165                | -1.042821 | 0.402819  |
| 21            | 1             | 0           | 7.042381                | -0.864343 | 0.935059  |
| 22            | 1             | 0           | 8.717791                | -1.428677 | 1.128122  |
| 23            | 6             | 0           | 6.491042                | -2.504755 | -0.745648 |
| 24            | 1             | 0           | 6.054452                | -2.731994 | 0.240764  |
| 25            | 1             | 0           | 6.554144                | -3.445081 | -1.303331 |
| 26            | 6             | 0           | 5.601337                | -1.523063 | -1.473805 |
| 27            | 1             | 0           | 5.986201                | -1.333545 | -2.488296 |
| 28            | 1             | 0           | 5.599980                | -0.564372 | -0.937735 |
| 29            | 6             | 0           | 3.349088                | -1.169138 | -2.034401 |
| 30            | 1             | 0           | 2.477325                | -1.752724 | -2.349130 |
| 31            | 1             | 0           | 3.740092                | -0.639209 | -2.915912 |
| 32            | 6             | 0           | 2.930514                | -0.121025 | -1.005288 |



|    |   |   |            |           |           |
|----|---|---|------------|-----------|-----------|
| 33 | 1 | 0 | 2.408878   | 0.699665  | -1.496143 |
| 34 | 1 | 0 | 3.814016   | 0.308088  | -0.519237 |
| 35 | 6 | 0 | 2.794080   | -1.378896 | 1.125021  |
| 36 | 1 | 0 | 3.567045   | -1.988143 | 0.644278  |
| 37 | 1 | 0 | 2.106663   | -2.063104 | 1.618951  |
| 38 | 6 | 0 | 3.442574   | -0.444011 | 2.127180  |
| 39 | 1 | 0 | 3.585216   | -0.979414 | 3.077500  |
| 40 | 1 | 0 | 2.778229   | 0.412673  | 2.324590  |
| 41 | 6 | 0 | 5.203497   | 1.140925  | 2.238955  |
| 42 | 1 | 0 | 4.842762   | 1.222707  | 3.273714  |
| 43 | 1 | 0 | 6.292533   | 1.016338  | 2.286568  |
| 44 | 6 | 0 | 4.846067   | 2.385319  | 1.457892  |
| 45 | 1 | 0 | 3.761107   | 2.424892  | 1.298779  |
| 46 | 1 | 0 | 5.128128   | 3.282704  | 2.030068  |
| 47 | 7 | 0 | 2.088608   | -0.669987 | 0.055356  |
| 48 | 8 | 0 | 4.300180   | -2.077910 | -1.542159 |
| 49 | 8 | 0 | 7.803819   | -2.011004 | -0.616135 |
| 50 | 8 | 0 | 7.527543   | 0.831993  | -0.997552 |
| 51 | 8 | 0 | 5.444397   | 2.391157  | 0.179453  |
| 52 | 8 | 0 | 4.683882   | -0.019692 | 1.613652  |
| 53 | 6 | 0 | -3.929918  | 1.252350  | -0.286002 |
| 54 | 6 | 0 | -4.224993  | -1.165313 | 0.410385  |
| 55 | 6 | 0 | -5.354435  | 1.396514  | -0.291759 |
| 56 | 6 | 0 | -5.645246  | -0.959877 | 0.392320  |
| 57 | 6 | 0 | -6.192342  | 0.296932  | 0.030728  |
| 58 | 6 | 0 | -7.612776  | 0.473909  | 0.011303  |
| 59 | 6 | 0 | -8.131431  | 1.758851  | -0.270686 |
| 60 | 6 | 0 | -5.915616  | 2.653375  | -0.598004 |
| 61 | 6 | 0 | -7.287510  | 2.820679  | -0.570687 |
| 62 | 1 | 0 | -9.203103  | 1.914714  | -0.222723 |
| 63 | 1 | 0 | -5.251897  | 3.476862  | -0.836449 |
| 64 | 1 | 0 | -7.713959  | 3.797538  | -0.781638 |
| 65 | 6 | 0 | -6.497544  | -2.024689 | 0.728339  |
| 66 | 6 | 0 | -8.442500  | -0.642562 | 0.306064  |
| 67 | 6 | 0 | -7.868060  | -1.858675 | 0.672547  |
| 68 | 1 | 0 | -6.062135  | -2.977035 | 1.009511  |
| 69 | 1 | 0 | -8.524306  | -2.694732 | 0.906237  |
| 70 | 7 | 0 | -3.441549  | -0.039303 | 0.058777  |
| 71 | 8 | 0 | -3.117879  | 2.151141  | -0.525343 |
| 72 | 8 | 0 | -3.662351  | -2.230585 | 0.675347  |
| 73 | 7 | 0 | -9.847118  | -0.500632 | 0.253800  |
| 74 | 1 | 0 | -10.283934 | -1.270893 | 0.749479  |
| 75 | 6 | 0 | -10.419181 | -0.410361 | -1.088667 |
| 76 | 1 | 0 | -10.177310 | -1.286334 | -1.710106 |
| 77 | 1 | 0 | -11.506038 | -0.323816 | -1.015935 |
| 78 | 1 | 0 | -10.045168 | 0.478073  | -1.603596 |

### Excitation energies and oscillator strengths 7aa' (Emission).

Excited State 1: Singlet-A 2.0515 eV 604.35 nm f=0.0067  
 <S\*\*2>=0.000  
 150 -> 151 0.70334  
 This state for optimization and/or second-order correction.  
 Total Energy, E(TD-HF/TD-DFT) = -1893.54611630  
 Copying the excited state density for this state as the 1-particle RhoCI  
 density.

Excited State 2: Singlet-A 2.9388 eV 421.88 nm f=0.5020  
 <S\*\*2>=0.000  
 149 -> 151 -0.70082

Excited State 3: Singlet-A 3.5688 eV 347.41 nm f=0.3635  
 <S\*\*2>=0.000

|               |     |              |           |           |          |
|---------------|-----|--------------|-----------|-----------|----------|
|               |     | 150 -> 152   | -0.59544  |           |          |
|               |     | 150 -> 153   | 0.29438   |           |          |
|               |     | 150 -> 154   | 0.18015   |           |          |
| Excited State | 4:  | Singlet-A    | 3.6554 eV | 339.18 nm | f=0.0176 |
|               |     | <S**2>=0.000 |           |           |          |
|               |     | 150 -> 152   | -0.24681  |           |          |
|               |     | 150 -> 153   | -0.59979  |           |          |
|               |     | 150 -> 156   | 0.11741   |           |          |
|               |     | 150 -> 157   | -0.21982  |           |          |
| Excited State | 5:  | Singlet-A    | 3.7830 eV | 327.74 nm | f=0.0024 |
|               |     | <S**2>=0.000 |           |           |          |
|               |     | 140 -> 151   | 0.14317   |           |          |
|               |     | 141 -> 151   | -0.51215  |           |          |
|               |     | 142 -> 151   | 0.12732   |           |          |
|               |     | 143 -> 151   | 0.20413   |           |          |
|               |     | 145 -> 151   | 0.21274   |           |          |
|               |     | 146 -> 151   | 0.10906   |           |          |
|               |     | 147 -> 151   | -0.14800  |           |          |
|               |     | 148 -> 151   | -0.20156  |           |          |
| Excited State | 6:  | Singlet-A    | 3.8352 eV | 323.28 nm | f=0.0330 |
|               |     | <S**2>=0.000 |           |           |          |
|               |     | 138 -> 151   | 0.13746   |           |          |
|               |     | 144 -> 151   | 0.26663   |           |          |
|               |     | 146 -> 151   | -0.34323  |           |          |
|               |     | 147 -> 151   | -0.51692  |           |          |
| Excited State | 7:  | Singlet-A    | 3.8702 eV | 320.36 nm | f=0.0771 |
|               |     | <S**2>=0.000 |           |           |          |
|               |     | 141 -> 151   | 0.23022   |           |          |
|               |     | 142 -> 151   | -0.22528  |           |          |
|               |     | 143 -> 151   | 0.45760   |           |          |
|               |     | 144 -> 151   | -0.30718  |           |          |
|               |     | 147 -> 151   | -0.11847  |           |          |
|               |     | 149 -> 155   | 0.23561   |           |          |
| Excited State | 8:  | Singlet-A    | 3.9196 eV | 316.32 nm | f=0.0024 |
|               |     | <S**2>=0.000 |           |           |          |
|               |     | 144 -> 151   | -0.18884  |           |          |
|               |     | 146 -> 151   | -0.10062  |           |          |
|               |     | 150 -> 155   | -0.46660  |           |          |
|               |     | 150 -> 156   | -0.33870  |           |          |
|               |     | 150 -> 157   | -0.13999  |           |          |
|               |     | 150 -> 158   | 0.18112   |           |          |
|               |     | 150 -> 161   | -0.16186  |           |          |
| Excited State | 9:  | Singlet-A    | 3.9337 eV | 315.18 nm | f=0.0069 |
|               |     | <S**2>=0.000 |           |           |          |
|               |     | 141 -> 151   | 0.10076   |           |          |
|               |     | 143 -> 151   | 0.14814   |           |          |
|               |     | 144 -> 151   | 0.35321   |           |          |
|               |     | 145 -> 151   | 0.12136   |           |          |
|               |     | 146 -> 151   | 0.13156   |           |          |
|               |     | 148 -> 151   | -0.13892  |           |          |
|               |     | 150 -> 154   | 0.11364   |           |          |
|               |     | 150 -> 155   | 0.18432   |           |          |
|               |     | 150 -> 156   | -0.36096  |           |          |
|               |     | 150 -> 157   | -0.14184  |           |          |
|               |     | 150 -> 158   | 0.20235   |           |          |
|               |     | 150 -> 161   | -0.13748  |           |          |
| Excited State | 10: | Singlet-A    | 3.9483 eV | 314.02 nm | f=0.0278 |
|               |     | <S**2>=0.000 |           |           |          |
|               |     | 143 -> 151   | -0.14139  |           |          |
|               |     | 144 -> 151   | -0.32667  |           |          |
|               |     | 145 -> 151   | -0.12013  |           |          |

146 -> 151      -0.12566  
 148 -> 151      0.14154  
 150 -> 155      0.47798  
 150 -> 156      -0.17921  
 150 -> 158      0.12543

**Cartesian coordinates (in Å) 7aa'-Ba(ClO<sub>4</sub>)<sub>2</sub> (UV/Vis).**

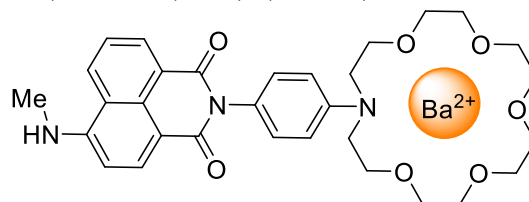

**7aa'-Ba(ClO<sub>4</sub>)<sub>2</sub>**

| Center Number | Atomic Number | Atomic Type | Coordinates (Angstroms) |           |           |
|---------------|---------------|-------------|-------------------------|-----------|-----------|
|               |               |             | X                       | Y         | Z         |
| 1             | 6             | 0           | -1.112822               | -2.690667 | -0.383232 |
| 2             | 6             | 0           | -0.515793               | -2.473141 | -1.618306 |
| 3             | 6             | 0           | -0.382446               | -3.283288 | 0.635755  |
| 4             | 6             | 0           | 0.831547                | -2.745332 | -1.803636 |
| 5             | 1             | 0           | -1.079359               | -2.000814 | -2.410830 |
| 6             | 6             | 0           | 0.960670                | -3.583583 | 0.451668  |
| 7             | 1             | 0           | -0.842316               | -3.453163 | 1.601081  |
| 8             | 6             | 0           | 1.623393                | -3.250821 | -0.749329 |
| 9             | 1             | 0           | 1.270838                | -2.492981 | -2.755557 |
| 10            | 1             | 0           | 1.499623                | -4.020398 | 1.277184  |
| 11            | 6             | 0           | 3.995581                | 2.885828  | 1.233636  |
| 12            | 1             | 0           | 4.538183                | 3.193891  | 0.330096  |
| 13            | 1             | 0           | 4.594843                | 3.179223  | 2.106031  |
| 14            | 6             | 0           | 2.644640                | 3.563819  | 1.347269  |
| 15            | 1             | 0           | 2.782744                | 4.650937  | 1.379551  |
| 16            | 1             | 0           | 2.157600                | 3.233739  | 2.264684  |
| 17            | 6             | 0           | 1.762894                | 4.013784  | -0.888186 |
| 18            | 1             | 0           | 2.030877                | 5.047761  | -0.643145 |
| 19            | 1             | 0           | 0.743211                | 3.983674  | -1.265791 |
| 20            | 6             | 0           | 2.705678                | 3.476368  | -1.952232 |
| 21            | 1             | 0           | 3.761972                | 3.615380  | -1.684395 |
| 22            | 1             | 0           | 2.514515                | 4.015098  | -2.889614 |
| 23            | 6             | 0           | 3.107493                | 1.504286  | -3.226160 |
| 24            | 1             | 0           | 4.194435                | 1.620384  | -3.106465 |
| 25            | 1             | 0           | 2.797961                | 1.997154  | -4.157028 |
| 26            | 6             | 0           | 2.721122                | 0.040625  | -3.276318 |
| 27            | 1             | 0           | 3.218787                | -0.447225 | -4.119817 |
| 28            | 1             | 0           | 1.641191                | -0.041801 | -3.401501 |
| 29            | 6             | 0           | 4.169990                | -1.514398 | -2.076688 |
| 30            | 1             | 0           | 4.767166                | -1.321136 | -1.187773 |
| 31            | 1             | 0           | 4.781397                | -1.327613 | -2.967826 |
| 32            | 6             | 0           | 3.709392                | -2.973891 | -2.070233 |
| 33            | 1             | 0           | 4.603830                | -3.598909 | -2.169124 |
| 34            | 1             | 0           | 3.095239                | -3.185879 | -2.946557 |
| 35            | 6             | 0           | 3.815486                | -3.746117 | 0.286774  |
| 36            | 1             | 0           | 4.829016                | -3.913612 | -0.081650 |
| 37            | 1             | 0           | 3.474049                | -4.701960 | 0.703918  |
| 38            | 6             | 0           | 3.879581                | -2.742227 | 1.439330  |
| 39            | 1             | 0           | 4.632419                | -3.114926 | 2.148815  |
| 40            | 1             | 0           | 2.933280                | -2.646437 | 1.973317  |
| 41            | 6             | 0           | 4.731736                | -0.620909 | 2.013309  |
| 42            | 1             | 0           | 3.994426                | -0.560862 | 2.817258  |
| 43            | 1             | 0           | 5.665506                | -1.036957 | 2.420170  |
| 44            | 6             | 0           | 5.020852                | 0.762248  | 1.488359  |
| 45            | 1             | 0           | 5.593780                | 1.295965  | 2.256195  |
| 46            | 1             | 0           | 5.627944                | 0.715370  | 0.574086  |

|    |    |   |           |           |           |
|----|----|---|-----------|-----------|-----------|
| 47 | 7  | 0 | 3.002561  | -3.384732 | -0.866772 |
| 48 | 8  | 0 | 3.070955  | -0.596817 | -2.041150 |
| 49 | 8  | 0 | 2.437425  | 2.091362  | -2.118927 |
| 50 | 8  | 0 | 1.750900  | 3.212337  | 0.294049  |
| 51 | 8  | 0 | 3.809993  | 1.473714  | 1.233308  |
| 52 | 8  | 0 | 4.264465  | -1.456302 | 0.959473  |
| 53 | 56 | 0 | 1.256374  | 0.460289  | -0.000513 |
| 54 | 6  | 0 | -2.355490 | -0.773028 | 0.345655  |
| 55 | 6  | 0 | -3.569213 | -2.820100 | -0.395203 |
| 56 | 6  | 0 | -3.619840 | -0.082364 | 0.513840  |
| 57 | 6  | 0 | -4.844522 | -2.095205 | -0.181801 |
| 58 | 6  | 0 | -4.841504 | -0.743916 | 0.243989  |
| 59 | 7  | 0 | -2.397305 | -2.096567 | -0.117231 |
| 60 | 8  | 0 | -1.266307 | -0.249544 | 0.578090  |
| 61 | 8  | 0 | -3.509408 | -3.968039 | -0.791497 |
| 62 | 6  | 0 | -6.079928 | -0.055438 | 0.396433  |
| 63 | 6  | 0 | -6.054068 | 1.336105  | 0.785749  |
| 64 | 6  | 0 | -3.629713 | 1.246310  | 0.905859  |
| 65 | 6  | 0 | -7.273680 | -0.768664 | 0.155775  |
| 66 | 6  | 0 | -6.034894 | -2.754948 | -0.425083 |
| 67 | 6  | 0 | -4.824698 | 1.948717  | 1.039557  |
| 68 | 6  | 0 | -7.255437 | -2.090452 | -0.245234 |
| 69 | 1  | 0 | -2.682294 | 1.739053  | 1.081693  |
| 70 | 1  | 0 | -4.789236 | 2.990302  | 1.324751  |
| 71 | 1  | 0 | -8.237240 | -0.293337 | 0.297932  |
| 72 | 1  | 0 | -8.186693 | -2.614842 | -0.420643 |
| 73 | 1  | 0 | -5.998302 | -3.786344 | -0.752060 |
| 74 | 7  | 0 | -7.225775 | 2.028044  | 0.912016  |
| 75 | 1  | 0 | -8.048188 | 1.619455  | 0.504734  |
| 76 | 6  | 0 | -7.281578 | 3.452188  | 1.181833  |
| 77 | 1  | 0 | -8.326408 | 3.760178  | 1.203611  |
| 78 | 1  | 0 | -6.841182 | 3.679687  | 2.156352  |
| 79 | 1  | 0 | -6.757854 | 4.039684  | 0.418069  |
| 80 | 17 | 0 | 1.165396  | 0.181215  | 3.468407  |
| 81 | 17 | 0 | -1.080843 | 1.667834  | -2.378825 |
| 82 | 8  | 0 | 2.364919  | 0.489392  | 4.286426  |
| 83 | 8  | 0 | 0.042111  | -0.270324 | 4.301496  |
| 84 | 8  | 0 | 0.776349  | 1.394665  | 2.649569  |
| 85 | 8  | 0 | 1.525359  | -0.889830 | 2.443635  |
| 86 | 8  | 0 | -0.744832 | 2.290397  | -1.042037 |
| 87 | 8  | 0 | -0.651684 | 2.570846  | -3.473640 |
| 88 | 8  | 0 | -0.278711 | 0.376401  | -2.436409 |
| 89 | 8  | 0 | -2.520665 | 1.358530  | -2.455999 |

-----

|                                              |                             |
|----------------------------------------------|-----------------------------|
| Zero-point correction=                       | 0.683640 (Hartree/Particle) |
| Thermal correction to Energy=                | 0.734729                    |
| Thermal correction to Enthalpy=              | 0.735674                    |
| Thermal correction to Gibbs Free Energy=     | 0.594183                    |
| Sum of electronic and zero-point Energies=   | -3441.892932                |
| Sum of electronic and thermal Energies=      | -3441.841843                |
| Sum of electronic and thermal Enthalpies=    | -3441.840899                |
| Sum of electronic and thermal Free Energies= | -3441.982389                |

## Excitation energies and oscillator strengths 7aa'-Ba(ClO<sub>4</sub>)<sub>2</sub> (UV/Vis)

Excited State 1: Singlet-A 3.0958 eV 400.49 nm f=0.0001  
<S\*\*2>=0.000  
204 -> 205 0.70302  
This state for optimization and/or second-order correction.  
Total Energy, E(TD-HF/TD-DFT) = -3440.62265189  
Copying the excited state density for this state as the 1-particle RhoCI density.

Excited State 2: Singlet-A 3.1357 eV 395.39 nm f=0.2715  
<S\*\*2>=0.000  
203 -> 205 0.69660

Excited State 3: Singlet-A 3.7647 eV 329.33 nm f=0.0192  
<S\*\*2>=0.000  
204 -> 206 0.66761  
204 -> 208 0.21565

Excited State 4: Singlet-A 3.9848 eV 311.14 nm f=0.0005  
<S\*\*2>=0.000  
201 -> 205 -0.15605  
203 -> 207 0.66474  
203 -> 215 -0.12625

Excited State 5: Singlet-A 4.0100 eV 309.19 nm f=0.0018  
<S\*\*2>=0.000  
201 -> 205 0.50953  
203 -> 207 0.20570  
203 -> 215 0.39579  
203 -> 216 0.14597

Excited State 6: Singlet-A 4.0291 eV 307.72 nm f=0.0114  
<S\*\*2>=0.000  
204 -> 206 -0.22201  
204 -> 208 0.58868  
204 -> 209 0.10257  
204 -> 210 -0.27725

Excited State 7: Singlet-A 4.0709 eV 304.56 nm f=0.0002  
<S\*\*2>=0.000  
197 -> 205 0.13080  
200 -> 205 0.65064  
200 -> 235 -0.10367

Excited State 8: Singlet-A 4.1132 eV 301.43 nm f=0.0063  
<S\*\*2>=0.000  
204 -> 208 -0.10052  
204 -> 209 0.67173  
204 -> 212 -0.17559

Excited State 9: Singlet-A 4.1454 eV 299.09 nm f=0.0000  
<S\*\*2>=0.000  
203 -> 206 0.70574

Excited State 10: Singlet-A 4.2495 eV 291.76 nm f=0.0005  
<S\*\*2>=0.000  
204 -> 207 0.69265  
204 -> 210 -0.10899

**Cartesian coordinates (in Å) 7aa'-Ba(ClO<sub>4</sub>)<sub>2</sub> (Emission)**

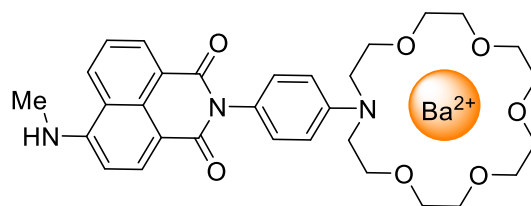

**7aa'-Ba(ClO<sub>4</sub>)<sub>2</sub>**

| Center Number | Atomic Number | Atomic Type | Coordinates (Angstroms) |           |           |
|---------------|---------------|-------------|-------------------------|-----------|-----------|
|               |               |             | X                       | Y         | Z         |
| 1             | 6             | 0           | 0.834267                | 2.576876  | 0.603132  |
| 2             | 6             | 0           | 0.409172                | 2.975984  | -0.659061 |
| 3             | 6             | 0           | -0.066441               | 2.577956  | 1.654270  |
| 4             | 6             | 0           | -0.923364               | 3.261521  | -0.888584 |
| 5             | 1             | 0           | 1.120181                | 3.004570  | -1.473788 |
| 6             | 6             | 0           | -1.406807               | 2.876651  | 1.434430  |
| 7             | 1             | 0           | 0.255678                | 2.277698  | 2.644022  |
| 8             | 6             | 0           | -1.882750               | 3.162491  | 0.141116  |
| 9             | 1             | 0           | -1.211043               | 3.532635  | -1.893094 |
| 10            | 1             | 0           | -2.073443               | 2.841328  | 2.280848  |
| 11            | 6             | 0           | -3.620992               | -3.276519 | -0.278716 |
| 12            | 1             | 0           | -3.929460               | -3.314999 | -1.332525 |
| 13            | 1             | 0           | -4.329419               | -3.871275 | 0.311745  |
| 14            | 6             | 0           | -2.234260               | -3.840548 | -0.075541 |
| 15            | 1             | 0           | -2.204852               | -4.881525 | -0.416456 |
| 16            | 1             | 0           | -1.986045               | -3.800540 | 0.984422  |
| 17            | 6             | 0           | -0.945987               | -3.432840 | -2.081353 |
| 18            | 1             | 0           | -1.194098               | -4.485465 | -2.257988 |
| 19            | 1             | 0           | 0.125421                | -3.294133 | -2.200007 |
| 20            | 6             | 0           | -1.675626               | -2.569617 | -3.097274 |
| 21            | 1             | 0           | -2.732739               | -2.848779 | -3.201995 |
| 22            | 1             | 0           | -1.182695               | -2.693958 | -4.069531 |
| 23            | 6             | 0           | -1.990695               | -0.319974 | -3.710617 |
| 24            | 1             | 0           | -2.988706               | -0.598336 | -4.077483 |
| 25            | 1             | 0           | -1.270842               | -0.365907 | -4.537017 |
| 26            | 6             | 0           | -2.010514               | 1.074691  | -3.124131 |
| 27            | 1             | 0           | -2.360342               | 1.790936  | -3.874692 |
| 28            | 1             | 0           | -0.998165               | 1.350294  | -2.821135 |
| 29            | 6             | 0           | -4.004378               | 1.916243  | -2.026388 |
| 30            | 1             | 0           | -4.762659               | 1.421554  | -1.423083 |
| 31            | 1             | 0           | -4.364535               | 1.993148  | -3.060241 |
| 32            | 6             | 0           | -3.748928               | 3.317536  | -1.465980 |
| 33            | 1             | 0           | -4.700042               | 3.857827  | -1.480117 |
| 34            | 1             | 0           | -3.081521               | 3.878665  | -2.121115 |
| 35            | 6             | 0           | -4.198937               | 3.265477  | 0.977693  |
| 36            | 1             | 0           | -5.156262               | 3.577488  | 0.557039  |
| 37            | 1             | 0           | -3.937916               | 4.001669  | 1.747687  |
| 38            | 6             | 0           | -4.398044               | 1.911803  | 1.675792  |
| 39            | 1             | 0           | -5.386954               | 1.943536  | 2.153362  |
| 40            | 1             | 0           | -3.665219               | 1.709786  | 2.458507  |
| 41            | 6             | 0           | -5.028338               | -0.288186 | 1.230630  |
| 42            | 1             | 0           | -4.588152               | -0.613831 | 2.177818  |
| 43            | 1             | 0           | -6.088066               | -0.043994 | 1.391094  |
| 44            | 6             | 0           | -4.946500               | -1.404292 | 0.225405  |
| 45            | 1             | 0           | -5.642366               | -2.189358 | 0.543308  |
| 46            | 1             | 0           | -5.244771               | -1.055812 | -0.772673 |
| 47            | 7             | 0           | -3.236523               | 3.332146  | -0.107344 |
| 48            | 8             | 0           | -2.853238               | 1.085518  | -1.974294 |
| 49            | 8             | 0           | -1.597990               | -1.216540 | -2.688503 |
| 50            | 8             | 0           | -1.249004               | -3.071291 | -0.742052 |

|    |    |   |           |           |           |
|----|----|---|-----------|-----------|-----------|
| 51 | 8  | 0 | -3.632332 | -1.933785 | 0.176310  |
| 52 | 8  | 0 | -4.356940 | 0.856222  | 0.733685  |
| 53 | 56 | 0 | -1.202070 | -0.306300 | -0.032564 |
| 54 | 6  | 0 | 2.181003  | 0.665784  | 1.018415  |
| 55 | 6  | 0 | 3.281105  | 2.819995  | 0.428682  |
| 56 | 6  | 0 | 3.490158  | 0.003740  | 0.940097  |
| 57 | 6  | 0 | 4.557482  | 2.144392  | 0.405437  |
| 58 | 6  | 0 | 4.651387  | 0.753117  | 0.620279  |
| 59 | 7  | 0 | 2.141772  | 2.012427  | 0.755485  |
| 60 | 8  | 0 | 1.165045  | 0.019575  | 1.275599  |
| 61 | 8  | 0 | 3.110420  | 4.002988  | 0.193648  |
| 62 | 6  | 0 | 5.901521  | 0.097902  | 0.521769  |
| 63 | 6  | 0 | 5.905136  | -1.334605 | 0.656792  |
| 64 | 6  | 0 | 3.523896  | -1.397467 | 1.131253  |
| 65 | 6  | 0 | 7.061499  | 0.858154  | 0.259538  |
| 66 | 6  | 0 | 5.733656  | 2.888329  | 0.118512  |
| 67 | 6  | 0 | 4.713425  | -2.055238 | 0.992250  |
| 68 | 6  | 0 | 6.950435  | 2.249040  | 0.061525  |
| 69 | 1  | 0 | 2.597791  | -1.911179 | 1.351910  |
| 70 | 1  | 0 | 4.756057  | -3.130208 | 1.104557  |
| 71 | 1  | 0 | 8.048558  | 0.414082  | 0.241635  |
| 72 | 1  | 0 | 7.847439  | 2.821655  | -0.143036 |
| 73 | 1  | 0 | 5.640047  | 3.953337  | -0.047712 |
| 74 | 7  | 0 | 7.048579  | -2.006488 | 0.443261  |
| 75 | 1  | 0 | 7.833784  | -1.473670 | 0.102347  |
| 76 | 6  | 0 | 7.195397  | -3.448359 | 0.498268  |
| 77 | 1  | 0 | 8.231001  | -3.696380 | 0.277539  |
| 78 | 1  | 0 | 6.952154  | -3.824004 | 1.494673  |
| 79 | 1  | 0 | 6.550497  | -3.938727 | -0.236265 |
| 80 | 17 | 0 | -1.894138 | -1.420393 | 3.154277  |
| 81 | 17 | 0 | 1.631997  | -0.735204 | -2.144954 |
| 82 | 8  | 0 | -3.136019 | -2.169974 | 3.355173  |
| 83 | 8  | 0 | -1.161144 | -1.263739 | 4.394963  |
| 84 | 8  | 0 | -1.057503 | -2.097651 | 2.123537  |
| 85 | 8  | 0 | -2.220432 | -0.074905 | 2.571559  |
| 86 | 8  | 0 | 1.177032  | -1.684070 | -1.096330 |
| 87 | 8  | 0 | 1.302528  | -1.263614 | -3.472343 |
| 88 | 8  | 0 | 0.870425  | 0.529038  | -1.897381 |
| 89 | 8  | 0 | 3.061073  | -0.478642 | -2.013957 |

### Excitation energies and oscillator strengths 7aa'-Ba(ClO<sub>4</sub>)<sub>2</sub> (Emission)

|               |    |                                                                                   |              |           |          |
|---------------|----|-----------------------------------------------------------------------------------|--------------|-----------|----------|
| Excited State | 1: | Singlet-A                                                                         | 2.9396 eV    | 421.77 nm | f=0.2606 |
|               |    |                                                                                   | <S**2>=0.000 |           |          |
|               |    | 204 -> 205                                                                        | -0.69706     |           |          |
|               |    | This state for optimization and/or second-order correction.                       |              |           |          |
|               |    | Total Energy, E(TD-HF/TD-DFT) = -3441.14410968                                    |              |           |          |
|               |    | Copying the excited state density for this state as the 1-particle RhoCI density. |              |           |          |
| Excited State | 2: | Singlet-A                                                                         | 3.8886 eV    | 318.84 nm | f=0.0150 |
|               |    |                                                                                   | <S**2>=0.000 |           |          |
|               |    | 199 -> 205                                                                        | 0.10721      |           |          |
|               |    | 203 -> 205                                                                        | -0.66578     |           |          |
| Excited State | 3: | Singlet-A                                                                         | 4.1967 eV    | 295.43 nm | f=0.0021 |
|               |    |                                                                                   | <S**2>=0.000 |           |          |
|               |    | 201 -> 205                                                                        | -0.31203     |           |          |
|               |    | 202 -> 205                                                                        | 0.35014      |           |          |
|               |    | 204 -> 215                                                                        | 0.45035      |           |          |
|               |    | 204 -> 216                                                                        | 0.17666      |           |          |
| Excited State | 4: | Singlet-A                                                                         | 4.3778 eV    | 283.21 nm | f=0.0002 |
|               |    |                                                                                   | <S**2>=0.000 |           |          |
|               |    | 187 -> 205                                                                        | -0.12746     |           |          |

```

189 -> 205      0.21634
190 -> 205     -0.12903
191 -> 205     -0.15257
196 -> 205     -0.10445
198 -> 205     -0.43298
198 -> 234     -0.12271
199 -> 205      0.20575
203 -> 205      0.10369

```

```

Excited State  5:      Singlet-A      4.5784 eV  270.80 nm  f=0.0134
                   <S**2>=0.000
204 -> 207     -0.65868

```

### Cartesian coordinates (in Å) 14a (UV/Vis)

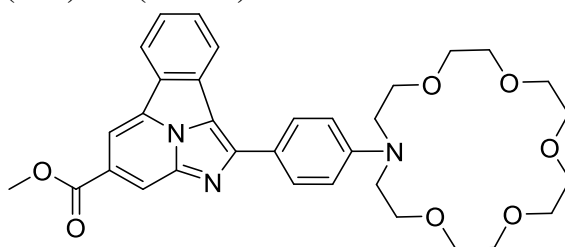

**14a**

| Center Number | Atomic Number | Atomic Type | Coordinates (Angstroms) |           |           |
|---------------|---------------|-------------|-------------------------|-----------|-----------|
|               |               |             | X                       | Y         | Z         |
| 1             | 6             | 0           | -1.670601               | -0.277856 | -0.340993 |
| 2             | 6             | 0           | -0.937972               | 0.762678  | 0.250155  |
| 3             | 6             | 0           | -0.943248               | -1.257489 | -1.037027 |
| 4             | 6             | 0           | 0.439523                | 0.840017  | 0.143243  |
| 5             | 1             | 0           | -1.451792               | 1.520082  | 0.827902  |
| 6             | 6             | 0           | 0.433292                | -1.194834 | -1.154329 |
| 7             | 1             | 0           | -1.477029               | -2.083558 | -1.489820 |
| 8             | 6             | 0           | 1.176377                | -0.135975 | -0.572649 |
| 9             | 1             | 0           | 0.942780                | 1.675535  | 0.607648  |
| 10            | 1             | 0           | 0.937314                | -1.988619 | -1.686491 |
| 11            | 6             | 0           | 7.227887                | -1.300849 | 2.702754  |
| 12            | 1             | 0           | 7.721928                | -2.069992 | -2.100645 |
| 13            | 1             | 0           | 7.357031                | -1.578490 | 3.757965  |
| 14            | 6             | 0           | 7.875639                | 0.051127  | 2.458460  |
| 15            | 1             | 0           | 8.909963                | 0.028975  | 2.826035  |
| 16            | 1             | 0           | 7.334059                | 0.819826  | 3.014030  |
| 17            | 6             | 0           | 8.793775                | -0.162827 | 0.246055  |
| 18            | 1             | 0           | 8.993936                | -1.195776 | 0.555515  |
| 19            | 1             | 0           | 9.739987                | 0.392025  | 0.297126  |
| 20            | 6             | 0           | 8.275218                | -0.200494 | -1.177424 |
| 21            | 1             | 0           | 7.304038                | -0.703828 | -1.195298 |
| 22            | 1             | 0           | 8.977780                | -0.779998 | -1.787260 |
| 23            | 6             | 0           | 6.866120                | 1.466022  | -2.197967 |
| 24            | 1             | 0           | 6.410589                | 0.637572  | -2.754252 |
| 25            | 1             | 0           | 6.995396                | 2.304474  | -2.885121 |
| 26            | 6             | 0           | 5.965776                | 1.854537  | -1.033628 |
| 27            | 1             | 0           | 6.331217                | 2.774382  | -0.557922 |
| 28            | 1             | 0           | 5.992188                | 1.061285  | -0.285050 |
| 29            | 6             | 0           | 3.678069                | 2.170219  | -0.482793 |
| 30            | 1             | 0           | 2.788846                | 2.609185  | -0.938583 |
| 31            | 1             | 0           | 4.047032                | 2.858890  | 0.289570  |
| 32            | 6             | 0           | 3.335068                | 0.824689  | 0.159894  |
| 33            | 1             | 0           | 2.799358                | 1.000571  | 1.093530  |
| 34            | 1             | 0           | 4.247953                | 0.293366  | 0.430989  |
| 35            | 6             | 0           | 3.273993                | -0.912440 | -1.625646 |



|    |   |   |            |           |           |
|----|---|---|------------|-----------|-----------|
| 36 | 1 | 0 | 4.087908   | -0.324547 | -2.052337 |
| 37 | 1 | 0 | 2.617092   | -1.179318 | -2.452377 |
| 38 | 6 | 0 | 3.862865   | -2.174272 | -1.005143 |
| 39 | 1 | 0 | 4.032879   | -2.933250 | -1.780820 |
| 40 | 1 | 0 | 3.169388   | -2.589218 | -0.264567 |
| 41 | 6 | 0 | 5.609808   | -2.799889 | 0.518173  |
| 42 | 1 | 0 | 5.222865   | -3.798008 | 0.281000  |
| 43 | 1 | 0 | 6.693366   | -2.830840 | 0.381214  |
| 44 | 6 | 0 | 5.260105   | -2.450928 | 1.959254  |
| 45 | 1 | 0 | 4.180094   | -2.320861 | 2.057193  |
| 46 | 1 | 0 | 5.564437   | -3.273822 | 2.620168  |
| 47 | 7 | 0 | 2.544214   | -0.060686 | -0.691740 |
| 48 | 8 | 0 | 4.643620   | 2.055227  | -1.529427 |
| 49 | 8 | 0 | 8.169879   | 1.110604  | -1.745822 |
| 50 | 8 | 0 | 7.828351   | 0.449989  | 1.093594  |
| 51 | 8 | 0 | 5.841749   | -1.221082 | 2.384315  |
| 52 | 8 | 0 | 5.107398   | -1.829591 | -0.396154 |
| 53 | 6 | 0 | -5.108171  | -1.271110 | -0.254755 |
| 54 | 6 | 0 | -4.034806  | 0.691823  | 0.090325  |
| 55 | 7 | 0 | -5.236493  | 0.053212  | 0.069342  |
| 56 | 6 | 0 | -6.351043  | 0.811353  | 0.295644  |
| 57 | 6 | 0 | -7.544926  | 0.120539  | 0.233453  |
| 58 | 6 | 0 | -7.506431  | -1.268067 | -0.066857 |
| 59 | 6 | 0 | -6.314110  | -1.969810 | -0.316753 |
| 60 | 1 | 0 | -8.489879  | 0.614340  | 0.398206  |
| 61 | 1 | 0 | -6.345826  | -3.022214 | -0.558109 |
| 62 | 6 | 0 | -4.374543  | 2.074665  | 0.361797  |
| 63 | 6 | 0 | -5.812009  | 2.144721  | 0.500818  |
| 64 | 6 | 0 | -3.620418  | 3.248193  | 0.480657  |
| 65 | 6 | 0 | -6.444918  | 3.359937  | 0.768407  |
| 66 | 6 | 0 | -5.669674  | 4.505480  | 0.890868  |
| 67 | 6 | 0 | -4.273375  | 4.446103  | 0.742678  |
| 68 | 1 | 0 | -3.692174  | 5.356189  | 0.833131  |
| 69 | 1 | 0 | -7.522289  | 3.406775  | 0.873736  |
| 70 | 1 | 0 | -2.545652  | 3.234851  | 0.360395  |
| 71 | 7 | 0 | -3.792865  | -1.531069 | -0.436535 |
| 72 | 6 | 0 | -3.117366  | -0.355285 | -0.229171 |
| 73 | 1 | 0 | -6.144572  | 5.456839  | 1.097333  |
| 74 | 6 | 0 | -8.768937  | -2.052732 | -0.143995 |
| 75 | 8 | 0 | -8.823649  | -3.240447 | -0.397520 |
| 76 | 8 | 0 | -9.856863  | -1.304414 | 0.098234  |
| 77 | 6 | 0 | -11.129420 | -1.982109 | 0.043131  |
| 78 | 1 | 0 | -11.871388 | -1.218329 | 0.259622  |
| 79 | 1 | 0 | -11.289624 | -2.402410 | -0.949619 |
| 80 | 1 | 0 | -11.166356 | -2.775405 | 0.789620  |

### Excitation energies and oscillator strengths 14a (UV/Vis).

Excited State 1: Singlet-A 2.8755 eV 431.17 nm f=0.7337  
 <S\*\*2>=0.000  
 155 -> 157 -0.11179  
 156 -> 157 0.68352  
 This state for optimization and/or second-order correction.  
 Total Energy, E(TD-HF/TD-DFT) = -1969.67149045  
 Copying the excited state density for this state as the 1-particle RhoCI density.

Excited State 2: Singlet-A 3.2947 eV 376.31 nm f=0.0602  
 <S\*\*2>=0.000  
 155 -> 157 0.20380  
 156 -> 158 0.66111

Excited State 3: Singlet-A 3.5496 eV 349.29 nm f=0.0912  
 <S\*\*2>=0.000  
 154 -> 158 -0.10052  
 155 -> 157 0.62598

|               |     |              |           |           |          |
|---------------|-----|--------------|-----------|-----------|----------|
|               |     | 155 -> 158   | 0.13174   |           |          |
|               |     | 156 -> 157   | 0.14685   |           |          |
|               |     | 156 -> 158   | -0.18566  |           |          |
| Excited State | 4:  | Singlet-A    | 3.8314 eV | 323.60 nm | f=0.2746 |
|               |     | <S**2>=0.000 |           |           |          |
|               |     | 154 -> 157   | 0.27174   |           |          |
|               |     | 155 -> 157   | -0.13656  |           |          |
|               |     | 155 -> 158   | 0.43641   |           |          |
|               |     | 156 -> 159   | -0.32085  |           |          |
|               |     | 156 -> 160   | -0.23078  |           |          |
|               |     | 156 -> 161   | 0.16674   |           |          |
| Excited State | 5:  | Singlet-A    | 3.8384 eV | 323.01 nm | f=0.0644 |
|               |     | <S**2>=0.000 |           |           |          |
|               |     | 154 -> 157   | 0.17508   |           |          |
|               |     | 155 -> 158   | 0.26853   |           |          |
|               |     | 156 -> 159   | 0.56008   |           |          |
|               |     | 156 -> 160   | -0.11120  |           |          |
|               |     | 156 -> 163   | 0.17017   |           |          |
| Excited State | 6:  | Singlet-A    | 3.9021 eV | 317.74 nm | f=0.0870 |
|               |     | <S**2>=0.000 |           |           |          |
|               |     | 154 -> 157   | 0.19887   |           |          |
|               |     | 155 -> 158   | 0.19236   |           |          |
|               |     | 156 -> 160   | 0.55354   |           |          |
|               |     | 156 -> 161   | -0.22790  |           |          |
|               |     | 156 -> 162   | 0.14289   |           |          |
| Excited State | 7:  | Singlet-A    | 4.0755 eV | 304.22 nm | f=0.0233 |
|               |     | <S**2>=0.000 |           |           |          |
|               |     | 151 -> 157   | -0.12058  |           |          |
|               |     | 156 -> 161   | 0.14169   |           |          |
|               |     | 156 -> 162   | 0.35561   |           |          |
|               |     | 156 -> 163   | 0.19986   |           |          |
|               |     | 156 -> 164   | -0.10603  |           |          |
|               |     | 156 -> 166   | 0.21625   |           |          |
|               |     | 156 -> 168   | -0.24052  |           |          |
|               |     | 156 -> 169   | -0.34279  |           |          |
|               |     | 156 -> 172   | 0.13117   |           |          |
| Excited State | 8:  | Singlet-A    | 4.1041 eV | 302.10 nm | f=0.0149 |
|               |     | <S**2>=0.000 |           |           |          |
|               |     | 156 -> 160   | -0.15558  |           |          |
|               |     | 156 -> 161   | -0.24484  |           |          |
|               |     | 156 -> 162   | 0.43185   |           |          |
|               |     | 156 -> 163   | 0.20193   |           |          |
|               |     | 156 -> 164   | -0.11500  |           |          |
|               |     | 156 -> 166   | -0.19500  |           |          |
|               |     | 156 -> 167   | 0.13863   |           |          |
|               |     | 156 -> 168   | 0.14844   |           |          |
|               |     | 156 -> 169   | 0.24089   |           |          |
| Excited State | 9:  | Singlet-A    | 4.1489 eV | 298.83 nm | f=0.0034 |
|               |     | <S**2>=0.000 |           |           |          |
|               |     | 156 -> 159   | 0.15331   |           |          |
|               |     | 156 -> 160   | 0.22656   |           |          |
|               |     | 156 -> 161   | 0.53788   |           |          |
|               |     | 156 -> 162   | 0.17555   |           |          |
|               |     | 156 -> 167   | 0.11380   |           |          |
|               |     | 156 -> 168   | 0.11423   |           |          |
|               |     | 156 -> 169   | 0.20484   |           |          |
| Excited State | 10: | Singlet-A    | 4.1990 eV | 295.27 nm | f=0.0007 |
|               |     | <S**2>=0.000 |           |           |          |
|               |     | 156 -> 163   | 0.19540   |           |          |
|               |     | 156 -> 164   | 0.59063   |           |          |
|               |     | 156 -> 165   | 0.15746   |           |          |

156 -> 168      0.23386  
 156 -> 169      -0.13004

**Cartesian coordinates (in Å) 14a (Emission)**

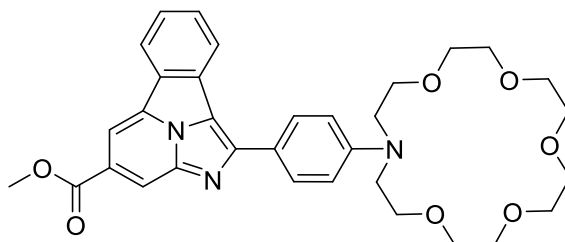

**14a**

| Center Number | Atomic Number | Atomic Type | Coordinates (Angstroms) |           |           |
|---------------|---------------|-------------|-------------------------|-----------|-----------|
|               |               |             | X                       | Y         | Z         |
| 1             | 6             | 0           | -1.707729               | -0.321635 | -0.328436 |
| 2             | 6             | 0           | -0.955743               | 0.841748  | -0.041755 |
| 3             | 6             | 0           | -0.978983               | -1.477836 | -0.708976 |
| 4             | 6             | 0           | 0.408738                | 0.865065  | -0.141772 |
| 5             | 1             | 0           | -1.469561               | 1.740591  | 0.276319  |
| 6             | 6             | 0           | 0.384231                | -1.462554 | -0.821807 |
| 7             | 1             | 0           | -1.529100               | -2.391236 | -0.905388 |
| 8             | 6             | 0           | 1.134472                | -0.286538 | -0.548284 |
| 9             | 1             | 0           | 0.927337                | 1.792665  | 0.067459  |
| 10            | 1             | 0           | 0.892152                | -2.381154 | -1.090909 |
| 11            | 6             | 0           | 7.244193                | -0.483064 | 2.854946  |
| 12            | 1             | 0           | 7.747041                | -1.394799 | 2.499177  |
| 13            | 1             | 0           | 7.330314                | -0.479439 | 3.953414  |
| 14            | 6             | 0           | 7.927989                | 0.734820  | 2.287086  |
| 15            | 1             | 0           | 8.956832                | 0.792959  | 2.675081  |
| 16            | 1             | 0           | 7.397252                | 1.635943  | 2.613127  |
| 17            | 6             | 0           | 8.879438                | -0.061488 | 0.253113  |
| 18            | 1             | 0           | 9.100825                | -0.960369 | 0.849826  |
| 19            | 1             | 0           | 9.822553                | 0.496646  | 0.138069  |
| 20            | 6             | 0           | 8.365016                | -0.513805 | -1.088043 |
| 21            | 1             | 0           | 7.418772                | -1.056085 | -0.947104 |
| 22            | 1             | 0           | 9.092412                | -1.209887 | -1.528413 |
| 23            | 6             | 0           | 6.872751                | 0.733500  | -2.471142 |
| 24            | 1             | 0           | 6.455048                | -0.233646 | -2.796149 |
| 25            | 1             | 0           | 6.939808                | 1.375725  | -3.355657 |
| 26            | 6             | 0           | 5.959009                | 1.355858  | -1.439615 |
| 27            | 1             | 0           | 6.322981                | 2.358021  | -1.160506 |
| 28            | 1             | 0           | 5.962429                | 0.740007  | -0.530124 |
| 29            | 6             | 0           | 3.700363                | 1.880984  | -1.066228 |
| 30            | 1             | 0           | 2.826890                | 2.207054  | -1.641315 |
| 31            | 1             | 0           | 4.080232                | 2.748141  | -0.502640 |
| 32            | 6             | 0           | 3.294492                | 0.798947  | -0.071156 |
| 33            | 1             | 0           | 2.746236                | 1.251255  | 0.757690  |
| 34            | 1             | 0           | 4.186544                | 0.333069  | 0.364483  |
| 35            | 6             | 0           | 3.221899                | -1.317246 | -1.357029 |
| 36            | 1             | 0           | 4.006428                | -0.836332 | -1.953257 |
| 37            | 1             | 0           | 2.552410                | -1.814412 | -2.059514 |
| 38            | 6             | 0           | 3.866128                | -2.329689 | -0.430145 |
| 39            | 1             | 0           | 4.013813                | -3.281080 | -0.964836 |
| 40            | 1             | 0           | 3.202091                | -2.528234 | 0.426811  |
| 41            | 6             | 0           | 5.649756                | -2.479974 | 1.125721  |
| 42            | 1             | 0           | 5.301554                | -3.521763 | 1.173210  |
| 43            | 1             | 0           | 6.738160                | -2.510721 | 0.987204  |
| 44            | 6             | 0           | 5.299865                | -1.754851 | 2.406250  |

|    |   |   |            |           |           |
|----|---|---|------------|-----------|-----------|
| 45 | 1 | 0 | 4.214495   | -1.604685 | 2.461136  |
| 46 | 1 | 0 | 5.594096   | -2.363871 | 3.275408  |
| 47 | 7 | 0 | 2.492338   | -0.264339 | -0.660888 |
| 48 | 8 | 0 | 4.662590   | 1.445241  | -1.997658 |
| 49 | 8 | 0 | 8.182102   | 0.577361  | -1.974411 |
| 50 | 8 | 0 | 7.911032   | 0.748748  | 0.878636  |
| 51 | 8 | 0 | 5.888010   | -0.473012 | 2.465491  |
| 52 | 8 | 0 | 5.110065   | -1.818658 | -0.002225 |
| 53 | 6 | 0 | -5.111643  | -1.262349 | -0.223416 |
| 54 | 6 | 0 | -4.046162  | 0.712842  | 0.026961  |
| 55 | 7 | 0 | -5.241615  | 0.074158  | 0.022749  |
| 56 | 6 | 0 | -6.356786  | 0.855452  | 0.231459  |
| 57 | 6 | 0 | -7.554694  | 0.154962  | 0.208473  |
| 58 | 6 | 0 | -7.519399  | -1.237739 | -0.025391 |
| 59 | 6 | 0 | -6.336517  | -1.970661 | -0.243147 |
| 60 | 1 | 0 | -8.500512  | 0.657971  | 0.362073  |
| 61 | 1 | 0 | -6.373880  | -3.036489 | -0.422488 |
| 62 | 6 | 0 | -4.382278  | 2.102372  | 0.256768  |
| 63 | 6 | 0 | -5.823769  | 2.168758  | 0.388850  |
| 64 | 6 | 0 | -3.639003  | 3.278188  | 0.346873  |
| 65 | 6 | 0 | -6.451731  | 3.397121  | 0.620925  |
| 66 | 6 | 0 | -5.679985  | 4.539485  | 0.713155  |
| 67 | 6 | 0 | -4.284470  | 4.484939  | 0.574429  |
| 68 | 1 | 0 | -3.701953  | 5.397616  | 0.643805  |
| 69 | 1 | 0 | -7.532214  | 3.447768  | 0.722982  |
| 70 | 1 | 0 | -2.560501  | 3.275770  | 0.232332  |
| 71 | 7 | 0 | -3.824616  | -1.549568 | -0.385458 |
| 72 | 6 | 0 | -3.127259  | -0.357059 | -0.230582 |
| 73 | 1 | 0 | -6.160012  | 5.496964  | 0.891771  |
| 74 | 6 | 0 | -8.784039  | -2.006002 | -0.053976 |
| 75 | 8 | 0 | -8.855063  | -3.199061 | -0.252801 |
| 76 | 8 | 0 | -9.865735  | -1.245394 | 0.165529  |
| 77 | 6 | 0 | -11.121169 | -1.919131 | 0.152113  |
| 78 | 1 | 0 | -11.873692 | -1.156170 | 0.343642  |
| 79 | 1 | 0 | -11.298899 | -2.386384 | -0.819438 |
| 80 | 1 | 0 | -11.157012 | -2.685483 | 0.930083  |

-----

### Excitation energies and oscillator strengths 14a (Emission)

Excited State 1: Singlet-A 2.5926 eV 478.23 nm f=1.0962  
 <S\*\*2>=0.000  
 156 -> 157 -0.69325  
 This state for optimization and/or second-order correction.  
 Total Energy, E(TD-HF/TD-DFT) = -1969.68137978  
 Copying the excited state density for this state as the 1-particle RhoCI density.

Excited State 2: Singlet-A 3.1928 eV 388.33 nm f=0.0798  
 <S\*\*2>=0.000  
 155 -> 157 0.19409  
 156 -> 158 -0.66664

Excited State 3: Singlet-A 3.4624 eV 358.08 nm f=0.2660  
 <S\*\*2>=0.000  
 155 -> 157 0.65102  
 156 -> 157 -0.10038  
 156 -> 158 0.19238

Excited State 4: Singlet-A 3.7223 eV 333.08 nm f=0.2713  
 <S\*\*2>=0.000  
 155 -> 158 -0.15604  
 156 -> 159 -0.27740  
 156 -> 160 -0.57321  
 156 -> 161 0.14173

|               |     |              |           |           |          |
|---------------|-----|--------------|-----------|-----------|----------|
| Excited State | 5:  | Singlet-A    | 3.7320 eV | 332.22 nm | f=0.0716 |
|               |     | <S**2>=0.000 |           |           |          |
|               |     | 156 -> 159   | -0.59049  |           |          |
|               |     | 156 -> 160   | 0.27546   |           |          |
|               |     | 156 -> 162   | 0.12362   |           |          |
|               |     | 156 -> 163   | -0.17639  |           |          |
| Excited State | 6:  | Singlet-A    | 3.8254 eV | 324.11 nm | f=0.0473 |
|               |     | <S**2>=0.000 |           |           |          |
|               |     | 154 -> 157   | -0.47133  |           |          |
|               |     | 155 -> 158   | 0.44304   |           |          |
|               |     | 156 -> 160   | -0.17536  |           |          |
| Excited State | 7:  | Singlet-A    | 3.9762 eV | 311.81 nm | f=0.0211 |
|               |     | <S**2>=0.000 |           |           |          |
|               |     | 156 -> 160   | -0.14046  |           |          |
|               |     | 156 -> 162   | 0.55699   |           |          |
|               |     | 156 -> 163   | 0.28400   |           |          |
|               |     | 156 -> 164   | -0.11824  |           |          |
|               |     | 156 -> 167   | -0.13864  |           |          |
|               |     | 156 -> 170   | 0.12008   |           |          |
| Excited State | 8:  | Singlet-A    | 4.0154 eV | 308.77 nm | f=0.0174 |
|               |     | <S**2>=0.000 |           |           |          |
|               |     | 156 -> 159   | 0.11491   |           |          |
|               |     | 156 -> 161   | 0.63322   |           |          |
|               |     | 156 -> 166   | 0.16171   |           |          |
|               |     | 156 -> 169   | 0.11934   |           |          |
| Excited State | 9:  | Singlet-A    | 4.0362 eV | 307.18 nm | f=0.1409 |
|               |     | <S**2>=0.000 |           |           |          |
|               |     | 150 -> 157   | -0.12012  |           |          |
|               |     | 154 -> 157   | -0.10389  |           |          |
|               |     | 156 -> 161   | -0.15518  |           |          |
|               |     | 156 -> 162   | -0.19324  |           |          |
|               |     | 156 -> 167   | 0.10836   |           |          |
|               |     | 156 -> 168   | -0.17588  |           |          |
|               |     | 156 -> 169   | 0.34984   |           |          |
|               |     | 156 -> 170   | 0.31615   |           |          |
|               |     | 156 -> 171   | -0.18501  |           |          |
|               |     | 156 -> 172   | 0.24751   |           |          |
| Excited State | 10: | Singlet-A    | 4.1110 eV | 301.59 nm | f=0.0056 |
|               |     | <S**2>=0.000 |           |           |          |
|               |     | 156 -> 163   | -0.14428  |           |          |
|               |     | 156 -> 164   | -0.60354  |           |          |
|               |     | 156 -> 165   | -0.17283  |           |          |
|               |     | 156 -> 168   | -0.24018  |           |          |

Cartesian coordinates (in Å) 14a-Ba(ClO<sub>4</sub>)<sub>2</sub> (UV/Vis).

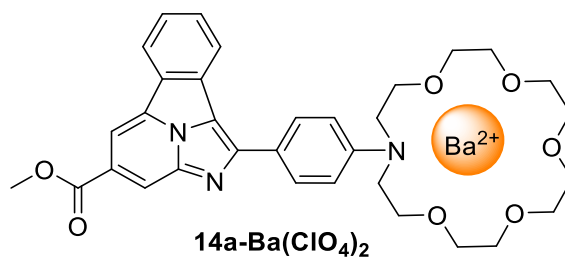

Standard orientation:

| Center Number | Atomic Number | Atomic Type | X         | Coordinates (Angstroms)<br>Y | Z         |
|---------------|---------------|-------------|-----------|------------------------------|-----------|
| 1             | 6             | 0           | -0.368426 | 2.475186                     | -1.322086 |
| 2             | 6             | 0           | 0.007083  | 3.208431                     | -0.187168 |
| 3             | 6             | 0           | 0.587005  | 2.292291                     | -2.327565 |
| 4             | 6             | 0           | 1.332887  | 3.551111                     | 0.025808  |
| 5             | 1             | 0           | -0.718324 | 3.387760                     | 0.595399  |
| 6             | 6             | 0           | 1.905101  | 2.683499                     | -2.143247 |
| 7             | 1             | 0           | 0.317807  | 1.756979                     | -3.229236 |
| 8             | 6             | 0           | 2.338264  | 3.185391                     | -0.898411 |
| 9             | 1             | 0           | 1.589477  | 4.017927                     | 0.964546  |
| 10            | 1             | 0           | 2.606258  | 2.494443                     | -2.939017 |
| 11            | 6             | 0           | 3.516740  | -3.323247                    | 0.977044  |
| 12            | 1             | 0           | 3.855573  | -3.195775                    | 2.013850  |
| 13            | 1             | 0           | 4.148334  | -4.087376                    | 0.504955  |
| 14            | 6             | 0           | 2.079447  | -3.795503                    | 0.902631  |
| 15            | 1             | 0           | 1.977693  | -4.748327                    | 1.434557  |
| 16            | 1             | 0           | 1.800208  | -3.935651                    | -0.141146 |
| 17            | 6             | 0           | 0.866924  | -2.880523                    | 2.819296  |
| 18            | 1             | 0           | 0.993658  | -3.898410                    | 3.204028  |
| 19            | 1             | 0           | -0.176652 | -2.588473                    | 2.909043  |
| 20            | 6             | 0           | 1.729843  | -1.918875                    | 3.620258  |
| 21            | 1             | 0           | 2.771885  | -2.257306                    | 3.697130  |
| 22            | 1             | 0           | 1.315194  | -1.845492                    | 4.633826  |
| 23            | 6             | 0           | 2.262081  | 0.397521                     | 3.764418  |
| 24            | 1             | 0           | 3.304264  | 0.149590                     | 4.012255  |
| 25            | 1             | 0           | 1.694057  | 0.518451                     | 4.695660  |
| 26            | 6             | 0           | 2.187237  | 1.676462                     | 2.955573  |
| 27            | 1             | 0           | 2.611583  | 2.505268                     | 3.530733  |
| 28            | 1             | 0           | 1.145020  | 1.900331                     | 2.729439  |
| 29            | 6             | 0           | 4.163797  | 2.134724                     | 1.610213  |
| 30            | 1             | 0           | 4.819690  | 1.419633                     | 1.119946  |
| 31            | 1             | 0           | 4.553646  | 2.350954                     | 2.612403  |
| 32            | 6             | 0           | 4.122286  | 3.430723                     | 0.793512  |
| 33            | 1             | 0           | 5.134644  | 3.846883                     | 0.784747  |
| 34            | 1             | 0           | 3.496713  | 4.173981                     | 1.288576  |
| 35            | 6             | 0           | 4.699953  | 2.821544                     | -1.545685 |
| 36            | 1             | 0           | 5.667803  | 3.084888                     | -1.115774 |
| 37            | 1             | 0           | 4.604288  | 3.401388                     | -2.471972 |
| 38            | 6             | 0           | 4.742387  | 1.342782                     | -1.956631 |
| 39            | 1             | 0           | 5.674091  | 1.208594                     | -2.526214 |
| 40            | 1             | 0           | 3.914408  | 1.054433                     | -2.605036 |
| 41            | 6             | 0           | 5.136778  | -0.838204                    | -1.172796 |
| 42            | 1             | 0           | 4.525351  | -1.217013                    | -1.994984 |
| 43            | 1             | 0           | 6.190471  | -0.831098                    | -1.489065 |
| 44            | 6             | 0           | 5.008316  | -1.756066                    | 0.016156  |
| 45            | 1             | 0           | 5.563035  | -2.672984                    | -0.215357 |
| 46            | 1             | 0           | 5.453091  | -1.301133                    | 0.911453  |
| 47            | 7             | 0           | 3.690326  | 3.266287                     | -0.589369 |
| 48            | 8             | 0           | 2.877575  | 1.512828                     | 1.711205  |

|    |    |   |           |           |           |
|----|----|---|-----------|-----------|-----------|
| 49 | 8  | 0 | 1.694542  | -0.647551 | 2.984131  |
| 50 | 8  | 0 | 1.153735  | -2.842178 | 1.419565  |
| 51 | 8  | 0 | 3.643379  | -2.092889 | 0.268697  |
| 52 | 8  | 0 | 4.745021  | 0.485576  | -0.821853 |
| 53 | 56 | 0 | 1.157387  | -0.358529 | 0.155087  |
| 54 | 6  | 0 | -2.919030 | 1.922261  | -1.028762 |
| 55 | 6  | 0 | -2.579515 | -0.308866 | -1.209843 |
| 56 | 6  | 0 | -4.803868 | 0.622642  | -0.627794 |
| 57 | 6  | 0 | -3.082611 | -1.603549 | -1.089246 |
| 58 | 1  | 0 | -2.453006 | -2.471005 | -1.223522 |
| 59 | 6  | 0 | -5.306034 | -0.654156 | -0.506281 |
| 60 | 1  | 0 | -6.326929 | -0.836403 | -0.208671 |
| 61 | 6  | 0 | -4.433012 | -1.752252 | -0.747529 |
| 62 | 6  | 0 | -5.162811 | 2.020662  | -0.426225 |
| 63 | 6  | 0 | -3.991216 | 2.823834  | -0.671977 |
| 64 | 6  | 0 | -6.360100 | 2.623408  | -0.044090 |
| 65 | 1  | 0 | -7.242428 | 2.023611  | 0.146205  |
| 66 | 6  | 0 | -4.054873 | 4.210533  | -0.526707 |
| 67 | 6  | 0 | -5.260045 | 4.787955  | -0.145947 |
| 68 | 1  | 0 | -5.321801 | 5.863753  | -0.029545 |
| 69 | 6  | 0 | -6.400991 | 4.005629  | 0.093637  |
| 70 | 1  | 0 | -3.179479 | 4.822333  | -0.708262 |
| 71 | 7  | 0 | -3.491748 | 0.684811  | -1.000587 |
| 72 | 1  | 0 | -7.324281 | 4.487617  | 0.391897  |
| 73 | 7  | 0 | -1.372540 | 0.278298  | -1.402050 |
| 74 | 6  | 0 | -1.569903 | 1.637069  | -1.302241 |
| 75 | 6  | 0 | -4.926981 | -3.149285 | -0.601598 |
| 76 | 8  | 0 | -4.250614 | -4.139999 | -0.753656 |
| 77 | 8  | 0 | -6.238199 | -3.199459 | -0.272753 |
| 78 | 6  | 0 | -6.784196 | -4.517769 | -0.104180 |
| 79 | 1  | 0 | -7.829933 | -4.367763 | 0.154709  |
| 80 | 1  | 0 | -6.693616 | -5.088302 | -1.029387 |
| 81 | 1  | 0 | -6.261397 | -5.046311 | 0.693955  |
| 82 | 17 | 0 | 1.732565  | -1.977750 | -2.852297 |
| 83 | 17 | 0 | -1.632866 | 0.117351  | 2.289092  |
| 84 | 8  | 0 | 2.929309  | -2.842321 | -2.991287 |
| 85 | 8  | 0 | 2.176615  | -0.574609 | -2.444474 |
| 86 | 8  | 0 | 0.878311  | -2.465667 | -1.697289 |
| 87 | 8  | 0 | 0.952136  | -1.922026 | -4.094278 |
| 88 | 8  | 0 | -1.240104 | -1.134499 | 1.534580  |
| 89 | 8  | 0 | -0.686211 | 1.197084  | 1.787130  |
| 90 | 8  | 0 | -1.434920 | -0.086913 | 3.743253  |
| 91 | 8  | 0 | -3.023865 | 0.488427  | 1.974072  |

### Excitation energies and oscillator strengths 14a- Ba(ClO<sub>4</sub>)<sub>2</sub> (UV/Vis).

Excited State 1: Singlet-A 3.3230 eV 373.11 nm f=0.2515  
 <S\*\*2>=0.000  
 208 -> 214 0.11692  
 209 -> 211 0.18609  
 209 -> 214 0.13615  
 210 -> 211 0.63690

This state for optimization and/or second-order correction.

Total Energy, E(TD-HF/TD-DFT) = -3516.74521275

Copying the excited state density for this state as the 1-particle RhoCI density.

Excited State 2: Singlet-A 3.6696 eV 337.87 nm f=0.0245  
 <S\*\*2>=0.000  
 209 -> 211 0.48168  
 210 -> 211 -0.16587  
 210 -> 212 -0.33272  
 210 -> 214 -0.29375

Excited State 3: Singlet-A 3.7001 eV 335.08 nm f=0.0036  
 <S\*\*2>=0.000

|               |     |              |           |           |          |
|---------------|-----|--------------|-----------|-----------|----------|
|               |     | 209 -> 211   | 0.24248   |           |          |
|               |     | 209 -> 212   | -0.16391  |           |          |
|               |     | 210 -> 212   | 0.55173   |           |          |
|               |     | 210 -> 213   | 0.16649   |           |          |
|               |     | 210 -> 214   | -0.22585  |           |          |
| Excited State | 4:  | Singlet-A    | 3.8240 eV | 324.23 nm | f=0.0851 |
|               |     | <S**2>=0.000 |           |           |          |
|               |     | 208 -> 211   | -0.31795  |           |          |
|               |     | 209 -> 211   | 0.31564   |           |          |
|               |     | 209 -> 214   | 0.25924   |           |          |
|               |     | 210 -> 211   | -0.20643  |           |          |
|               |     | 210 -> 212   | 0.11076   |           |          |
|               |     | 210 -> 214   | 0.38395   |           |          |
| Excited State | 5:  | Singlet-A    | 3.9318 eV | 315.33 nm | f=0.0023 |
|               |     | <S**2>=0.000 |           |           |          |
|               |     | 209 -> 213   | -0.11881  |           |          |
|               |     | 210 -> 212   | -0.20304  |           |          |
|               |     | 210 -> 213   | 0.60472   |           |          |
|               |     | 210 -> 216   | 0.22958   |           |          |
| Excited State | 6:  | Singlet-A    | 4.0155 eV | 308.76 nm | f=0.0136 |
|               |     | <S**2>=0.000 |           |           |          |
|               |     | 209 -> 215   | -0.12730  |           |          |
|               |     | 210 -> 214   | 0.15864   |           |          |
|               |     | 210 -> 215   | 0.63628   |           |          |
|               |     | 210 -> 218   | -0.12657  |           |          |
| Excited State | 7:  | Singlet-A    | 4.1088 eV | 301.76 nm | f=0.1639 |
|               |     | <S**2>=0.000 |           |           |          |
|               |     | 208 -> 211   | -0.22919  |           |          |
|               |     | 209 -> 211   | -0.15499  |           |          |
|               |     | 209 -> 212   | 0.11264   |           |          |
|               |     | 209 -> 214   | 0.42216   |           |          |
|               |     | 209 -> 215   | -0.10617  |           |          |
|               |     | 210 -> 214   | -0.37675  |           |          |
|               |     | 210 -> 215   | 0.15839   |           |          |
|               |     | 210 -> 216   | 0.12207   |           |          |
| Excited State | 8:  | Singlet-A    | 4.1706 eV | 297.28 nm | f=0.0048 |
|               |     | <S**2>=0.000 |           |           |          |
|               |     | 209 -> 211   | 0.12148   |           |          |
|               |     | 209 -> 212   | 0.53609   |           |          |
|               |     | 209 -> 214   | -0.13144  |           |          |
|               |     | 210 -> 212   | 0.11181   |           |          |
|               |     | 210 -> 214   | 0.10805   |           |          |
|               |     | 210 -> 216   | 0.31484   |           |          |
|               |     | 210 -> 219   | 0.12536   |           |          |
| Excited State | 9:  | Singlet-A    | 4.1941 eV | 295.62 nm | f=0.0099 |
|               |     | <S**2>=0.000 |           |           |          |
|               |     | 209 -> 212   | -0.38251  |           |          |
|               |     | 210 -> 213   | -0.21622  |           |          |
|               |     | 210 -> 216   | 0.42540   |           |          |
|               |     | 210 -> 217   | -0.14254  |           |          |
|               |     | 210 -> 218   | 0.10587   |           |          |
|               |     | 210 -> 219   | 0.16796   |           |          |
|               |     | 210 -> 221   | 0.16008   |           |          |
| Excited State | 10: | Singlet-A    | 4.2659 eV | 290.64 nm | f=0.0499 |
|               |     | <S**2>=0.000 |           |           |          |
|               |     | 209 -> 225   | -0.10100  |           |          |
|               |     | 210 -> 213   | 0.11636   |           |          |
|               |     | 210 -> 216   | -0.22098  |           |          |
|               |     | 210 -> 217   | -0.19508  |           |          |
|               |     | 210 -> 218   | 0.12504   |           |          |
|               |     | 210 -> 219   | 0.15173   |           |          |



210 -> 220 0.11005  
 210 -> 221 0.20574  
 210 -> 222 0.13792  
 210 -> 223 -0.15180  
 210 -> 224 -0.16349  
 210 -> 225 0.36954  
 210 -> 227 -0.13082

**Cartesian coordinates (in Å) 14a-Ba(ClO<sub>4</sub>)<sub>2</sub> (Emission)**

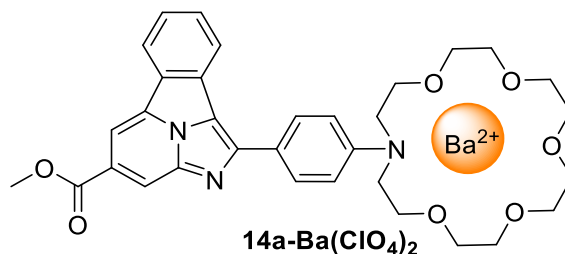

| Center Number | Atomic Number | Atomic Type | Coordinates (Angstroms) |           |           |
|---------------|---------------|-------------|-------------------------|-----------|-----------|
|               |               |             | X                       | Y         | Z         |
| 1             | 6             | 0           | 0.115104                | -1.820811 | -1.955880 |
| 2             | 6             | 0           | -0.249072               | -2.925752 | -1.156141 |
| 3             | 6             | 0           | -0.893291               | -1.223360 | -2.740466 |
| 4             | 6             | 0           | -1.576028               | -3.240665 | -0.960816 |
| 5             | 1             | 0           | 0.506909                | -3.434386 | -0.569800 |
| 6             | 6             | 0           | -2.217807               | -1.576783 | -2.586308 |
| 7             | 1             | 0           | -0.631449               | -0.412469 | -3.410452 |
| 8             | 6             | 0           | -2.611171               | -2.502364 | -1.593311 |
| 9             | 1             | 0           | -1.806525               | -4.038626 | -0.270150 |
| 10            | 1             | 0           | -2.949282               | -1.064364 | -3.189745 |
| 11            | 6             | 0           | -2.843680               | 3.087131  | 1.970859  |
| 12            | 1             | 0           | -3.077513               | 2.754915  | 2.991058  |
| 13            | 1             | 0           | -3.446336               | 3.976404  | 1.748314  |
| 14            | 6             | 0           | -1.382259               | 3.442580  | 1.815281  |
| 15            | 1             | 0           | -1.100718               | 4.190067  | 2.565087  |
| 16            | 1             | 0           | -1.212853               | 3.850810  | 0.820614  |
| 17            | 6             | 0           | -0.151936               | 1.906957  | 3.225157  |
| 18            | 1             | 0           | -0.132849               | 2.775630  | 3.892815  |
| 19            | 1             | 0           | 0.856148                | 1.513001  | 3.128685  |
| 20            | 6             | 0           | -1.055404               | 0.837754  | 3.821778  |
| 21            | 1             | 0           | -2.004857               | 1.246349  | 4.190664  |
| 22            | 1             | 0           | -0.520555               | 0.375648  | 4.659439  |
| 23            | 6             | 0           | -1.841215               | -1.340965 | 3.405006  |
| 24            | 1             | 0           | -2.700642               | -1.099862 | 4.045447  |
| 25            | 1             | 0           | -1.054034               | -1.812606 | 4.005762  |
| 26            | 6             | 0           | -2.266214               | -2.284507 | 2.299068  |
| 27            | 1             | 0           | -2.732775               | -3.165843 | 2.752596  |
| 28            | 1             | 0           | -1.391939               | -2.607032 | 1.732055  |
| 29            | 6             | 0           | -4.399082               | -2.289671 | 1.175634  |
| 30            | 1             | 0           | -5.132345               | -1.518172 | 0.952111  |
| 31            | 1             | 0           | -4.720536               | -2.833998 | 2.073227  |
| 32            | 6             | 0           | -4.321056               | -3.273392 | 0.004157  |
| 33            | 1             | 0           | -5.309109               | -3.727980 | -0.116579 |
| 34            | 1             | 0           | -3.642473               | -4.090991 | 0.243231  |
| 35            | 6             | 0           | -4.975796               | -1.938656 | -1.980748 |
| 36            | 1             | 0           | -5.925470               | -2.327347 | -1.610291 |
| 37            | 1             | 0           | -4.924497               | -2.193891 | -3.045435 |
| 38            | 6             | 0           | -5.000793               | -0.400521 | -1.866272 |
| 39            | 1             | 0           | -6.040898               | -0.087927 | -2.034450 |

|    |    |   |           |           |           |
|----|----|---|-----------|-----------|-----------|
| 40 | 1  | 0 | -4.386141 | 0.100043  | -2.617290 |
| 41 | 6  | 0 | -5.025629 | 1.320944  | -0.291221 |
| 42 | 1  | 0 | -4.658186 | 2.031993  | -1.037675 |
| 43 | 1  | 0 | -6.125097 | 1.333615  | -0.290339 |
| 44 | 6  | 0 | -4.542947 | 1.726999  | 1.076747  |
| 45 | 1  | 0 | -5.117126 | 2.607422  | 1.385149  |
| 46 | 1  | 0 | -4.713012 | 0.921561  | 1.803071  |
| 47 | 7  | 0 | -3.939430 | -2.664724 | -1.260622 |
| 48 | 8  | 0 | -3.177993 | -1.616389 | 1.430882  |
| 49 | 8  | 0 | -1.337906 | -0.144496 | 2.836293  |
| 50 | 8  | 0 | -0.547937 | 2.300158  | 1.918771  |
| 51 | 8  | 0 | -3.161161 | 2.054950  | 1.049713  |
| 52 | 8  | 0 | -4.578623 | 0.009024  | -0.584120 |
| 53 | 56 | 0 | -1.120289 | 0.256365  | 0.105595  |
| 54 | 6  | 0 | 2.642238  | -1.629635 | -1.312530 |
| 55 | 6  | 0 | 2.618753  | 0.627398  | -1.381501 |
| 56 | 6  | 0 | 4.632062  | -0.640268 | -0.671152 |
| 57 | 6  | 0 | 3.276053  | 1.848384  | -1.148933 |
| 58 | 1  | 0 | 2.796192  | 2.802101  | -1.304462 |
| 59 | 6  | 0 | 5.303841  | 0.566841  | -0.429839 |
| 60 | 1  | 0 | 6.316547  | 0.593462  | -0.059495 |
| 61 | 6  | 0 | 4.602805  | 1.764177  | -0.675031 |
| 62 | 6  | 0 | 4.786076  | -2.067751 | -0.590800 |
| 63 | 6  | 0 | 3.537767  | -2.690144 | -1.005869 |
| 64 | 6  | 0 | 5.846184  | -2.876538 | -0.190279 |
| 65 | 1  | 0 | 6.782217  | -2.440113 | 0.137411  |
| 66 | 6  | 0 | 3.405305  | -4.081275 | -1.021172 |
| 67 | 6  | 0 | 4.481374  | -4.862083 | -0.621269 |
| 68 | 1  | 0 | 4.397307  | -5.941123 | -0.625673 |
| 69 | 6  | 0 | 5.683448  | -4.259648 | -0.209335 |
| 70 | 1  | 0 | 2.479993  | -4.541410 | -1.348184 |
| 71 | 7  | 0 | 3.354989  | -0.478975 | -1.123547 |
| 72 | 1  | 0 | 6.507382  | -4.890100 | 0.103888  |
| 73 | 7  | 0 | 1.374610  | 0.231456  | -1.769476 |
| 74 | 6  | 0 | 1.348595  | -1.122938 | -1.741838 |
| 75 | 6  | 0 | 5.281155  | 3.072625  | -0.418489 |
| 76 | 8  | 0 | 4.761745  | 4.146289  | -0.572319 |
| 77 | 8  | 0 | 6.547317  | 2.930318  | 0.006719  |
| 78 | 6  | 0 | 7.237835  | 4.151138  | 0.269119  |
| 79 | 1  | 0 | 8.232419  | 3.862613  | 0.598710  |
| 80 | 1  | 0 | 7.291736  | 4.757529  | -0.635395 |
| 81 | 1  | 0 | 6.723163  | 4.717384  | 1.045822  |
| 82 | 17 | 0 | -1.942572 | 2.805766  | -2.068896 |
| 83 | 17 | 0 | 1.655770  | -1.062351 | 1.997610  |
| 84 | 8  | 0 | -2.960229 | 3.755757  | -1.616365 |
| 85 | 8  | 0 | -2.521030 | 1.419894  | -2.060094 |
| 86 | 8  | 0 | -0.822060 | 2.760194  | -1.085262 |
| 87 | 8  | 0 | -1.455972 | 3.134098  | -3.393570 |
| 88 | 8  | 0 | 1.471836  | 0.247810  | 1.306037  |
| 89 | 8  | 0 | 0.643781  | -1.972436 | 1.385772  |
| 90 | 8  | 0 | 1.384975  | -0.912173 | 3.431868  |
| 91 | 8  | 0 | 3.000322  | -1.565787 | 1.768510  |

-----

### Excitation energies and oscillator strengths 14a-Ba(ClO<sub>4</sub>)<sub>2</sub> (Emission).

Excited State 1: Singlet-A 3.0199 eV 410.56 nm f=0.3328  
<S\*\*2>=0.000  
209 -> 215 0.10989  
210 -> 211 0.67571  
This state for optimization and/or second-order correction.  
Total Energy, E(TD-HF/TD-DFT) = -3516.75124668

Copying the excited state density for this state as the 1-particle RhoCI density.

|               |    |              |           |           |          |
|---------------|----|--------------|-----------|-----------|----------|
| Excited State | 2: | Singlet-A    | 3.5288 eV | 351.35 nm | f=0.0603 |
|               |    | <S**2>=0.000 |           |           |          |
|               |    | 208 -> 211   | 0.10922   |           |          |
|               |    | 209 -> 211   | 0.49835   |           |          |
|               |    | 210 -> 212   | -0.10427  |           |          |
|               |    | 210 -> 215   | -0.44317  |           |          |
| Excited State | 3: | Singlet-A    | 3.6275 eV | 341.79 nm | f=0.0102 |
|               |    | <S**2>=0.000 |           |           |          |
|               |    | 209 -> 212   | 0.11460   |           |          |
|               |    | 210 -> 212   | 0.66336   |           |          |
|               |    | 210 -> 213   | 0.13656   |           |          |
| Excited State | 4: | Singlet-A    | 3.7848 eV | 327.58 nm | f=0.2718 |
|               |    | <S**2>=0.000 |           |           |          |
|               |    | 208 -> 211   | -0.35826  |           |          |
|               |    | 209 -> 211   | 0.37843   |           |          |
|               |    | 209 -> 215   | -0.13203  |           |          |
|               |    | 210 -> 211   | 0.11297   |           |          |
|               |    | 210 -> 215   | 0.34941   |           |          |
|               |    | 210 -> 216   | -0.11130  |           |          |
|               |    | 210 -> 217   | 0.10621   |           |          |
|               |    | 210 -> 219   | -0.15021  |           |          |
| Excited State | 5: | Singlet-A    | 3.8425 eV | 322.66 nm | f=0.0155 |
|               |    | <S**2>=0.000 |           |           |          |
|               |    | 209 -> 211   | -0.14941  |           |          |
|               |    | 210 -> 212   | -0.13188  |           |          |
|               |    | 210 -> 213   | 0.51096   |           |          |
|               |    | 210 -> 214   | 0.29233   |           |          |
|               |    | 210 -> 216   | -0.22180  |           |          |
|               |    | 210 -> 217   | 0.16510   |           |          |
|               |    | 210 -> 219   | -0.10353  |           |          |
| Excited State | 6: | Singlet-A    | 3.9299 eV | 315.49 nm | f=0.0184 |
|               |    | <S**2>=0.000 |           |           |          |
|               |    | 210 -> 213   | -0.40986  |           |          |
|               |    | 210 -> 214   | 0.47661   |           |          |
|               |    | 210 -> 217   | 0.12896   |           |          |
|               |    | 210 -> 219   | -0.18030  |           |          |
| Excited State | 7: | Singlet-A    | 3.9802 eV | 311.50 nm | f=0.0446 |
|               |    | <S**2>=0.000 |           |           |          |
|               |    | 210 -> 214   | 0.37375   |           |          |
|               |    | 210 -> 215   | 0.12180   |           |          |
|               |    | 210 -> 216   | 0.19835   |           |          |
|               |    | 210 -> 217   | -0.21134  |           |          |
|               |    | 210 -> 219   | 0.43560   |           |          |
| Excited State | 8: | Singlet-A    | 4.0357 eV | 307.22 nm | f=0.0404 |
|               |    | <S**2>=0.000 |           |           |          |
|               |    | 208 -> 211   | -0.15520  |           |          |
|               |    | 209 -> 215   | -0.16312  |           |          |
|               |    | 210 -> 215   | -0.10358  |           |          |
|               |    | 210 -> 217   | 0.12684   |           |          |
|               |    | 210 -> 218   | -0.11449  |           |          |
|               |    | 210 -> 219   | 0.23060   |           |          |
|               |    | 210 -> 220   | 0.14109   |           |          |
|               |    | 210 -> 221   | -0.27122  |           |          |
|               |    | 210 -> 222   | -0.24869  |           |          |
|               |    | 210 -> 223   | 0.36698   |           |          |
| Excited State | 9: | Singlet-A    | 4.1260 eV | 300.49 nm | f=0.0174 |
|               |    | <S**2>=0.000 |           |           |          |
|               |    | 208 -> 211   | 0.10997   |           |          |

|            |          |
|------------|----------|
| 209 -> 212 | 0.10824  |
| 210 -> 213 | 0.10633  |
| 210 -> 215 | 0.13224  |
| 210 -> 216 | 0.47960  |
| 210 -> 217 | 0.16154  |
| 210 -> 218 | 0.22494  |
| 210 -> 219 | -0.20520 |
| 210 -> 222 | -0.14382 |
| 210 -> 223 | 0.19686  |

Excited State 10: Singlet-A 4.1575 eV 298.22 nm f=0.1962  
 <S\*\*2>=0.000

|            |          |
|------------|----------|
| 208 -> 211 | 0.36244  |
| 209 -> 211 | 0.17931  |
| 209 -> 215 | 0.34626  |
| 210 -> 215 | 0.30002  |
| 210 -> 216 | -0.19576 |
| 210 -> 218 | -0.12625 |
| 210 -> 223 | 0.13722  |

### Calculated Emission Spectrum 14a-Ba

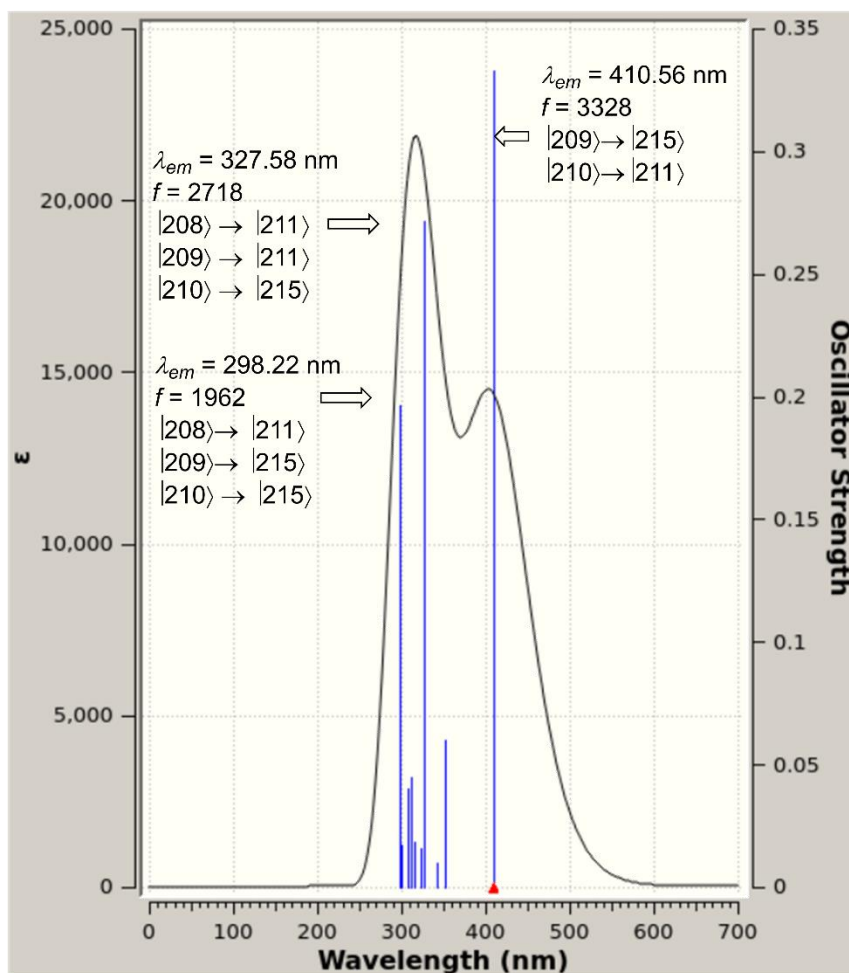

**Figure S4.** Emission spectrum of compound **14a-Ba(ClO<sub>4</sub>)<sub>2</sub>**, calculated at the TDDFT(Nstates=5) M06/6-311++G\*\*&Def2TZVPP level of theory. The main transitions and the KS-MOs associated with them are indicated, as well as the respective emission wavelengths ( $\lambda_{em}$ ) and the oscillator strengths ( $f$ )

**Cartesian coordinates (in Å) of model molecule 16.**

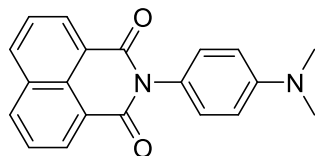

| Center<br>Number | Atomic<br>Number | Atomic<br>Type | Coordinates (Angstroms) |           |           |
|------------------|------------------|----------------|-------------------------|-----------|-----------|
|                  |                  |                | X                       | Y         | Z         |
| 1                | 6                | 0              | -3.383949               | -0.087648 | 1.195175  |
| 2                | 6                | 0              | -4.113615               | -0.103943 | -0.000268 |
| 3                | 6                | 0              | -3.383934               | -0.082630 | -1.195692 |
| 4                | 6                | 0              | -2.003072               | -0.063285 | -1.187964 |
| 5                | 6                | 0              | -1.301587               | -0.056822 | -0.000214 |
| 6                | 6                | 0              | -2.003011               | -0.068293 | 1.187453  |
| 7                | 7                | 0              | 0.137920                | -0.031272 | -0.000155 |
| 8                | 6                | 0              | 0.802721                | -1.257292 | -0.001340 |
| 9                | 6                | 0              | 2.288569                | -1.219654 | -0.001054 |
| 10               | 6                | 0              | 2.969217                | 0.018879  | 0.000071  |
| 11               | 6                | 0              | 2.245033                | 1.232494  | 0.000938  |
| 12               | 6                | 0              | 0.758782                | 1.217362  | 0.000754  |
| 13               | 6                | 0              | 4.374763                | 0.043829  | 0.000305  |
| 14               | 6                | 0              | 5.030216                | 1.301192  | 0.001407  |
| 15               | 6                | 0              | 4.316229                | 2.460442  | 0.002220  |
| 16               | 6                | 0              | 2.905112                | 2.426572  | 0.001983  |
| 17               | 6                | 0              | 2.990572                | -2.389566 | -0.001906 |
| 18               | 6                | 0              | 4.402020                | -2.373330 | -0.001651 |
| 19               | 6                | 0              | 5.074433                | -1.189494 | -0.000580 |
| 20               | 8                | 0              | 0.197950                | -2.285987 | -0.002499 |
| 21               | 8                | 0              | 0.117964                | 2.224193  | 0.001366  |
| 22               | 7                | 0              | -5.503515               | -0.156028 | -0.000645 |
| 23               | 6                | 0              | -6.204752               | 0.135249  | 1.230808  |
| 24               | 6                | 0              | -6.204363               | 0.148255  | -1.229265 |
| 25               | 1                | 0              | 2.337655                | 3.337227  | 0.002630  |
| 26               | 1                | 0              | 4.821345                | 3.408739  | 0.003046  |
| 27               | 1                | 0              | 6.150185                | -1.177106 | -0.000396 |
| 28               | 1                | 0              | 6.105731                | 1.326982  | 0.001592  |
| 29               | 1                | 0              | 2.455748                | -3.319766 | -0.002774 |
| 30               | 1                | 0              | 4.940447                | -3.303114 | -0.002312 |
| 31               | 1                | 0              | -1.470352               | -0.057755 | 2.121284  |
| 32               | 1                | 0              | -1.470427               | -0.048908 | -2.121750 |
| 33               | 1                | 0              | -3.883676               | -0.082157 | -2.142935 |
| 34               | 1                | 0              | -3.883564               | -0.090800 | 2.142470  |
| 35               | 1                | 0              | -5.954940               | -0.566714 | -2.003465 |
| 36               | 1                | 0              | -5.989882               | 1.148855  | -1.604372 |
| 37               | 1                | 0              | -7.268276               | 0.071882  | -1.055926 |
| 38               | 1                | 0              | -7.268463               | 0.055982  | 1.057470  |
| 39               | 1                | 0              | -5.994121               | 1.133510  | 1.614350  |
| 40               | 1                | 0              | -5.951870               | -0.585292 | 1.998659  |

## 7. References

- 1 D. Cheng, X. Liu, Y. Xie, H. Lv, Z. Wang, H. Yang, A. Han, X. Yang, L. Zang, A Ratiometric Fluorescent Sensor for Cd<sup>2+</sup> Based on Internal Charge Transfer, *Sensors*, 2017, **17**, 2517.
- 2 J. L. Hutter, J. Bechhoefer, Calibration of atomic-force microscope tips, *Rev. Sci. Instrum.*, 1993, **64**, 1868–1873.
- 3 J. Schindelin, I. Arganda-Carreras, E. Frise, V. Kaynig, M. Longair, T. Pietzsch, S. Preibisch, C. Rueden, S. Saalfeld, B. Schmid, J.-Y. Tinevez, D. J. White, V. Hartenstein, K. Eliceri, P. Tomancak, A. Cardona, Fiji: an open-source platform for biological-image analysis, *Nat. Methods*, 2012, **9**, 676–682.
- 4 J. W. Sibert, P. B. Forshee, G. R. Hundt, A. L. Sargent, S. G. Bott and V. Lynch, Wurster's Crowns: A Comparative Study of ortho- and para-Phenylenediamine-Containing Macrocyclic Receptors, *Inorg. Chem.*, 2007, **46**, 10913–10925.
- 5 P. Thapa, N. K. Byrnes, A. A. Denisenko, J. X. Mao, A. D. McDonald, D. A. Newhouse, T. T. Vuong, K. Woodruff, K. Nam, D. R. Nygren, B. J. P. Jones and F. W. Foss Jr., Demonstration of Selective Single-Barium Ion Detection with Dry Diazacrown Ether Naphthalimide Turn-on Chemosensors, *ACS Sens.*, 2021, **6**, 192–202.
- 6 S.-W. Chen, T. T. A. Hong, C.-T. Chiang, L.-K. Chau and C.-L. Huang, Versatile Thiol- and Amino-Functionalized Silatranes for in-situ polymerization and Immobilization of Gold Nanoparticles, *J. Taiwan Inst. Chem. Eng.*, 2022, **132**, 104129.
- 7 X.-X. Zhang and S. L. Buchwald, Efficient Synthesis of N-Aryl-Aza-Crown Ethers via Palladium-Catalyzed Amination, *J. Org. Chem.*, 2000, **65**, 8027–8031.
- 8 P. Deveci, B. Taner, Z. Ustundag, E. Ozcan, A. O. Solak and Z. Kilic, Synthesis, enhanced spectroscopic characterization and electrochemical grafting of N-(4-aminophenyl)aza-18-crown-6: Application of DEPT, HETCOR, HMBC-NMR and x-ray photoelectron spectroscopy, *J. Mol. Struct.*, 2010, **982**, 162–168.
- 9 B. Das, K. Venkateswarlu, K. Damodar and K. Suneel, Ammonium acetate catalyzed improved method for the regioselective conversion of olefins into halohydrins and haloethers at room temperature, *J. Mol. Catal. A: Chem.*, 2007, **269**, 17–21.
- 10 T. Ishiyama, M. Murata and N. Miyaura, Palladium(0)-Catalyzed Cross-Coupling Reaction of Alkoxydiboron with Haloarenes: A Direct Procedure for Arylboronic Esters, *J. Org. Chem.*, 1995, **60**, 7508–7510.
- 11 D. H. Byun, E. Y. Canales, L. P. Debien, P. Jansa, R. A. Lee, J. A. Loyer-Drew, S. Perreault, H.-J. Pyun, R. D. Saito, M. S. Sangi, A. J. Schirer, M. E. Shatskikh, J. G. Taylor, J. A. Treiberg, J. J. Van Veldhuizen and L. Xu, Inhibitors of Peptidylarginine Deiminases, WO2022140428A2, 2022.
- 12 C. F. Claiborne, S. Critchley, S. P. Langston, E. J. Olhava, S. Peluso, G. S. Weatherhead, S. Vyskocil, I. Visiers, H. Mizutani and C. Cullis, Preparation of carbocyclic purine nucleoside analogs as antitumor agents and inhibitors of E1 activating enzymes, WO2008019124, 2008.
- 13 R. Semwal, A. Joshi, R. Kumar and S. Adimurthy, Annulation of imidazo[1,2-*a*]pyridines under metal-free conditions, *New J. Chem.*, 2020, **44**, 20530–20534.
- 14 É. Lévesque, W. S. Bechara, L. Constantineau-Forget, G. Pelletier, N. M. Rachel, J. N. Pelletier and A. B. Charette, General C–H Arylation Strategy for the Synthesis of Tunable Visible Light-Emitting Benzo[*a*]imidazo[2,1,5-*c,d*]indolizine Fluorophores, *J. Org. Chem.*, 2017, **82**, 5046–5067.
- 15 A. Sanchez-Sanchez, I. Rivilla, M. Aguirre, A. Basterretxea, A. Etxeberria, A. Veloso, H. Sardon, D. Mecerreyes and F. P. Cossío, Enantioselective Ring-Opening Polymerization of *rac*-Lactide Dictated by Densely Substituted Amino Acids, *J. Am. Chem. Soc.*, 2017, **139**, 4805–4814.
- 16 R. Chinchilla, D. J. Dodsworth, C. Nájera and J. M. Soriano, Ammonium salts from polymer-bound *N*-hydroxysuccinimide as solid-supported reagents for EDC-mediated amidations, *Tetrahedron Lett.*, 2003, **44**, 463–466.
